# Supplementary material for: Fe-phosphates in Jezero Crater: Chemical, Structural, and Spectral Evidence for an Ancient Habitable Environment on Mars
Source: Research Square preprint supplement (doi:10.21203/rs.3.rs-5240266/v1), 2024-10-14
Supplement: Supplementary file 1 [file 4d72c43e3e51824eaf94be1f.xlsx]

## Sheet: wt%
Table S7: Ouzel Falls Concentrations for maps collected on Sols 789, 790, and 811 corrected for topography and diffraction effects
Map	PMC	SiO2 (wt%)	SiO2 (err, wt%)	Na2O (wt%)	Na2O (err, wt%)	Al2O3 (wt%)	Al2O3 (err, wt%)	FeO (wt%)	FeO (err, wt%)	MgO (wt%)	MgO (err, wt%)	CaO (wt%)	CaO (err, wt%)	P2O5 (wt%)	P2O5 (err, wt%)	SO3 (wt%)	SO3 (err, wt%)	Cl (wt%)	Cl (err, wt%)	K2O (wt%)	K2O (err, wt%)	MnO (wt%)	MnO (err, wt%)	Cr2O3 (wt%)	Cr2O3 (err, wt%)	TiO2 (wt%)	TiO2 (err, wt%)
Sol 789	4	46.072	1.68638	0.94895	0.863028	0.355723	0.193995	24.0959	0.862877	22.9249	0.998824	0	0	0.0244175	0.0403448	3.41597	0.38971	0.74345	0.183388	0	0	0.257484	0.149485	0.280619	0.155608	0	0
Sol 789	5	39.6798	1.44408	0.406427	0.816966	0.557883	0.196986	25.3745	0.903185	24.3595	1.04343	0.102955	0.0851578	0.0176388	0.0379261	4.24019	0.317086	1.1319	0.255835	0	0	0.297367	0.159037	0.0691899	0.0615967	0	0
Sol 789	6	35.3471	1.29437	0	0	0.551961	0.181669	26.9319	0.963105	25.1014	1.08446	0.184362	0.129836	0	0	4.39514	0.296459	1.18322	0.264631	0	0	0.315131	0.162685	0	0	0	0
Sol 789	7	33.2076	1.20876	0.266544	0.802082	0.763325	0.218803	27.3072	0.968375	26.7848	1.13156	0.0916708	0.0773945	0	0	2.59748	0.3999	0.749897	0.26079	0	0	0.327878	0.163225	0	0	0	0
Sol 789	8	36.6063	1.8793	0.427024	0.793031	2.18307	0.385419	20.4592	0.726849	23.2255	0.995022	0.247822	0.150464	0	0	1.98591	0.531324	1.06238	0.349059	0.14837	0.112246	0.205863	0.138238	0	0	0.295181	0.233931
Sol 789	9	51.6714	1.89933	1.02036	1.09141	0.972107	0.258103	13.109	0.663234	15.367	0.979969	0.157347	0.117721	0	0	3.43244	0.366672	0.806996	0.199006	0	0	0.149826	0.154528	0	0	0.0613955	0.0642647
Sol 789	10	70.7932	2.55715	0	0	0.139082	0.129507	4.70858	0.292148	5.55365	0.365283	0.133314	0.15071	0.0523489	0.0642876	3.69239	0.337825	0.648059	0.165149	0	0	0.023788	0.0362552	0	0	0	0
Sol 789	11	72.1709	2.59608	0	0	0.195721	0.157911	4.35298	0.290196	4.3937	0.374986	0.0825734	0.0984855	0	0	2.60102	0.522502	0.889975	0.213253	0	0	0.0133328	0.0252794	0	0	0.00376403	0.0118442
Sol 789	12	77.36	2.77242	0.0451925	0.614215	0.221814	0.152895	4.17406	0.307309	4.86576	0.334758	0.186174	0.181319	0.03567	0.0491372	2.13739	0.376092	1.00822	0.235129	0	0	0.0138314	0.0252266	0	0	0	0
Sol 789	13	51.0301	1.83363	0	0	0.173284	0.155041	19.44	0.691147	10.6952	0.550517	0.263888	0.219497	0.00929111	0.03142	3.23198	0.392629	1.62094	0.326632	0	0	0.253553	0.153143	0	0	0	0
Sol 789	14	49.5571	1.81761	0	0	0.258786	0.165758	13.7138	0.492531	7.29592	0.423922	0.271291	0.208179	0.0646894	0.0759394	5.00457	0.252297	2.01755	0.367622	0	0	0.0995321	0.0827067	0	0	0	0
Sol 789	15	39.7417	2.03296	1.31147	0.956724	1.19025	0.289126	19.8671	0.705114	11.8022	0.847463	0.0797502	0.0701216	0.0523961	0.0593277	4.87176	0.273183	3.24019	0.580855	0	0	0.0720464	0.0637852	0.418434	0.221743	0.0291736	0.0373383
Sol 789	16	47.824	1.73388	0	0	1.36958	0.31659	18.0653	0.645309	15.8856	0.738157	0.0199287	0.0345183	0	0	5.11946	0.215222	3.84396	0.355708	0.0107255	0.0263127	0.0443158	0.046672	0.886772	0.210598	0.0182515	0.0327424
Sol 789	17	40.487	1.46557	0.872365	1.25738	1.17619	0.287089	21.2053	0.752373	16.0626	0.750431	0.441564	0.146878	0	0	7.78639	0.305238	3.24244	0.394885	0.0338548	0.0423642	0.155098	0.115639	0.0464429	0.0485446	0	0
Sol 789	18	39.6611	1.47213	1.67799	0.905108	0.907452	0.240247	12.035	0.433662	12.8828	0.626673	0.460759	0.157695	0.068186	0.0777313	6.77747	0.276881	2.60374	0.399206	0.0980267	0.0831165	0.0721593	0.0628355	0	0	0	0
Sol 789	19	44.8355	1.61599	0	0	0.800296	0.224173	18.3497	0.651558	13.9503	0.671466	0.272834	0.225907	0	0	7.68562	0.299291	1.95791	0.362062	0.00199865	0.0107427	0.201473	0.135922	0	0	0	0
Sol 789	20	48.8962	2.4838	0	0	0.5931	0.180878	9.7656	0.4915	10.9212	0.7669	0.2112	0.1991	0	0	5.2648	0.2942	1.8955	0.5044	0.039	0.0666	0.0591392	0.0525716	0	0	0	0
Sol 789	21	47.5853	1.74225	1.31245	1.13583	0.849782	0.230306	12.9392	0.464646	15.1738	0.707501	0.644755	0.161045	0.0104506	0.0313013	5.15289	0.24829	2.65006	0.400604	0.129319	0.102127	0.112231	0.0911601	0	0	0.0256556	0.0393033
Sol 789	22	51.1526	1.86468	1.03642	0.873873	1.07593	0.272548	18.0389	0.641768	16.492	0.761596	0.684199	0.169503	0	0	3.6677	0.376008	2.83441	0.401832	0.173245	0.124909	0.172682	0.124437	0	0	0.038198	0.0434656
Sol 789	23	44.4416	1.68826	0	0	1.15293	0.28608	25.1597	0.923762	16.358	0.79523	0.559675	0.161846	0.0372465	0.0520863	5.01792	0.296737	2.75228	0.394082	0.118838	0.0974181	0.296993	0.15873	0	0	0	0
Sol 789	24	26.6776	1.03591	0.102405	0.921499	0.987963	0.260432	22.3492	0.814941	15.0162	0.762888	0.39528	0.156007	0.0966483	0.0978163	4.82283	0.571003	2.39598	0.387526	0.0452027	0.0603307	0.271369	0.15882	0.0946333	0.0821974	0	0
Sol 789	25	26.8613	1.01109	0.470462	0.979412	1.07088	0.273765	28.0018	1.01971	16.182	0.802816	0.521551	0.157787	0.0330826	0.0480087	7.38073	0.310787	2.512	0.476707	0.0437581	0.0481134	0.415438	0.151239	0	0	0	0
Sol 789	26	31.854	1.20786	0	0	0.964671	0.257983	29.0808	1.05625	16.4124	0.822361	0.520372	0.172884	0.0664088	0.0778272	7.09545	0.29448	2.96822	0.401014	0.0258646	0.0370049	0.351291	0.2146	0	0	0	0
Sol 789	27	18.7558	0.709851	1.24432	1.54972	1.14658	0.285302	38.6856	1.37869	15.6637	0.7949	0.398343	0.262385	0.0243957	0.0398554	6.34225	0.266666	3.16433	0.385445	0	0	0.447159	0.149	0	0	0	0
Sol 789	28	17.6577	0.65982	1.75746	1.53751	1.20459	0.296145	37.6063	1.33305	16.0956	0.795651	0.33694	0.16373	0	0	6.15402	0.242006	3.08851	0.400447	0	0	0.403327	0.158225	0	0	0	0
Sol 789	29	17.1847	0.907	1.1882	2.0243	0.7403	0.3035	31.3962	1.14371	18.4344	1.2283	0.399464	0.156756	0	0	7.01066	0.277149	1.7529	0.4836	0	0	0.3756	0.2294	0	0	0	0
Sol 789	30	19.945	1.08354	0.702367	0.962857	1.86744	0.374508	26.7169	0.947872	12.807	0.950153	0.6047	0.152287	0.0607628	0.0718445	7.99169	0.310103	2.1721	0.537844	0	0	0.28737	0.159628	0	0	0	0
Sol 789	31	18.1077	0.978723	3.35458	1.59357	1.5177	0.483395	35.6471	1.26757	14.3605	0.735977	0.450757	0.148675	0.043331	0.0566681	6.8964	0.388817	2.8011	0.5721	0	0	0.467212	0.157256	0	0	0	0
Sol 789	32	16.4655	0.620701	2.03702	1.09377	1.5092	0.337147	38.2746	1.36948	14.1356	0.726184	0.466817	0.141769	0	0	4.78359	0.236704	2.60824	0.398412	0	0	0.522822	0.139812	0	0	0	0
Sol 789	33	19.6915	0.799892	0.426412	1.03706	1.53135	0.346959	36.9749	1.40725	16.8105	0.884917	0.578145	0.188899	0.208442	0.125038	4.89011	0.275185	2.03712	0.467713	0	0	0.599282	0.190262	0	0	0	0
Sol 789	34	17.8731	0.736155	0.490775	1.11	1.25231	0.305102	33.713	1.28246	13.7975	0.79598	0.220551	0.226256	0.0481794	0.0625677	8.14594	0.371901	2.61177	0.370127	0	0	0.423798	0.145558	0	0	0	0
Sol 789	35	28.5394	1.20382	0.57914	1.04616	1.01449	0.268342	32.7972	1.25431	17.2977	0.900189	0.434682	0.156538	0.0159922	0.0405932	6.80244	0.399817	3.06726	0.351527	0	0	0.308526	0.130041	0	0	0	0
Sol 789	36	28.6047	1.20958	0.211255	1.13685	1.06822	0.286474	28.4755	1.50531	17.0959	0.862013	0.568937	0.185826	0.0232601	0.0459191	7.20068	0.410907	2.59068	0.420578	0	0	0.350112	0.154603	0	0	0	0
Sol 789	37	16.8712	0.640681	0.802192	1.44997	1.06377	0.273934	38.2917	1.35852	18.0393	0.861113	0.548485	0.159261	0	0	11.5114	0.441075	2.27478	0.385531	0	0	0.395406	0.189712	0	0	0	0
Sol 789	38	19.2502	0.714311	0.314483	1.39839	0.996124	0.260502	35.5191	1.79576	18.979	0.883882	0.3184	0.23151	0.0356263	0.0486726	10.971	0.421555	2.6807	0.401204	0	0	0.3303	0.23181	0	0	0	0
Sol 789	39	21.6433	0.799928	0.173481	0.934077	0.969146	0.256411	34.3698	1.22117	19.7505	0.909257	0.357878	0.148191	0.0156764	0.0377328	6.3823	0.251	2.41207	0.392136	0	0	0.713824	0.175504	0	0	0	0
Sol 789	40	26.3825	0.965446	1.7862	2.0019	1.18008	0.290964	31.8163	1.13039	17.6719	0.831854	0.3052	0.2299	0.00390265	0.0258176	8.5046	0.4647	2.4303	0.5559	0	0	0.879817	0.209815	0	0	0	0
Sol 789	41	26.3185	1.00832	1.1619	1.1166	1.62191	0.333933	11.6074	0.595304	13.5705	0.702049	0.284895	0.272225	0.079341	0.0848966	11.1529	0.618977	2.07176	0.610799	0.122516	0.14747	0.152344	0.174651	0	0	0	0
Sol 789	42	39.3118	1.50001	0.395034	0.829999	3.58402	0.359566	11.7605	0.44237	16.6293	0.788514	0.0810803	0.102442	0	0	5.11351	0.350403	3.21283	0.389114	0	0	0.0439754	0.0504391	0	0	0.206784	0.137724
Sol 789	43	34.1601	1.25276	0.126907	0.804921	3.28783	0.40236	13.6284	0.486899	15.3162	0.720305	0.519053	0.134075	0.0591287	0.0707841	5.09296	0.253566	3.47651	0.384601	0	0	0.0482023	0.0478692	0	0	0.093259	0.0786216
Sol 789	44	19.2572	0.723671	0.111786	1.10207	1.38101	0.322243	39.1216	1.98472	17.5189	0.843363	0.534567	0.191955	0	0	5.49386	0.30802	2.9789	0.538982	0	0	0.513034	0.146849	0	0	0	0
Sol 789	45	28.1743	1.49327	0	0	1.11896	0.282486	34.4154	1.22193	17.6881	0.833975	0.936683	0.22065	0.015692	0.0431666	7.13876	0.278404	2.37257	0.390407	0	0	0.501605	0.179779	0	0	0	0
Sol 789	46	33.3712	1.71701	1.83628	0.989882	0.912497	0.245232	35.1243	1.24493	19.2675	0.884048	0.720741	0.250711	0	0	4.56373	0.271131	1.87814	0.354406	0	0	0.614833	0.217912	0	0	0	0
Sol 789	47	33.6604	1.24771	0	0	1.1921	0.293633	32.5102	1.643	19.3837	0.896772	0.640395	0.169931	0	0	4.49844	0.29474	1.88849	0.48068	0	0	0.805208	0.194385	0	0	0	0
Sol 789	48	32.4016	1.17603	1.28342	1.18435	1.76442	0.363864	16.3413	0.580439	15.3425	0.721062	0.237301	0.145843	0.0155213	0.0359336	6.0239	0.239094	2.7377	0.561344	0.0603582	0.0550345	0.202126	0.135766	0	0	0	0
Sol 789	49	36.3795	1.3252	0.892393	0.958014	1.52928	0.340119	19.4965	0.695818	17.8875	0.816581	0.171916	0.124175	0.0286965	0.0429959	6.94285	0.271952	3.07732	0.400261	0.0636368	0.0613056	0.137796	0.106058	0	0	0	0
Sol 789	50	29.3943	1.0726	1.00779	1.02721	1.2892	0.306503	34.2776	1.21509	18.6975	0.867624	0.222988	0.206974	0	0	6.05293	0.23734	2.91297	0.399352	0	0	0.350321	0.226945	0	0	0	0
Sol 789	51	25.9633	0.967748	1.16567	1.7405	1.18244	0.292137	32.7895	1.17972	18.7068	0.893045	0.896833	0.21693	0.0118392	0.0355176	7.16061	0.299974	2.71747	0.459972	0	0	0.50236	0.180143	0	0	0	0
Sol 789	52	25.8548	0.964609	1.58542	2.03854	1.13454	0.285314	38.3915	1.36762	18.477	0.896484	0.561438	0.149565	0.0588718	0.0701246	4.66856	0.291802	3.12709	0.522675	0	0	0.496182	0.151002	0	0	0	0
Sol 789	53	21.9779	0.842985	0.437251	1.43307	1.37895	0.322137	38.7753	1.41184	17.7226	0.879288	0.474207	0.157672	0	0	6.16317	0.256105	3.05101	0.495468	0	0	0.574503	0.169774	0	0	0	0
Sol 789	54	38.5156	1.44265	0.808849	0.943819	3.15551	0.423854	20.5508	1.0374	16.737	0.798294	0.627682	0.15842	0.0373427	0.0528526	5.49009	0.285728	2.8021	0.4045	0.000768047	0.0102406	0.226476	0.144733	0	0	0.0212293	0.0342345
Sol 789	55	41.9344	1.5944	0.693387	0.838483	2.77034	0.425143	17.1839	0.626147	16.7553	0.799239	0.302424	0.158798	0.144275	0.115887	4.67696	0.282126	2.95676	0.40216	0	0	0.267235	0.152829	0	0	0.170863	0.123791
Sol 789	56	39.97	1.47064	0	0	2.72031	0.415921	18.2115	0.652671	17.4597	0.80409	0.489135	0.135571	0.0662338	0.0736315	4.38931	0.298189	3.19189	0.386624	0	0	0.612267	0.154169	0.31682	0.163019	0.145557	0.110879
Sol 789	57	41.3199	1.51922	0.346128	0.824686	2.68399	0.409106	18.4866	0.659471	17.2685	0.796187	0.184597	0.129271	0.140607	0.113831	4.19634	0.31731	3.11973	0.393277	0.0103362	0.0250967	0.252382	0.152768	0.211713	0.139273	0.013352	0.0288122
Sol 789	58	38.0421	1.43813	1.22572	1.25206	1.87961	0.355387	20.4234	0.73937	16.2553	0.789347	0.339436	0.126897	0.15935	0.121962	4.76561	0.33212	2.89213	0.374679	0.0276199	0.0361791	0.246092	0.152214	0	0	0	0
Sol 789	59	40.4073	1.58203	0.544747	0.834081	2.10101	0.381166	18.4965	0.690588	16.7782	0.841585	0.257744	0.140473	0.116697	0.108288	5.0661	0.332142	2.80908	0.38655	0.0445623	0.0519498	0.220283	0.140487	0	0	0.0369843	0.0458481
Sol 789	60	37.5683	1.9673	0.592965	0.883712	1.89747	0.362486	17.9132	0.643943	14.2569	0.977459	0.172927	0.124757	0.10666	0.0994294	5.04553	0.238049	2.62669	0.388327	0.0653061	0.0586874	0.340188	0.159048	0	0	0	0
Sol 789	61	46.527	1.72272	0.930349	0.916451	1.6695	0.355428	17.4199	0.883681	17.8077	0.825007	0.16623	0.122439	0.161102	0.124734	4.42428	0.264904	3.03897	0.492889	0.111282	0.125419	0.411226	0.181889	0.000670709	0.00608797	0.0539792	0.0589002
Sol 789	62	41.6814	1.55432	0.131723	0.782369	2.01568	0.388099	19.2189	0.691629	16.2607	0.772685	0.205762	0.138981	0.167799	0.123344	4.81087	0.262601	2.99878	0.396387	0.0414152	0.0475226	0.361774	0.1594	0	0	0.0344571	0.0429605
Sol 789	63	41.89	1.54668	1.87677	1.30507	1.77779	0.360721	21.4469	1.08333	16.1719	0.766158	0.251122	0.144783	0.0958255	0.0965408	4.1567	0.33425	3.39974	0.388971	0.0075854	0.0212699	0.455205	0.165403	0	0	0.00953306	0.0237302
Sol 789	64	44.9917	1.6428	0	0	2.41163	0.413127	20.1195	0.720595	16.9351	0.788042	0.16991	0.123569	0.0807283	0.0853492	3.33467	0.39445	3.20086	0.396166	0.0308747	0.0380743	0.283555	0.160141	0.0261897	0.0378362	0	0
Sol 789	65	43.0511	1.5794	0.389964	0.824987	3.35769	0.415372	19.7292	0.705971	16.4849	0.774135	0.123333	0.0983508	0.126937	0.108571	3.4084	0.391781	3.27857	0.394846	0	0	0.192372	0.133026	0.515331	0.138392	0.123474	0.100154
Sol 789	66	44.049	1.629	1.002	0.940681	3.24906	0.398315	19.5803	0.702866	16.9382	0.787971	0.182338	0.129413	0.0653664	0.0755614	3.3593	0.39484	3.36422	0.384996	0	0	0.248274	0.149802	0	0	0.0694042	0.0636695
Sol 789	67	40.8615	1.49145	0	0	2.80989	0.414722	20.2348	0.719635	15.9803	0.753864	0.375785	0.15997	0.0703513	0.0703177	3.77775	0.362373	3.08488	0.3994	0	0	0.107979	0.0879966	0	0	0.0141992	0.0296528
Sol 789	68	24.7695	0.91856	0.600747	0.984688	1.62319	0.349907	29.9906	1.07688	15.2523	0.75547	0.341249	0.270351	0.0926636	0.0951307	4.01168	0.663357	2.80723	0.483505	0	0	0.34876	0.156485	0	0	0	0
Sol 789	69	17.4088	0.651413	2.29407	2.01447	1.26069	0.299611	41.9002	1.48725	19.9348	0.931483	0.433851	0.225487	0	0	3.19381	0.398255	2.53569	0.54926	0	0	0.556254	0.140926	0	0	0	0
Sol 789	70	18.3715	0.987855	0.708442	1.13052	1.03898	0.267128	40.3058	1.42944	20.1973	0.936042	0.5164	0.187285	0.0161107	0.037692	4.66166	0.261616	2.12412	0.549083	0	0	0.698842	0.182805	0	0	0	0
Sol 789	71	17.0717	0.638266	2.19242	1.28079	1.14555	0.281904	38.1119	1.95426	17.8303	1.23554	0.331785	0.214796	0	0	5.46054	0.310627	2.2651	0.572532	0	0	0.369963	0.252072	0	0	0	0
Sol 789	72	26.896	1.39693	2.24473	1.57174	1.15501	0.292802	35.3231	1.30343	19.1261	0.929186	0.5975	0.213118	0.0477746	0.0604109	11.4083	0.456342	3.01811	0.413435	0	0	0.466906	0.162499	0	0	0	0
Sol 789	73	25.2866	0.925665	0	0	1.17867	0.288787	30.4816	1.08074	15.8321	0.759293	0.437241	0.149606	0	0	10.8509	0.417206	3.13844	0.398963	0	0	0.34016	0.159709	0	0	0	0
Sol 789	74	46.9203	1.74292	0.515553	0.864648	0.969753	0.260739	29.1043	1.07575	14.4385	0.746452	0.782498	0.19428	0	0	5.31601	0.328665	2.1097	0.373845	0.00205364	0.0116031	0.739523	0.184642	0	0	0	0
Sol 789	75	57.2943	2.10404	0.454292	0.797582	1.02451	0.262014	24.4476	0.87652	13.1739	0.65767	1.51248	0.310923	0	0	5.47006	0.215926	2.10645	0.37429	0.00602484	0.0180746	0.760719	0.185151	0	0	0	0
Sol 789	76	46.0265	1.66849	0.234433	0.896028	1.07977	0.274932	29.7247	1.05637	15.3937	0.739595	1.14736	0.257476	0.0286149	0.0430233	4.86006	0.273679	1.97672	0.364297	0	0	0.689804	0.238373	0	0	0	0
Sol 789	77	25.1303	0.926688	0.39154	1.44372	0.937402	0.249962	39.1402	1.98179	17.265	0.827932	0.729677	0.178871	0	0	5.34923	0.21097	2.7811	0.403702	0	0	0.574203	0.152975	0	0	0	0
Sol 789	78	27.7334	1.03793	0.569065	0.933782	1.29823	0.303546	29.9445	1.06625	16.3791	0.780015	0.629969	0.15789	0	0	5.28128	0.209376	2.71759	0.402904	0	0	0.311555	0.162274	0	0	0	0
Sol 789	79	18.2235	1.02917	0	0	1.65507	0.354635	28.278	1.01413	18.0236	1.20433	0.396737	0.146767	0	0	3.89199	0.358412	1.73058	0.442059	0	0	0.359637	0.164302	0	0	0.0153632	0.0308773
Sol 789	80	22.9876	0.848644	0.947064	1.2849	1.44824	0.3278	21.8879	1.11833	15.2518	1.03428	0.308086	0.218495	0	0	6.35861	0.248479	2.05751	0.370521	0	0	0.235537	0.148566	0	0	0	0
Sol 789	81	36.0998	1.31668	0	0	1.83408	0.374976	21.468	0.762841	16.0812	0.751755	0.226993	0.145336	0.00691723	0.0279676	6.9235	0.393374	3.06808	0.399204	0.0101538	0.0255964	0.182291	0.128742	0	0	0.0284773	0.0364293
Sol 789	82	33.0236	1.69621	1.54364	1.36054	0.952776	0.253654	27.9933	0.994358	17.7463	0.82306	0.270989	0.157615	0.0357315	0.0498574	6.30733	0.246956	3.2942	0.392507	0	0	0.380313	0.160986	0	0	0	0
Sol 789	83	27.193	0.994425	1.6276	1.4604	1.25099	0.30074	35.9655	1.27457	17.0427	0.812774	0.349392	0.231508	0.0360071	0.0496598	6.95606	0.270906	3.65409	0.372195	0.0319878	0.0429866	0.580667	0.146344	0	0	0	0
Sol 789	84	14.65	0.7813	0	0	0.5652	0.2597	45.5272	1.61367	15.1441	0.771074	0.385	0.2286	0.0475926	0.0607771	6.3155	0.349	3.95145	0.34501	0	0	0.763783	0.185461	0	0	0	0
Sol 789	85	21.4987	0.806601	1.4931	1.13657	1.03319	0.26858	36.2321	1.28784	14.9238	0.751165	0.379881	0.157496	0.00708061	0.030532	7.54757	0.302607	3.23103	0.393078	0	0	0.511529	0.136952	0	0	0	0
Sol 789	86	28.4729	1.0992	0.223493	0.976417	1.20181	0.296681	29.5921	1.09198	16.7697	0.821362	0.369319	0.145299	0	0	7.08246	0.298122	2.6538	0.378841	0.0203705	0.0341706	0.445742	0.151264	0	0	0	0
Sol 789	87	20.8944	0.842619	3.43898	1.53648	1.05024	0.27592	33.9492	1.24567	16.7749	0.877083	0.338835	0.138631	0	0	6.3079	0.353032	2.55876	0.374724	0	0	0.398572	0.167456	0	0	0	0
Sol 789	88	17.769	0.690784	0.729232	1.43957	1.08187	0.27461	32.9191	1.67564	16.4306	0.810442	0.343365	0.158256	0	0	6.0668	0.241794	2.1941	0.508527	0	0	0.610569	0.178472	0	0	0	0
Sol 789	89	18.5024	0.7182	1.03729	1.52006	1.39476	0.321332	42.6434	2.1555	15.3857	0.825774	0.493713	0.166697	0.0502344	0.0641091	4.67129	0.321166	2.43645	0.400223	0	0	0.85895	0.285655	0	0	0	0
Sol 789	90	28.6576	1.13795	1.82823	1.45751	2.23152	0.37857	29.3404	1.07348	15.4394	0.783026	0.522262	0.164866	0.0979686	0.0999536	5.93509	0.297119	2.99209	0.402745	0	0	0.271035	0.145061	0	0	0.1789	0.119422
Sol 789	91	41.677	1.69079	0.632108	1.29022	1.99535	0.384045	19.8112	0.755558	16.5577	0.857176	0.277259	0.152782	0.02314	0.0438109	5.78524	0.325578	3.12166	0.391883	0.0671864	0.0689289	0.141511	0.111099	0	0	0.45088	0.157292
Sol 789	92	38.2235	1.7577	0.0364986	0.76997	1.63211	0.356723	16.2082	0.672593	15.2802	0.955916	0.23209	0.146583	0	0	5.14645	0.379122	2.78319	0.354905	0.120894	0.107341	0.122013	0.105394	0	0	0.206418	0.125662
Sol 789	93	30.5483	2.13835	0	0	2.39115	0.628962	21.5013	0.990417	14.4633	1.83078	0.434584	0.153312	0.126211	0.130447	6.62856	0.49978	2.87573	0.46994	0.0079896	0.0247926	0.163101	0.141476	0	0	0.231686	0.205652
Sol 789	94	28.1025	1.26369	0.843137	1.23754	1.31385	0.369524	39.2785	1.98242	17.2805	1.22866	0.556829	0.183461	0.0455832	0.062958	6.2958	0.446133	3.01651	0.408975	0	0	0.507563	0.182153	0	0	0	0
Sol 789	95	22.1043	0.981946	0.491373	1.07282	0.791972	0.230171	39.9094	1.47416	17.7788	0.999089	0.476825	0.163011	0	0	4.93304	0.363545	2.72414	0.381222	0	0	0.55154	0.176926	0	0	0	0
Sol 789	96	15.202	0.664088	0	0	0.796078	0.237656	43.0314	1.58186	16.2788	0.930337	0.579663	0.175553	0.0729438	0.083278	4.71368	0.353718	2.56976	0.459581	0	0	0.644967	0.191546	0	0	0	0
Sol 789	97	16.1739	0.633966	1.82985	1.21308	1.18411	0.291199	40.426	1.44896	16.0015	0.8324	0.470594	0.153068	0.0408519	0.0548259	4.85102	0.318934	3.19894	0.709523	0	0	0.454553	0.155829	0	0	0	0
Sol 789	98	28.5448	1.06966	0.591657	0.962749	1.30082	0.302357	29.3713	1.04989	14.5353	0.737475	0.643753	0.162211	0	0	7.70691	0.300837	2.69214	0.607686	0	0	0.347637	0.160105	0	0	0	0
Sol 789	99	29.8749	1.57056	1.3113	1.33858	1.18688	0.289512	29.0598	1.03351	13.831	0.984051	0.553279	0.140971	0	0	7.76433	0.433396	2.54077	0.553134	0	0	0.415613	0.148785	0	0	0	0
Sol 789	100	26.0434	1.02577	0.663551	1.00231	1.13628	0.287034	25.624	0.965971	14.1754	0.785551	0.581719	0.190106	0.0700279	0.0811786	8.15828	0.416651	2.23364	0.385156	0.00704294	0.020504	0.425203	0.155801	0	0	0	0
Sol 789	101	36.0893	1.32567	0.346828	0.759856	0.798695	0.222955	29.4455	1.05755	14.8365	1.05179	0.328656	0.258338	0	0	8.27593	0.458248	1.38211	0.433573	0	0	0.452709	0.153379	0	0	0	0
Sol 789	102	51.9482	2.65965	0.060838	0.782342	0.720515	0.206981	17.7792	0.899622	13.4992	0.657911	0.356125	0.145122	0.0160154	0.0391375	6.77299	0.27447	1.96761	0.484684	0	0	0.2081	0.196904	0	0	0	0
Sol 789	103	52.9493	1.93466	0	0	0.712731	0.204246	13.9587	0.511671	11.8492	0.598	0.39607	0.265512	0.0454146	0.0600607	4.91566	0.501463	2.61013	0.399528	0.0654586	0.0648913	0.129234	0.101785	0	0	0	0
Sol 789	104	53.63	1.92572	0	0	0.856583	0.231663	13.599	0.483148	12.746	0.612255	0.138372	0.150889	0	0	3.4903	0.54116	2.96932	0.401967	0.00359501	0.0135812	0.0864296	0.074152	0.230777	0.207709	0.000499164	0.0076372
Sol 789	105	43.4651	1.57305	0	0	0.688604	0.201217	23.2392	1.17521	12.649	0.631175	0.205341	0.138271	0	0	4.49883	0.281502	2.92137	0.398863	0	0	0.207713	0.13933	0.0316489	0.0604474	0	0
Sol 789	106	44.3773	1.59793	0.610818	0.837995	0.8304	0.22458	18.1351	0.644275	10.3983	0.541604	0.333713	0.16443	0.0255866	0.0396066	5.75555	0.240054	2.6406	0.399803	0.000250241	0.00905874	0.156241	0.11616	0	0	0	0
Sol 789	107	50.9728	1.90811	1.68331	1.1496	0.580951	0.210412	12.8553	0.478352	11.2421	0.596387	0.305661	0.151751	0.0261631	0.0490448	7.34587	0.311993	1.79722	0.347597	0.0097704	0.0246321	0.108375	0.0893589	0	0	0.00821782	0.0211907
Sol 789	108	62.0658	2.23815	0.254063	0.658287	0.40803	0.171048	7.12227	0.255487	7.1119	0.590368	0.112157	0.131644	0.0411706	0.0578345	4.93044	0.27325	1.39468	0.296199	0.0115137	0.0264087	0.0492428	0.0511646	0	0	0.01927	0.0329366
Sol 789	109	73.207	2.62737	0	0	0.214614	0.124016	5.71537	0.206845	5.88828	0.355816	0.0504498	0.0543291	0	0	2.97757	0.396975	1.21022	0.269148	0.0113404	0.0250259	0.0298926	0.0353418	0	0	0.00898689	0.0220907
Sol 789	110	65.4865	2.39159	0	0	0.143952	0.140899	12.0365	0.449681	7.87539	0.437812	0.175963	0.124123	0	0	3.9239	0.5004	1.7397	0.481847	0	0	0.140315	0.10833	0	0	0	0
Sol 789	111	30.8033	1.1474	0	0	0.400028	0.193641	36.8283	1.31614	17.8997	0.866404	0.399521	0.269551	0	0	2.59427	0.517517	1.98219	0.363618	0	0	0.424957	0.179888	0.0265073	0.0339079	0	0
Sol 789	112	31.877	1.17212	0	0	0.311994	0.187343	33.7881	1.20636	19.0548	0.885342	0.642332	0.229349	0	0	2.39291	0.391596	1.1231	0.370446	0	0	0.599345	0.158207	0	0	0	0
Sol 789	113	49.0669	2.52981	0.394729	0.766621	0.323988	0.185055	17.8742	0.636192	16.846	0.764849	0.3473	0.232219	0	0	3.48274	0.38937	1.00764	0.336073	0	0	0.258483	0.152907	0	0	0	0
Sol 789	114	37.7462	1.36992	0.0441558	0.757808	0.451333	0.177045	25.2531	0.897357	24.0638	1.03212	0.159304	0.118097	0	0	4.46452	0.286636	1.02658	0.331265	0	0	0.347492	0.162985	0	0	0	0
Sol 789	115	41.891	1.58236	0.447877	0.784462	0.439396	0.189019	22.9575	0.85638	22.4176	1.01669	0.138835	0.110073	0	0	4.92728	0.351811	1.00579	0.237427	0	0	0.305782	0.150323	0.047061	0.0557273	0	0
Sol 789	116	42.835	1.58573	0	0	0.714317	0.20575	18.6804	0.675213	19.2452	0.872748	0.00483193	0.0240358	0.0445447	0.0574206	4.19697	0.686252	1.1161	0.253277	0	0	0.190962	0.126392	1.58029	0.446408	0.245826	0.202221
Sol 789	117	43.8321	1.60208	0.387661	0.323555	1.04157	0.245313	18.8477	0.956922	17.9878	0.699287	0.228686	0.143951	0.0983231	0.0835064	5.46303	0.281839	1.37327	0.400557	0.0157028	0.0305334	0.3184	0.230516	3.553	0.532138	0.8981	0.299035
Sol 789	118	37.2316	1.36023	0.364769	0.887382	1.40219	0.319956	25.16	0.897728	13.7621	0.679711	0.255011	0.227469	0	0	5.7944	0.228298	1.64113	0.328121	0	0	0.068525	0.0701927	14.7929	0.527483	2.76827	0.399326
Sol 789	119	36.393	1.8331	1.00109	0.545773	1.25985	0.278691	27.3669	1.3696	13.0597	0.7291	0.2036	0.1943	0.113755	0.0924068	4.9306	0.2867	1.9353	0.5062	0	0	0.2491	0.2153	11.7732	0.417486	2.5627	0.5588
Sol 789	120	41.9331	1.54169	1.34546	0.910763	0.620533	0.189008	25.9075	0.934966	14.0624	0.699012	0.302267	0.158909	0.0298223	0.0444784	6.10815	0.258315	2.86762	0.406237	0	0	0.372781	0.140624	0.189678	0.185074	0	0
Sol 789	121	30.047	1.5466	0.761561	0.930278	0.595911	0.183265	30.9673	1.5524	16.9405	0.798768	0.864	0.2911	0.0134683	0.0346471	6.697	0.369	2.55523	0.396796	0	0	0.457838	0.143734	0	0	0	0
Sol 789	122	27.9348	1.50813	0.885472	1.65291	0.63628	0.190716	25.9115	1.36556	13.4611	0.95669	0.720059	0.177595	0	0	3.71866	0.482484	1.46167	0.426034	0	0	0.329882	0.221194	0	0	0	0
Sol 789	123	19.5523	0.732273	1.76661	2.23268	0.571702	0.188597	38.8679	1.37935	22.3883	1.01523	0.784527	0.266768	0	0	4.00547	0.347637	1.49356	0.449325	0	0	0.551838	0.140263	0	0	0	0
Sol 789	124	17.8307	0.678901	0.818734	1.12147	0.530142	0.177362	47.1888	1.67379	19.108	0.9278	0.389178	0.160843	0.0168469	0.0385931	4.12356	0.332682	3.92177	0.341521	0	0	0.553708	0.140623	0	0	0	0
Sol 789	125	37.9401	1.40772	0.920672	1.05713	0.598198	0.20834	37.4335	1.89846	12.1893	0.64939	0.404928	0.160973	0	0	4.71077	0.265549	3.94981	0.361288	0	0	0.504159	0.18024	0	0	0	0
Sol 789	126	64.6501	3.2714	0	0	0.228895	0.169569	12.6654	0.6365	8.52583	0.46249	0.225252	0.146922	0.0369757	0.0545056	4.2236	0.4513	2.5738	0.5635	0	0	0.143	0.1541	0	0	0	0
Sol 789	127	62.1271	2.22565	0	0	0.282314	0.139142	9.55198	0.340567	8.23181	0.45204	0.196652	0.134689	0.0776674	0.0841969	5.35329	0.211966	1.76898	0.343701	0	0	0.0829814	0.0704914	0	0	0	0
Sol 789	128	49.6113	1.82459	0.0744009	0.713097	0.549086	0.188412	11.3885	0.413349	11.1491	0.568376	0.235461	0.138055	0.0168711	0.0376204	6.36466	0.255859	1.96734	0.363361	0	0	0.0850542	0.0724924	0	0	0	0
Sol 789	129	53.3093	1.91223	0.0725147	0.735656	0.594175	0.177616	11.6788	0.590715	9.50406	0.495057	0.176448	0.178443	0.0780501	0.0836225	4.85143	0.312023	2.45147	0.393657	0.0348815	0.0410345	0.0734147	0.0641622	0	0	0.0604137	0.0678923
Sol 789	130	64.1691	2.31646	0.625193	0.751591	0.463842	0.184744	11.0277	0.396666	7.68346	0.429273	0.24063	0.149836	0.0555558	0.0661378	3.97815	0.349703	2.16294	0.378349	0.00326262	0.0126489	0.0903188	0.0758088	0	0	0.0193955	0.0328117
Sol 789	131	60.7043	2.19358	0.237988	0.720662	0.590037	0.193801	13.8095	0.493482	8.37055	0.458482	0.197204	0.135331	0	0	3.71661	0.369516	2.14326	0.373962	0	0	0.141965	0.156511	0	0	0.0354335	0.0438062
Sol 789	132	51.1609	2.64181	0.446085	0.808571	0.589664	0.212247	16.6808	0.594602	11.4556	0.575822	0.218093	0.139088	0.0420806	0.0558434	4.52549	0.285256	2.50652	0.541464	0.00256648	0.0117253	0.2509	0.215812	0	0	0	0
Sol 789	133	43.2596	1.57823	0	0	0.994038	0.257275	25.6042	0.928448	13.533	0.667835	0.262923	0.142173	0	0	4.41716	0.305614	2.89163	0.403278	0.0175632	0.0325898	0.457109	0.146599	0	0	0	0
Sol 789	134	39.1443	2.07499	0	0	0.785014	0.217519	27.2659	0.966793	13.2072	0.943838	0.4209	0.21968	0	0	5.364	0.308457	2.2098	0.539795	0	0	0.399655	0.159015	0	0	0	0
Sol 789	135	40.5015	1.60201	1.59793	1.03067	1.66483	0.363006	25.8905	1.00799	15.0252	0.856773	0.727253	0.210591	0.0331392	0.0488312	7.21992	0.41451	2.36084	0.333907	0.0441586	0.053844	0.392216	0.143722	0	0	0.0167147	0.0330047
Sol 789	136	29.0572	1.4974	1.35315	1.04478	1.56763	0.353726	27.1683	1.3623	15.9586	0.808849	0.8281	0.2811	0.0513714	0.0651703	10.7168	0.5816	2.4797	0.559	0.0178	0.0465	0.3049	0.2294	0	0	0	0
Sol 789	137	26.6154	0.978003	1.04008	0.984089	0.905931	0.241779	30.0421	1.06582	15.029	0.73626	0.584047	0.147775	0	0	6.92554	0.270096	2.85944	0.398902	0	0	0.23695	0.207421	0	0	0.0609626	0.0550217
Sol 789	138	14.2555	0.557567	3.237	1.53907	0.762844	0.253234	43.9798	2.22497	19.4748	0.938656	0.453019	0.15454	0	0	3.39478	0.396179	2.355	0.619935	0	0	0.589801	0.208384	0	0	0	0
Sol 789	139	10.4681	0.420714	1.15162	1.47228	0.737971	0.236946	44.6485	1.6067	17.1644	0.889889	0.531257	0.168199	0	0	3.63816	0.35737	2.49256	0.38767	0	0	0.545291	0.16885	0	0	0	0
Sol 789	140	13.7051	0.541221	1.00574	1.53209	0.706185	0.209179	43.7519	1.56091	16.9098	0.879942	0.4289	0.152099	0	0	3.72871	0.347723	2.76292	0.381765	0	0	0.64921	0.18052	0	0	0	0
Sol 789	141	20.5657	0.869719	0.572729	1.49741	0.938429	0.259257	39.7867	1.46406	14.7236	0.837469	0.361387	0.133058	0	0	4.44937	0.339522	3.45683	0.355739	0	0	0.521012	0.166928	0	0	0	0
Sol 789	142	24.2155	1.41171	1.92886	1.58102	1.92296	0.469711	25.495	1.04503	14.752	1.31216	0.554389	0.182706	0.190765	0.135212	6.55616	0.487474	3.06688	0.380632	0.0528996	0.0640482	0.241568	0.151661	0	0	0.185562	0.135335
Sol 789	143	39.4259	2.44305	0.234007	1.12443	2.32421	0.607155	16.4327	0.810967	15.278	2.18654	0.238196	0.150708	0.109813	0.121742	5.15358	0.436909	2.84332	0.374919	0.0980375	0.106098	0.121221	0.121297	0	0	0.279946	0.145946
Sol 789	144	42.0537	1.86095	0.601474	0.958938	1.39618	0.328007	19.0035	0.746406	16.1337	0.908253	0.234446	0.130091	0.0912712	0.0968844	4.16673	0.348966	3.17405	0.356716	0.075843	0.0813775	0.131741	0.107052	0	0	0.396914	0.134433
Sol 789	145	41.3567	1.69311	0	0	1.78885	0.352156	20.6476	0.777914	17.2238	0.884331	0.845627	0.208429	0.0554098	0.0634284	5.62738	0.293719	3.50945	0.376907	0.034473	0.0458082	0.139629	0.109996	0.000314596	0.00644923	0.522443	0.17464
Sol 789	146	25.0368	1.30275	0.336254	0.874539	1.4248	0.469272	26.6601	0.946789	13.2662	0.972076	0.742001	0.181786	0.0219978	0.0393354	5.45401	0.215482	2.56874	0.597522	0	0	0.238034	0.2015	0	0	0	0
Sol 789	147	26.9606	1.46211	0.648559	0.885629	1.04037	0.26461	26.4163	0.937426	14.7932	0.719617	0.31385	0.162355	0	0	6.30216	0.246474	2.35806	0.539872	0	0	0.311664	0.236154	0	0	0	0
Sol 789	148	32.8803	1.6902	0.456042	0.932813	1.00333	0.265054	33.812	1.6947	18.2932	0.872977	0.239935	0.152856	0	0	7.784	0.4271	3.0616	0.567	0.08055	0.0857335	0.3941	0.2262	0	0	0.0446004	0.0530642
Sol 789	149	21.7214	0.866658	0.687665	1.00804	0.89322	0.245937	38.7761	1.42395	18.6435	0.923948	0.496899	0.160197	0	0	5.32376	0.332537	2.47275	0.397684	0	0	0.542845	0.168288	0	0	0	0
Sol 789	150	18.5827	0.690894	1.45806	1.11694	1.15661	0.285824	38.8543	1.37797	16.3376	0.801107	0.48192	0.136191	0.0789921	0.0853267	5.70868	0.31766	2.89143	0.400778	0	0	0.53181	0.135525	0	0	0	0
Sol 789	151	14.2304	0.76803	0	0	0.710556	0.213166	55.3414	2.79313	15.5685	0.816719	0.473258	0.158376	0.0256821	0.0394928	9.5475	0.388257	3.76542	0.397521	0	0	0.861651	0.207292	0	0	0	0
Sol 789	152	13.1326	0.502355	0	0	0.65725	0.206364	53.3587	1.89655	15.739	0.80005	0.455078	0.146707	0	0	7.79107	0.307538	4.25586	0.314877	0	0	0.86029	0.20513	0	0	0	0
Sol 789	153	21.4074	0.798046	0	0	0.656949	0.204738	49.6074	1.76296	15.9155	0.797684	0.463927	0.145064	0.0396417	0.0541487	7.67768	0.298694	4.21005	0.319568	0	0	0.707139	0.174109	0	0	0	0
Sol 789	154	29.0622	1.12913	0.0559277	0.965654	1.04485	0.278737	33.1995	1.23145	14.4064	0.737316	0.361568	0.163299	0.00920272	0.0327266	6.26857	0.253205	3.55812	0.378888	0	0	0.323305	0.159757	0	0	0	0
Sol 789	155	32.725	1.46994	0.350936	0.917604	1.12678	0.300078	21.4262	1.10487	15.8287	0.877038	0.194783	0.173668	0.0507539	0.0654514	4.5597	0.364108	2.66753	0.384163	0	0	0.184011	0.132108	0	0	0.091158	0.0941863
Sol 789	156	27.8103	1.04705	0.677907	0.988484	0.801473	0.25174	35.427	1.78716	19.1345	0.894013	0.349066	0.204582	0	0	4.52499	0.320754	2.74521	0.680628	0	0	0.512064	0.153889	0	0	0	0
Sol 789	157	33.339	1.23876	0	0	0.95896	0.257963	33.7707	1.72016	16.4735	1.08832	0.392307	0.187636	0	0	4.23882	0.298243	2.90042	0.40677	0	0	0.417235	0.157083	0	0	0	0
Sol 789	158	30.57	1.17899	1.77531	1.00419	1.20057	0.292987	36.7146	1.3375	18.0819	0.866161	0.53456	0.190714	0	0	4.70272	0.282574	3.05818	0.401502	0	0	0.459783	0.158174	0	0	0	0
Sol 789	159	38.8052	1.40409	0.493575	0.935436	1.06111	0.270305	35.7316	1.26651	16.0161	0.768131	0.719218	0.176615	0.0168414	0.037745	4.8276	0.228105	2.52341	0.396618	0	0	0.702615	0.243671	0	0	0	0
Sol 789	160	56.6515	2.04501	0.237101	0.834698	1.11382	0.27802	26.3458	0.936184	15.1276	0.725149	1.22964	0.270787	0	0	5.11788	0.203186	2.36958	0.391382	0	0	0.769079	0.186477	0	0	0	0
Sol 789	161	47.2286	1.79606	0.741105	1.28163	0.980366	0.263974	25.6792	1.00768	14.701	0.785965	0.706252	0.180411	0	0	5.67902	0.376175	2.13683	0.374882	0.0164572	0.0332873	0.395307	0.148239	0	0	0	0
Sol 789	162	28.9519	1.09677	0	0	1.16244	0.28992	30.446	1.11566	16.6117	0.84364	0.503964	0.167641	0.0239323	0.0420509	9.08167	0.368054	2.85952	0.397937	0	0	0.319759	0.155866	0	0	0	0
Sol 789	163	33.6439	1.78235	1.72618	1.3682	1.94674	0.384249	26.6298	0.944745	16.5333	1.11967	0.278518	0.158495	0	0	8.71166	0.336509	3.572	0.379966	0	0	0.398851	0.158998	0	0	0	0
Sol 789	164	27.8126	1.0176	0	0	1.48007	0.330872	23.6348	1.20352	16.6154	0.781101	0.26771	0.211147	0	0	6.82026	0.381332	3.15438	0.398055	0	0	0.31996	0.246446	0	0	0	0
Sol 789	165	20.5442	0.776528	0.480253	1.0242	1.23313	0.301669	41.6649	2.1029	18.0672	0.870539	0.5719	0.204929	0.0139347	0.0376391	5.72275	0.272473	2.88502	0.412838	0	0	0.502161	0.164764	0	0	0	0
Sol 789	166	15.1235	0.575582	0	0	1.2231	0.294147	44.1629	1.57525	16.2093	0.807078	0.685957	0.172411	0.0706517	0.0795964	3.21705	0.400809	2.45666	0.587537	0	0	0.575927	0.165566	0	0	0	0
Sol 789	167	26.9868	0.987105	1.21587	1.75122	2.43287	0.414421	29.1654	1.03501	16.3626	0.783718	0.665959	0.165524	0.182877	0.132559	3.58571	0.57772	2.59461	0.544304	0	0	0.344224	0.163601	0	0	0.00620177	0.0180051
Sol 789	168	41.9584	1.51557	0.183188	0.923301	3.00316	0.42698	22.5544	0.800675	16.5617	0.770839	0.187091	0.130675	0.10497	0.0927062	3.61204	0.527815	3.58587	0.542605	0	0	0.131003	0.102215	0	0	0.134272	0.104434
Sol 789	169	41.0856	1.48658	0.503467	1.21742	2.99554	0.427929	22.5372	0.7996	16.1375	0.757184	0.192178	0.133076	0.153928	0.118632	4.03495	0.341616	3.47478	0.385193	0	0	0.0605188	0.0539207	0	0	0.166729	0.121726
Sol 789	170	43.2181	1.56543	0.220873	0.790851	3.37441	0.415721	19.8948	0.706825	17.3041	0.791203	0.355531	0.16158	0.054829	0.0623507	3.76088	0.367219	3.27823	0.392967	0	0	0.1547	0.115101	0.00609871	0.0167465	0.0994472	0.0826022
Sol 789	171	43.8591	1.58234	0.134416	0.823676	2.50346	0.419133	18.8518	0.669269	16.2827	0.750009	0.426261	0.15311	0.0238064	0.0395607	4.51544	0.279151	3.20851	0.397314	0	0	0.499848	0.137553	0.0396869	0.0445213	0.0387611	0.0438078
Sol 789	172	45.5734	1.65588	1.19476	1.20126	2.06141	0.392158	17.2517	0.613811	16.0936	0.748439	0.295807	0.160911	0.155972	0.120218	4.68569	0.253053	3.18305	0.396816	0.0739908	0.0656226	0.415819	0.154303	0	0	0.0378476	0.0428682
Sol 789	173	46.2275	1.67992	0.149201	0.790425	1.96111	0.376757	19.0489	0.67999	16.3676	0.768199	0.210158	0.136861	0.176748	0.126042	5.57459	0.220013	3.14114	0.394942	0.10141	0.0843947	0.348813	0.162835	0	0	0.0422414	0.0471617
Sol 789	174	42.567	1.58531	0.959126	0.936105	2.34336	0.394891	20.5756	0.742515	15.6185	0.74902	0.158497	0.117378	0.20575	0.140737	3.6567	0.377217	3.40189	0.379195	0.00942608	0.0231521	0.292328	0.160704	0	0	0.0180725	0.0326212
Sol 789	175	44.5518	1.64061	0.989935	0.905312	2.79354	0.41342	19.5214	0.696687	17.4533	0.815432	0.167311	0.121933	0.0915685	0.0833489	2.97045	0.402082	3.24378	0.392819	0.00840462	0.0226124	0.261643	0.154954	0.112322	0.128703	0.0270662	0.0349711
Sol 789	176	45.0315	1.63852	2.87429	1.27053	2.28813	0.401534	19.0966	0.679524	17.5935	0.804428	0.279259	0.159392	0.168933	0.127138	4.70344	0.255523	3.13334	0.400221	0.0759419	0.06683	0.292322	0.161257	0	0	0.0217772	0.0353134
Sol 789	177	44.6985	2.2844	0.539999	0.840841	2.72715	0.416719	20.0351	0.71093	16.4702	0.760192	0.296663	0.161652	0.227513	0.147366	4.31019	0.308164	3.38356	0.388534	0.0504551	0.0507721	0.416158	0.155728	0	0	0.035663	0.0455321
Sol 789	178	43.2672	1.56504	0.12087	0.845392	2.82444	0.424593	18.8657	0.670282	16.0809	0.742376	0.740616	0.181095	0.270178	0.126427	5.06364	0.201676	3.18114	0.39911	5.01457e-05	0.00937724	0.492574	0.132501	0	0	0.0374797	0.0461701
Sol 789	179	42.7496	1.54246	0	0	3.2106	0.417266	19.5153	0.693054	16.5376	0.758938	0.465494	0.142268	0.0923458	0.0847133	3.9534	0.349676	3.38672	0.389636	0	0	0.242441	0.149702	0	0	0.0573303	0.0529801
Sol 789	180	41.3094	1.49246	0.746774	0.862988	3.19088	0.425904	21.6629	0.769317	16.3013	0.756677	0.191706	0.133228	0.282305	0.162129	2.91479	0.404074	3.58162	0.378629	0	0	0.0815577	0.0697731	0	0	0.146266	0.111147
Sol 789	181	39.5052	1.42752	0.386004	0.839075	3.23684	0.423374	22.7979	0.808674	15.7068	0.735462	0.183325	0.129541	0.267039	0.149238	2.92369	0.402734	3.70972	0.368497	0	0	0.0713273	0.062104	0	0	0.114699	0.0926667
Sol 789	182	29.5255	1.6663	0.171099	0.84967	1.93233	0.530063	23.1914	0.824417	15.0244	0.723479	0.470885	0.158565	0.171315	0.12763	2.7769	0.576763	2.8069	0.572884	0	0	0.2163	0.142412	0	0	0.0182971	0.0326341
Sol 789	183	15.6215	0.58691	0	0	1.60158	0.348322	44.0863	2.26303	15.6014	0.778877	0.62259	0.156095	0.153265	0.118043	2.83145	0.577469	2.83228	0.565143	0	0	0.647439	0.160918	0	0	0	0
Sol 789	184	19.6772	0.729025	0.613298	1.06319	1.02667	0.371909	38.2249	1.35503	15.9966	0.780231	0.458225	0.143399	0.161618	0.120587	4.45923	0.28676	3.52725	0.381086	0	0	0.453695	0.144234	0	0	0	0
Sol 789	185	21.3183	0.787619	0.880949	1.01774	1.26031	0.302311	37.7471	1.34128	17.4614	0.83662	0.285276	0.159785	0.0428534	0.0556062	5.78368	0.228017	3.42264	0.388109	0	0	0.430243	0.230733	0	0	0	0
Sol 789	186	32.6659	1.19002	0.813511	1.30963	1.87859	0.380457	27.0078	0.961611	18.3079	0.845388	0.229172	0.146813	0.0373279	0.050926	5.17643	0.240752	3.35228	0.503633	0	0	0.732547	0.179378	0	0	0.0204394	0.0334465
Sol 789	187	30.812	1.13717	0.366546	0.947658	1.34338	0.316569	34.7004	1.24708	17.9887	0.89353	0.374885	0.153372	0.017861	0.0400214	6.56311	0.263472	2.75083	0.406968	0	0	0.459769	0.148388	0	0	0	0
Sol 789	188	35.7725	1.30517	0.900603	1.28666	1.00897	0.260967	33.8834	1.2034	16.9699	0.810004	0.373337	0.155282	0.0151111	0.0367978	6.49729	0.256329	2.3058	0.381058	0	0	0.449298	0.148874	0	0	0	0
Sol 789	189	51.0868	1.83768	0.918953	0.872787	0.68735	0.200721	24.7534	0.879971	13.5378	0.659433	0.542428	0.138275	0	0	4.57631	0.274999	1.9137	0.358673	0	0	0.418561	0.155582	0	0	0	0
Sol 789	190	39.8816	2.05257	0.744028	0.972089	0.892675	0.244857	33.2837	1.22943	16.1141	0.802181	0.509443	0.167256	0	0	5.11456	0.339028	2.26324	0.498781	0	0	0.576967	0.177957	0	0	0	0
Sol 789	191	18.89	0.752943	0.829338	1.01612	1.00112	0.26602	37.0911	1.88256	20.9305	0.981848	0.814995	0.273055	0	0	6.2648	0.322098	1.63506	0.33122	0	0	0.576839	0.203483	0	0	0	0
Sol 789	192	26.2137	1.00373	0.958338	0.975529	1.15176	0.286362	33.0873	1.67796	17.838	0.854551	0.540443	0.193028	0	0	6.38264	0.320443	2.58227	0.394916	0.151551	0.11449	0.401096	0.154276	0	0	0	0
Sol 789	193	34.1433	1.33337	0	0	1.01598	0.267269	31.3535	1.18335	16.4684	0.850461	0.260386	0.122257	0.0110477	0.0352005	5.92726	0.384131	3.12158	0.347896	0.238408	0.123078	0.357814	0.133833	0	0	0	0
Sol 789	194	38.492	1.9725	2.24737	1.59177	1.16831	0.383813	25.1219	1.19068	15.8894	1.38462	0.636024	0.209791	0.092578	0.105048	7.02625	0.565279	3.07035	0.454466	0.017053	0.0378834	0.285786	0.13632	0	0	0	0
Sol 789	195	22.7599	0.885401	1.30723	1.03318	1.07142	0.271163	30.7943	1.11072	14.1507	0.71322	0.449205	0.149256	0.0227107	0.0394934	5.00789	0.317987	3.48635	0.381139	0	0	0.316574	0.161966	0	0	0	0
Sol 789	196	36.1207	1.31082	0.460764	0.96181	1.05973	0.269686	35.4875	1.25797	15.4223	0.756598	0.582116	0.209842	0.047162	0.0606314	4.70826	0.249646	3.26545	0.517283	0	0	0.467456	0.14413	0	0	0	0
Sol 789	197	36.5572	1.32468	1.7615	1.40516	1.05812	0.267849	34.6112	1.22673	14.0902	0.701769	0.336138	0.157789	0	0	4.80191	0.32159	3.22257	0.556837	0	0	0.400604	0.158308	0	0	0	0
Sol 789	198	23.4027	1.217	0.62087	1.00887	1.02031	0.263005	34.7161	1.7403	13.5352	0.9776	0.2637	0.221	0	0	4.8473	0.22391	3.32287	0.392582	0	0	0.2907	0.2272	0	0	0	0
Sol 789	199	24.4121	0.950992	0.524211	0.867737	1.58806	0.344223	28.2612	1.01899	13.8625	0.700789	0.484788	0.159109	0	0	5.05981	0.281383	2.81832	0.396276	0	0	0.295075	0.15745	0.711816	0.24763	0	0
Sol 789	200	22.299	1.18206	0.77332	1.02521	0.6179	0.265538	36.6321	1.87041	15.5882	1.09311	0.424934	0.154289	0.03758	0.0509153	7.083	0.395573	2.7416	0.568329	0	0	0.507407	0.171044	0	0	0	0
Sol 789	201	33.58	1.75417	0	0	1.14532	0.290114	25.2335	1.28955	14.4001	1.00071	0.4981	0.183265	0.0617	0.0888021	6.6478	0.372644	3.132	0.565434	0.0385	0.0670011	0.317071	0.136591	0	0	0	0
Sol 789	202	44.3673	2.27301	0.257721	0.948194	1.61556	0.362651	17.6649	0.711028	14.4461	0.770025	0.5937	0.211821	0.0720374	0.0846887	7.2019	0.398087	3.5934	0.534112	0.0242	0.0559001	0.156944	0.126516	0	0	0.3149	0.231002
Sol 789	203	41.005	1.90045	0.310759	1.30679	1.96185	0.393344	17.9447	0.792177	16.4051	1.18543	0.426133	0.154674	0.0726915	0.0861314	5.07391	0.390057	3.44701	0.340166	0.0192879	0.0368481	0.0954868	0.0971906	0	0	0.593311	0.192403
Sol 789	204	43.9657	1.94641	1.24622	1.43351	2.1464	0.392103	19.9733	0.824382	16.9456	1.03607	0.640983	0.206387	0.0941176	0.101242	4.65287	0.265178	4.04961	0.33839	0.0243562	0.0388776	0.100026	0.101013	0	0	0.607078	0.197716
Sol 789	205	42.5286	1.83274	0.486628	1.21941	2.09539	0.359176	18.2445	0.715199	16.6266	0.915879	0.692483	0.209573	0.0268363	0.0420228	4.09202	0.358229	3.60886	0.328061	0.0246789	0.0360673	0.180492	0.128707	0	0	0.374528	0.12785
Sol 789	206	37.0858	1.81668	1.12412	1.16954	1.98133	0.420887	19.5647	1.02082	17.4378	1.25556	0.364345	0.13064	0	0	4.39039	0.350957	3.48925	0.314189	0.00456022	0.0178184	0.156386	0.15055	0	0	0.190632	0.139916
Sol 789	207	7.7055	0.444786	0.570038	1.13198	0.860231	0.262559	45.5708	2.29219	16.6419	0.895505	0.355975	0.132467	0.0483092	0.0623844	3.87385	0.319866	2.80825	0.386815	0	0	0.509162	0.16787	0	0	0	0
Sol 789	208	20.4198	0.829157	2.2595	1.57548	1.09653	0.28857	41.5268	2.08989	16.7278	0.871866	0.405103	0.150805	0	0	4.16646	0.346914	3.34925	0.439557	0	0	0.467566	0.166262	0	0	0	0
Sol 789	209	22.3673	0.865889	1.70261	1.13867	1.14514	0.288329	41.2225	1.51588	17.1601	0.9169	0.29456	0.143569	0	0	4.04646	0.33417	3.12717	0.428046	0	0	0.46583	0.161042	0	0	0	0
Sol 789	210	23.5014	0.885572	1.74215	1.44053	0.913125	0.243619	37.5573	1.33734	17.2858	0.844691	0.411962	0.148221	0	0	4.82133	0.299069	2.96056	0.397764	0	0	0.482491	0.155662	0	0	0	0
Sol 789	211	17.5885	0.932746	1.44565	1.36545	0.829322	0.227958	39.689	1.40899	22.1131	1.00263	0.389753	0.159505	0	0	2.81969	0.401762	1.9658	0.361782	0	0	0.600314	0.151183	0	0	0	0
Sol 789	212	22.0155	0.8186	0.628554	0.928103	0.753577	0.216663	40.66	1.4657	17.1381	0.828474	0.484057	0.16078	0.0325507	0.0458425	3.95992	0.338401	2.55321	0.388402	0	0	0.282739	0.240576	0	0	0	0
Sol 789	213	29.7243	1.09052	0.630702	1.17352	0.639982	0.191508	28.1712	1.00063	18.7597	1.24993	0.499077	0.133067	0.0334309	0.046855	4.97755	0.223078	1.43324	0.419066	0	0	0.300713	0.215791	0	0	0	0
Sol 789	214	34.4932	1.26001	0.695156	0.946067	0.772178	0.220416	28.211	1.42477	14.4169	1.01508	0.259042	0.227172	0	0	6.37417	0.250822	2.09093	0.360946	0	0	0.323884	0.163976	0	0	0	0
Sol 789	215	36.1951	1.32463	1.51985	1.37563	1.10988	0.278515	30.3041	1.08159	13.6428	0.681713	0.267473	0.211929	0.137251	0.111315	6.34239	0.352582	2.90667	0.529246	0	0	0.280276	0.156581	0.0632902	0.0667949	0	0
Sol 789	216	27.5946	1.42551	1.18803	0.986516	1.08456	0.272689	34.3714	1.22072	15.953	0.766922	0.334477	0.164038	0.0277041	0.0416062	5.58031	0.219985	3.2737	0.392654	0	0	0.306916	0.162425	0.184008	0.129368	0	0
Sol 789	217	51.9179	2.6368	0.0621754	0.762002	0.448422	0.184394	20.4185	1.0244	9.9588	0.7433	0.1889	0.1867	0	0	5.7693	0.227116	2.2037	0.5389	0	0	0.1887	0.186	0	0	0	0
Sol 789	218	75.5779	2.69961	0.323139	0.649974	0.264695	0.174312	6.56276	0.23437	5.68295	0.341897	0.06	0.0537391	0.0203769	0.038007	4.3035	0.308865	1.15429	0.368506	0.00649214	0.0183778	0.0673501	0.0587658	0	0	0.00339937	0.0111479
Sol 789	219	75.7352	2.71855	0.416306	0.702582	0.197392	0.156382	10.7487	0.382694	5.82817	0.355418	0.182689	0.178634	0	0	4.2697	0.370972	0.821387	0.199358	0	0	0.108086	0.088443	0	0	0	0
Sol 789	220	79.2953	2.84131	0.455275	0.599422	0.0914885	0.106954	2.33156	0.384362	3.74695	0.423576	0.0799626	0.0960871	0	0	4.47331	0.316357	0.495758	0.135609	0	0	0	0	0	0	0.0398197	0.0461489
Sol 789	221	74.4791	2.65939	0.0154605	0.555609	0.289528	0.170275	2.07076	0.36916	4.6107	0.359611	0.118375	0.0950105	0.058612	0.0658076	6.52632	0.255706	0.811669	0.197482	0.00294599	0.0111349	0	0	0	0	0.0373659	0.0453876
Sol 789	222	42.6094	1.53808	0	0	0.749819	0.209229	19.8222	0.703609	10.8627	0.560095	0.35332	0.163015	0.104628	0.101076	6.27773	0.245793	2.21299	0.381218	0	0	0.173249	0.173731	0	0	0	0
Sol 789	223	26.576	0.972499	0	0	0.927027	0.247575	34.7121	1.23047	16.622	0.794905	0.308864	0.162867	0	0	5.39357	0.212874	3.37647	0.391746	0	0	0.3622	0.231026	0	0	0	0
Sol 789	224	19.6529	0.732976	1.46278	1.21401	0.582427	0.210594	45.4713	2.29311	15.3241	0.778119	0.466301	0.144916	0.0362574	0.0552578	6.51575	0.259464	4.3023	0.313002	0	0	0.575122	0.145756	0	0	0	0
Sol 789	225	15.8599	0.599202	0.85557	1.14919	0.569596	0.194424	50.7052	1.79723	15.0001	0.771195	0.376692	0.161711	0.0566209	0.0679462	5.04808	0.253614	4.48709	0.277558	0	0	0.794916	0.191816	0	0	0	0
Sol 789	226	14.228	0.771445	1.13876	1.03101	0.927242	0.247775	37.4839	1.38174	16.4828	0.849837	0.313171	0.150108	0	0	4.33266	0.322467	3.09192	0.383557	0	0	0.550672	0.154899	0	0	0	0
Sol 789	227	20.2747	0.804005	0	0	0.739071	0.219389	38.0792	1.94625	16.6127	0.836407	0.434771	0.156421	0	0	4.51594	0.316819	3.47466	0.31602	0	0	0.581519	0.200516	0	0	0	0
Sol 789	228	10.8643	0.596605	1.79496	1.21747	0.619177	0.195336	56.4476	2.00314	14.862	0.768547	0.581329	0.147268	0	0	5.77288	0.228118	4.73407	0.239864	0	0	0.960761	0.224034	0	0	0	0
Sol 789	229	11.7649	0.45975	2.98587	1.78043	0.708557	0.213386	58.0472	2.9073	14.5928	0.768432	0.395292	0.162894	0	0	5.17811	0.280324	5.2966	0.2801	0	0	0.912917	0.216573	0	0	0	0
Sol 789	230	13.8079	0.522761	0.326867	1.14584	0.541524	0.208771	50.1907	1.77809	15.3258	0.774628	0.309967	0.163113	0	0	3.86875	0.356597	4.65912	0.249594	0	0	0.5779	0.146111	0.0540717	0.0691919	0	0
Sol 789	231	15.0394	0.566223	1.86262	1.5142	0.930112	0.247741	45.1896	1.60257	17.7223	0.851984	0.388248	0.149806	0	0	3.81132	0.362764	3.46672	0.385019	0	0	0.385171	0.158901	1.02837	0.236432	0.130079	0.103431
Sol 789	232	11.8272	0.6422	1.31125	1.26362	0.903935	0.249023	53.1851	2.6643	15.447	0.78977	0.372333	0.156028	0.00775728	0.0343544	3.5166	0.5442	4.7548	0.33	0	0	0.4654	0.2012	0.1808	0.1813	0	0
Sol 789	233	8.47369	0.335998	2.22961	1.82411	0.492854	0.197687	58.3145	2.06637	14.3114	0.75934	0.430341	0.153175	0	0	4.35979	0.301015	4.90643	0.211042	0	0	0.937149	0.219514	0	0	0	0
Sol 789	234	9.16653	0.360349	2.12485	1.20217	0.69772	0.207247	54.5915	1.9362	13.5778	0.724424	0.391739	0.160768	0	0	4.72698	0.263041	4.89815	0.231711	0	0	1.02634	0.235884	0	0	0	0
Sol 789	235	12.2953	0.48151	3.88499	1.78723	0.536971	0.188493	52.1103	1.8639	14.9595	0.772036	0.542303	0.153535	0.0460892	0.0591389	4.92539	0.278468	4.68053	0.260636	0	0	0.725131	0.178736	0	0	0.0761055	0.0699893
Sol 789	236	10.2908	0.403092	1.57021	1.30241	0.308447	0.189984	56.5473	2.0032	15.8353	0.804827	0.771177	0.187426	0	0	4.39042	0.296657	4.73605	0.237394	0	0	0.713391	0.175057	0	0	0	0
Sol 789	237	15.7838	0.618286	0	0	0.680935	0.210685	45.2194	2.32184	17.1043	0.857943	0.461699	0.155611	0	0	5.02736	0.298902	3.97532	0.338813	0	0	0.647983	0.223713	0	0	0	0
Sol 789	238	21.6172	0.799255	1.56429	1.57169	0.532478	0.249332	45.0133	1.59486	13.6089	0.996513	0.383721	0.159873	0.0285658	0.042208	5.31718	0.213423	4.19993	0.316593	0	0	0.571697	0.144401	0	0	0	0
Sol 789	239	20.7651	1.09121	1.9595	1.58325	0.440637	0.188844	45.2177	1.60876	13.3262	1.01714	0.304468	0.155778	0.022988	0.0399691	4.70949	0.48774	4.66022	0.262936	0	0	0.573842	0.145186	0.264842	0.223477	0	0
Sol 789	240	28.854	1.50755	0.598214	0.933301	1.12611	0.280165	33.1438	1.17995	16.577	0.793324	0.220596	0.143754	0	0	5.13429	0.256646	3.21074	0.641268	0	0	0.356267	0.161907	0.523494	0.189028	0	0
Sol 789	241	54.0399	1.98123	0	0	0.62856	0.215372	20.6507	1.10926	10.6822	0.56127	0.255613	0.155445	0.043356	0.0584049	7.3156	0.289829	2.4041	0.556417	0	0	0.2343	0.209448	0.00453855	0.0135641	0	0
Sol 789	242	82.5011	2.97042	0	0	0.0857388	0.114993	1.39323	0.429942	4.37305	0.386031	0.0870384	0.0738679	0.0317063	0.0448543	5.79253	0.229985	0.577213	0.14883	0	0	0	0	0.00235803	0.00782665	0.0244387	0.0360728
Sol 789	243	80.2317	2.86168	0	0	0.0778818	0.101756	1.22885	0.380323	3.08824	0.630174	0.0716912	0.0625875	0	0	4.59621	0.366094	0.385483	0.158571	0.00394851	0.0129951	0	0	0	0	0.0149967	0.0275223
Sol 789	244	72.6169	2.62769	0	0	0.109931	0.119399	4.66758	0.269239	5.61779	0.339631	0.170042	0.123589	0	0	8.15431	0.447345	0.664314	0.232905	0	0	0.0346743	0.0438472	0	0	0	0
Sol 789	245	65.781	2.38734	0	0	0.366088	0.166655	8.00956	0.292369	8.36408	0.447511	0.0895676	0.0777054	0	0	8.63354	0.338793	1.44145	0.302841	0.0209937	0.0353306	0.101006	0.0844029	0	0	0.00220023	0.00900097
Sol 789	246	59.468	2.13102	0	0	0.489864	0.161723	6.52202	0.233655	6.97591	0.394779	0.379624	0.162632	0.0764823	0.0740916	5.87229	0.231743	1.74676	0.342514	0	0	0.0828682	0.0716617	0	0	0.00642796	0.0175263
Sol 789	247	31.3367	1.62378	0.444274	1.03213	1.14231	0.284065	37.2729	1.88218	12.7443	0.661418	0.923601	0.218333	0.429604	0.161229	7.50452	0.296994	2.69757	0.407603	0	0	0.431904	0.152935	0	0	0	0
Sol 789	248	28.9445	1.05618	0	0	1.16468	0.284177	29.7856	1.05682	13.3705	0.66909	2.45577	0.392601	2.62465	0.402621	6.12607	0.240248	3.01963	0.398836	0	0	0.301318	0.161822	0.0270318	0.0384592	0	0
Sol 789	249	33.0978	1.20142	0.31165	0.8999	0.622495	0.189347	28.0713	1.42317	17.1809	0.798405	0.610659	0.153593	0.582607	0.152342	7.68982	0.298212	2.14093	0.376472	0	0	0.24278	0.212815	0	0	0	0
Sol 789	250	33.8214	1.2374	0	0	0.440602	0.184426	26.977	0.963836	26.9582	1.64791	0.277856	0.158627	0	0	4.10054	0.335991	0.599766	0.213955	0	0	0.308916	0.214117	0	0	0	0
Sol 789	251	28.3747	1.03563	0.723889	0.807055	0.609357	0.186742	26.3658	1.34179	21.6384	0.959813	0.419187	0.219614	0.0830123	0.0884275	3.5494	0.541151	1.2152	0.380772	0	0	0.288815	0.226391	0	0	0	0
Sol 789	252	32.6007	1.7003	0	0	0.860414	0.239534	39.1786	1.44575	17.6686	0.854244	0.444115	0.159112	0	0	4.69772	0.340902	2.7703	0.39787	0	0	0.462491	0.159131	0	0	0	0
Sol 789	253	25.9283	0.953217	0.949898	1.35343	0.969174	0.253937	39.5974	1.40355	18.9958	0.884848	0.427005	0.202541	0	0	4.41906	0.293027	2.52169	0.396519	0	0	0.481969	0.136839	0	0	0	0
Sol 789	254	28.5209	1.47835	0	0	0.891319	0.238333	38.889	1.3814	19.4429	0.901062	0.407642	0.156574	0	0	3.23852	0.390102	2.56959	0.393698	0	0	0.483659	0.137506	0	0	0	0
Sol 789	255	28.0267	1.03915	1.96677	1.43527	0.880306	0.241595	38.7532	1.38434	18.831	0.895746	0.417451	0.149078	0	0	3.11326	0.397818	2.92182	0.510225	0	0	0.419212	0.154423	0.805879	0.273471	0	0
Sol 789	256	18.0543	0.708487	1.33946	1.05039	0.780169	0.221505	41.8208	1.52293	20.1902	0.972814	0.575053	0.17309	0	0	3.09953	0.393899	2.48068	0.391296	0	0	0.556148	0.163073	0	0	0	0
Sol 789	257	32.173	1.26031	0	0	1.32454	0.317921	26.9029	1.36299	18.7956	0.929331	0.399392	0.145094	0	0	3.96152	0.343778	2.74983	0.44877	0	0	0.270049	0.203211	0	0	0.0586287	0.0677239
Sol 789	258	44.6726	1.72182	0.42763	0.807199	2.15609	0.404391	19.1126	0.702646	17.3857	0.833959	0.322185	0.119107	0	0	3.14243	0.43097	3.8167	0.361901	0.00229196	0.0125016	0.134361	0.105566	0	0	0.449017	0.154949
Sol 789	259	42.1885	1.68278	0	0	2.20849	0.361583	18.2553	0.691582	16.3006	0.837115	0.345218	0.129526	0	0	3.47871	0.374851	3.81113	0.315582	0	0	0.112566	0.0977852	0	0	0.346904	0.290383
Sol 789	260	39.6526	1.7313	1.33986	1.03368	2.60494	0.38687	19.2017	0.770881	15.9687	0.897588	1.92049	0.440779	0.0587612	0.0725236	7.82486	0.436759	3.77482	0.320407	0	0	0.0742567	0.0776662	0.00275731	0.0102725	0.683167	0.211738
Sol 789	261	36.8032	1.87507	1.07887	1.10275	2.34602	0.457061	17.4194	0.808787	14.0871	1.4541	1.0843	0.331438	0	0	6.88253	0.385991	3.29237	0.350042	0.00174778	0.0133802	0.0990294	0.102264	0	0	0.698682	0.222352
Sol 789	262	27.9727	1.0777	1.61499	0.830233	1.03391	0.26293	10.8285	0.392881	9.35948	0.523882	0.442736	0.155325	0	0	5.36317	0.337576	1.98513	0.353975	0.0544765	0.054614	0.106847	0.0909869	0.00531034	0.0149196	0.0678672	0.0836721
Sol 789	263	23.893	0.890245	0.818815	1.26101	0.823855	0.227405	24.8557	0.924464	13.1839	0.686487	0.24464	0.146463	0	0	5.33284	0.397229	2.47102	0.386506	0.0107116	0.0260145	0.229198	0.138867	0.392499	0.144388	0	0
Sol 789	264	30.1017	1.22261	0.972169	1.3454	1.05119	0.275301	25.7737	0.991791	13.8776	0.810354	0.442556	0.150621	0.024391	0.0432746	6.05391	0.39877	2.37077	0.446664	0.00196438	0.0129868	0.252957	0.148738	0.450709	0.155402	0	0
Sol 789	265	46.6143	1.97142	0.64838	0.781994	0.817565	0.243663	18.3193	0.87854	10.3752	0.64641	0.341401	0.119907	0.0270243	0.0436607	4.49878	0.359545	2.02147	0.36988	0	0	0.230239	0.132087	0.116697	0.105183	0	0
Sol 789	266	40.2094	2.05938	0.818394	0.837597	0.745535	0.210088	28.7337	1.01871	12.8422	0.926607	0.378647	0.16174	0	0	5.09044	0.309702	1.89762	0.35638	0	0	0.34661	0.155733	0	0	0	0
Sol 789	267	48.1972	1.7395	0.514116	0.897538	0.728673	0.210729	32.9567	1.16886	13.9299	0.692585	0.3831	0.229061	0.0120008	0.0345149	3.88383	0.355722	2.27184	0.541968	0	0	0.427456	0.151133	0	0	0	0
Sol 789	268	27.1821	1.0134	0	0	0.947525	0.251222	36.9633	1.32263	17.3409	0.847173	0.473549	0.149249	0	0	4.06625	0.340659	2.92548	0.399099	0	0	0.495207	0.152945	0	0	0	0
Sol 789	269	22.9853	0.846829	2.0193	1.38997	0.920548	0.247321	29.8051	1.07103	15.4872	0.755102	0.2785	0.140478	0	0	3.4382	0.553228	2.22164	0.375163	0	0	0.316569	0.157832	0	0	0	0
Sol 789	270	17.931	0.819895	1.39121	1.15409	0.618598	0.229263	24.4701	1.11458	12.6879	0.877723	0.276354	0.101587	0.0144233	0.038414	6.42742	0.430781	2.6585	0.324634	0	0	0.322239	0.110886	0	0	0	0
Sol 789	271	23.739	1.05654	1.44668	1.53177	0.620744	0.236743	33.5723	1.38477	15.8631	0.934456	0.377212	0.131933	0	0	6.38545	0.438861	2.95918	0.375522	0.0263688	0.0379154	0.389194	0.136214	0	0	0	0
Sol 789	272	19.8648	0.809619	0	0	0.949907	0.257995	34.9642	1.78586	17.4167	1.1434	0.704496	0.240375	0.0267237	0.0416244	5.70096	0.35635	1.97381	0.347523	0	0	0.40913	0.173967	0	0	0.0438668	0.047777
Sol 789	273	22.036	1.15286	0.394262	0.962331	1.02296	0.263555	34.6469	1.23175	15.9662	0.787311	0.463762	0.142187	0	0	5.97555	0.236873	2.59182	0.387579	0	0	0.416732	0.155644	0	0	0	0
Sol 789	274	29.7193	1.1268	1.63542	0.965132	1.05364	0.267085	26.8597	0.977021	14.0614	0.709355	0.83446	0.201343	0.102636	0.0928773	8.52874	0.338715	2.71991	0.399558	0.00898819	0.0234888	0.301165	0.153375	0	0	0	0
Sol 789	275	35.0484	1.81006	3.25163	1.41214	1.65084	0.354339	31.669	1.14107	15.968	0.772905	0.822484	0.199104	0.0599783	0.0718443	8.53737	0.336394	2.91966	0.521308	0.00305886	0.0131531	0.378955	0.153967	0	0	0	0
Sol 789	276	28.8794	1.05467	0.408867	0.972159	1.09947	0.276926	35.5934	1.26289	17.8134	0.834728	0.517821	0.132764	0	0	7.36702	0.28626	3.36915	0.541889	0	0	0.383581	0.233812	0	0	0	0
Sol 789	277	24.8491	0.919163	2.86785	1.576	1.53144	0.338478	42.1331	1.4978	17.1897	0.829686	0.353921	0.163572	0	0	5.40357	0.303689	4.0721	0.406827	0	0	0.465586	0.147605	0	0	0	0
Sol 789	278	24.2166	0.894378	0	0	1.1754	0.288041	39.8271	1.41259	17.5391	0.831262	0.297789	0.161893	0.0369066	0.049942	5.35773	0.301326	3.52266	0.451853	0	0	0.392924	0.159355	0	0	0	0
Sol 789	279	18.0645	0.967446	1.66746	1.60107	1.01318	0.263236	45.0107	1.59876	15.5576	0.78192	0.364	0.231427	0	0	4.27488	0.315339	3.58526	0.379342	0	0	0.601383	0.1517	0	0	0	0
Sol 789	280	15.6157	0.839733	0.947545	1.06701	1.12922	0.282086	42.8531	1.51989	17.1286	0.829848	0.42296	0.155092	0	0	3.29802	0.397256	3.13333	0.396015	0	0	0.672869	0.173335	0	0	0	0
Sol 789	281	23.78	0.882676	0.518029	0.889429	1.49851	0.334295	30.8926	1.0965	17.3617	0.818085	0.446137	0.146984	0.163152	0.123312	3.68024	0.50014	2.48753	0.394456	0	0	0.364457	0.158705	0	0	0	0
Sol 789	282	41.8953	1.51585	0	0	2.2513	0.40377	21.4335	0.762398	16.4172	0.757788	0.289062	0.160828	0.198507	0.130118	3.24996	0.398762	3.27994	0.395845	0	0	0.310326	0.161876	0	0	0	0
Sol 789	283	44.3853	2.2621	0	0	2.39749	0.413833	20.3094	1.019	17.3103	0.786609	0.2105	0.1988	0.149912	0.118128	3.0195	0.403877	3.1265	0.5646	0.0225182	0.0359929	0.2779	0.224	0	0	0	0
Sol 789	284	42.1742	1.52153	0.756728	0.833131	2.92493	0.42554	21.1788	0.751422	15.7195	0.731111	0.712045	0.175142	0.260337	0.155709	5.55207	0.218567	3.42989	0.387397	0	0	0.201416	0.136595	0	0	0	0
Sol 789	285	41.9853	1.51848	0.483303	0.887485	2.75165	0.427732	22.4988	0.79911	15.8371	0.749042	1.20793	0.267013	0.169172	0.128114	6.74657	0.263603	3.59309	0.377119	0	0	0.126977	0.0998682	0	0	0.0981198	0.0822612
Sol 789	286	45.549	1.6473	0.594363	0.82391	3.04406	0.421575	19.8823	0.707061	17.031	0.775051	0.199182	0.135943	0.169354	0.126752	3.42792	0.390081	3.31532	0.391837	0	0	0.192151	0.132847	0	0	0.0670262	0.0593716
Sol 789	287	45.1178	2.37407	0	0	2.37045	0.401357	18.3024	0.649916	15.2783	1.02221	0.147144	0.111665	0.148556	0.116673	3.89893	0.354714	2.91248	0.574534	0.0887937	0.0758483	0.236395	0.147709	0	0	0.0148986	0.0300962
Sol 789	288	46.5409	1.68705	0	0	2.42526	0.408603	19.4735	0.692726	18.1565	0.82162	0.166518	0.121521	0	0	3.5254	0.383212	3.21353	0.394701	0.0288887	0.0421293	0.181236	0.128264	0	0	0.0544869	0.0548176
Sol 789	289	45.3973	1.64311	0	0	2.14275	0.398318	19.003	0.67525	16.8411	0.778282	0.227621	0.144142	0.0803972	0.0849404	5.65386	0.222486	3.23265	0.395827	0.102164	0.0854141	0.169781	0.12287	0	0	0.107353	0.0891481
Sol 789	290	47.3192	1.70435	0.0730957	1.50049	2.2172	0.403751	18.744	0.665314	17.2438	0.779785	0.134126	0.104503	0.109246	0.0943908	5.06186	0.200304	3.0005	0.572143	0.0815	0.100016	0.272941	0.1576	0	0	0.0960702	0.0828828
Sol 789	291	46.0057	1.65856	0	0	2.85269	0.426313	19.5495	0.693775	17.5299	0.794804	0.213095	0.141192	0.0736358	0.0819184	3.70272	0.371872	3.27418	0.394057	0	0	0.262643	0.155354	0	0	0.0632532	0.0584174
Sol 789	292	42.9026	1.54693	0	0	2.46085	0.415685	20.193	0.716708	16.8416	0.768293	0.488382	0.133652	0.143867	0.114612	5.1449	0.203303	3.07168	0.400623	0	0	0.167701	0.12195	0	0	0.122818	0.0976326
Sol 789	293	41.7942	1.50997	0.913569	0.891154	2.92996	0.425962	20.83	0.740374	15.9299	0.742155	0.40798	0.15858	0.199195	0.139578	5.1046	0.308998	3.5149	0.546914	0	0	0.092763	0.0781721	0.716302	0.175535	0.0717567	0.0630365
Sol 789	294	44.6224	1.60872	1.12303	1.188	2.29389	0.400777	18.0813	0.641893	16.5989	0.757418	0.123991	0.098384	0.152602	0.11866	3.49153	0.385599	3.3198	0.393146	0.017198	0.0323524	0.198517	0.135518	0	0	0	0
Sol 789	295	48.3395	1.77081	0.529019	0.795646	2.3051	0.400548	18.0059	0.64849	18.5742	0.844188	0.150715	0.113774	0.147341	0.116212	3.23877	0.393319	3.14785	0.389281	0.060415	0.0550064	0.208288	0.137665	0	0	0	0
Sol 789	296	36.2493	1.40635	0.742526	1.20703	1.78479	0.366416	21.4565	0.793661	17.3419	0.819306	0.330175	0.166159	0.0794617	0.0874527	5.35238	0.299667	2.73636	0.401544	0.0487635	0.0531656	0.304246	0.158518	0	0	0	0
Sol 789	297	19.8452	0.764865	0	0	1.20618	0.29631	36.0097	1.85694	17.161	1.13572	0.426099	0.163138	0	0	5.27251	0.298794	2.76552	0.489721	0	0	0.458849	0.165409	0	0	0	0
Sol 789	298	22.2811	0.855985	0.926375	1.02641	0.987008	0.260524	42.133	1.52798	17.9475	0.870557	0.436142	0.152677	0.0210549	0.041551	4.75197	0.297785	3.59758	0.381295	0	0	0.555702	0.174549	0	0	0	0
Sol 789	299	29.2262	1.09875	1.53841	1.50244	1.24708	0.30319	37.6647	1.36623	17.4994	0.854381	0.696334	0.24021	0.0243891	0.0411794	5.36092	0.300446	3.57168	0.387476	0	0	0.409491	0.156935	0	0	0	0
Sol 789	300	30.7951	1.13507	0.622472	1.41652	1.06651	0.274135	36.5527	1.29911	16.5982	0.794794	0.739158	0.181083	0.0109268	0.0338883	6.74988	0.374289	3.84859	0.358192	0	0	0.380436	0.160218	0	0	0	0
Sol 789	301	18.9542	1.00922	0.948226	1.47777	1.07554	0.272317	40.0133	1.41895	18.6371	0.875262	0.428989	0.153091	0	0	5.56401	0.21881	3.25842	0.394414	0	0	0.362903	0.230416	0	0	0	0
Sol 789	302	15.217	0.572886	2.64216	1.68843	0.811531	0.228714	49.8931	1.76738	16.882	0.829467	0.605065	0.152306	0.00800256	0.0288789	6.5105	0.25397	4.1099	0.328451	0	0	0.616153	0.154221	0	0	0	0
Sol 789	303	25.9829	1.3437	1.66991	1.41982	1.2421	0.298391	29.1694	1.03636	15.7029	1.0693	0.720354	0.177097	0.0894264	0.0819598	11.4944	0.6227	3.1963	0.5622	0	0	0.373945	0.16292	0	0	0	0
Sol 789	304	30.0592	1.11351	0	0	0.69113	0.223028	26.8522	1.35429	14.5585	0.710738	0.516813	0.1406	0.0198384	0.0394776	10.7372	0.415542	2.75379	0.535281	0	0	0.31535	0.163766	0	0	0	0
Sol 789	305	22.8472	1.19627	0	0	0.9843	0.25848	35.6678	1.80045	16.0967	0.784053	0.3888	0.227812	0	0	8.25704	0.321557	2.61149	0.540704	0	0	0.422707	0.151345	0	0	0	0
Sol 789	306	22.9425	0.870513	0.498746	1.03427	0.904565	0.243776	38.8825	1.40241	17.8135	0.863303	0.275742	0.153779	0	0	4.54539	0.309582	2.75065	0.403627	0	0	0.421071	0.18764	0	0	0	0
Sol 789	307	27.729	1.4407	1.91089	1.42773	0.636053	0.218366	35.9733	1.8135	18.4845	1.22298	0.212651	0.138757	0	0	7.03592	0.287872	2.81405	0.507294	0	0	0.40355	0.149845	0	0	0	0
Sol 789	308	29.5328	1.54229	0	0	0.671966	0.201512	30.8325	1.09366	16.787	0.792875	0.310873	0.160978	0	0	5.52227	0.217937	2.50759	0.395974	0.0153505	0.031049	0.468664	0.140472	0	0	0	0
Sol 789	309	28.8161	1.08654	0.10941	0.95135	0.733834	0.213021	37.8222	1.36432	20.4725	0.960656	0.438093	0.1549	0.0234524	0.0404162	3.80346	0.371678	1.99866	0.368077	0	0	0.721754	0.179049	0	0	0	0
Sol 789	310	43.5279	1.5723	1.13651	1.2615	0.842435	0.229445	32.219	1.14877	15.9347	0.769579	0.439891	0.150331	0	0	4.91825	0.232805	1.87811	0.353815	0	0	0.504781	0.140386	0	0	0	0
Sol 789	311	51.0018	2.59779	0.337042	0.783935	0.737153	0.209353	22.7125	0.806157	13.917	0.669322	0.421625	0.232197	0	0	6.52197	0.254979	1.07271	0.246112	0	0	0.305372	0.23614	0	0	0	0
Sol 789	312	44.1742	1.60309	1.77851	1.13271	0.903113	0.237692	14.7278	0.532212	13.3824	0.654903	0.332769	0.164621	0	0	6.59886	0.260925	1.72157	0.33909	0	0	0.192017	0.132201	0	0	0	0
Sol 789	313	49.4192	1.84018	0	0	1.20325	0.292701	19.5176	0.70395	14.9178	0.717702	0.280641	0.140152	0.0293966	0.0434848	4.00027	0.361854	2.69859	0.509521	0	0	0.355383	0.159126	0	0	0	0
Sol 789	314	46.5487	1.70377	0.362553	0.872887	1.11527	0.277267	26.6899	0.95837	16.8539	0.788034	0.371394	0.149495	0.0705639	0.0794137	3.25046	0.393349	2.6804	0.399185	0	0	0.528046	0.134825	0.0751423	0.0663179	0.166467	0.121579
Sol 789	315	42.2351	1.54322	0	0	1.47909	0.333562	29.5556	1.05974	17.4765	0.825874	0.5046	0.151552	0	0	4.18315	0.31661	2.97437	0.402051	0	0	0.39778	0.158503	0.121531	0.0967466	0.443957	0.18802
Sol 789	316	44.7408	1.67477	0	0	1.2188	0.296044	22.3149	0.812815	15.0823	0.738583	0.774653	0.191135	0.212012	0.144318	6.09637	0.327733	2.19186	0.467544	0.0201868	0.0348731	0.315757	0.161459	0	0	0.00103584	0.00916722
Sol 789	317	37.4723	1.38625	0.632979	1.1776	2.43963	0.415858	18.711	0.669367	14.5711	0.707694	1.3256	0.286214	0.371897	0.157527	7.40676	0.297222	3.30842	0.392475	0	0	0.0776873	0.0703697	0	0	0.529116	0.141502
Sol 789	318	40.4406	1.46107	0.921706	0.84783	2.86825	0.419707	19.9861	0.710775	15.5338	0.727124	0.341994	0.164329	0	0	4.57987	0.268629	3.6454	0.371157	0	0	0.102713	0.0845085	0	0	0.697793	0.171923
Sol 789	319	42.6682	2.19462	0.0159069	0.813846	1.43937	0.325503	15.2381	0.564194	14.8352	0.705556	0.449386	0.156745	0.00324701	0.0240482	7.83592	0.312499	2.93558	0.398049	0.0138085	0.0300032	0.156082	0.116157	0	0	0.210297	0.139391
Sol 789	320	37.4443	1.35435	1.14151	1.17473	1.26061	0.299391	18.7582	0.666848	14.466	0.689757	0.544961	0.138751	0.0088922	0.0308301	9.55836	0.368245	2.30369	0.386512	0.0371829	0.0431343	0.142134	0.108508	0	0	0.0254218	0.0375226
Sol 789	321	37.7953	1.39362	1.58499	1.21253	0.59864	0.203349	27.7538	1.00084	16.1136	0.782582	1.5176	0.44243	0	0	6.1034	0.355409	1.1088	0.357249	0	0	0.6412	0.22579	0	0	0	0
Sol 789	322	34.5691	1.25685	0	0	0.777494	0.217304	31.9051	1.13095	18.0095	0.83309	1.4118	0.415295	0	0	3.75123	0.565779	1.41577	0.298879	0	0	0.732114	0.17875	0	0	0	0
Sol 789	323	46.5267	2.37155	0.28195	0.8113	0.449475	0.175303	21.6381	0.767589	14.1758	0.681004	0.410717	0.225756	0	0	4.10727	0.482022	1.63721	0.327684	0	0	0.459524	0.14369	0	0	0	0
Sol 789	324	47.5065	2.73	0	0	0.527817	0.169372	30.7746	1.10021	15.9194	0.769537	0.6601	0.233131	0.00907827	0.0317489	3.95046	0.317893	1.3417	0.41054	0	0	0.671297	0.166109	0	0	0	0
Sol 789	325	32.9303	1.23854	0.104047	0.957909	0.552254	0.186	31.7522	1.14545	14.9479	0.73991	0.742572	0.185704	0.0223723	0.0401813	4.41146	0.310107	2.4526	0.390416	0	0	0.562825	0.167249	0	0	0	0
Sol 789	326	27.7974	1.48605	0	0	0.395367	0.18032	23.9774	1.24813	20.6966	1.32798	0.328981	0.153318	0.0597043	0.0708399	3.62721	0.341498	1.40537	0.296128	0	0	0.324546	0.159491	0	0	0	0
Sol 789	327	30.032	1.09824	1.11283	1.09492	0.299738	0.179038	23.5702	1.19736	28.1454	1.18281	0.272309	0.144908	0.061025	0.0714391	3.51181	0.374616	0.454974	0.235286	0	0	0.188206	0.190463	0	0	0	0
Sol 789	328	31.6829	1.6707	0	0	0.3511	0.270618	22.8447	0.827575	19.0254	0.864336	0.4074	0.223352	0	0	6.2705	0.354336	1.5242	0.444865	0	0	0.369767	0.159844	0	0	0	0
Sol 789	329	36.0711	1.31119	0.172046	1.60785	1.28138	0.302434	24.0094	0.855833	13.1661	0.651761	1.01207	0.234115	1.22676	0.274728	5.01399	0.247805	2.94866	0.401825	0	0	0.319653	0.161841	0	0	0	0
Sol 789	330	32.0339	1.18235	1.03167	0.98327	1.15421	0.283449	26.8962	1.35663	12.3474	0.634807	0.842675	0.282481	0.883106	0.215026	6.76548	0.269187	2.96135	0.40994	0	0	0.329053	0.15975	0	0	0	0
Sol 789	331	36.3325	1.3208	0.86254	0.864453	1.05664	0.26429	30.1089	1.06746	11.3081	0.601325	0.290024	0.157991	0.089437	0.0819363	5.78288	0.226827	2.09053	0.542173	0	0	0.335593	0.241885	0	0	0	0
Sol 789	332	60.5205	2.26757	0.0325476	0.686211	0.435078	0.17809	12.049	0.444069	10.3274	0.539594	0.17344	0.122903	0.0408779	0.0556107	6.35925	0.365924	1.54547	0.322954	0	0	0.167065	0.16402	0	0	0	0
Sol 789	333	73.2628	2.66633	0	0	0.177492	0.149895	3.37225	0.314502	5.98732	0.349777	0.0971476	0.0862178	0.0148018	0.0370553	8.56698	0.346875	0.562681	0.176188	0	0	0.0198651	0.032654	0	0	0.0209848	0.0336313
Sol 789	334	80.1905	4.07438	0.149293	0.693501	0.115416	0.126643	3.17755	0.372139	7.11193	0.396468	0.06003	0.0590814	0.00205859	0.0215901	8.13584	0.448324	0.293265	0.15543	0	0	0.00919094	0.0183401	0	0	0.00404975	0.0167777
Sol 789	335	81.2969	4.23086	0.671596	0.668321	0.0765459	0.0995671	11.0672	0.573669	8.03439	0.434713	0.0801	0.0974053	0	0	7.0623	0.399238	0.48807	0.157561	0	0	0.12168	0.0972627	0	0	0	0
Sol 789	336	72.5277	2.62009	0	0	0.187527	0.15095	1.98351	0.359363	6.1204	0.358363	0.0886748	0.104596	0	0	7.92187	0.312957	0.666224	0.169089	0.00497989	0.015037	0.00634883	0.016647	0.0183931	0.0310933	0.0100675	0.0236738
Sol 789	337	46.7468	2.38949	0	0	0.586725	0.19872	12.0818	0.436786	8.84738	0.716183	0.104885	0.126556	0.0366844	0.0502544	8.18712	0.326505	1.71042	0.332626	0	0	0.104465	0.08643	0.162917	0.118596	0	0
Sol 789	338	44.2148	1.60369	0	0	0.690208	0.20914	24.9417	0.893471	11.5356	0.59831	0.211761	0.133734	0.00784093	0.0309145	6.9586	0.274776	2.95369	0.396641	0	0	0.326483	0.164784	0.0813376	0.0719171	0	0
Sol 789	339	45.6246	1.64343	0.170156	0.856217	0.633388	0.18956	26.091	0.925391	11.1197	0.57645	0.222818	0.143626	0.040751	0.0768873	5.76292	0.22704	2.93157	0.558545	0	0	0.331152	0.163729	0	0	0	0
Sol 789	340	31.775	1.16617	1.25519	1.35277	0.608174	0.197117	30.0232	1.06682	12.0578	0.628833	0.422844	0.155023	0.0724575	0.0713991	6.49782	0.254401	3.44011	0.387333	0	0	0.480018	0.141718	0	0	0	0
Sol 789	341	14.8203	0.796787	0.554891	1.16253	0.680254	0.206281	50.6538	1.797	16.619	0.819022	0.956553	0.223616	0	0	6.27448	0.245678	4.1505	0.325747	0	0	0.758272	0.184384	0	0	0	0
Sol 789	342	17.2947	0.655618	0.735972	1.21983	2.00417	0.390545	49.5784	1.78781	15.0941	0.779685	0.751819	0.186509	0.0245031	0.0408899	5.57653	0.232367	4.12594	0.338792	0.0852705	0.0740906	0.641232	0.168992	0	0	0.00752434	0.0208839
Sol 789	343	11.0859	0.431147	1.95413	1.71989	1.08548	0.278578	55.311	1.9661	15.1767	0.779004	0.486357	0.147662	0.0071844	0.027984	4.2117	0.322837	4.7264	0.261848	0	0	1.0035	0.2321	0	0	0	0
Sol 789	344	8.16303	0.324747	0	0	0.67708	0.20892	59.8239	2.11929	13.9808	0.746709	0.544093	0.138842	0	0	4.60826	0.266901	4.71919	0.296021	0	0	1.09251	0.247459	0	0	0	0
Sol 789	345	7.65705	0.449336	4.95468	1.85698	0.667353	0.204971	56.1119	1.98801	15.0882	0.781429	0.486254	0.135128	0.0150656	0.0368883	3.82844	0.359282	5.04063	0.198893	0	0	0.870008	0.206626	0	0	0	0
Sol 789	346	8.85629	0.348663	0.76104	1.22612	0.556644	0.185144	57.9866	2.05463	14.4943	0.759959	0.528351	0.135261	0	0	4.29833	0.309909	4.69023	0.323665	0	0	0.952839	0.222354	0	0	0	0
Sol 789	347	12.7344	0.685716	2.31086	1.25289	0.96481	0.258476	52.245	1.85057	16.1081	0.805984	0.606898	0.152666	0	0	5.00592	0.206491	4.61308	0.257561	0	0	0.930095	0.218079	0	0	0	0
Sol 789	348	19.3095	1.0124	0	0	2.00578	0.391002	46.4547	2.3274	14.982	1.0595	0.826304	0.198714	0	0	6.2232	0.3439	4.14253	0.329138	0.0451064	0.0500346	0.697684	0.171923	0	0	0	0
Sol 789	349	29.2396	1.07779	3.43613	1.43409	4.5697	0.356792	29.2469	1.06109	14.5398	0.717407	0.428743	0.150262	0.0392694	0.0528825	5.63956	0.222312	3.35523	0.391671	0.633913	0.164887	0.352238	0.162013	0	0	0	0
Sol 789	350	23.992	0.880598	0.91843	0.971859	3.0911	0.426783	29.9549	1.06202	14.8259	0.722859	0.899817	0.213027	0	0	8.05748	0.311661	3.51921	0.382488	0.304621	0.230428	0.374583	0.162128	0	0	0	0
Sol 789	351	26.1383	1.43829	0	0	0.866378	0.241486	43.66	2.33413	16.3243	0.804454	0.4849	0.191314	0.0195251	0.0409979	8.10365	0.317388	4.4595	0.406798	0	0	0.6093	0.216199	0	0	0	0
Sol 789	352	37.0441	1.34363	0.914808	1.37843	1.16311	0.289485	37.7961	1.3431	14.4727	0.719006	0.141424	0.108978	0.0466692	0.0591155	4.22086	0.3094	4.0164	0.332921	0	0	0.426143	0.153558	1.31119	0.282678	0	0
Sol 789	353	26.6163	0.983086	0	0	0.644992	0.202366	45.4848	1.6166	15.067	0.763034	0.240984	0.147323	0.0255747	0.0397215	5.81765	0.23007	4.10086	0.331808	0	0	0.574144	0.145387	1.30361	0.281967	0	0
Sol 789	354	46.0301	1.77856	0.787282	1.18865	0.71992	0.213683	20.0246	1.01269	14.6328	0.734197	0.220531	0.191923	0	0	6.95607	0.325367	2.23803	0.481144	0	0	0.195126	0.180512	0.223434	0.202481	0	0
Sol 789	355	77.126	3.95237	0.481423	0.847503	0.412878	0.208187	5.8047	0.297441	9.60542	0.558236	0.2521	0.216711	0.0629044	0.0772389	7.6799	0.426987	0.7374	0.25828	0	0	0.057035	0.0619583	0	0	0	0
Sol 789	356	65.1916	2.36493	0	0	0.169406	0.14486	9.22594	0.330303	8.07343	0.438364	0.194187	0.184106	0	0	5.62072	0.222537	0.598294	0.153156	0	0	0.109198	0.0902432	0	0	0	0
Sol 789	357	60.3541	2.17327	0.463847	0.954301	0.170153	0.148945	10.2041	0.515757	10.6653	0.529425	0.356915	0.164075	0	0	7.31294	0.284559	0.543713	0.14088	0	0	0.126045	0.0992987	0	0	0	0
Sol 789	358	60.7715	2.19041	0.110024	0.683207	0.277417	0.175437	9.79484	0.35431	8.98355	0.474658	0.267766	0.157297	0.0182923	0.0429292	8.4734	0.474819	0.717201	0.178559	0	0	0.107875	0.087886	0	0	0	0
Sol 789	359	59.1046	2.12933	0	0	0.34224	0.16582	8.85695	0.321462	9.40641	0.485855	0.182257	0.121893	0.0390285	0.0520887	8.38859	0.328608	1.51358	0.31219	0.0126312	0.0261846	0.0930686	0.0791139	0	0	0.0117027	0.0326699
Sol 789	360	66.9063	3.3825	0	0	0.331025	0.171505	9.6947	0.4878	5.5103	0.345493	0.195706	0.132645	0	0	4.7108	0.351	1.25279	0.277516	0	0	0.132	0.1452	0	0	0.016	0.041
Sol 789	361	71.1195	3.64589	0	0	0.15414	0.144931	13.063	0.469196	5.60167	0.353448	0.192714	0.134149	0.0638324	0.0646969	4.1102	0.339835	1.50008	0.431142	0	0	0.170908	0.123917	0	0	0	0
Sol 789	362	48.5001	1.74727	0.603129	0.886048	1.16318	0.284131	28.5324	1.01251	11.8005	0.601329	0.273407	0.219589	0.0239071	0.0455865	3.49769	0.385975	2.89678	0.402271	0	0	0.405079	0.157719	0	0	0	0
Sol 789	363	32.7375	1.22884	1.39388	1.70497	1.23013	0.300187	30.6581	1.12985	15.5871	0.764863	0.443358	0.157289	0.0491367	0.0594559	5.10835	0.321331	2.97768	0.397775	0	0	0.564826	0.174332	0	0	0	0
Sol 789	364	26.8171	0.97973	1.67067	1.16974	0.491269	0.184707	22.5911	0.80151	19.5654	0.8765	0.364082	0.16151	0.0208551	0.0385173	4.35708	0.457572	1.35643	0.290249	0	0	0.354109	0.1635	0	0	0	0
Sol 789	365	30.4678	1.11954	0.430462	1.0713	0.386902	0.179297	21.7837	1.10159	20.1774	1.24895	0.254736	0.143118	0	0	3.20715	0.383571	0.918391	0.217617	0	0	0.278157	0.153172	0	0	0	0
Sol 789	366	40.5298	1.62605	0	0	0.500865	0.19389	24.3197	1.24309	13.7526	0.691968	0.573481	0.185495	0	0	4.67056	0.339216	2.25128	0.478971	0	0	0.369897	0.143932	0	0	0	0
Sol 789	367	31.0064	1.15095	0	0	0.638267	0.189735	30.7853	1.10733	18.2958	0.860802	0.460508	0.247675	0.0344137	0.0479937	9.13563	0.358632	1.34711	0.39121	0	0	0.464922	0.154631	0	0	0	0
Sol 789	368	35.9314	1.84396	1.24753	0.936763	0.795534	0.240798	16.4252	0.63076	14.7039	0.732245	0.425273	0.156247	0.0570966	0.0705531	14.4278	0.621653	1.54242	0.42051	0	0	0.222152	0.142398	0	0	0	0
Sol 789	369	43.2481	2.20596	0	0	1.24	0.419205	20.1632	1.01258	19.9096	1.24028	0.8	0.273206	0.0740135	0.090247	18.6476	0.956425	1.86469	0.461373	0.000189424	0.0125651	0.3237	0.231301	0	0	0	0
Sol 789	370	42.9398	2.1958	0.637794	1.2658	0.895214	0.28047	22.4945	1.13161	16.2905	0.848599	0.8781	0.29492	0.0557913	0.0710757	15.084	0.728134	1.36692	0.304585	0	0	0.4857	0.189609	0	0	0	0
Sol 789	371	54.0121	1.95732	0	0	0.628508	0.216117	13.9955	0.713845	10.2945	0.536418	0.3398	0.232319	0.00916705	0.0318855	10.2691	0.395207	1.58913	0.322469	0.0242378	0.0366162	0.0977	0.114403	0	0	0.00573988	0.0165209
Sol 789	372	45.4754	1.63643	0	0	0.889679	0.235274	10.5912	0.539165	12.4509	0.600684	0.307908	0.162125	0.0640077	0.0644563	9.11815	0.352987	2.13707	0.376967	0.070553	0.0625183	0.122039	0.0966487	0	0	0	0
Sol 789	373	46.8805	1.706	0.692897	1.11819	1.3047	0.306454	15.7397	0.581656	13.3342	0.647544	0.275505	0.157898	0	0	6.34146	0.35193	2.51135	0.396262	0.0276295	0.0353992	0.222569	0.144514	0	0	0.00983591	0.023808
Sol 789	374	48.4851	2.48762	0.70198	1.28024	1.52605	0.348671	17.8201	0.732031	13.7102	0.721216	0.439706	0.161454	0.0405867	0.0566811	7.02221	0.386774	2.94819	0.5132	0	0	0.185354	0.133085	0	0	0.0563872	0.0714135
Sol 789	375	54.9437	1.99555	0.577365	0.819118	0.737904	0.20888	21.9936	0.781632	11.9428	0.614272	0.574939	0.147239	0.0662086	0.0728145	6.62144	0.267057	2.05723	0.369987	0	0	0.346074	0.164157	0	0	0	0
Sol 789	376	45.5941	1.64983	0.129942	0.835909	1.92881	0.382364	24.5929	0.879735	18.283	0.832528	0.72424	0.179157	0	0	4.22596	0.367174	3.24672	0.398575	0	0	0.663942	0.165013	0	0	0.222648	0.144913
Sol 789	377	40.6706	2.10483	1.21224	1.26104	1.70917	0.359519	26.4868	0.940273	18.6319	0.847931	0.795484	0.192374	0	0	3.88747	0.355895	2.83241	0.402652	0	0	0.789792	0.190836	0	0	0.523052	0.13618
Sol 789	378	40.6933	1.48813	0.430077	0.862562	1.32553	0.309244	27.6761	0.982608	17.2013	0.807996	0.76197	0.18602	0.084426	0.0895278	5.19462	0.205327	2.70423	0.40147	0	0	0.497227	0.145864	0	0	0	0
Sol 789	379	33.3939	1.76557	0.0999556	0.762411	1.31651	0.305753	12.6917	0.451545	15.2168	0.705451	0.82483	0.198663	0.0760115	0.0736945	9.09379	0.350891	2.3311	0.551537	0.0259058	0.0340576	0.278355	0.158544	0	0	0.0218735	0.0359271
Sol 789	380	54.0237	2.07958	0.154158	0.824061	1.05514	0.272492	12.0788	0.463298	14.1073	0.689382	0.363518	0.159259	0.0279784	0.0428291	5.9195	0.330383	2.11484	0.473704	0.0432779	0.0531264	0.377835	0.151004	0	0	0.0207702	0.035299
Sol 789	381	68.0025	2.479	0.204102	0.774016	0.415741	0.175672	14.8691	0.752957	12.0778	0.596627	0.28	0.157243	0	0	4.08779	0.355029	1.38472	0.403954	0	0	0.210567	0.18864	0	0	0	0
Sol 789	382	44.1158	1.59687	0	0	0.442894	0.179483	35.0946	1.25569	17.8537	0.865405	0.632464	0.1585	0	0	3.76701	0.370174	1.09622	0.358564	0	0	0.648136	0.168752	0	0	0	0
Sol 789	383	43.7197	1.61653	0	0	0.687568	0.20377	28.1498	1.03098	19.318	0.892403	0.4153	0.221321	0	0	4.02609	0.354416	2.4388	0.39163	0.0399169	0.0461937	0.489135	0.162678	0	0	0	0
Sol 789	384	38.5975	1.40668	1.24413	1.28783	1.13993	0.281008	28.9316	1.02923	17.7962	0.821712	0.331037	0.164256	0	0	5.22013	0.206177	2.86683	0.401765	0.0221073	0.0339881	0.341983	0.215214	0	0	0	0
Sol 789	385	26.4183	1.01091	0.496047	0.992782	1.01706	0.264369	34.8835	1.2683	17.7573	0.849264	0.428326	0.153086	0.0293263	0.0422347	4.45332	0.315359	2.70785	0.399428	0	0	0.420344	0.150447	0	0	0	0
Sol 789	386	23.7023	0.871881	1.03056	1.01305	1.14229	0.283453	40.1281	1.42242	18.149	0.856147	0.359599	0.162996	0	0	4.18652	0.489009	2.57137	0.398019	0.141443	0.153035	0.356599	0.238247	0	0	0	0
Sol 789	387	36.7433	1.40587	3.04703	1.35167	0.759192	0.242357	21.2315	1.09477	14.6541	0.735752	0.636843	0.187446	0.0711264	0.0827931	9.57653	0.390136	3.2409	0.561531	0	0	0.207557	0.141019	0	0	0	0
Sol 789	388	32.4872	1.19018	0.33035	0.878559	1.26548	0.299621	20.4062	0.725355	13.482	0.660718	1.10011	0.249789	0.0289032	0.0486646	10.9606	0.426971	3.30755	0.396267	0.0676824	0.0691224	0.242581	0.20793	0	0	0	0
Sol 789	389	33.7976	1.23222	0.451945	1.43963	0.965907	0.257759	38.2229	1.35657	17.1001	0.813222	0.346147	0.220647	0	0	6.82802	0.379272	3.7573	0.469296	0.00326279	0.0165571	0.39613	0.16035	0	0	0	0
Sol 789	390	29.6327	1.08046	1.44134	1.07051	1.03642	0.267629	41.0493	1.45449	16.9285	0.809074	0.591792	0.149574	0	0	7.22913	0.281035	3.78136	0.517103	0	0	0.436779	0.149757	0	0	0	0
Sol 789	391	37.8912	1.38009	0	0	1.13747	0.279469	24.5371	0.871436	15.8986	0.747079	0.978919	0.227595	0	0	6.39157	0.249761	3.56304	0.379467	0	0	0.274658	0.157127	0	0	0	0
Sol 789	392	40.8557	1.49581	0.144581	0.949597	1.16148	0.288847	28.8614	1.03284	18.4541	0.857413	0.658185	0.230046	0.0149396	0.0356257	5.9266	0.331212	3.44077	0.388657	0.0141663	0.0301412	0.289216	0.15803	0	0	0	0
Sol 789	393	21.9624	0.81975	1.71566	1.5018	1.02992	0.265497	41.5036	1.47864	16.9061	0.818013	0.421589	0.20029	0	0	4.84845	0.240032	4.15096	0.328614	0	0	0.428141	0.150525	0	0	0	0
Sol 789	394	23.1279	0.850703	0	0	1.14011	0.282785	38.7112	1.37214	16.0391	0.77912	0.436655	0.151326	0	0	7.1012	0.276519	3.94517	0.346949	0	0	0.506592	0.129638	0	0	0	0
Sol 789	395	35.1259	1.34112	0	0	1.52723	0.339331	19.0329	0.699386	14.9179	0.717525	0.348073	0.195883	0.136969	0.116423	6.594	0.367111	2.96949	0.478133	0.122189	0.0999827	0.206418	0.138818	0	0	0	0
Sol 789	396	42.428	1.67686	0.647381	0.86198	2.13603	0.377703	18.7154	0.704028	17.7519	0.848018	0.210606	0.140298	0.19729	0.135872	5.31684	0.328805	3.03031	0.391003	0.0764739	0.0727075	0.25431	0.154072	0	0	0	0
Sol 789	397	41.1268	1.49585	0.156319	1.12662	2.64456	0.421828	20.2264	0.720811	17.8652	0.81109	0.166832	0.121644	0.18935	0.133531	5.36734	0.212317	3.04685	0.396461	0.00446401	0.0153984	0.194549	0.133706	0	0	0.0279869	0.0398582
Sol 789	398	42.5323	1.53414	1.58716	1.17264	2.47351	0.416379	20.1458	0.714861	17.3042	0.788376	0.158628	0.117807	0.116495	0.0993156	5.2877	0.20858	3.01728	0.401467	0	0	0.202723	0.137266	0.501628	0.14121	0.118791	0.0955632
Sol 789	399	40.9659	1.47861	0.298945	0.805745	1.639	0.350157	20.9289	0.742594	17.7621	0.8036	0.33087	0.164233	0.0339682	0.0548353	6.79433	0.265066	2.62377	0.397906	0	0	0.204388	0.137859	0.0507046	0.0526653	0.226008	0.204237
Sol 789	400	46.4376	1.672	1.09687	1.15376	2.30291	0.408117	19.1008	0.677803	18.3811	0.819713	0.206332	0.138837	0.0501166	0.0624982	4.03537	0.340835	3.03173	0.400957	0.0413088	0.0474227	0.161334	0.118738	0	0	0.07644	0.0672036
Sol 789	401	46.2606	1.6669	0.194042	0.793259	2.25073	0.402072	18.6624	0.663118	18.2193	0.811802	0.125404	0.099282	0.134189	0.108779	3.97755	0.347299	3.11435	0.399524	0.0937855	0.0792096	0.244616	0.150626	0	0	0.0459121	0.046752
Sol 789	402	46.3244	1.668	0	0	1.98502	0.387082	17.9749	0.638198	18.1721	0.812738	0.103838	0.120946	0.0827696	0.0884061	4.98796	0.201386	3.35668	0.391133	0.201675	0.137527	0.207737	0.139091	0	0	0.0118534	0.0267577
Sol 789	403	44.5565	1.60949	0.271723	0.766538	1.98626	0.384651	18.0541	0.642763	17.6236	0.791639	0.148363	0.112521	0.258538	0.143198	5.0161	0.288941	2.9708	0.569964	0.0659713	0.0594829	0.275699	0.15796	0	0	0.0176893	0.0329554
Sol 789	404	47.0897	1.69743	0.166477	0.784519	2.46115	0.411538	18.2815	0.649747	18.1752	0.810198	0.107878	0.0883831	0.18779	0.134253	3.65602	0.375409	3.16353	0.398525	0.0231384	0.0376166	0.257683	0.154104	0	0	0.0213254	0.0343207
Sol 789	405	47.4341	1.70861	0	0	2.33729	0.410397	19.6508	0.698653	18.0513	0.808397	0.167334	0.122118	0.06485	0.0750509	3.00668	0.402834	3.01277	0.402258	0	0	0.188461	0.131456	0	0	0.046004	0.0474939
Sol 789	406	45.5999	1.64274	0.945171	0.859904	1.89205	0.375421	21.0462	0.746881	17.9787	0.810035	0.515749	0.14447	0.0385324	0.0521264	4.30118	0.308983	2.69022	0.401017	0.0110335	0.0261922	0.294795	0.160924	0	0	0.750427	0.183372
Sol 789	407	44.2372	1.59461	0.633912	0.8325	2.2819	0.407134	20.6779	0.734364	17.1216	0.778514	0.524493	0.140917	0.188418	0.1322	4.53499	0.276119	2.83916	0.402058	0.010273	0.0252608	0.392087	0.158782	0	0	0.384046	0.217207
Sol 789	408	44.038	1.60059	2.0386	1.23716	2.055	0.393145	17.8334	0.636034	16.137	0.744084	0.168066	0.12215	0.190929	0.131834	4.13417	0.330261	3.09893	0.396656	0.0372207	0.0454957	0.170599	0.123591	0.0882849	0.0747759	0.0163142	0.0315207
Sol 789	409	38.6893	1.49473	0.874966	0.88408	2.18159	0.402265	17.834	0.666306	16.1306	0.787971	0.321142	0.15603	0.187858	0.13566	5.00468	0.28184	2.79436	0.40244	0.0650741	0.0672009	0.131561	0.138191	0	0	0	0
Sol 789	410	32.9831	1.70103	0.371141	0.763771	1.29695	0.304853	17.7687	0.641764	15.3688	0.72664	0.424609	0.152449	0.128761	0.109185	6.74715	0.314348	2.14509	0.470371	0.0576	0.0526644	0.178138	0.125957	0	0	0	0
Sol 789	411	37.3683	1.39128	0.208398	0.910018	1.40952	0.32262	26.2128	0.959182	16.6288	0.815258	0.370129	0.144573	0.0659488	0.0760861	6.9418	0.291178	3.22841	0.394959	0.00715015	0.0204212	0.279788	0.148348	0	0	0	0
Sol 789	412	30.4379	1.10832	0	0	1.37424	0.317394	30.7819	1.09158	16.4804	0.778146	0.307709	0.161853	0	0	4.62477	0.332036	3.83114	0.358102	0	0	0.326567	0.163377	0	0	0	0
Sol 789	413	32.1723	1.16954	0.467194	0.959777	1.00544	0.258726	29.9606	1.06237	16.0521	0.762635	0.37398	0.162764	0	0	4.72079	0.2469	3.51665	0.382773	0	0	0.361038	0.15783	0	0	0	0
Sol 789	414	31.6292	1.6277	0	0	1.09637	0.275668	32.121	1.13873	16.9026	0.796376	0.318561	0.228998	0	0	4.28784	0.31053	3.00844	0.570576	0	0	0.329226	0.228899	0	0	0	0
Sol 789	415	17.6041	0.657464	0	0	0.946248	0.253742	42.635	1.51289	18.1695	0.873621	0.321811	0.164156	0	0	7.99293	0.309942	3.8024	0.523164	0	0	0.438537	0.150762	0	0	0	0
Sol 789	416	18.5627	1.08567	0	0	0.78565	0.225874	47.0067	2.64545	15.5147	0.776525	0.34753	0.164007	0	0	7.65413	0.296836	4.44362	0.286272	0	0	0.5196	0.188072	0	0	0	0
Sol 789	417	21.3493	1.12087	1.51901	1.46744	0.998905	0.259296	32.3184	1.15327	13.7187	0.700361	0.516307	0.157332	0	0	7.95005	0.313087	3.57437	0.38124	0	0	0.399065	0.149318	0	0	0	0
Sol 789	418	17.8085	0.718071	0.810927	1.23234	0.771457	0.223729	46.6496	2.3488	15.0727	0.817138	0.546582	0.195742	0.0489001	0.0637751	6.87681	0.384043	3.81172	0.37347	0	0	0.55047	0.196311	0	0	0	0
Sol 789	419	27.7534	1.4335	0	0	0.797073	0.223113	34.1643	1.21137	17.093	0.80732	0.2018	0.1943	0	0	5.082	0.2842	2.80419	0.402042	0.0246	0.0562	0.3012	0.2289	0	0	0	0
Sol 789	420	38.8724	2.02981	2.73492	1.37413	1.14625	0.286255	32.4927	1.66358	15.3771	1.06211	0.275343	0.154674	0.00259772	0.0237951	4.80835	0.307595	3.4204	0.549961	0.0493076	0.0527988	0.286688	0.157783	0.00572622	0.0162937	0	0
Sol 789	421	39.0857	2.01959	0.388734	0.921673	1.12836	0.280884	31.4594	1.59365	16.4789	0.780166	0.332423	0.147233	0	0	4.82243	0.275059	2.98121	0.498265	0.0196794	0.0351148	0.380192	0.155435	0	0	0.0440918	0.0530306
Sol 789	422	35.7915	1.30136	2.79903	1.42616	0.958562	0.253343	35.3456	1.25468	17.5166	0.830256	0.422189	0.22831	0.0559547	0.0677057	4.65609	0.401776	2.5174	0.549945	0	0	0.423913	0.151489	0	0	0	0
Sol 789	423	58.1623	2.09085	0.890593	1.13814	0.593294	0.187884	22.9261	0.814595	12.5211	0.621255	0.831768	0.200541	0	0	5.05536	0.265221	1.41523	0.4132	0	0	0.36744	0.162919	0	0	0	0
Sol 789	424	74.2153	2.70175	0.979325	0.763912	0.345316	0.18921	7.81647	0.2853	9.02999	0.47449	0.19028	0.133011	0	0	3.13871	0.481462	1.40945	0.405209	0.0107273	0.0257968	0.093301	0.107759	0	0	0.015661	0.0294013
Sol 789	425	59.9505	2.27922	0.0364028	0.682794	0.850104	0.230522	6.18468	0.239249	12.6513	0.606334	0.0986485	0.0828736	0.113201	0.0972714	3.48873	0.36756	2.16481	0.376964	0.0694716	0.0681163	0.0799967	0.0694338	0.00106388	0.00562338	0.057112	0.0589187
Sol 789	426	33.5368	1.813	0.325791	0.730162	1.28537	0.419601	8.13457	0.434009	13.4109	0.913778	0.706832	0.174606	0.138398	0.111137	10.7273	0.411939	2.15024	0.52066	0.0491648	0.0644747	0.11306	0.127614	0	0	0.0720893	0.0886535
Sol 789	427	30.1767	1.09818	1.97093	1.17597	1.34459	0.309468	12.2185	0.43527	14.4918	0.682662	4.96076	0.209734	0.0346345	0.0544565	13.5961	0.521749	1.79371	0.345855	0.0224879	0.0334594	0.165125	0.120418	0.031418	0.0606488	0.0195326	0.0338431
Sol 789	428	32.1769	1.17635	0.390431	1.20531	1.50241	0.334828	23.5543	0.846671	17.2535	0.806848	0.968932	0.225694	0	0	7.51627	0.294904	2.5489	0.39444	0	0	0.314812	0.160424	0	0	0	0
Sol 789	429	34.4437	1.27047	0	0	1.29212	0.305268	24.9111	0.91363	17.5111	0.817805	0.4036	0.224535	0.0409903	0.0550956	10.078	0.557114	2.7349	0.403926	0	0	0.403996	0.153455	0	0	0	0
Sol 789	430	53.0073	2.70535	0.0971034	0.736732	0.500134	0.187996	15.7489	0.568365	13.1276	0.648152	0.170894	0.124089	0	0	14.4329	0.568607	1.53873	0.316408	0.00377629	0.0137457	0.205885	0.13816	0	0	0	0
Sol 789	431	45.5418	1.65264	0.156189	0.805669	0.497754	0.183099	16.1951	0.581256	14.6516	0.695916	0.117831	0.095278	0.0441004	0.058294	22.4899	0.856444	0.97128	0.233339	0	0	0.299367	0.152594	0	0	0	0
Sol 789	432	39.2293	1.50543	0.360512	0.798146	0.859386	0.261844	11.6405	0.463438	15.2745	0.758722	0.415723	0.151713	0.0686372	0.0806306	22.4517	0.916355	1.52376	0.316965	0.0152331	0.0319652	0.223767	0.146814	0	0	0	0
Sol 789	433	35.1699	1.46225	0.88919	1.29507	1.18989	0.305679	18.2007	0.735206	15.8367	0.854934	0.482595	0.169881	0.0307359	0.0491803	16.2731	0.719662	2.10694	0.462851	0.0242472	0.0386495	0.290303	0.20787	0	0	0.0672183	0.0757242
Sol 789	434	47.2168	1.70606	0.0761761	0.806564	0.644173	0.192316	23.2799	0.827045	11.7577	0.598912	0.256874	0.153635	0.0110569	0.0348219	6.82396	0.2692	1.49566	0.311001	0	0	0.215165	0.141885	0	0	0	0
Sol 789	435	47.4205	1.76884	0	0	0.610945	0.207747	15.7869	0.578362	7.9955	0.650198	0.2375	0.211245	0.0307337	0.0455227	7.1281	0.413566	1.60758	0.322168	0	0	0.363008	0.159144	0	0	0	0
Sol 789	436	37.7302	1.93197	0	0	1.21316	0.292148	26.9126	0.958233	14.1216	0.688401	0.705541	0.173766	0.041349	0.0541574	7.43499	0.408355	2.07662	0.372132	0	0	0.599372	0.151233	0	0	0	0
Sol 789	437	44.0017	1.58478	0.0283245	0.678738	0.736563	0.204188	9.62016	0.342894	10.239	0.518254	0.385696	0.161522	0.0264618	0.0399426	11.2166	0.610226	1.64731	0.3302	0.0242252	0.0372734	0.135538	0.104702	0	0	0	0
Sol 789	438	40.7577	1.4863	1.8723	1.15298	0.747529	0.209747	17.0455	0.611015	13.3533	0.658788	0.286181	0.159151	0	0	16.1041	0.622061	1.4111	0.298083	0	0	0.172382	0.122844	0	0	0	0
Sol 789	439	62.0137	2.35703	0	0	0.275119	0.179663	6.0476	0.351713	5.6439	0.419583	0.2087	0.139838	0.0574659	0.0702149	6.51322	0.290696	1.17455	0.267509	0	0	0.06788	0.0700701	0	0	0	0
Sol 789	440	50.5228	1.85725	0.659111	0.751344	0.358229	0.187885	11.9594	0.429371	7.08891	0.552163	0.222693	0.190325	0.089755	0.0911912	5.14321	0.288373	1.14339	0.351612	0	0	0.128891	0.137732	0	0	0	0
Sol 789	441	26.0626	1.38957	0.254493	0.832824	0.307225	0.174742	19.8599	1.02996	16.2764	1.09802	0.282637	0.159357	0	0	4.63718	0.259333	1.54279	0.448568	0	0	0.2429	0.150137	0	0	0	0
Sol 789	442	24.4602	0.908619	0.444987	0.82054	0.679029	0.280093	31.2874	1.10957	17.7659	0.827129	0.469661	0.140486	0	0	3.85356	0.343109	1.90689	0.355289	0	0	0.460196	0.145296	0	0	0	0
Sol 789	443	32.3086	1.17542	0.58854	0.910249	0.823705	0.225841	36.2217	1.28476	11.9894	0.635171	0.496181	0.192218	0	0	4.21331	0.319842	2.44505	0.392945	0	0	0.388519	0.222519	0	0	0	0
Sol 789	444	76.4002	2.72999	0.594351	0.667783	0.052168	0.0818218	6.94804	0.248198	3.17068	0.451072	0.114541	0.129423	0.00564775	0.0254399	3.18537	0.398041	0.955174	0.224745	0	0	0.0780646	0.0669863	0	0	0	0
Sol 789	445	83.6989	2.98446	0	0	0.0932883	0.107389	2.66876	0.397896	3.43709	0.439977	0.0082	0.0252011	0.0131783	0.0345691	3.30893	0.395306	0.5827	0.21118	0	0	0	0	0.00150103	0.00585404	0.0274706	0.0398712
Sol 789	446	75.8577	2.71068	0	0	0.317956	0.181984	3.00771	0.398422	5.46944	0.324821	0.0579786	0.0731959	0.0427843	0.0552585	6.52955	0.255148	1.00488	0.233907	0.0911735	0.0773391	0.0129237	0.0240721	0	0	0.0233967	0.0365851
Sol 789	447	50.1436	2.70818	1.73664	1.21497	0.611299	0.208471	20.6164	0.751471	12.601	0.628683	0.36712	0.163434	0.0191614	0.0405322	16.6387	0.945336	2.2232	0.54233	0	0	0.262	0.219652	0	0	0	0
Sol 789	448	31.8331	1.1602	0	0	0.45927	0.183987	30.7976	1.09176	16.0921	0.758977	1.05376	0.241062	0	0	16.0665	0.611864	1.32212	0.286233	0	0	0.672066	0.16638	0	0	0	0
Sol 789	449	50.3883	1.839	0	0	0.284645	0.18342	20.2266	0.723049	12.6447	0.625678	0.524758	0.228989	0	0	10.4998	0.406234	0.776646	0.191029	0	0	0.276987	0.241774	0	0	0	0
Sol 789	450	59.854	2.40269	0.189424	0.726951	0.380489	0.194762	12.9694	0.519096	13.3244	0.712654	0.357402	0.129714	0	0	6.50504	0.312259	0.677566	0.197387	0	0	0.158662	0.118132	0	0	0	0
Sol 789	451	38.6379	1.41171	0	0	0.187898	0.161198	24.444	1.23385	27.3147	1.16092	0.171856	0.16915	0	0	3.64891	0.372767	0.507197	0.143557	0	0	0.378435	0.147719	0	0	0	0
Sol 789	452	25.9422	0.950976	0.92591	0.867409	0.665265	0.195182	24.9448	1.26092	21.4938	0.950345	0.114301	0.129995	0	0	6.03745	0.236456	1.592	0.322913	0	0	0.328317	0.163551	0	0	0	0
Sol 789	453	26.0769	0.961648	0.953491	1.02428	1.24309	0.300775	38.1904	1.35726	17.2938	0.82284	0.166491	0.122056	0	0	4.57928	0.277569	3.07768	0.519388	0	0	0.421075	0.150669	1.36442	0.409724	0	0
Sol 789	454	17.9633	0.669402	0.549846	1.22403	0.637651	0.219499	50.7754	1.79857	16.6738	0.820421	0.332373	0.162074	0	0	4.69991	0.249301	4.70724	0.339752	0	0	0.733096	0.179126	0.000698434	0.00653534	0	0
Sol 789	455	13.6459	0.517223	1.25546	1.17628	1.08031	0.274927	48.6238	2.7402	16.2729	0.804967	0.605788	0.152485	0	0	7.0358	0.427219	4.5143	0.404065	0	0	0.619135	0.154919	0	0	0	0
Sol 789	456	27.1572	0.998206	1.96841	1.42098	2.95156	0.422519	32.7334	1.16208	16.0802	0.773053	0.743482	0.181839	0	0	8.26904	0.319672	3.77341	0.362276	0.218285	0.141748	0.344922	0.163954	0	0	0	0
Sol 789	457	29.468	1.08451	3.07428	1.4586	2.34974	0.413936	36.0157	1.29072	16.2876	0.784543	0.429613	0.15215	0	0	7.84372	0.308012	3.76198	0.362322	0	0	0.445715	0.147438	0	0	0	0
Sol 789	458	29.511	1.07757	0	0	1.79807	0.372466	35.9107	1.27411	16.7826	0.797452	0.516408	0.135499	0	0	5.125	0.202467	4.18577	0.31993	0	0	0.419807	0.155211	0	0	0	0
Sol 789	459	30.079	1.09652	0.832087	1.46104	0.861212	0.237942	40.2961	1.42778	16.8805	0.806397	0.353295	0.16174	0	0	4.01159	0.343163	4.12694	0.326552	0	0	0.461373	0.142231	0	0	0	0
Sol 789	460	45.2385	2.3052	0	0	0.585048	0.185421	30.4776	1.5277	15.4218	1.0368	0.196289	0.13566	0.0140461	0.0406529	5.56939	0.220851	3.58072	0.380026	0	0	0.313957	0.162717	0	0	0	0
Sol 789	461	33.2667	1.21971	2.05497	1.494	0.6713	0.205668	37.6358	1.33839	17.2193	0.820024	0.46713	0.149494	0	0	7.77865	0.304478	4.2382	0.313003	0.00800896	0.0218745	0.450813	0.146615	0	0	0	0
Sol 789	462	27.6046	1.00752	2.59165	1.42206	1.70938	0.509539	28.8226	1.53061	14.342	1.02448	0.398756	0.159553	0	0	9.16482	0.524335	5.01268	0.205023	0.773303	0.188511	0.34011	0.163284	0	0	0	0
Sol 789	463	16.9955	0.634949	1.98504	1.55924	1.00933	0.263658	44.614	1.58276	17.3837	0.84317	0.440475	0.150727	0.0365869	0.0503404	8.19238	0.318407	4.01763	0.340527	0	0	0.508415	0.138507	0	0	0	0
Sol 789	464	14.298	0.5466	1.67327	1.60808	0.751948	0.218053	47.6719	1.69812	16.4877	0.812964	0.385821	0.161428	0.0314632	0.0452701	6.57071	0.256781	4.55654	0.27241	0	0	0.703422	0.173361	0	0	0	0
Sol 789	465	15.4062	0.82105	2.54308	1.71366	0.665142	0.203428	50.0008	1.77121	15.1481	0.768098	0.355018	0.163885	0	0	5.46816	0.215024	4.82221	0.222427	0	0	0.859411	0.204508	0	0	0	0
Sol 789	466	18.9718	0.9964	1.10632	1.15046	0.7696	0.3159	47.4761	2.3785	16.023	1.1195	0.3561	0.2321	0	0	6.486	0.358	4.3664	0.4179	0	0	0.6924	0.2413	0	0	0	0
Sol 789	467	22.6422	0.852514	1.03738	1.02606	1.05859	0.272039	34.8941	1.24191	18.8662	0.891985	0.274631	0.150744	0.0110478	0.0334451	4.55545	0.630318	2.62247	0.484618	0	0	0.473722	0.153349	0	0	0	0
Sol 789	468	33.902	1.24148	0	0	0.495337	0.168209	26.6436	0.945113	25.5005	1.097	0.227759	0.197214	0	0	3.63989	0.373959	0.626633	0.158543	0	0	0.366787	0.144362	0	0	0	0
Sol 789	469	56.5146	2.13998	0.54588	0.754944	0.304442	0.179173	12.8041	0.468459	16.4473	0.77262	0.149106	0.153446	0	0	7.31634	0.29212	0.689032	0.18135	0	0	0.14275	0.109351	0	0	0	0
Sol 789	470	52.4515	1.95989	0.0851523	0.630318	0.352952	0.152463	7.4579	0.3759	6.2544	0.5213	0.1342	0.1475	0.0698507	0.0776344	6.6081	0.3645	0.5501	0.2012	0	0	0.112417	0.0919395	0	0	0	0
Sol 789	471	23.9998	1.2438	2.23376	1.31307	0.543177	0.191656	25.3278	0.902383	15.162	1.0389	0.349047	0.164829	0	0	13.8859	0.7491	1.66	0.4688	0	0	0.327764	0.163385	0	0	0	0
Sol 789	472	50.9803	1.85317	0	0	0.571286	0.177896	18.4494	0.996937	10.7133	0.559834	0.189315	0.132265	0	0	18.3604	0.704448	1.97853	0.490521	0	0	0.0830052	0.0984345	0	0	0	0
Sol 789	473	80.5881	2.88613	0	0	0.0629421	0.0970172	2.18211	0.537269	3.98	0.408076	0.0276025	0.0406337	0	0	5.03498	0.229403	0.654058	0.16475	0.00723054	0.0195623	0	0	4.9607e-05	0.00391895	0.0231906	0.0350682
Sol 789	474	79.8787	2.85227	0.296809	0.597428	0.337974	0.180674	3.83909	0.354498	4.55452	0.35964	0.00927207	0.0196568	0.0370441	0.0500773	3.1049	0.570916	0.9855	0.325931	0.000148804	0.00734101	0	0	0.00510158	0.0127736	0.0380282	0.0453812
Sol 789	475	85.8279	4.3264	0	0	0	0	1.9602	0.509	2.50601	0.43554	0.0102	0.0293	0	0	2.7137	0.5693	0.4496	0.2109	0	0	0	0	0.000501083	0.00410888	0.003	0.0136
Sol 789	476	59.6334	3.02751	0	0	0.397817	0.16699	7.44457	0.265381	8.17894	0.432055	0.254023	0.2154	0.0165988	0.0414454	4.27154	0.31259	1.72869	0.33906	0.0464921	0.0511329	0.0602529	0.05361	0	0	0.0214757	0.0329628
Sol 789	477	42.5031	1.59041	0.775035	1.02556	0.489671	0.18562	12.7279	0.64561	13.7742	0.672918	0.455634	0.165185	0.00642383	0.0270612	4.19147	0.328863	1.49456	0.312957	0	0	0.160055	0.118623	0	0	0	0
Sol 789	478	45.8375	1.7322	0.103164	0.698374	0.53479	0.195158	10.6188	0.381544	10.853	0.556469	0.234943	0.147446	0.030874	0.0440547	3.93645	0.343052	1.7341	0.337072	0	0	0.114344	0.0923913	0	0	0	0
Sol 789	479	57.5941	2.14518	0.201012	0.648029	0.268966	0.171602	6.86728	0.254183	6.40455	0.428372	0.177063	0.125828	0.0167166	0.041391	4.02655	0.338848	1.74794	0.335897	0	0	0.0913357	0.077115	0	0	0.000457304	0.00685955
Sol 789	480	56.6684	2.07913	0.0613656	0.627234	0.194931	0.153087	4.3462	0.301739	6.69001	0.383776	0.13574	0.105451	0	0	4.85411	0.294413	1.29253	0.282522	0.0139511	0.0275325	0.0390709	0.0450104	0	0	0.00480717	0.0141685
Sol 789	481	49.4221	2.54284	0.333825	0.930066	0.410183	0.171743	5.80405	0.297277	9.02347	0.661448	0.23675	0.146943	0.0449626	0.0572299	8.26789	0.32054	1.50904	0.312687	0.00425209	0.0138568	0.0533935	0.0491175	0	0	0.0270885	0.0398889
Sol 789	482	56.3731	2.859	0.905291	1.13293	0.481673	0.180178	14.2647	0.7165	12.4232	0.612471	0.347804	0.154838	0.0475727	0.0617307	7.188	0.3957	1.7067	0.4764	0	0	0.1341	0.1469	0	0	0.0180889	0.0319678
Sol 789	483	42.1516	1.56124	0.463752	0.818444	0.789519	0.218705	14.5324	0.525938	13.1266	0.640629	0.482241	0.174875	0.0306628	0.0532401	14.1558	0.560375	1.94266	0.3632	0.00316492	0.0122513	0.243474	0.149537	0	0	0	0
Sol 789	484	46.9225	1.73842	0.491288	0.814966	0.664272	0.193971	15.2476	0.560997	12.6426	0.62925	0.431301	0.157629	0	0	17.0124	0.668103	1.8786	0.502777	0	0	0.246353	0.149183	0	0	0	0
Sol 789	485	66.7912	2.41571	0.225876	0.723065	0.477722	0.174448	11.9644	0.603973	9.23619	0.488119	0.15091	0.113735	0.0526508	0.0654161	8.22826	0.321552	1.17753	0.264983	0	0	0.100738	0.0831554	0	0	0	0
Sol 789	486	42.627	2.17757	0.330718	0.78964	0.812482	0.221697	19.0542	0.676604	11.0609	0.817082	0.24763	0.219278	0	0	8.93497	0.488999	1.03522	0.342432	0	0	0.188959	0.131611	0	0	0	0
Sol 789	487	34.0861	1.34962	1.95922	1.11013	0.100556	0.196798	12.102	0.487767	12.7346	0.721782	0.673528	0.203982	0.0456447	0.0610127	20.9087	0.841762	1.34866	0.29348	0.0738176	0.0665925	0.190422	0.129161	0	0	0	0
Sol 789	488	27.8517	1.4403	2.06805	0.977	0.530469	0.184003	20.5269	0.729688	18.7691	0.853752	0.132	0.146001	0	0	29.5702	1.11729	0.952881	0.226626	0	0	0.2776	0.224004	0	0	0	0
Sol 789	489	29.0489	1.08842	0	0	0.587523	0.202694	25.9253	0.937998	18.3783	0.869879	0.277654	0.218209	0	0	19.0425	0.734342	1.6428	0.326423	0	0	0.324928	0.153593	0	0	0	0
Sol 789	490	31.2168	1.22935	0.707944	1.22151	1.01161	0.260304	24.5053	0.906033	17.4304	0.865557	0.350202	0.1572	0.0680983	0.0782879	10.9275	0.434143	2.37454	0.379113	0	0	0.336484	0.153094	0	0	0	0
Sol 789	491	25.1215	0.935033	0	0	1.15292	0.284313	29.9008	1.06532	17.0585	0.809698	0.78472	0.192076	0.0321782	0.0458465	9.78342	0.381173	2.18169	0.490723	0	0	0.43823	0.147958	0	0	0	0
Sol 789	492	29.9856	1.09577	1.11438	1.14081	0.97589	0.250557	14.6676	0.523097	13.83	0.666512	4.15037	0.336758	0.182366	0.133283	12.0244	0.465703	1.64736	0.329184	0.0169991	0.0323984	0.191282	0.13075	0.0264897	0.0395849	0	0
Sol 789	493	44.6627	1.60815	0.671437	1.04527	1.10146	0.270315	10.4353	0.528858	11.9999	0.585771	1.9354	0.358397	0.0692333	0.0803083	11.1565	0.608635	1.98343	0.364483	0.116262	0.0939625	0.0780995	0.0669597	0.000545335	0.00505675	0.0175093	0.0313147
Sol 789	494	52.1437	1.93539	0.018085	0.703215	1.06732	0.266471	9.57271	0.354331	11.9579	0.584271	0.231042	0.14748	0.0618768	0.0635754	7.46939	0.293804	3.38024	0.393671	0.611745	0.214859	0.096422	0.0827266	0	0	0.0393218	0.0455294
Sol 789	495	53.6109	1.96384	0.975374	1.08984	0.581779	0.200025	14.1007	0.713133	11.129	0.572491	0.188881	0.197624	0.0700974	0.0796425	5.5185	0.273379	1.60962	0.325551	0.0140139	0.0299434	0.177482	0.125967	0	0	0	0
Sol 789	496	48.7261	1.75636	0	0	0.653558	0.190239	12.9374	0.462946	12.9432	0.618611	0.258972	0.232179	0.115083	0.103463	7.66639	0.300287	1.50196	0.310078	0.0170671	0.0321824	0.144964	0.110044	0	0	0	0
Sol 789	497	22.2368	0.827623	3.56051	1.38486	0.88855	0.237496	26.9778	1.37858	13.3793	0.686326	0.312257	0.257395	0.0202971	0.0385299	7.27719	0.407893	2.31347	0.386485	0	0	0.269187	0.241645	0	0	0	0
Sol 789	498	27.1538	1.03388	1.43328	1.12691	0.981029	0.26058	36.6382	1.36388	14.9216	0.779282	0.470779	0.156563	0	0	5.44606	0.360638	2.8794	0.395788	0	0	0.42469	0.154064	0	0	0.0445974	0.0535366
Sol 789	499	33.8965	1.24103	0	0	0.934713	0.251423	28.4675	1.01662	15.0976	0.739226	0.208359	0.138455	0.0464764	0.0599867	6.33859	0.2651	3.06984	0.402029	0.0236807	0.0391517	0.278071	0.158472	0	0	0	0
Sol 789	500	35.9277	1.34293	1.46192	0.972572	0.754888	0.218296	28.0592	1.01956	16.4181	0.783448	0.252221	0.149998	0	0	5.09286	0.28601	2.9095	0.493914	0.0175764	0.0329775	0.325036	0.160793	0	0	0.00754109	0.0207253
Sol 789	501	25.913	1.35762	0.768468	1.05239	0.882331	0.238848	41.9936	1.498	16.9458	0.829741	0.395928	0.158838	0	0	4.52155	0.325968	2.9487	0.400003	0	0	0.4771	0.194635	0	0	0	0
Sol 789	502	20.8925	0.84639	0.204457	0.897744	1.18001	0.292577	25.0586	0.96531	14.5297	0.761612	0.577249	0.181	0.0438705	0.0586111	10.9314	0.444877	3.05032	0.410322	0.0102508	0.0261851	0.332858	0.153706	0	0	0	0
Sol 789	503	14.6316	0.7788	1.24754	1.14211	1.16096	0.286876	44.4898	2.2291	14.3358	1.0333	0.5731	0.2053	0	0	10.184	0.553	4.1063	0.4654	0	0	0.6402	0.2254	0	0	0	0
Sol 789	504	14.9343	0.571161	3.52644	1.67194	0.89855	0.244567	44.6398	1.58839	16.3448	0.820008	0.357706	0.158528	0	0	9.70875	0.377205	4.01901	0.343229	0	0	0.5338	0.14351	0	0	0	0
Sol 789	505	25.3227	0.963642	0.761033	1.06853	0.923839	0.247509	35.3344	1.26819	16.517	0.816607	0.364939	0.133649	0	0	5.04231	0.278101	3.1083	0.393361	0	0	0.441392	0.15434	0	0	0.0156701	0.0311402
Sol 789	506	27.6073	1.43093	0.128495	1.2356	1.05833	0.265484	22.6701	0.808156	13.6255	0.685882	0.258913	0.228171	0.0526748	0.0641767	3.74882	0.58455	3.34984	0.384329	0.0334341	0.0421991	0.338867	0.159403	0	0	0	0
Sol 789	507	28.9185	1.05756	2.0513	1.36396	1.09131	0.273397	31.5514	1.1188	15.708	0.761779	0.38038	0.155081	0.0639968	0.064225	5.32566	0.224247	3.54043	0.37859	0	0	0.389278	0.159025	0	0	0	0
Sol 789	508	35.5205	1.82636	0.684395	0.943467	1.06058	0.268831	31.0417	1.1024	17.2955	0.810107	0.286684	0.158163	0.0113903	0.0333929	4.28893	0.540598	3.08982	0.399708	0.00875363	0.0230464	0.501583	0.138326	0	0	0	0
Sol 789	509	32.8802	1.23299	0	0	1.28852	0.302531	31.7623	1.14676	17.8299	0.857953	0.19525	0.205826	0	0	3.9489	0.704155	2.45939	0.389126	0	0	0.505858	0.153345	0	0	0	0
Sol 789	510	28.8707	1.49635	0.773758	0.90066	1.3144	0.435234	22.3696	0.823886	15.5405	0.750298	0.396415	0.156846	0.0926211	0.0870268	4.96327	0.307381	2.10248	0.502391	0	0	0.344528	0.127085	0	0	0	0
Sol 789	511	39.1433	1.50431	0.86247	1.18323	1.94711	0.36648	17.4773	0.645682	15.2854	0.740081	0.253439	0.153522	0.108963	0.100093	4.5518	0.315779	2.86726	0.399831	0.0444263	0.050548	0.165935	0.122179	0	0	0.00240405	0.0103324
Sol 789	512	44.6749	1.61974	0.661612	0.824759	2.16252	0.399484	21.7135	0.77296	15.9403	0.739182	0.566883	0.143846	0.173843	0.128586	3.45934	0.384626	2.88414	0.400269	0.0167819	0.0319755	0.427375	0.153503	0	0	0.0421922	0.0471192
Sol 789	513	45.6103	2.3238	0.0138005	0.837699	1.78544	0.367741	24.485	1.2279	18.6533	1.1838	0.731046	0.179701	0	0	3.8559	0.5077	2.6567	0.5662	0.0376821	0.0467407	0.4861	0.1894	0	0	0.0737	0.0909
Sol 789	514	43.4379	1.56777	0.748967	1.1317	2.54315	0.420094	20.6015	0.732295	17.8999	0.806047	0.33308	0.1617	0.0655722	0.0738768	3.5645	0.382125	3.09572	0.400573	0.0079377	0.0213669	0.366398	0.16038	0	0	0.148235	0.112042
Sol 789	515	45.9864	1.65755	0.804185	0.845388	2.40639	0.414492	20.2392	0.718933	17.5915	0.794401	0.11644	0.093857	0.1146	0.100987	3.91388	0.353448	3.22174	0.396582	0.0171426	0.0321927	0.19754	0.135124	0	0	0.462321	0.144
Sol 789	516	45.1055	1.6298	0.527191	0.825106	1.75668	0.363564	19.5986	0.697252	17.2897	0.784179	0.157234	0.117113	0.236906	0.151867	5.89863	0.231563	2.88604	0.402062	0.0200147	0.0346699	0.327105	0.163523	0	0	0.215533	0.140406
Sol 789	517	46.5706	1.6863	0.339248	0.815312	2.30417	0.405751	19.1454	0.682375	18.323	0.82315	0.0895414	0.076551	0.234863	0.15198	3.62267	0.48046	3.10166	0.399221	0	0	0.193645	0.133803	0.0747127	0.0662804	0.114851	0.0941511
Sol 789	518	44.9036	1.62627	0.659017	0.819368	3.36141	0.413753	18.0047	0.642315	17.7483	0.798132	0.118207	0.0948838	0.15345	0.119233	3.2159	0.396447	3.38515	0.387776	0	0	0.177051	0.126274	0	0	0.203804	0.136384
Sol 789	519	43.51	1.56904	0	0	3.40836	0.4155	19.9957	0.709585	16.6836	0.763709	0.382324	0.161403	0.164272	0.122719	3.59447	0.379311	3.3857	0.389076	0	0	0.449946	0.199717	0	0	0.18969	0.132163
Sol 789	520	45.6132	1.64391	0.695132	0.843577	2.01722	0.387752	20.725	0.735422	15.7056	0.729462	0.316227	0.161164	0.20185	0.140224	3.51192	0.384533	3.1382	0.39629	0.0639181	0.057878	0.567998	0.143526	0	0	0.077329	0.0676708
Sol 789	521	47.3896	1.70827	0.181155	0.820435	1.7556	0.363625	21.0544	0.749395	16.8861	0.771737	0.427885	0.15334	0.14226	0.113637	4.1711	0.328306	2.90144	0.404609	0.19046	0.13272	0.491388	0.13959	0	0	0.0350288	0.0442474
Sol 789	522	45.4615	2.3158	0.787928	0.919969	1.81231	0.37187	18.4591	0.69176	18.3367	1.1634	0.4357	0.2144	0.13424	0.117688	6.9759	0.3841	2.9707	0.5687	0.083792	0.0826199	0.3847	0.2279	0	0	0.0173699	0.033062
Sol 789	523	27.5857	1.00904	1.69972	1.3208	1.48018	0.331573	32.9916	1.17385	19.0908	0.878632	0.471186	0.146118	0.0395374	0.0528017	5.19662	0.210305	2.08147	0.372606	0	0	0.3685	0.23034	0	0	0	0
Sol 789	524	32.4807	1.6731	0.496489	0.949161	1.33444	0.311329	32.7327	1.16059	16.0248	1.09518	0.353022	0.245196	0	0	4.28996	0.503682	2.86511	0.598361	0	0	0.444601	0.230743	0	0	0	0
Sol 789	525	32.9208	1.69371	2.88189	1.36747	1.25017	0.29771	31.7634	1.12582	14.3514	1.00308	0.387044	0.161038	0.0177288	0.0375052	3.95032	0.522754	3.31899	0.570446	0	0	0.359493	0.22427	0	0	0	0
Sol 789	526	37.6482	1.94174	1.40336	1.07856	1.42698	0.329563	33.8834	1.71092	16.683	0.812804	0.3356	0.232409	0.0366446	0.0517224	4.49618	0.332661	3.38368	0.468092	0	0	0.5199	0.187527	0	0	0	0
Sol 789	527	19.2998	1.04591	0.144896	1.01694	0.940464	0.251749	33.7946	1.21163	14.1815	0.744703	0.399756	0.147024	0.0645492	0.0749543	5.08341	0.317823	3.01073	0.373528	0	0	0.399384	0.159305	0	0	0	0
Sol 789	528	21.5994	0.829676	0.813787	1.06815	1.01597	0.267246	41.7241	2.10895	16.8405	0.84472	0.338451	0.266445	0	0	5.43018	0.287732	3.17744	0.410808	0	0	0.471787	0.16443	0	0	0	0
Sol 789	529	23.0188	0.849115	0	0	1.07781	0.270521	38.3479	1.35999	16.5569	0.795363	0.359503	0.239891	0	0	5.78544	0.228694	3.58231	0.378194	0	0	0.412252	0.151968	0	0	0	0
Sol 789	530	21.5107	0.812164	0.972339	1.03325	0.847976	0.23339	35.5927	1.27627	15.5293	0.77666	0.45634	0.151379	0.049931	0.0622905	7.10232	0.302442	3.7025	0.372944	0.0142387	0.0301651	0.443015	0.147999	0	0	0	0
Sol 789	531	26.1695	0.979032	0.371165	0.947845	1.04649	0.270581	35.4526	1.28658	16.5428	0.819349	0.486922	0.16538	0	0	8.05834	0.349931	3.33623	0.394999	0.056252	0.0648122	0.374588	0.155815	0	0	0	0
Sol 789	532	32.8115	1.1913	1.42671	1.31904	1.10222	0.275766	30.3464	1.53845	15.8383	0.755098	0.288859	0.225781	0	0	5.64288	0.316264	3.13544	0.398944	0	0	0.286181	0.224789	0	0	0	0
Sol 789	533	33.9349	1.27701	0	0	0.97922	0.259351	32.7983	1.19599	15.1146	0.755702	0.335067	0.129681	0.0646282	0.0762308	5.52336	0.314329	2.9359	0.407028	0	0	0.36328	0.20561	0	0	0.0399813	0.0490683
Sol 789	534	28.5189	1.06123	0.96774	1.35099	1.12352	0.276961	37.8822	1.34349	14.358	0.716963	0.32229	0.148472	0.0878389	0.0820106	4.70446	0.290058	2.95118	0.402254	0	0	0.494879	0.144403	0	0	0	0
Sol 789	535	26.012	1.00902	1.11715	0.975208	0.885554	0.242011	22.7856	0.908132	14.2042	0.715009	0.134	0.147318	0.0260926	0.0408784	5.08516	0.353967	1.79436	0.352901	0	0	0.234989	0.135712	0.0417176	0.0499471	0	0
Sol 789	536	20.6503	0.774565	0	0	0.310149	0.185311	21.1565	0.761673	17.1659	0.800464	0.194701	0.187451	0	0	5.53367	0.227979	0.946627	0.2236	0	0	0.239127	0.14984	0	0	0	0
Sol 789	537	25.475	0.934504	0.105839	0.819061	0.469069	0.182261	27.5047	0.977144	20.6342	0.922509	0.330232	0.221539	0	0	6.31378	0.35207	0.987908	0.329343	0	0	0.340175	0.243286	0	0	0	0
Sol 789	538	32.5507	1.18377	0	0	0.823274	0.226	22.1904	0.788514	15.6946	0.743164	0.406309	0.197096	0.026639	0.0406746	6.80195	0.265976	1.42187	0.439109	0	0	0.201429	0.200122	0	0	0	0
Sol 789	539	42.8709	2.53262	0.864438	1.10936	0.770901	0.21255	13.5509	0.484109	10.3453	0.53242	0.617	0.219877	0.15833	0.119159	6.9265	0.435657	3.56421	0.378453	1.20049	0.266649	0.129149	0.100982	0	0	0	0
Sol 789	540	41.4884	2.12536	0	0	1.11281	0.278145	20.7237	0.761868	11.9387	0.624843	0.483087	0.158626	0	0	9.63823	0.391758	4.46101	0.240869	1.79486	0.480549	0.2266	0.206103	0	0	0	0
Sol 789	541	31.1071	1.258	0.950997	1.1204	0.633417	0.223096	13.8507	0.556032	11.9371	0.698971	0.631308	0.19721	0.091629	0.0944794	10.0184	0.470386	1.53073	0.305067	0	0	0.270416	0.159499	0	0	0	0
Sol 789	542	42.4169	6.51784	0.647133	1.46472	1.28755	0.848105	17.2299	1.93236	14.3451	5.59928	0.965295	0.298058	0.144272	0.198936	10.9514	0.666114	2.07181	0.4324	0.00904258	0.027355	0.305045	0.180881	0	0	0.00346785	0.0154712
Sol 789	543	37.0196	2.12111	0.206723	0.849775	1.52752	0.451121	17.5748	0.904397	15.8287	1.71243	0.878219	0.271053	0.0922148	0.105955	10.8727	0.730963	2.3533	0.401984	0.01142	0.0297057	0.516178	0.176995	0	0	0.000583374	0.0105008
Sol 789	544	26.0232	1.35554	0.552599	0.813694	0.784932	0.243998	19.7344	0.711031	14.2865	1.03375	0.347126	0.278594	0	0	15.1517	0.59256	1.51766	0.474939	0	0	0.233933	0.230346	0	0	0	0
Sol 789	545	35.7207	1.30198	1.1258	1.08225	0.645955	0.187292	11.6139	0.413016	12.597	0.612118	0.354857	0.222045	0.0142022	0.0354054	14.3299	0.54811	1.73194	0.339801	0.0539198	0.0581647	0.141587	0.108182	0	0	0	0
Sol 789	546	37.87	1.48664	0.741274	0.897349	0.858774	0.238121	15.1832	0.625518	11.4296	0.624345	1.65162	0.444687	0.0505982	0.0648774	10.0967	0.417788	1.44415	0.310306	0	0	0.143981	0.11273	0	0	0	0
Sol 789	547	46.5232	2.3672	0	0	0.864278	0.272347	14.0883	0.583018	11.5408	0.67527	0.9068	0.3027	0.0958802	0.10345	11.9151	0.523628	1.4549	0.432	0	0	0.125411	0.114338	0	0	0	0
Sol 789	548	55.1484	1.9973	0.772316	0.965641	0.551066	0.171847	8.95944	0.319939	10.5435	0.532158	0.245959	0.201773	0.0553649	0.0672346	10.2391	0.559886	1.25121	0.275881	0	0	0.0859755	0.0726958	0	0	0.0191993	0.0326842
Sol 789	549	41.6676	1.50262	1.80935	1.2195	0.746834	0.210624	17.869	0.634632	14.3487	0.681378	0.293634	0.161058	0.0593079	0.0680368	16.8521	0.641127	1.7273	0.481763	0	0	0.255252	0.153508	0	0	0	0
Sol 789	550	26.3174	0.964343	2.02507	1.31167	0.545749	0.178551	16.5336	0.591315	15.7674	0.73629	0.312013	0.159755	0.0187134	0.0391646	19.7138	0.750485	1.96524	0.502226	0	0	0.222062	0.144144	0	0	0	0
Sol 789	551	32.1397	1.17044	0.979936	0.825611	0.508957	0.17054	13.843	0.491938	13.8046	0.655632	0.184971	0.130196	0.0422038	0.0540482	17.3789	0.660792	1.87251	0.35457	0	0	0.118149	0.0942811	0	0	0	0
Sol 789	552	35.1222	1.80137	0	0	0.382167	0.165433	15.4745	0.549638	12.4619	0.608949	0.359529	0.16323	0	0	9.6938	0.529051	1.53238	0.315684	0	0	0.141691	0.108239	0	0	0	0
Sol 789	553	49.5572	1.81758	0	0	0.452883	0.169994	12.0241	0.429444	11.4309	0.567533	0.226927	0.145816	0.0310037	0.0471722	7.2576	0.283314	1.64563	0.327262	0.00064452	0.00867623	0.0865424	0.0731038	0	0	0	0
Sol 789	554	61.7784	2.24003	0	0	0.507777	0.187962	4.50197	0.277273	7.75253	0.420011	0.0941803	0.0791275	0.00885676	0.0285833	4.65184	0.261299	1.69289	0.331561	0.0543401	0.0553077	0.0134082	0.0258479	0.00151195	0.00635021	0.0222932	0.0331129
Sol 789	555	64.5204	2.31085	0.105961	0.649913	0.388917	0.18252	7.797	0.278881	9.01594	0.467638	0.0877325	0.0747484	0	0	3.9919	0.345747	1.49348	0.310606	0.0556	0.0530766	0.0556278	0.0497803	0	0	5.00105e-05	0.00595125
Sol 789	556	58.0781	2.08412	0.0756912	0.662337	0.363744	0.176252	9.68774	0.490025	11.6289	0.799542	0.0778069	0.0946335	0	0	2.91785	0.403834	0.626634	0.158507	0	0	0.132272	0.144333	0	0	0	0
Sol 789	557	46.9537	2.4432	0.193521	0.965386	0.202886	0.160445	13.7274	0.706203	15.3528	0.998362	0.271604	0.154734	0	0	3.51554	0.386148	0.849483	0.285343	0	0	0.195806	0.193317	0	0	0	0
Sol 789	558	68.0124	2.43856	0	0	0.314586	0.183728	6.41054	0.22901	10.8972	0.530002	0.0968108	0.0807004	0	0	3.30326	0.39561	1.24817	0.274879	0.0220107	0.0344077	0.0405914	0.0623232	0	0	0.00879714	0.021743
Sol 789	559	90.8677	3.25033	0	0	0.193652	0.152055	3.13584	0.392572	3.718	0.430384	0.0222328	0.0352832	0	0	2.04213	0.497113	0.668876	0.168231	0.0104761	0.0239984	0	0	0	0	0.0299896	0.0423066
Sol 789	560	86.6988	3.12457	0	0	0.0716687	0.105652	2.6653	0.380394	2.46337	0.438293	0.130831	0.102332	0.0196693	0.0437645	2.52479	0.519276	0.384167	0.164299	0	0	0	0	0.00231545	0.00765106	0.0101173	0.0230757
Sol 789	561	78.2649	2.81827	0	0	0.040375	0.0748379	2.3826	0.389376	4.55689	0.36428	0.0838018	0.0714989	0	0	6.62261	0.260219	0.605297	0.154623	0	0	0.0294959	0.0368462	0	0	0.00226239	0.00988903
Sol 789	562	36.2159	1.34568	0.817687	1.15406	0.677559	0.195323	18.2381	0.919105	13.3908	0.659217	0.278496	0.157814	0	0	18.9992	0.729665	2.05566	0.369091	0	0	0.0562537	0.0561752	0	0	0.0073587	0.0197234
Sol 789	563	29.7544	1.09755	0.93421	1.23414	0.580932	0.198822	22.8127	0.812129	14.0845	0.703768	0.249267	0.147875	0.0783189	0.0856343	17.156	0.661388	1.67057	0.333935	0	0	0.191453	0.132749	0	0	0	0
Sol 789	564	61.5784	2.26347	0.34995	0.955706	0.404159	0.181514	7.38349	0.270826	8.54044	0.458439	0.1712	0.175208	0.0509585	0.0632577	13.1394	0.722396	1.0983	0.354971	0	0	0.0666394	0.068377	0	0	0.0257301	0.0331927
Sol 789	565	53.166	1.91657	0.36065	0.720163	0.370603	0.169214	15.5551	0.552537	16.5451	0.747724	0.167042	0.168636	0	0	5.75109	0.226537	1.03493	0.239427	0	0	0.197506	0.134972	0	0	0	0
Sol 789	566	33.9384	1.23147	1.54015	1.23983	0.939567	0.247145	28.6177	1.01682	18.3581	0.840022	0.262996	0.153008	0.0501424	0.062126	4.7211	0.24639	2.16536	0.531683	0	0	0.308185	0.161236	0.0829382	0.0998649	0	0
Sol 789	567	31.4811	1.14788	3.40274	1.4867	1.03245	0.265631	35.3511	1.25557	15.6839	0.76218	0.267873	0.153028	0.0474488	0.0602855	4.96334	0.207349	3.66996	0.485733	0	0	0.449331	0.146255	0	0	0	0
Sol 789	568	23.2854	1.22091	0.461275	0.989803	0.612928	0.195303	36.4779	1.29593	17.1607	0.815476	0.283572	0.159864	0	0	7.06664	0.277228	3.72034	0.368656	0	0	0.533296	0.135738	0	0	0	0
Sol 789	569	28.1048	1.02631	1.03922	1.43803	0.490828	0.172486	35.0202	1.24853	15.0634	0.737969	0.250786	0.152244	0	0	8.32916	0.322985	3.45525	0.376068	0	0	0.558662	0.141431	0	0	0	0
Sol 789	570	25.4043	1.31801	0.700577	0.990547	0.496791	0.168807	33.8664	1.20102	17.4456	0.818069	0.267184	0.15685	0	0	9.55377	0.36835	2.96049	0.401819	0	0	0.467654	0.14482	0	0	0	0
Sol 789	571	28.846	1.06333	1.25833	1.36711	0.716209	0.219871	28.2178	1.00664	13.9142	0.953627	0.289195	0.161446	0.0118524	0.0333166	14.1568	0.542494	4.36992	0.327372	1.31341	0.39384	0.404922	0.155467	0	0	0	0
Sol 789	572	21.2557	0.786081	2.43725	1.40417	0.602144	0.183277	27.7731	0.985543	15.193	0.730981	0.870401	0.207247	0.00626909	0.0265691	22.6596	0.857699	3.92609	0.349512	0.883567	0.210382	0.32203	0.163514	0	0	0	0
Sol 789	573	32.3375	1.6577	0.941178	1.24474	0.7266	0.207176	21.0216	1.0547	13.8264	0.668193	1.01788	0.234772	0	0	15.658	0.8427	2.7346	0.402641	0	0	0.242481	0.150481	0	0	0	0
Sol 789	574	20.4673	0.763994	1.0001	1.33781	1.24094	0.296839	31.979	1.15155	17.9915	0.849312	1.03941	0.239346	0	0	13.8883	0.532104	2.29803	0.387664	0	0	0.408544	0.148082	0	0	0	0
Sol 789	575	25.5095	0.932239	1.28738	1.27595	0.856815	0.232936	26.6304	0.944263	18.1449	0.832163	0.834598	0.20005	0	0	20.1976	0.765853	2.10082	0.372332	0	0	0.335223	0.163883	0	0	0	0
Sol 789	576	36.8325	1.33262	1.18866	0.949749	0.687809	0.201138	29.2085	1.03594	16.2434	0.762149	0.297754	0.161719	0.0125491	0.0351476	12.725	0.486408	2.59728	0.398902	0.000797117	0.00981451	0.450893	0.145622	0	0	0	0
Sol 789	577	25.7143	0.941335	0	0	0.356093	0.180832	31.5604	1.12024	16.3325	0.7771	0.362013	0.157748	0.0309491	0.0446055	14.1326	0.540655	3.06584	0.401769	0	0	0.443598	0.149861	0	0	0	0
Sol 789	578	21.0119	0.775596	1.9239	1.48286	0.781707	0.219972	38.688	1.37122	16.6882	0.804953	0.268534	0.155308	0.0157744	0.0379884	10.4563	0.401647	3.38087	0.390055	0	0	0.550278	0.168706	0	0	0	0
Sol 789	579	17.3357	1.01486	2.69648	1.53676	0.849273	0.231559	42.1814	1.50167	15.7438	0.781392	0.31744	0.161412	0.0263064	0.0398616	7.0428	0.426417	3.3808	0.558075	0	0	0.5177	0.187364	0	0	0	0
Sol 789	580	28.6387	1.11437	3.25991	1.40069	0.969199	0.251306	23.3046	1.18885	11.2635	0.80767	0.341937	0.164481	0.0362582	0.0496223	6.14001	0.24339	2.45691	0.515522	0	0	0.279116	0.201504	0	0	0	0
Sol 789	581	44.2684	1.65441	0.174739	0.754877	0.541015	0.168194	14.491	0.733972	11.5702	0.578282	0.247762	0.151987	0.109849	0.0952668	7.77358	0.304217	1.57497	0.441289	0	0	0.251927	0.153143	0	0	0	0
Sol 789	582	49.9231	1.79325	0.417461	0.736736	0.285382	0.178982	16.7358	0.594047	11.6847	0.577432	0.1856	0.130498	0.00839806	0.0295432	10.7045	0.411002	1.61987	0.326525	0	0	0.220039	0.143464	0	0	0	0
Sol 789	583	42.1771	1.52938	0.206465	0.774983	0.555954	0.17292	22.8558	0.811897	13.4684	0.656537	0.231806	0.146558	0.0192432	0.0394361	14.9522	0.570194	1.61615	0.326258	0	0	0.226595	0.144206	0	0	0	0
Sol 789	584	35.6808	1.30161	0.824973	1.15346	0.727951	0.205373	17.3346	0.616351	15.6588	0.729622	0.188774	0.132055	0	0	17.0466	0.922277	2.07447	0.3733	0	0	0.122169	0.0977008	0	0	0.038012	0.0464785
Sol 789	585	45.1712	1.66909	0	0	0.651704	0.211447	12.3821	0.44588	14.1988	0.679536	0.186889	0.131607	0	0	12.2282	0.474499	1.97609	0.364322	0.0217664	0.034176	0.109551	0.0902481	0	0	0.00722768	0.0193418
Sol 789	586	68.8314	2.46766	0.0791591	0.679596	0.348769	0.187158	11.0941	0.559716	9.0396	0.471311	0.0948869	0.0794418	0.0232658	0.0447456	5.63673	0.222474	1.44374	0.304026	0.00315756	0.012129	0.277451	0.13306	0	0	0	0
Sol 789	587	82.3645	4.27643	0	0	0.120204	0.127874	8.2249	0.426161	7.14761	0.397342	0.0676	0.0843041	0.0214535	0.0397628	3.0929	0.569559	1.1943	0.376884	0.0434987	0.0476177	0.102246	0.0856919	0	0	0.0005	0.0124
Sol 789	588	68.2848	2.45672	0.232046	0.643715	0.465086	0.17279	7.46611	0.267629	10.3661	0.514356	0.00697104	0.0167152	0	0	2.65283	0.401882	2.02145	0.367461	0.138048	0.106959	0.0667281	0.0594687	0	0	0.0278538	0.0401876
Sol 789	589	46.9405	2.66423	0	0	0.465457	0.183167	12.0823	0.679656	13.6892	0.964068	0.0993974	0.0829185	0	0	3.37831	0.55173	1.51195	0.442011	0.0446166	0.0496546	0.139494	0.151784	0	0	0.00159508	0.00807508
Sol 789	590	30.3565	1.60567	0	0	0.0561726	0.138752	22.8698	1.18228	22.1305	1.37213	0.0798257	0.0754273	0	0	2.4322	0.394621	0.317009	0.207791	0	0	0.351713	0.250351	0	0	0	0
Sol 789	591	39.5507	1.44663	0.721042	1.00215	0.0634038	0.0943058	23.0613	0.823794	24.8886	1.53243	0.0744047	0.0900041	0	0	2.42338	0.393237	0.299151	0.16278	0	0	0.340738	0.204849	0	0	0	0
Sol 789	592	59.7281	3.20047	0.4863	0.912606	0.340486	0.182227	8.80696	0.319274	13.4755	0.658365	0.1073	0.123914	0.014514	0.0399174	4.65367	0.281326	0.7464	0.260126	0	0	0.1031	0.119514	0	0	0	0
Sol 789	593	51.4025	2.61332	0	0	0.319768	0.172248	17.682	0.627794	10.9496	0.552054	0.186233	0.130688	0	0	6.25868	0.244962	1.51848	0.442028	0	0	0.210341	0.139919	0	0	0	0
Sol 789	594	47.0511	1.6963	0.14779	0.724042	0.467668	0.179053	13.4168	0.477672	11.9863	0.584222	0.341249	0.164063	0	0	10.264	0.397053	1.54859	0.317814	0.00085089	0.00895937	0.156168	0.116053	0	0	0	0
Sol 789	595	56.7395	2.05222	0.248	0.688354	0.304213	0.173238	9.88089	0.352281	9.01715	0.471702	0.261905	0.155691	0.0130792	0.034928	12.6126	0.48342	1.00728	0.234756	0	0	0.0592106	0.0525058	0	0	0	0
Sol 789	596	43.5381	2.23821	0.264412	0.651587	0.351862	0.177301	6.17106	0.315176	6.56682	0.541815	0.117207	0.0943307	0.0224052	0.0389463	13.3877	0.525238	0.916648	0.218215	0	0	0.024362	0.0531721	0	0	0	0
Sol 789	597	26.5666	0.988348	0	0	0.760588	0.211118	18.0843	0.642215	14.2964	0.684691	0.3488	0.232308	0.0439885	0.056291	16.8006	0.639004	1.4807	0.309168	0	0	0.19493	0.134129	0	0	0	0
Sol 789	598	23.6463	0.87279	1.42525	1.29976	0.966266	0.251381	25.9927	0.922814	17.1162	0.799603	0.737365	0.181121	0.0460723	0.0592774	16.1935	0.61923	1.7639	0.503042	0	0	0.282109	0.159601	0	0	0	0
Sol 789	599	43.5935	1.62101	1.16591	0.834123	0.862223	0.229773	10.5064	0.536111	12.8229	0.624862	0.705084	0.174059	0.0548583	0.0676251	14.5163	0.559806	1.5595	0.320048	0.0120827	0.0277192	0.148413	0.112293	0	0	0	0
Sol 789	600	41.1024	1.49543	1.04702	0.797108	1.21186	0.288542	10.9077	0.388595	9.5344	0.501802	1.3244	0.284945	0.0351798	0.0485722	10.2162	0.591962	1.03795	0.240382	0.00940209	0.0236052	0.113326	0.0911979	0	0	0.0693191	0.0641658
Sol 789	601	40.5993	1.46349	0.0885531	0.702413	0.623518	0.182343	11.0445	0.557977	8.77067	0.664124	0.490329	0.141113	0.0303706	0.0435796	12.1888	0.4667	1.21301	0.270018	0.0021963	0.0105322	0.121003	0.0962147	0	0	0	0
Sol 789	602	44.486	1.65963	1.00544	1.10816	0.242972	0.156746	11.9663	0.442464	12.2408	0.63378	0.269432	0.145895	0	0	18.5379	0.73372	1.71622	0.338671	0.023698	0.0346975	0.0923674	0.0841617	0	0	0	0
Sol 789	603	36.8012	1.40934	0.109723	0.72848	0.342093	0.15114	15.3086	0.574458	13.1426	0.714021	0.497012	0.168094	0	0	21.2567	0.849568	1.85939	0.346148	0	0	0.273397	0.147729	0	0	0	0
Sol 789	604	42.8731	1.7499	1.74064	1.14428	1.19432	0.328614	27.6371	1.3916	18.3879	0.984539	1.22362	0.371743	0.0735224	0.0861847	11.5727	0.51297	2.25391	0.362661	0	0	0.81159	0.271444	0	0	0	0
Sol 789	605	49.7374	6.73507	1.44313	1.93997	1.22785	1.63768	18.3423	1.46105	17.1255	6.99496	0.896531	0.297494	0.259468	0.305388	8.59707	1.57131	3.2452	0.457427	0	0	0.446843	0.190846	0	0	0	0
Sol 789	606	41.4748	6.32413	0.515649	1.24674	0.884741	1.01543	16.8304	0.846489	14.3533	7.06608	0.677675	0.295856	0.220191	0.303428	11.5845	1.76763	2.57942	0.505896	0	0	0.250312	0.211879	0	0	0	0
Sol 789	607	30.5781	1.6007	1.07787	0.798821	0.749557	0.235952	13.6895	0.532166	12.1915	0.694278	0.284766	0.116164	0.131679	0.111748	6.03508	0.926467	1.99387	0.348535	0.031369	0.0427675	0.234863	0.150354	0	0	0.0150235	0.0299508
Sol 789	608	47.6154	2.48831	0.446143	0.804685	1.14387	0.279522	17.637	0.910145	13.5852	0.653435	0.286	0.226526	0.0947732	0.0856291	5.49166	0.262601	3.02804	0.401897	0.135521	0.105469	0.238916	0.145012	0	0	0.0137477	0.0289505
Sol 789	609	47.5796	1.72685	0.815849	0.819984	0.631675	0.187694	21.7602	0.794501	11.1284	0.582333	0.284962	0.218107	0.0828224	0.0825778	4.56764	0.311718	2.3721	0.388811	0	0	0.285361	0.142178	0	0	0	0
Sol 789	610	32.632	1.68914	0.49747	0.875431	0.999197	0.265542	36.4555	1.84093	15.426	0.770292	0.5005	0.182027	0.0905418	0.0961408	6.5138	0.361695	2.8729	0.569483	0	0	0.476072	0.165833	0	0	0	0
Sol 789	611	27.3254	0.99905	0.0861511	0.799748	0.362418	0.181254	26.7921	0.950224	21.3207	0.94303	0.245644	0.210504	0	0	4.96663	0.244379	0.773431	0.268602	0	0	0.358241	0.162326	0	0	0	0
Sol 789	612	25.2767	1.3085	0	0	0.2165	0.2424	22.7092	1.139	20.1664	0.916721	0.0886	0.1062	0	0	3.8874	0.5031	0.5203	0.1898	0	0	0.2415	0.2123	0	0	0	0
Sol 789	613	24.2307	0.922467	1.08387	0.918982	0.816211	0.223918	23.4904	0.877534	14.2773	0.709317	0.393	0.145038	0.0534821	0.0659875	5.92997	0.309766	1.92519	0.364623	0	0	0.294692	0.146579	0	0	0.0331797	0.0419456
Sol 789	614	25.3435	0.964404	0.507027	0.869881	1.13713	0.280949	22.95	1.17326	13.6874	0.704535	0.445708	0.31389	0.0285723	0.0436419	7.21571	0.406769	2.48174	0.374462	0.0216539	0.0331444	0.346273	0.173124	0	0	0	0
Sol 789	615	34.7243	1.32015	1.53718	1.29668	1.26493	0.301542	26.4845	0.976293	16.0769	0.777654	0.27391	0.129337	0	0	6.04932	0.308998	3.06703	0.387397	0.057831	0.0664036	0.385059	0.160476	0	0	0	0
Sol 789	616	27.2254	1.00708	0	0	1.42059	0.323937	37.3974	1.32927	17.2641	0.816493	0.391255	0.21292	0	0	5.08317	0.200747	3.35417	0.390538	0	0	0.407292	0.152542	0	0	0	0
Sol 789	617	28.7455	1.04901	1.10094	1.32519	1.11807	0.277547	34.8897	1.23725	17.6189	0.827024	0.462	0.14237	0	0	5.86621	0.230074	2.93177	0.401855	0	0	0.367345	0.162488	0	0	0	0
Sol 789	618	25.3271	1.31783	2.80358	1.4169	1.15901	0.284413	34.4511	1.22499	14.4586	1.04375	0.422921	0.252408	0.110999	0.103854	5.69917	0.317924	2.95815	0.398812	0	0	0.3141	0.249096	0	0	0	0
Sol 789	619	21.2951	0.819878	0	0	1.11932	0.281762	38.813	1.96462	15.5678	0.784411	0.963452	0.228303	0.0246002	0.0419291	6.3772	0.275856	3.22834	0.456499	0	0	1.15246	0.25955	0	0	0	0
Sol 789	620	20.1669	0.746748	0	0	1.04876	0.26704	42.9342	1.52125	15.7948	0.778287	0.431587	0.149349	0	0	4.81837	0.23013	3.20715	0.394578	0	0	0.714631	0.176581	0	0	0	0
Sol 789	621	30.0675	1.10636	0.932746	1.40151	1.37456	0.317704	33.2981	1.18338	16.0464	0.772125	0.304584	0.221072	0.028443	0.0422013	3.81276	0.362914	3.31989	0.391989	0	0	0.708462	0.174086	0	0	0	0
Sol 789	622	26.336	0.971702	1.96942	1.42578	1.32649	0.310819	39.1936	1.39097	17.1354	0.820527	0.365258	0.215558	0	0	3.56662	0.380672	3.51375	0.383573	0	0	0.399486	0.154783	0	0	0	0
Sol 789	623	28.7342	1.07124	1.60153	1.43731	1.06899	0.270933	40.4127	2.04038	16.9019	0.831904	0.6573	0.231336	0	0	5.53737	0.318141	3.13964	0.404115	0	0	0.4851	0.190124	0	0	0	0
Sol 789	624	29.026	1.05872	0	0	1.63381	0.351265	28.8012	1.02311	16.1637	0.767496	0.912645	0.215251	0.0593198	0.0667277	8.01183	0.439751	2.45529	0.581543	0	0	0.350543	0.154537	0	0	0	0
Sol 789	625	39.4705	1.42647	1.55188	0.884134	2.05132	0.390731	18.7768	0.66943	15.4636	1.01169	0.352163	0.163337	0.0907618	0.0864989	6.49819	0.25413	2.87887	0.401756	0.0221604	0.0372973	0.380161	0.161136	0	0	0.0142398	0.0277575
Sol 789	626	45.0636	1.63689	0	0	2.45434	0.412411	20.063	0.715687	16.9363	0.775316	0.287983	0.159912	0.184074	0.133084	4.52788	0.27798	3.23238	0.394959	0.0778197	0.0702808	0.551742	0.151264	0.0274355	0.034815	0.0577551	0.0608637
Sol 789	627	45.2563	1.64486	0	0	1.68148	0.353589	18.5483	0.660371	17.1715	0.784054	0.215914	0.142437	0.245336	0.148189	4.16913	0.32336	3.13887	0.396374	0.104349	0.0863757	0.984496	0.228024	0	0	0.0496039	0.0541072
Sol 789	628	43.8178	1.6029	1.90262	0.931926	2.52969	0.418986	18.7047	0.666207	16.8019	0.781062	0.211579	0.140777	0.318398	0.162665	3.8498	0.361047	3.32125	0.393269	0.0283827	0.0424623	0.84534	0.201931	0	0	0.24118	0.150629
Sol 789	629	41.9612	2.23616	0.3608	1.58081	3.31715	0.418355	18.3302	0.650587	16.324	0.750815	0.142008	0.108777	0.127912	0.10522	3.0472	0.571345	3.3036	0.55854	0	0	0.288417	0.158872	0	0	0.155524	0.115976
Sol 789	630	45.6052	1.64235	0.550934	0.796889	3.30918	0.410929	19.0261	0.675292	17.1837	0.778379	0.076762	0.0669797	0.204862	0.14154	3.10378	0.401401	3.23698	0.395505	0	0	0.117442	0.0939763	0.0524295	0.0491438	0.192308	0.133215
Sol 789	631	45.2904	1.65594	0	0	3.1141	0.417785	17.9902	0.645182	17.3198	0.794772	0.0845239	0.0734434	0.170761	0.118946	3.14397	0.504484	3.27833	0.489988	0	0	0.283852	0.160615	0	0	0.253826	0.148301
Sol 789	632	44.8127	1.65502	0	0	3.25048	0.408659	16.3783	0.592082	16.9887	0.792036	0.124355	0.0990364	0.168831	0.124406	3.06437	0.405445	3.36365	0.384767	0	0	0.334806	0.16517	0	0	0.13735	0.106712
Sol 789	633	45.8637	1.71937	0.156261	0.838113	2.37761	0.401952	17.5275	0.638589	16.7194	0.79166	0.219494	0.143779	0.148192	0.119143	3.59538	0.386379	3.28372	0.386324	0.0317851	0.0446257	0.261659	0.156615	0	0	0.0209771	0.0341393
Sol 789	634	35.8347	1.8795	0	0	1.21821	0.413994	17.717	0.641397	13.1229	0.911797	0.156426	0.116393	0.237348	0.136717	5.12877	0.237069	3.05773	0.386568	0.0786671	0.0687517	0.385093	0.14774	0	0	0.0384775	0.0470949
Sol 789	635	46.236	1.72171	0.634272	0.801546	2.95418	0.388487	17.4117	0.635206	17.6819	0.814099	0.158287	0.117723	0.121015	0.101491	2.98778	0.501363	3.37854	0.381725	0	0	0.414644	0.148841	0.137167	0.106272	0.135918	0.106594
Sol 789	636	46.2388	1.67496	0.442225	0.796168	3.15086	0.420582	17.5855	0.625352	16.7613	0.769025	0.156817	0.116613	0.100813	0.0895844	3.32058	0.392513	3.23181	0.396108	0.00639054	0.0187223	0.397646	0.155658	0.00459792	0.0134939	0.0864645	0.0744285
Sol 789	637	40.508	1.46804	0.667859	1.12891	2.56587	0.42056	18.9152	0.673051	16.538	0.765806	0.80579	0.194516	0.01875	0.0392001	5.67196	0.223809	2.9841	0.401229	0.0032344	0.0130371	0.32586	0.163478	0	0	0.0368965	0.043532
Sol 789	638	28.1798	1.0429	0.13211	0.933301	1.54677	0.342349	30.2774	1.09693	16.1884	0.796693	1.14968	0.258707	0.0213494	0.0410219	7.17198	0.297994	2.38648	0.390665	0	0	0.393063	0.155314	0	0	0	0
Sol 789	639	19.7471	0.732159	0	0	0.999132	0.258765	40.8415	2.07204	15.7373	0.776753	0.41733	0.154829	0	0	3.82966	0.361376	3.07149	0.399539	0	0	0.547427	0.142839	0	0	0	0
Sol 789	640	23.3154	0.877557	2.27756	1.0738	1.11446	0.278664	41.4778	1.48085	15.6977	0.790495	0.416487	0.148425	0	0	3.56307	0.380208	3.66649	0.368621	0	0	0.570453	0.144148	0	0	0	0
Sol 789	641	25.0443	0.964342	2.93055	1.53172	1.21632	0.297585	39.7309	1.42834	14.4703	0.772963	0.471198	0.163358	0.0187516	0.039809	4.9937	0.333883	3.82586	0.317459	0	0	0.845569	0.212307	0	0	0	0
Sol 789	642	26.6168	1.11976	1.05931	1.41379	1.5395	0.348673	30.8038	1.56164	16.101	0.892586	0.659553	0.208088	0.126441	0.116253	7.37529	0.4324	3.25872	0.398848	0	0	1.3186	0.290426	0	0	0.127056	0.113423
Sol 789	643	26.065	0.993679	0	0	1.41928	0.324152	26.1562	0.959044	14.4836	0.982315	0.843909	0.21963	0.0502045	0.0635771	9.57112	0.394721	2.34641	0.48322	0.0170272	0.0331695	0.447495	0.159019	0	0	0	0
Sol 789	644	30.7712	1.12034	0	0	1.30069	0.30421	23.6028	0.837271	15.2202	0.722974	0.65037	0.22905	0.0307924	0.0438893	7.25826	0.282047	2.97617	0.40133	0.00910553	0.0235849	0.287325	0.15095	0.0700452	0.0863325	0	0
Sol 789	645	33.9816	1.74329	1.55956	1.20428	0.941527	0.246065	18.6543	0.663655	14.854	0.701404	0.29322	0.22095	0.024606	0.0379825	5.22529	0.206166	3.05619	0.400558	0.0320038	0.039919	0.169907	0.12271	0.0518733	0.066255	0	0
Sol 789	646	28.7463	1.10319	1.9598	1.38686	1.19099	0.298681	26.8106	1.0124	14.7279	0.748554	0.325542	0.165492	0	0	6.5225	0.315172	2.83472	0.506679	0.0302813	0.0393456	0.3298	0.231708	0	0	0	0
Sol 789	647	27.3691	1.42037	2.26936	1.22463	1.32301	0.307987	20.8814	0.75735	15.2148	0.733951	0.61483	0.158065	0	0	9.3687	0.36832	2.26413	0.385565	0.0149617	0.031098	0.283297	0.221488	0	0	0	0
Sol 789	648	29.7141	1.5294	0.4475	1.4557	0.941971	0.25374	24.6479	1.2359	23.1935	1.4108	0.5228	0.1891	0	0	8.6253	0.4705	1.0564	0.3428	0	0	0.3042	0.2292	0	0	0	0
Sol 789	649	28.9399	1.05916	0.739372	0.807484	0.460012	0.175516	29.0667	1.03057	25.6109	1.11252	0.177165	0.126641	0	0	4.09459	0.335639	0.48236	0.141821	0	0	0.404204	0.157705	0	0	0	0
Sol 789	650	24.4694	1.29506	0	0	0.527858	0.165409	22.8391	1.17242	17.2036	1.13419	0.348957	0.156607	0	0	4.09259	0.330053	0.960867	0.314479	0	0	0.316747	0.227682	0	0	0	0
Sol 789	651	26.9216	1.03674	2.03473	1.35995	0.935604	0.250504	30.172	1.11806	13.4341	0.725238	0.422308	0.17602	0.113703	0.101581	4.5998	0.324038	2.73492	0.376691	0	0	0.344289	0.129564	0	0	0	0
Sol 789	652	35.1625	1.30077	0.74315	1.17781	0.993672	0.256006	26.5892	0.954578	15.9031	0.757007	0.302861	0.218207	0.124829	0.10439	4.43282	0.308573	2.96087	0.401372	0	0	0.311111	0.162345	0	0	0.0724724	0.0778635
Sol 789	653	40.5364	1.47676	0.0245634	0.762014	1.47611	0.328283	17.1712	0.613568	15.5819	0.734286	0.400835	0.250609	0.0287839	0.0504403	4.69968	0.309371	3.31871	0.389598	0.0265564	0.0353223	0.356483	0.163598	0	0	0.0735395	0.0717326
Sol 789	654	32.4732	1.40345	0.592778	0.937269	1.20217	0.319707	9.58796	0.494254	13.7761	0.908221	0.959901	0.252571	0.0858829	0.0868305	3.78954	0.972681	2.88821	0.305155	0.019011	0.0319373	0.15753	0.117824	0	0	0.0621259	0.0696913
Sol 789	655	46.0428	2.14267	0.0302394	1.13465	1.29994	0.400892	28.3157	1.42695	17.4194	1.78032	0.474264	0.162765	0.159964	0.137459	4.8481	0.416913	3.32461	0.319325	0	0	0.481992	0.163348	0	0	0.0120656	0.02995
Sol 789	656	46.0196	1.77996	0	0	1.16441	0.290404	26.5274	0.986134	16.0472	0.837868	0.751126	0.204176	0.0447099	0.0585007	4.12557	0.32703	2.46406	0.363624	0	0	0.547885	0.179936	0	0	0	0
Sol 789	657	44.9175	1.64012	0.87127	1.19052	0.774155	0.216174	23.9577	0.85175	15.493	0.738825	0.73592	0.180651	0.0234529	0.0394662	7.00705	0.275553	1.5735	0.470357	0	0	0.452546	0.145073	0	0	0	0
Sol 789	658	40.0708	2.12527	1.00224	1.20588	0.45708	0.186239	21.4606	1.1202	13.9241	0.971282	0.4939	0.185737	0	0	13.8382	0.773196	1.3504	0.41256	0	0	0.409624	0.157036	0	0	0	0
Sol 789	659	62.6589	2.25035	0.523321	0.680646	0.288759	0.177132	10.1288	0.36123	9.72278	0.503278	0.291953	0.158608	0	0	13.901	0.533717	0.976666	0.230094	0	0	0.108421	0.0884441	0	0	0	0
Sol 789	660	59.2445	3.02001	0	0	0.306366	0.182003	14.7889	0.527036	10.7988	0.548337	0.1248	0.139802	0.00356312	0.0256946	14.46	0.55441	1.13392	0.257563	0	0	0.151128	0.1134	0	0	0	0
Sol 789	661	69.7895	3.57333	0.397425	0.701111	0.499087	0.183512	6.41952	0.232326	7.79034	0.425125	0.277657	0.14428	0.00995411	0.0322019	5.95264	0.235739	1.29892	0.284061	0.017115	0.0324578	0.0496995	0.049327	0.253621	0.151149	0	0
Sol 789	662	60.8931	2.21863	0.340024	0.728662	0.849631	0.227429	10.6065	0.386761	8.52755	0.461563	0.675783	0.232596	0.0390039	0.0540054	6.16022	0.341511	1.03834	0.3296	0.00275484	0.0112744	0.124266	0.0995018	0	0	0	0
Sol 789	663	46.2896	1.68781	0	0	0.92662	0.241479	14.2046	0.509937	11.6479	0.584079	0.635991	0.160593	0.14575	0.115655	12.3118	0.477632	1.6264	0.328108	0.00684587	0.0192288	0.18065	0.125442	0	0	0	0
Sol 789	664	36.2315	1.8532	2.21303	1.18001	0.958629	0.247238	21.4255	1.0749	13.3018	0.9175	0.4045	0.2241	0	0	13.0951	0.7075	1.5859	0.4562	0	0	0.2285	0.2069	0	0	0	0
Sol 789	665	58.3491	2.11063	0	0	0.354787	0.180909	7.83373	0.279098	9.14263	0.471512	0.160673	0.118658	0.0291147	0.0431526	12.6095	0.48262	1.03967	0.240502	0	0	0.0571655	0.0535075	0	0	0.00199759	0.00838986
Sol 789	666	61.0647	2.18762	0.253362	0.722228	0.342897	0.188747	14.6361	0.519748	9.58992	0.49904	0.164472	0.169577	0.0312962	0.0484781	10.0262	0.386501	1.47672	0.308067	0	0	0.0509279	0.0503716	0	0	0	0
Sol 789	667	36.6822	1.88328	1.07159	0.826662	0.87203	0.232923	13.4713	0.479952	12.7673	0.623821	0.514663	0.152403	0.039127	0.0520027	12.2205	0.476643	2.16792	0.379955	0.070239	0.0625322	0.106825	0.0873553	0	0	0	0
Sol 789	668	38.3671	1.46834	0.118187	0.715594	0.773436	0.213766	14.1961	0.523082	12.1784	0.608549	0.293177	0.15194	0.00965939	0.0308765	5.92637	0.412744	2.2207	0.379124	0	0	0.12159	0.0977681	0	0	0	0
Sol 789	669	48.549	1.82526	0.244465	0.956797	0.426861	0.178544	11.0884	0.403153	12.0854	0.596346	0.177789	0.125085	0.0485805	0.0610658	4.90903	0.296608	1.46699	0.307193	0	0	0.113691	0.0927363	0	0	0	0
Sol 789	670	35.7919	1.84148	1.03415	1.03465	0.116737	0.132156	24.8369	0.882443	26.3063	1.5985	0.0488718	0.0630724	0	0	3.20544	0.504736	0.548824	0.14079	0	0	0.280413	0.211256	0	0	0	0
Sol 789	671	35.1566	1.80255	0	0	0.2123	0.164324	23.266	0.826303	23.3289	1.40845	0.0500804	0.0680554	0	0	2.94467	0.593118	0.469114	0.217469	0	0	0.275027	0.228896	0	0	0	0
Sol 789	672	47.6251	2.4569	0.290504	0.654954	0.334449	0.187957	13.279	0.677226	14.9223	0.977236	0.169318	0.123262	0	0	4.32403	0.310284	1.26825	0.278386	0	0	0.172446	0.124033	0	0	0	0
Sol 789	673	46.3965	1.67092	0.395253	0.829412	0.75833	0.21283	24.5299	1.2543	14.0912	0.678093	0.164588	0.120686	0.0321391	0.0448352	3.67575	0.373401	2.23588	0.383109	0.000951195	0.0093117	0.44326	0.149268	0	0	0.016173	0.0311944
Sol 789	674	46.1251	1.66838	0	0	0.806152	0.222192	30.0291	1.06533	17.1146	0.788109	0.185095	0.130321	0	0	2.37215	0.391705	2.47389	0.394659	0	0	0.54916	0.165321	0	0	0	0
Sol 789	675	55.5636	2.00131	0.53312	1.12324	0.839434	0.229175	23.7328	0.842008	16.5535	0.757418	0.127474	0.100432	0	0	2.0828	0.372862	3.0013	0.399738	0.0425459	0.0462774	0.397424	0.159164	0	0	0	0
Sol 789	676	57.8041	2.9303	0.472203	1.05736	0.777338	0.215357	16.2064	0.8136	12.372	0.8435	0.0468868	0.0481657	0	0	3.8461	0.5089	2.5637	0.5626	0.0957238	0.0805613	0.227425	0.145726	0	0	0	0
Sol 789	677	62.6093	2.23976	0.276104	0.627741	0.216695	0.163058	6.16171	0.219978	9.16706	0.465907	0.109253	0.0890146	0.0110044	0.0320173	6.1431	0.395411	1.37106	0.293483	0.0314131	0.0375437	0.0304772	0.0397855	0	0	0.0205843	0.03391
Sol 789	678	42.3427	1.52941	1.35387	0.838628	0.613547	0.183391	17.1297	0.610487	13.4613	0.644248	0.19245	0.133339	0	0	17.3399	0.662406	2.08473	0.372681	0.00783681	0.0211644	0.077567	0.0666326	0	0	0	0
Sol 789	679	29.8148	1.0873	0	0	0.760565	0.213481	29.3911	1.04361	14.5137	0.712037	0.329508	0.156767	0	0	17.8795	0.68138	2.73234	0.39863	0	0	0.297558	0.161348	0	0	0	0
Sol 789	680	36.4694	1.32209	0	0	0.713895	0.20339	30.2382	1.07228	13.4042	0.671388	0.286501	0.159625	0.036485	0.0499931	7.67492	0.297635	1.87396	0.491136	0	0	0.411164	0.207039	0	0	0	0
Sol 789	681	32.2462	1.17184	0.429839	0.867866	1.08158	0.270395	28.88	1.02478	12.7748	0.651522	1.27101	0.394398	0	0	6.7683	0.263709	1.91638	0.501388	0	0	0.358186	0.225502	0	0	0	0
Sol 789	682	50.5329	1.824	0	0	0.779621	0.212748	14.9328	0.53197	7.53689	0.427925	1.52157	0.45029	0.158782	0.12157	7.35688	0.286369	2.0584	0.370236	0	0	0.152042	0.113779	0.0049257	0.0140383	0	0
Sol 789	683	34.684	1.258	0.527372	0.959392	0.176599	0.160548	37.1332	1.31975	12.0455	0.627718	0.311764	0.163027	0.0970656	0.086963	8.11556	0.314152	3.86769	0.354851	0	0	0.393025	0.158519	0	0	0	0
Sol 789	684	40.6248	1.46955	0.431949	0.885732	0.649229	0.198002	27.1245	0.965895	13.7482	0.674835	0.207014	0.138091	0	0	8.1221	0.456858	3.34772	0.394972	0	0	0.355129	0.161751	0	0	0	0
Sol 789	685	41.7953	1.50961	0	0	0.653372	0.195366	31.1724	1.10521	15.4387	0.733746	0.334837	0.163714	0.0402369	0.0531704	5.15302	0.212998	2.93244	0.40248	0	0	0.401407	0.15663	0	0	0	0
Sol 789	686	30.5596	1.11378	0.392382	0.914084	0.304001	0.264142	35.5418	1.26042	20.2674	0.915572	0.574387	0.145424	0	0	5.6857	0.224285	1.30647	0.396479	0	0	0.513283	0.13509	0	0	0	0
Sol 789	687	14.6926	0.565359	1.759	0.985737	0.873478	0.238667	41.2716	1.47439	22.747	1.02833	0.638069	0.15994	0.0927566	0.0931906	4.44847	0.294882	1.13515	0.257784	0	0	0.683692	0.170352	0	0	0	0
Sol 789	688	12.9469	0.536178	1.55747	1.49109	0.942988	0.256899	44.6295	2.26312	20.4947	1.00859	0.600004	0.211285	0.179176	0.132156	3.83448	0.422265	1.8171	0.354364	0	0	0.7125	0.214737	0	0	0	0
Sol 789	689	16.6227	0.648845	0.648525	0.977634	0.4434	0.259919	41.9392	2.13783	21.3222	0.9993	0.5065	0.184261	0.0371908	0.050888	3.74376	0.319597	1.60855	0.423858	0	0	0.4407	0.21194	0	0	0	0
Sol 789	690	27.299	1.41484	0.916329	1.72099	0.612809	0.204544	34.8469	1.23655	16.9922	0.809114	0.581218	0.205976	0	0	4.61533	0.275263	2.11765	0.503993	0	0	0.447996	0.147191	0	0	0	0
Sol 789	691	36.9091	1.37208	1.58858	1.07161	0.722557	0.217165	33.5485	1.21837	15.3049	0.750962	0.317242	0.164802	0	0	5.30225	0.26917	3.47868	0.45327	0	0	0.50831	0.15821	0	0	0	0
Sol 789	692	34.0054	1.24467	0.463799	1.0187	0.51738	0.193445	40.8322	1.45002	14.5239	0.722044	0.302246	0.160171	0.0438197	0.0574696	6.02321	0.236547	4.34676	0.299531	0	0	0.434172	0.151939	0	0	0	0
Sol 789	693	66.653	2.38467	0	0	0.461741	0.169475	12.2425	0.727821	7.99314	0.437234	0.5375	0.19455	0.0492781	0.0619102	6.89659	0.269025	1.9419	0.513814	0	0	0.1444	0.155168	0	0	0	0
Sol 789	694	62.4177	2.23609	0.187658	0.756955	0.574412	0.205488	21.1156	1.24683	9.8286	0.517924	0.8963	0.301097	0	0	5.58301	0.219836	0.889236	0.213223	0	0	0.2886	0.226678	0	0	0	0
Sol 789	695	52.7305	1.90318	0	0	0.685876	0.197358	17.6326	0.890382	12.3482	0.60673	0.373794	0.201655	0	0	6.86469	0.379111	1.19701	0.26776	0	0	0.191934	0.180321	0	0	0	0
Sol 789	696	44.2446	1.63329	0.419464	0.824062	0.814765	0.223386	18.7176	0.666581	13.2336	0.645741	0.487475	0.136268	0.0474814	0.0605236	10.3488	0.397776	2.48454	0.395884	0.00170169	0.0103102	0.264367	0.154756	0	0	0	0
Sol 789	697	65.4282	2.35719	0.375402	0.706169	0.544853	0.166461	10.0888	0.510486	8.32812	0.447822	0.140252	0.149135	0.0110202	0.0372144	7.05182	0.389333	1.52788	0.433055	0.0404746	0.0456612	0.070311	0.0855768	0	0	0.0195993	0.0327826
Sol 789	698	78.217	2.83854	0.355795	0.605776	0.260166	0.174566	4.37959	0.288337	4.60179	0.372159	0.26163	0.155486	0	0	4.10013	0.334943	0.666104	0.167562	0	0	0.0253472	0.0373183	0	0	0.0182362	0.0316359
Sol 789	699	66.6331	2.38487	0.408347	0.674595	0.398632	0.161393	9.38875	0.33407	10.5566	0.520209	0.30015	0.161928	0.030122	0.0435497	4.2688	0.313131	1.90431	0.35713	0.0386967	0.0439067	0.117691	0.0939074	0	0	0.0336996	0.0413809
Sol 789	700	62.759	2.25171	1.02606	0.772198	0.906903	0.237948	13.1258	0.673519	13.5911	0.63656	0.163557	0.120304	0	0	2.79647	0.403275	2.48194	0.537763	0.0625815	0.0565573	0.161221	0.118716	0	0	0	0
Sol 789	701	52.9765	1.90399	0.47556	0.804741	0.614861	0.183663	22.6428	0.803021	13.5215	0.649056	0.214339	0.141042	0.00569173	0.0263118	3.32164	0.394334	2.06009	0.370452	0	0	0.302174	0.161834	0	0	0	0
Sol 789	702	25.4053	1.31699	1.43722	0.969429	0.68045	0.198241	38.1086	1.35068	15.7003	0.760425	0.31457	0.163008	0.0429648	0.0555397	3.23171	0.397461	2.31105	0.543894	0	0	0.556972	0.141165	0	0	0	0
Sol 789	703	36.4871	1.98016	0	0	0.52735	0.177978	26.0356	0.92406	14.161	0.684306	0.436394	0.148239	0	0	3.17963	0.511155	1.48183	0.42458	0	0	0.356684	0.163242	0	0	0	0
Sol 789	704	49.7614	1.80384	1.36036	0.781196	0.532823	0.168184	11.117	0.398988	12.3414	0.591774	0.204113	0.13669	0.0496412	0.062153	5.4349	0.252233	1.4719	0.307557	0.00134241	0.00894938	0.119709	0.136952	0	0	0	0
Sol 789	705	46.466	1.6806	0	0	0.66919	0.192747	11.6101	0.414349	16.8104	0.750848	0.142633	0.10909	0.0374038	0.0519287	5.20898	0.243929	1.81275	0.34792	0.04572	0.047447	0.106462	0.1241	0	0	0	0
Sol 789	706	52.0504	1.86828	0	0	0.705262	0.200414	9.00778	0.320739	13.0129	0.613541	0.22217	0.203783	0.00429914	0.0249645	6.25953	0.245305	2.14392	0.376922	0.05405	0.0498026	0.0808163	0.0973183	0	0	0.0002491	0.0069748
Sol 789	707	48.5228	1.75319	0.742501	0.772948	0.803232	0.219065	14.5837	0.523563	13.1455	0.634113	0.25888	0.15169	0	0	7.52565	0.302497	2.42897	0.394331	0.0485435	0.0512799	0.129994	0.101776	0	0	0	0
Sol 789	708	36.9342	1.35631	0.375153	0.846077	1.25402	0.296245	18.6923	0.668956	13.1758	0.661698	0.170727	0.184064	0.0596308	0.0705204	6.45107	0.361631	2.72149	0.396103	0.0292501	0.0364874	0.146703	0.111075	0	0	0	0
Sol 789	709	41.8728	1.52655	0	0	1.10413	0.273082	15.8177	0.567551	11.1978	0.830955	0.339335	0.261406	0	0	8.7521	0.483315	2.48518	0.393056	0.0665438	0.0603166	0.121468	0.097017	0	0	0	0
Sol 789	710	46.8211	1.74027	0.93342	0.895137	0.536818	0.176201	16.5561	0.614475	12.8934	0.645364	0.347713	0.156269	0.0327104	0.0473008	10.4531	0.411978	2.44991	0.394838	0.0646209	0.0587266	0.0997838	0.0836027	0	0	0	0
Sol 789	711	31.7152	1.1531	0.114875	0.881602	1.14804	0.282138	24.7676	0.878535	13.5388	0.669114	0.428936	0.14963	0.0417146	0.0555767	10.2545	0.395165	2.47075	0.39516	0	0	0.242015	0.150402	0	0	0	0
Sol 789	712	45.0887	2.57026	0	0	0.964245	0.251605	20.1138	1.13326	10.2677	0.540284	0.4099	0.223047	0.0489413	0.0624461	7.7506	0.469469	2.2169	0.542979	0	0	0.2091	0.197573	0	0	0.021016	0.0330897
Sol 789	713	60.2457	2.16598	0	0	1.0139	0.255601	8.07156	0.28809	8.21764	0.441069	0.67333	0.169025	0.0280181	0.0413162	4.7861	0.294434	1.45189	0.3051	0.0145783	0.0302087	0.0871971	0.073567	0	0	0	0
Sol 789	714	70.8244	3.61426	0	0	0.653169	0.200168	7.09835	0.266067	8.23587	0.453479	0.627818	0.190224	0	0	6.36272	0.314332	1.21848	0.361941	0	0	0.0554894	0.0702373	1.33761	0.291183	0.0534439	0.0606857
Sol 789	715	59.6015	2.1501	0	0	0.355986	0.18694	15.7897	0.561564	9.47183	0.692597	0.145649	0.1111	0.0535251	0.0661284	9.42488	0.363899	1.42732	0.301672	0	0	0.106801	0.1217	1.47149	0.303603	0	0
Sol 789	716	45.7146	2.3275	0.80076	1.1152	0.440157	0.178616	21.0244	1.0547	14.7392	0.6995	0.202625	0.134665	0	0	14.3708	0.7753	1.1509	0.3681	0	0	0.2653	0.2206	0.0274	0.0569	0	0
Sol 789	717	42.3716	1.53063	0.449281	1.12769	0.476852	0.185395	23.5567	0.836249	16.5659	0.764598	0.440191	0.147804	0	0	13.4139	0.512426	0.969836	0.228384	0	0	0.371313	0.162141	0.16536	0.120786	0	0
Sol 789	718	37.2821	1.35442	0.278565	0.79044	0.638372	0.190584	22.4748	1.17616	18.9667	0.854385	0.782892	0.190476	0	0	10.043	0.565412	1.69152	0.334994	0	0	0.449144	0.177795	0	0	0	0
Sol 789	719	48.8127	2.4826	0	0	0.778928	0.214734	22.2731	1.1172	15.0263	0.707114	0.5349	0.1931	0	0	4.6191	0.3717	2.45062	0.395221	0	0	0.3865	0.2275	0	0	0	0
Sol 789	720	51.13	1.88069	0.502128	0.833566	0.801961	0.224177	24.728	0.892625	11.74	0.879255	0.566325	0.167759	0.0452136	0.0572915	3.47991	0.35955	2.46614	0.379373	0	0	0.564789	0.163031	0	0	0	0
Sol 789	721	42.9962	1.81191	0	0	1.09545	0.320946	23.0119	0.956388	14.3734	0.992521	0.557615	0.185677	0.0938616	0.0991158	5.22761	0.385854	2.8128	0.343051	0	0	0.404437	0.139712	0	0	0.00597965	0.0181059
Sol 789	722	37.522	1.50503	0.179768	0.859035	1.38651	0.326804	14.8175	0.593847	15.5199	0.887452	2.08908	0.35277	0.0629658	0.075607	6.39391	0.420719	3.02208	0.395271	0	0	0.20444	0.140004	0	0	0.0700063	0.0732246
Sol 789	723	33.6757	1.92895	1.82501	1.26545	1.42377	0.322401	27.019	0.95797	16.5795	0.770428	0.5622	0.202309	0.119241	0.10015	3.6907	0.535446	2.8389	0.573096	0	0	0.39876	0.158747	0	0	0.0569	0.0729051
Sol 789	724	24.7574	0.98148	0.631321	0.928746	0.901985	0.248951	34.592	1.28079	16.3594	0.836238	0.406423	0.19872	0.123463	0.110971	5.77159	0.306806	2.75892	0.395285	0	0	0.358004	0.146618	0	0	0	0
Sol 789	725	29.1766	1.51187	0.765606	1.34717	0.99812	0.270553	32.2176	1.22529	15.8359	0.808269	0.352211	0.149366	0	0	6.1418	0.341004	2.55991	0.394589	0	0	0.352208	0.1467	0.0180842	0.0338341	0	0
Sol 789	726	23.4202	0.860067	1.96684	1.24374	0.505761	0.164516	26.339	1.44623	20.1331	0.906386	0.2187	0.202859	0	0	3.5021	0.550609	1.16812	0.2616	0	0	0.361881	0.160154	0	0	0	0
Sol 789	727	28.3269	1.05136	0	0	0.43773	0.179816	26.7201	0.952982	23.2346	1.01669	0.280498	0.157506	0	0	5.5545	0.218901	0.615307	0.155843	0	0	0.363682	0.164016	0	0	0	0
Sol 789	728	24.4071	1.26729	0.758542	0.828574	0.954076	0.24763	25.1532	0.892624	17.5741	0.808947	0.482649	0.139397	0	0	9.04995	0.348689	1.55645	0.317814	0	0	0.283196	0.231745	0	0	0	0
Sol 789	729	21.9592	0.81064	0	0	1.12211	0.278915	34.2111	1.21684	16.7895	0.800992	0.476923	0.148627	0.0588789	0.0639747	5.97455	0.23577	2.26803	0.385973	0	0	0.4292	0.216133	0	0	0	0
Sol 789	730	36.6034	1.3359	1.30409	0.976093	0.976496	0.255086	28.5688	1.4425	16.1731	0.768855	0.311476	0.164068	0	0	4.29456	0.316654	2.88217	0.52337	0	0	0.39152	0.161841	0	0	0	0
Sol 789	731	33.0114	1.21604	0.387961	1.60438	1.70293	0.357437	25.6311	0.9125	16.7366	0.78457	0.359592	0.263721	0	0	3.95004	0.625975	3.35184	0.469013	0	0	0.238866	0.149906	0.113288	0.129958	0	0
Sol 789	732	29.6754	1.11784	0	0	1.76485	0.371132	31.9679	1.17419	16.4353	0.804327	0.490062	0.159425	0	0	8.2396	0.454661	3.5549	0.537905	0	0	0.451706	0.154188	0	0	0	0
Sol 789	733	24.7899	0.950044	1.18748	0.938401	1.27154	0.300964	20.8684	0.746427	13.5849	0.680427	0.502783	0.156945	0.0433309	0.0557222	6.91492	0.390106	2.54221	0.395836	0	0	0.387559	0.148266	0	0	0.03096	0.0391272
Sol 789	734	25.909	1.03928	0	0	1.11991	0.283219	24.8297	0.923816	12.4505	0.749174	0.309142	0.301247	0.0563939	0.0686992	5.38894	0.875785	2.97656	0.79446	0	0	0.466095	0.16057	0	0	0	0
Sol 789	735	25.6436	1.004	1.18752	1.14613	1.24501	0.304115	41.3675	1.50392	14.4588	0.762785	0.44436	0.157629	0.0222871	0.0414361	4.86211	0.341898	3.46086	0.3794	0	0	0.57962	0.16337	0	0	0	0
Sol 789	736	18.317	0.695623	2.51312	1.5068	1.13064	0.279961	41.2904	1.47286	15.3392	0.765598	0.429578	0.149653	0	0	4.45558	0.287149	3.42351	0.378976	0	0	0.569296	0.144201	0	0	0	0
Sol 789	737	25.4039	1.33122	1.54729	1.32828	1.62273	0.350083	32.273	1.15032	17.404	0.822467	0.464654	0.143023	0.0177	0.0377503	6.81208	0.266956	3.00287	0.537986	0.069332	0.0618378	0.454268	0.146351	0	0	0	0
Sol 789	738	41.7015	1.50532	1.00992	1.22335	3.30133	0.420131	20.169	0.715594	16.5833	0.764841	0.290033	0.160408	0	0	5.39183	0.212665	2.99214	0.401688	0	0	0.394356	0.158364	0	0	0.104771	0.0861657
Sol 789	739	48.3931	1.74862	0.515397	0.768928	4.15903	0.359772	16.0252	0.571556	16.6051	0.756984	0.106155	0.0884614	0	0	3.71442	0.370069	3.14827	0.397726	0	0	0.205697	0.137803	0.0635352	0.0562461	0.175764	0.12574
Sol 789	740	45.3272	1.65259	0.331977	0.774743	3.88231	0.373586	16.3041	0.582805	17.3376	0.789141	0.0990121	0.0835707	0.0458268	0.0589079	3.22324	0.39941	3.38514	0.387187	0	0	0.312824	0.161947	0.030035	0.040505	0.184845	0.130227
Sol 789	741	47.0442	1.73361	0.534301	0.878647	2.76622	0.404583	19.0744	0.685941	18.8221	0.852013	0.0908472	0.07714	0.121927	0.103784	3.82906	0.364868	3.2583	0.389131	0.0189389	0.0336356	0.333923	0.16278	0	0	0.0777426	0.0772082
Sol 789	742	47.0749	1.72189	0.173804	0.82015	2.23975	0.397954	18.2728	0.651787	17.9	0.822906	0.131203	0.103023	0.117241	0.0996242	3.29004	0.397684	3.27687	0.387219	0.0187819	0.0334349	0.469737	0.141196	0	0	0.069589	0.0712604
Sol 789	743	43.9662	2.24568	0.530493	1.11237	2.837	0.419635	16.0436	0.570324	15.484	1.02409	0.0809893	0.0703179	0.0661821	0.0747355	3.00177	0.402726	3.43766	0.381216	0	0	0.849693	0.20245	0.00399923	0.0120977	0.130079	0.102086
Sol 789	744	45.8334	1.65663	0	0	2.6064	0.415513	17.1933	0.610639	17.9671	0.804261	0.0930563	0.0793768	0.177469	0.126681	3.71445	0.3713	3.28223	0.394215	0	0	0.735319	0.179398	0	0	0.206646	0.138543
Sol 789	745	47.1067	1.69765	0.414632	0.779401	2.63789	0.418278	17.9568	0.637608	18.4135	0.820107	0.120348	0.0961764	0.187541	0.134581	3.06375	0.401752	3.46957	0.384136	0	0	0.809892	0.19457	0.0111007	0.0256165	0.12799	0.100753
Sol 789	746	46.1376	1.67207	0.102928	0.800167	2.78198	0.41123	17.8179	0.63484	16.9365	0.778344	0.111956	0.0912346	0.102202	0.0999178	3.34999	0.393425	3.53801	0.379374	0	0	0.810754	0.194862	0.113567	0.091453	0.0369064	0.0445058
Sol 789	747	47.076	1.70848	0.138245	0.808738	2.23268	0.404957	18.5166	0.659815	17.1626	0.786414	0.125944	0.0997702	0.0707508	0.0797912	3.2702	0.39702	3.34447	0.389653	0	0	0.745234	0.181659	0.123364	0.0979208	0.0614111	0.0622229
Sol 789	748	47.7741	1.73449	1.15176	0.851264	2.96777	0.401369	18.6623	0.667509	17.0673	0.775978	0.0853952	0.0730027	0.0865764	0.0818978	2.98932	0.404058	3.38275	0.388196	0.00346108	0.0131922	0.544306	0.139852	0.00803479	0.0203883	0.1797	0.126665
Sol 789	749	46.2533	1.67	3.59659	1.25748	5.70307	0.28146	19.048	0.676146	18.125	0.820678	0.0618605	0.0562328	0	0	2.33675	0.389464	3.25638	0.395235	0	0	0.30576	0.162207	0	0	0.224006	0.144228
Sol 789	750	45.5873	1.64401	0.120627	0.744334	6.31739	0.299275	17.9075	0.635854	18.3775	0.81851	0.0959539	0.080603	0.00689779	0.0264415	2.75935	0.403331	3.05894	0.401082	0	0	0.0926483	0.0777248	0.393037	0.159557	0.330532	0.163642
Sol 789	751	44.4459	1.62171	0.0170684	0.832085	4.77134	0.295739	19.9524	0.713747	17.0032	0.779003	0.225647	0.141511	0.0165221	0.0377367	3.65455	0.375195	3.0647	0.401108	0	0	0.180734	0.127861	0	0	0.3307	0.164083
Sol 789	752	29.8152	1.12514	0	0	2.44766	0.415961	24.5484	0.887442	15.814	0.762975	0.394321	0.157694	0.0353754	0.0486858	7.4089	0.294135	2.88011	0.401869	0.0204784	0.03543	0.381566	0.159209	0	0	0.0329914	0.0415431
Sol 789	753	13.8743	0.745499	1.92422	1.08567	0.913252	0.243057	44.7488	1.58595	16.6216	0.817645	0.406404	0.238835	0	0	4.71079	0.24889	2.75302	0.593699	0.00233268	0.0120605	0.602226	0.151107	0	0	0	0
Sol 789	754	24.5782	0.941485	1.16976	1.43788	1.0142	0.264866	39.7143	1.42239	14.3349	0.743714	0.480737	0.162578	0	0	5.04308	0.329219	3.13868	0.395614	0	0	0.693818	0.172954	0	0	0	0
Sol 789	755	41.7199	1.7506	0.36687	1.00862	0.864802	0.283633	26.2447	1.32044	10.8455	0.680504	0.467458	0.166547	0.0594242	0.0749242	7.14451	0.456153	2.67247	0.495195	0.0813827	0.0887597	0.41	0.222107	0	0	0	0
Sol 789	756	39.4733	1.44174	0.271447	0.832238	0.845688	0.229873	23.1532	0.828314	9.92558	0.537836	0.417022	0.154622	0.0721237	0.0817278	7.50036	0.299864	2.55467	0.399693	0	0	0.321261	0.157582	0	0	0	0
Sol 789	757	26.2273	1.37472	1.21049	1.06475	0.982209	0.257569	38.319	1.94627	14.3093	1.02217	0.5065	0.184148	0.074953	0.0834528	6.29019	0.250549	3.27608	0.50559	0	0	0.6218	0.21976	0	0	0	0
Sol 789	758	22.2949	0.82411	1.96935	1.04435	1.17448	0.288169	38.7401	1.38069	16.941	0.816421	0.549429	0.196507	0.0678832	0.0774933	3.87129	0.572093	3.50957	0.376022	0	0	0.462204	0.229809	0	0	0	0
Sol 789	759	27.3293	1.00865	0	0	1.65627	0.355159	32.8753	1.18033	21.0955	0.960542	0.4508	0.208228	0	0	2.98522	0.40401	3.01159	0.527453	0	0	0.394268	0.14619	0	0	0.102	0.119301
Sol 789	760	29.2775	1.08217	0.0512932	0.903277	1.3511	0.316326	31.4351	1.13423	19.9671	0.927425	0.452548	0.156182	0.0676188	0.0779997	5.13675	0.295974	2.42534	0.511985	0	0	0.360957	0.15295	0	0	0.00788434	0.021008
Sol 789	761	24.1986	1.26416	0.904643	0.953063	1.04539	0.267083	32.0703	1.62098	17.2655	1.14558	0.816174	0.229424	0.0317867	0.0458681	7.82137	0.328756	2.1816	0.488143	0	0	0.349089	0.158524	0	0	0	0
Sol 789	762	25.7397	0.975394	3.01832	1.24233	1.11109	0.27469	23.0306	0.822135	15.5766	0.745914	0.345323	0.199902	0	0	7.21648	0.401802	1.88158	0.355402	0.0146229	0.0304058	0.249967	0.198566	0	0	0	0
Sol 789	763	24.7225	0.95823	0.972705	0.864348	0.961127	0.249473	19.1506	0.690541	15.2872	0.73396	0.264975	0.195913	0	0	7.52547	0.419917	1.92131	0.359166	0.0232936	0.0339797	0.250329	0.153366	0.000356608	0.00560384	0	0
Sol 789	764	26.7095	1.08062	0.92512	0.996914	1.01492	0.28476	25.866	1.33572	14.7506	0.7737	0.602112	0.189746	0	0	7.28703	0.407543	2.57654	0.465586	0	0	0.273793	0.153196	0	0	0	0
Sol 789	765	22.5344	0.84156	2.10014	1.36054	1.23403	0.295923	35.2435	1.25788	15.3188	0.754658	0.32132	0.245554	0.0441897	0.0579301	7.25737	0.284569	2.57069	0.391552	0	0	0.41313	0.149039	0	0	0	0
Sol 789	766	33.7518	1.7322	0	0	0.895683	0.237737	35.7051	1.7894	12.9849	0.9338	0.3591	0.2317	0.1252	0.1465	6.2014	0.343	2.30418	0.389766	0	0	0.429228	0.150985	0	0	0	0
Sol 789	767	44.6654	1.61298	0	0	0.695081	0.198638	16.6403	0.59083	12.8334	0.624915	0.370317	0.236915	0.0157632	0.0375314	7.67867	0.297935	2.38928	0.545177	0	0	0.209761	0.139801	0	0	0	0
Sol 789	768	42.0666	1.53738	0	0	0.792013	0.222351	24.7646	1.25388	15.6795	0.740953	0.600366	0.178842	0.013704	0.0350885	7.39044	0.288656	1.96185	0.487801	0	0	0.363674	0.159817	0.0452919	0.0642536	0	0
Sol 789	769	51.5249	1.85261	0	0	0.562032	0.198684	15.3634	0.545492	13.8107	0.6502	0.460539	0.143954	0	0	6.57218	0.256694	1.58193	0.321999	0	0	0.28946	0.159344	0	0	0	0
Sol 789	770	46.7357	1.68311	0	0	0.71905	0.206451	23.1946	0.824284	15.2765	0.717257	0.906148	0.303799	0	0	4.10304	0.333429	1.94621	0.361139	0	0	0.521355	0.132863	0	0	0	0
Sol 789	771	43.5414	1.57229	0	0	0.695899	0.200272	21.2281	1.07306	16.7497	0.769208	0.637714	0.224105	0	0	6.68168	0.260763	1.76042	0.494971	0	0	0.412585	0.156847	0	0	0.00498616	0.0154073
Sol 789	772	33.6558	1.22178	0.897013	1.71102	0.661768	0.195841	30.1672	1.07025	19.3651	0.880679	0.479709	0.141977	0	0	10.6469	0.408953	1.54693	0.447663	0	0	0.525252	0.143251	0.4443	0.14736	0	0
Sol 789	773	25.36	1.31716	0	0	0.758447	0.220102	33.5542	1.18981	21.3444	0.953775	0.229874	0.211945	0	0	10.5861	0.406858	1.48185	0.442453	0	0	0.364783	0.152875	0.308539	0.231253	0	0
Sol 789	774	27.5122	1.4444	1.57222	1.29293	0.566164	0.210116	28.1529	1.01812	14.6862	0.727853	0.18965	0.129464	0	0	8.7124	0.34479	2.07719	0.355133	0	0	0.264344	0.156234	0.0142869	0.0292831	0	0
Sol 789	775	55.6918	2.29345	0.762402	0.774208	0.394776	0.167667	14.9426	0.697359	10.1092	0.710841	0.236762	0.0986229	0.0211032	0.0458936	9.631	0.473482	1.33385	0.300768	0	0	0.14281	0.119666	0.48096	0.179692	0	0
Sol 789	776	56.3106	2.5633	0.0536147	0.617253	0.451772	0.184101	5.59127	0.363516	5.97346	0.675137	0.229219	0.131572	0.0253588	0.0400859	5.43451	0.400469	1.24528	0.294875	0.0229725	0.0376804	0.0566217	0.0656315	0.00141687	0.00680113	0	0
Sol 789	777	56.0679	2.17466	0.220318	0.753517	0.502027	0.187171	6.60494	0.311915	7.58621	0.465849	0.26229	0.146681	0.0614515	0.0738758	7.78343	0.375701	1.56741	0.322895	0.0338684	0.0427956	0.0529307	0.0553967	0	0	0.00817238	0.021301
Sol 789	778	30.7048	1.13416	1.24244	0.949301	1.09525	0.273281	25.3697	0.903681	12.461	0.639362	0.405749	0.156036	0.0873961	0.0843355	9.44575	0.367596	2.69567	0.39886	0	0	0.223458	0.144676	0.864304	0.291373	0.109344	0.12771
Sol 789	779	42.5762	1.59259	0	0	1.20975	0.292187	17.899	0.64964	12.8988	0.646258	0.293732	0.151397	0	0	7.08409	0.290156	2.56752	0.482492	0	0	0.130252	0.10383	0.0838609	0.100322	0	0
Sol 789	780	55.0102	2.07935	0	0	0.650383	0.225221	11.4525	0.436381	11.0586	0.58991	0.369373	0.146659	0	0	5.85085	0.352119	2.08187	0.379508	0	0	0.146159	0.112305	0	0	0	0
Sol 789	781	46.8167	1.73512	0.54072	1.02233	0.839685	0.225027	11.9384	0.452936	11.7318	0.591224	0.0901676	0.110658	0	0	4.45037	0.623336	2.3936	0.391018	0.0582048	0.0541719	0.0991825	0.0848478	0	0	0.00201156	0.00880058
Sol 789	782	45.2753	1.6297	2.59368	1.20768	1.18986	0.28666	13.3771	0.478198	12.6674	0.614101	0.310761	0.162666	0.0509141	0.0627446	6.99668	0.395652	2.71605	0.401364	0.0834524	0.0728233	0.100251	0.0826701	0	0	0.00244674	0.00968708
Sol 789	783	49.0722	2.4948	0.85013	0.817146	1.00331	0.255931	18.4378	0.9253	13.2078	0.639089	0.362505	0.163883	0.0184538	0.0384006	7.33597	0.285941	2.4516	0.5571	0.0199313	0.0345883	0.1968	0.1907	0	0	0	0
Sol 789	784	57.3828	2.0792	0.0239069	0.677715	0.601005	0.179274	10.9068	0.391901	12.3445	0.593231	0.120647	0.0966325	0.00963614	0.0304564	3.56662	0.468731	2.72771	0.400426	0.0796552	0.0691715	0.0785888	0.0692308	0	0	0.0120473	0.0269174
Sol 789	785	53.8232	1.95894	0.252412	0.689331	0.729789	0.20385	12.7496	0.457323	10.3895	0.527569	0.146083	0.110656	0.0471105	0.0551372	4.55451	0.274787	2.45613	0.393295	0.0158686	0.0311359	0.135825	0.105059	0	0	0	0
Sol 789	786	27.7596	1.02429	0	0	1.03325	0.263029	33.7746	1.19836	14.7472	0.733426	0.313779	0.16099	0.109129	0.102819	4.94967	0.218702	2.7037	0.592005	0	0	0.378898	0.160451	0	0	0	0
Sol 789	787	20.7308	0.792682	0	0	1.01284	0.264588	33.739	1.72645	17.1726	0.843294	0.277773	0.206294	0.106398	0.103308	3.60809	0.39375	2.80059	0.667117	0	0	0.328716	0.205945	0.0162366	0.0307816	0	0
Sol 789	788	49.2256	2.6635	0.613327	1.14875	0.759238	0.213482	23.5745	1.25998	13.5831	0.675171	0.2492	0.215849	0.054963	0.0683389	4.8934	0.319764	2.6696	0.568347	0	0	0.2654	0.220655	0	0	0	0
Sol 789	789	70.9906	3.5879	0	0	0.365197	0.189498	9.38813	0.34265	9.4499	0.6798	0.245282	0.146135	0.0278892	0.0403615	5.9892	0.3322	1.6447	0.466	0.0230268	0.0357566	0.0982	0.1148	0	0	0	0
Sol 789	790	74.0269	2.67162	0.100021	0.599723	0.0952754	0.11172	4.32552	0.305356	6.71095	0.376188	0.213529	0.141693	0.0419686	0.0556883	7.25561	0.286234	0.726261	0.250505	0	0	0.0235106	0.0360329	0	0	0.00662575	0.017753
Sol 789	791	80.7339	2.8854	0	0	0.191011	0.152928	3.95413	0.337101	4.54085	0.36029	0.268455	0.156809	0.0483943	0.0608178	5.09085	0.215027	0.4974	0.134999	0	0	0.0188833	0.0316337	0	0	0.0171359	0.0313415
Sol 789	792	83.0722	2.96667	0	0	0.286406	0.180742	9.17584	0.3266	4.77147	0.362714	0.0489894	0.0634041	0	0	3.7539	0.367957	0.867912	0.208485	0	0	0.0897925	0.0753299	0	0	0.00314957	0.0106485
Sol 789	793	50.0926	1.81783	0	0	0.855098	0.23225	28.7371	1.44973	11.3374	0.595093	0.429387	0.192963	0.0109466	0.0343464	5.44667	0.304272	2.24937	0.385841	0	0	0.409886	0.153472	0	0	0	0
Sol 789	794	47.3045	1.70121	1.63381	1.21882	0.628697	0.18632	17.86	0.927203	11.0955	0.567225	1.7339	0.479051	0.0533043	0.0653707	9.71588	0.374097	2.08058	0.372687	0	0	0.262427	0.150991	0	0	0	0
Sol 789	795	71.8152	2.58949	0	0	0.275589	0.169181	20.1244	0.724156	9.18928	0.492453	0.458593	0.150703	0	0	5.1111	0.220225	0.837901	0.203508	0	0	0.362366	0.16414	0	0	0	0
Sol 789	796	67.3385	2.41461	0.471136	0.817238	0.482886	0.188024	23.0471	0.823135	8.9536	0.487241	0.574368	0.206386	0	0	3.9977	0.339761	2.02122	0.367954	0	0	0.370484	0.161046	0	0	0	0
Sol 789	797	29.5209	1.07881	3.14636	1.58254	0.44539	0.187108	46.9359	1.66273	12.8348	0.675675	0.373013	0.240325	0	0	3.96125	0.348288	4.95346	0.202065	0	0	0.481939	0.140089	0	0	0	0
Sol 789	798	22.9902	0.862718	0	0	0.409432	0.190928	47.7916	1.71525	15.7243	0.787051	0.371342	0.163841	0.00533792	0.0276464	4.28001	0.313894	4.57663	0.289064	0	0	0.66814	0.166509	0	0	0	0
Sol 789	799	18.4424	0.977654	1.1032	1.98615	0.907546	0.246843	48.9177	2.48083	14.8699	1.05934	0.3058	0.230135	0.0367291	0.0514027	5.01134	0.231993	3.802	0.619213	0	0	0.6136	0.217653	0.0270131	0.0347124	0	0
Sol 789	800	8.91117	0.349662	1.71638	1.96084	0.961302	0.249326	36.3349	1.90766	15.9153	1.12801	0.189589	0.1857	0	0	3.29154	0.385482	2.66736	0.556244	0	0	0.291623	0.223582	0	0	0	0
Sol 789	801	8.35743	0.332649	0	0	0.79122	0.219981	40.8882	2.07093	16.4498	0.809117	0.432845	0.152377	0.0577526	0.0689322	3.97218	0.347141	2.73083	0.402045	0	0	0.494614	0.131404	0	0	0	0
Sol 789	802	10.0094	0.389067	2.38718	1.53522	0.962426	0.250122	45.474	1.6114	13.1929	0.69709	0.377417	0.223754	0.126275	0.104293	2.92687	0.40339	3.39471	0.388087	0	0	0.583998	0.147495	0	0	0	0
Sol 789	803	20.7194	1.0883	0	0	0.737192	0.207929	37.6858	1.34521	12.4088	0.653058	0.461488	0.151494	0.0315184	0.0452263	3.30676	0.38695	3.59763	0.623397	0	0	0.5167	0.155276	0	0	0	0
Sol 789	804	20.3327	0.775849	0	0	0.616667	0.223717	42.5682	1.53555	14.8552	0.769095	0.460299	0.159744	0.0304864	0.0439231	4.28754	0.323308	3.84714	0.672673	0	0	0.452919	0.147587	0	0	0.0643716	0.0718407
Sol 789	805	17.0058	0.638319	2.41651	2.09472	0.686071	0.206729	53.3119	1.89174	13.564	0.724185	0.410208	0.158342	0.0493981	0.0621247	4.87655	0.242863	4.8217	0.316837	0	0	0.73995	0.180779	0	0	0	0
Sol 789	806	21.7493	0.808589	0.392799	1.17003	0.19366	0.166355	50.3899	1.7907	12.8696	0.687699	0.348424	0.16451	0.0281738	0.041987	4.76991	0.254918	5.07129	0.209883	0	0	0.640995	0.159696	0	0	0	0
Sol 789	807	69.5396	2.50146	0	0	0.373952	0.18894	22.8095	0.814786	8.45996	0.47125	0.168041	0.122639	0.00618614	0.0281143	3.06933	0.401598	2.32759	0.390398	0	0	0.264482	0.154613	0	0	0	0
Sol 789	808	78.8864	2.82052	0.0134108	0.621746	0.379527	0.174019	10.3263	0.368499	7.4774	0.41314	0.120494	0.0961245	0	0	3.2959	0.387209	1.14878	0.259107	0.0111598	0.0260063	0.127929	0.100275	0	0	0	0
Sol 789	809	59.628	2.13783	0.199716	0.72818	0.744029	0.207963	16.1983	0.575032	10.9494	0.549141	0.389696	0.221375	0.0558045	0.0607144	4.18136	0.435569	1.95652	0.506842	0.0121506	0.0275879	0.17937	0.127336	0	0	0	0
Sol 789	810	61.8705	3.135	0.0222003	0.759281	0.68137	0.19653	19.169	0.9619	10.593	0.7702	0.355187	0.13161	0.0060609	0.0272742	3.75722	0.375204	2.1677	0.5352	0	0	0.2057	0.1957	0	0	0	0
Sol 789	811	82.3144	2.93869	0	0	0.466998	0.181214	16.1197	0.572616	6.87623	0.397768	0.0231917	0.0526811	0	0	3.39186	0.387131	1.18742	0.265092	0	0	0.234403	0.147652	0	0	0	0
Sol 789	812	78.528	4.30957	0.2432	0.658751	0.150293	0.139248	6.57611	0.360666	5.46376	0.334713	0.09765	0.0813184	0	0	5.76137	0.226722	0.6084	0.155203	0	0	0.0702318	0.0862295	0	0	0	0
Sol 789	813	61.3652	2.20836	0.64076	0.92242	0.259447	0.141409	7.20189	0.256719	6.91891	0.390343	0.205653	0.138693	0.0686872	0.0734878	8.24917	0.319802	0.815281	0.198229	0	0	0.0896321	0.107305	0	0	0	0
Sol 789	814	58.1708	2.08329	0	0	0.364554	0.157398	9.2612	0.330056	8.15547	0.438525	0.139023	0.107032	0	0	6.71795	0.262124	1.55883	0.318699	0.021067	0.03561	0.0838168	0.0710537	0	0	0	0
Sol 789	815	44.0874	1.59559	1.20002	0.846733	0.705367	0.200275	14.4598	0.51849	11.4009	0.571018	0.307014	0.155289	0.0742415	0.0713248	5.7522	0.328498	2.65537	0.40192	0.0149379	0.0299654	0.156945	0.116586	0	0	0	0
Sol 789	816	46.2408	2.58843	1.69356	1.14874	0.653245	0.213948	17.7435	0.642713	11.0788	0.579012	0.299842	0.134844	0.0710816	0.0722705	4.35307	0.32195	1.907	0.512851	0	0	0.1801	0.180749	0	0	0	0
Sol 789	817	48.6391	1.79001	0	0	0.537377	0.167621	15.4823	0.78547	10.0872	0.527529	0.370483	0.135183	0.0374161	0.0507907	4.76944	0.260669	2.21236	0.594506	0	0	0.24992	0.145324	0.0158749	0.0306954	0	0
Sol 789	818	59.1076	2.15933	0	0	0.636371	0.184721	7.09214	0.258173	9.78544	0.500958	0.218186	0.138966	0.0462212	0.0621201	4.87888	0.270461	2.0097	0.366689	0.0150746	0.0289176	0.0920423	0.0796313	0	0	0.0158938	0.0307348
Sol 789	819	46.9307	2.51272	0	0	0.679497	0.194051	13.8382	0.493312	9.76242	0.506042	0.1257	0.140516	0	0	3.56046	0.378536	2.37717	0.389684	0	0	0.129546	0.101255	0	0	0	0
Sol 789	820	40.9975	1.48126	0.484616	1.16728	0.714059	0.204879	20.654	1.04248	12.0185	0.604007	0.322723	0.163634	0.00765486	0.0295688	4.99743	0.220325	2.97779	0.546514	0	0	0.202527	0.136548	0	0	0	0
Sol 789	821	41.1036	1.53334	1.10878	0.874426	0.71951	0.205558	15.0845	0.538539	12.5038	0.632697	0.598987	0.161271	0.0518067	0.0643495	6.24218	0.24917	3.19873	0.396051	0.0811051	0.0775252	0.110537	0.0904218	0.0315884	0.0431211	0.00201072	0.00960117
Sol 789	822	41.9258	1.56391	0	0	0.687698	0.198799	17.2857	0.621754	12.0678	0.618712	0.156687	0.115986	0.0260338	0.0398282	3.77189	0.3672	3.37598	0.385501	0.0874606	0.0763457	0.138354	0.106455	0	0	0.01449	0.029619
Sol 789	823	40.5867	1.4829	0.392268	0.9178	0.814301	0.227298	27.6862	1.39873	13.5612	0.680142	0.23856	0.150095	0.0319762	0.0453501	4.10393	0.331007	2.29927	0.513975	0	0	0.308622	0.217661	0	0	0	0
Sol 789	824	28.0306	1.11145	0	0	1.2385	0.299682	35.8373	1.28882	13.0319	0.705139	0.409044	0.150929	0.0315176	0.046512	6.33561	0.293417	2.72687	0.482283	0	0	0.402448	0.154228	0	0	0	0
Sol 789	825	27.8136	1.46283	1.81189	1.76457	1.09438	0.272619	23.3557	0.844471	12.715	0.645726	0.52613	0.163087	0.0600058	0.0689712	11.7985	0.454143	2.708	0.568295	0	0	0.246927	0.14785	0.1432	0.1544	0	0
Sol 789	826	47.8242	1.84849	0.242552	0.716809	0.758833	0.220354	7.29283	0.272862	7.99524	0.454612	0.467523	0.160362	0.13034	0.11454	11.3983	0.46267	1.69058	0.334687	0	0	0.0833672	0.0719455	0	0	0.00913358	0.0227823
Sol 789	827	57.0856	2.48409	0.0337541	0.748624	0.237463	0.165814	3.41133	0.275462	5.06797	0.51659	0.219821	0.13728	0.0520008	0.0671458	6.14322	0.424915	1.18251	0.289176	0	0	0.0214907	0.0363147	0	0	0.00866961	0.0224086
Sol 789	828	70.445	3.5639	0	0	0.729192	0.547331	14.0799	0.7073	15.8919	1.021	0.587271	0.357887	0.2031	0.2014	13.7393	0.7427	2.0191	0.5201	0.0334	0.0643	0.1468	0.1571	0	0	0.0082	0.0268
Sol 789	829	36.356	1.52836	0	0	1.00893	0.291578	17.7488	0.698777	13.9744	0.891337	0.0498847	0.110197	0.0378407	0.0515178	5.05103	1.1447	2.4745	0.350015	0.0380762	0.0471494	0.175858	0.122239	0	0	0	0
Sol 789	830	34.9621	1.40206	0	0	1.08837	0.283931	25.4384	1.31737	18.6817	0.895732	0.150211	0.118454	0	0	6.03065	0.340582	2.76055	0.438096	0	0	0.188995	0.168404	0.706399	0.213755	0.0714607	0.0788213
Sol 789	831	28.7066	1.06172	0.99731	1.03756	1.07263	0.272282	36.3912	1.29378	17.32	0.82116	0.241655	0.149047	0	0	7.87647	0.306351	3.18526	0.398226	0	0	0.397084	0.159474	0	0	0.0147669	0.0304694
Sol 789	832	32.7798	1.6844	1.01719	0.98097	0.93769	0.247836	33.3847	1.6733	18.899	0.869321	0.5501	0.1981	0	0	7.0927	0.3904	2.54045	0.39824	0	0	0.4791	0.1935	0	0	0.0662776	0.0729239
Sol 789	833	39.7806	1.43731	2.72268	1.32835	0.732703	0.208127	25.7652	0.913825	15.0735	0.722089	0.666932	0.233992	0.0645398	0.0746011	4.01201	0.478263	2.61047	0.399257	0	0	0.456348	0.144896	0	0	0	0
Sol 789	834	47.8126	1.73617	0.484268	1.11228	0.679864	0.196676	16.2011	0.581788	12.9843	0.637884	0.382424	0.158271	0.0147625	0.0366555	5.37433	0.229339	2.47366	0.390441	0	0	0.217169	0.142836	0.304535	0.156064	0.0680454	0.0601838
Sol 789	835	45.2763	1.61842	2.89387	0.661972	1.03131	0.242668	27.1181	0.965246	15.1064	0.591531	0.389561	0.160371	0.0844839	0.0730769	7.0078	0.267612	2.82564	0.379207	0	0	0.3546	0.231119	3.75439	0.365196	1.30848	0.282566
Sol 789	836	43.1577	2.25241	0.738286	1.59247	0.777032	0.215608	20.5916	0.730736	13.5417	0.655043	0.126701	0.100234	0	0	5.93473	0.335698	2.44248	0.555992	0	0	0.141674	0.108692	2.26377	0.540381	0.521433	0.134944
Sol 789	837	37.8727	1.37162	0	0	0.823575	0.225854	27.5099	0.976646	13.9657	0.679168	0.243191	0.211024	0.0475893	0.0593776	5.87585	0.230617	2.33421	0.387997	0	0	0.307999	0.162263	0.352679	0.159471	0	0
Sol 789	838	21.464	1.1536	0.252435	0.933249	0.576802	0.177372	38.641	1.36935	16.7403	0.799931	0.7664	0.263689	0.0453245	0.0583818	4.2259	0.453653	2.43753	0.392469	0	0	0.492884	0.132093	0	0	0.00575504	0.017115
Sol 789	839	26.5521	1.02441	0.157706	0.985575	0.800009	0.226251	33.9525	1.22116	13.908	0.737097	0.467485	0.162106	0.0852956	0.0912661	5.75874	0.313749	2.39029	0.478947	0	0	0.476286	0.171124	0	0	0	0
Sol 789	840	28.4873	1.16116	0.904974	1.04244	1.1594	0.294213	31.0658	1.18095	17.5325	0.883652	0.322845	0.156631	0.046782	0.0608581	8.39093	0.342144	2.20279	0.47037	0	0	0.313589	0.165162	0	0	0	0
Sol 789	841	29.4665	1.14	0.899618	0.839955	1.3567	0.313089	16.9655	0.861389	14.2897	0.7434	0.370663	0.139529	0	0	6.89695	0.295929	2.47631	0.372051	0.0419565	0.0470841	0.277302	0.141025	0	0	0	0
Sol 789	842	23.8569	0.881246	1.13083	1.25749	0.953793	0.247503	22.8351	0.810978	13.0759	0.652595	0.3895	0.227666	0	0	6.8815	0.390875	2.30343	0.381543	0.00244248	0.0114149	0.250765	0.152639	0	0	0	0
Sol 789	843	33.1037	1.22248	0	0	1.1995	0.290485	27.6312	0.993892	16.0317	0.764974	0.164739	0.177657	0.0437421	0.0569328	4.13093	0.603256	3.1716	0.485875	0	0	0.251107	0.150247	0	0	0.044553	0.0533373
Sol 789	844	36.5209	1.33706	0.23207	0.854088	1.56863	0.342371	23.0589	0.824453	17.2684	0.795972	0.21016	0.140569	0	0	3.95704	0.346957	3.38543	0.388771	0.00390926	0.0143841	0.118871	0.0949664	0	0	0.30865	0.141076
Sol 789	845	37.2713	1.93397	0.962441	0.868454	1.13891	0.280473	20.447	1.04158	15.1304	0.716299	0.2726	0.223313	0	0	4.14411	0.323631	3.04162	0.498763	0.0343731	0.0437808	0.203626	0.136547	0	0	0	0
Sol 789	846	46.3597	1.68235	0	0	0.852201	0.227134	11.6547	0.41442	12.6297	0.605871	0.1409	0.152916	0.105194	0.0911364	4.5884	0.385279	2.82789	0.401606	0.0801671	0.0699331	0.105352	0.0860908	0	0	0	0
Sol 789	847	60.3053	3.09885	0.209505	0.972738	0.26912	0.169402	9.48625	0.4847	6.96672	0.397706	0.154307	0.115408	0.0623868	0.0646257	6.59115	0.258115	1.62904	0.327891	0	0	0.0961446	0.0798206	0	0	0	0
Sol 789	848	62.8026	3.20441	0	0	0.274858	0.147656	6.88857	0.256155	6.72098	0.47563	0.241798	0.145274	0.10857	0.105498	6.9309	0.322888	1.4996	0.313365	0.00764506	0.0210632	0.0565435	0.0569295	0	0	0.0101288	0.0241735
Sol 789	849	33.464	1.40463	1.55659	1.54059	1.02316	0.282563	26.1583	1.33537	13.2805	0.753722	0.572631	0.20128	0	0	7.71016	0.481915	2.65166	0.433032	0	0	0.393028	0.176374	0	0	0	0
Sol 789	850	15.7034	0.631181	0	0	0.97683	0.257309	43.5754	2.19941	14.357	0.75967	0.496401	0.168073	0.0347234	0.0494043	4.95668	0.343528	2.838	0.400648	0	0	0.657896	0.171239	0	0	0	0
Sol 789	851	29.7376	1.21687	1.0066	1.34829	2.36921	0.396867	28.8164	1.09388	15.1244	0.829128	0.465921	0.160449	0.0561936	0.0701449	6.09211	0.392526	2.78906	0.402772	0.0259663	0.0341972	0.423155	0.153867	0	0	0.0140975	0.0304748
Sol 789	852	42.8486	1.59662	1.23387	0.869677	4.04557	0.382816	20.9323	0.755571	17.0863	0.805045	0.343485	0.159326	0.0506651	0.064269	4.45397	0.305807	3.07272	0.397173	0	0	0.158852	0.117826	0	0	0.23779	0.147677
Sol 789	853	42.2097	1.53491	0.234912	1.1377	5.05942	0.27703	20.8667	0.742901	18.2845	0.824763	0.23425	0.148609	0	0	3.99405	0.347128	3.04717	0.400966	0	0	0.250598	0.152622	0	0	0.259583	0.154373
Sol 789	854	45.0481	1.62326	0.176279	0.809243	4.24666	0.350831	19.8983	0.705976	18.0373	0.809737	0.115326	0.0933735	0.0853133	0.0901462	3.30268	0.3954	3.3135	0.392944	0	0	0.270786	0.156907	0	0	0.208532	0.139457
Sol 789	855	48.2787	1.74047	0	0	2.66384	0.422974	18.8816	0.671187	18.01	0.805807	0.0615176	0.0552858	0.10019	0.0896891	2.68932	0.402131	3.44031	0.385791	0	0	0.620565	0.154972	0.0195581	0.0328837	0.111931	0.0915261
Sol 789	856	47.0043	1.69827	0.823645	1.12883	2.62964	0.417694	18.1876	0.646923	18.4339	0.826154	0.0469568	0.0488098	0.0653128	0.0753488	2.90343	0.40354	3.33895	0.391123	0.00124304	0.0103421	0.497505	0.135571	0.335869	0.162278	0.00539716	0.0160915
Sol 789	857	46.4059	1.67935	0	0	2.83518	0.416377	18.4323	0.655361	17.7478	0.7991	0.103357	0.0854632	0.0625138	0.0632321	3.1623	0.400523	3.39094	0.388332	0.00225158	0.011458	0.522256	0.13362	0.0533122	0.0500919	0.0343233	0.0446872
Sol 789	858	45.8156	1.65465	0	0	3.2831	0.420925	18.5118	0.657516	17.3576	0.788343	0.0989991	0.0840828	0.016774	0.0380546	2.85671	0.403394	3.4765	0.382464	0	0	0.728291	0.177917	0.0941121	0.0784958	0.107499	0.0882629
Sol 789	859	38.6218	2.02615	1.13734	0.848369	3.03164	0.422195	17.715	0.630106	16.2079	0.751649	0.164627	0.120338	0.0360424	0.0488897	3.3394	0.558522	3.08745	0.397816	0	0	0.794248	0.191389	0.00139995	0.00669974	0.0392403	0.0442898
Sol 789	860	44.4679	1.6067	0.0934142	0.8043	3.00141	0.42595	18.5332	0.657995	17.4352	0.786304	0.105138	0.0864577	0.0440581	0.0566605	3.22167	0.39639	3.31035	0.39269	0.00140027	0.00990194	0.767143	0.185875	0	0	0.0470006	0.0482237
Sol 789	861	46.0044	1.65662	2.26242	1.24589	2.98074	0.42615	18.1294	0.643353	18.0721	0.809878	0.112771	0.0913313	0	0	3.2568	0.397172	3.4799	0.384526	0.0258339	0.0401982	0.928857	0.217594	0	0	0.00553306	0.0161506
Sol 789	862	45.9857	1.66242	2.24176	1.23637	2.86096	0.424647	18.5341	0.659102	18.0194	0.809304	0.115775	0.0937214	0.121646	0.102276	3.24378	0.397581	3.38362	0.385558	0	0	0.75872	0.184247	0	0	0.0771133	0.0681595
Sol 789	863	45.7238	1.68692	0	0	2.76924	0.412644	19.902	0.7152	17.065	0.791057	0.0801682	0.069951	0.0844011	0.0866274	3.17074	0.40018	3.39019	0.380096	0	0	0.276444	0.158264	0	0	0.149897	0.112655
Sol 789	864	42.8514	1.68884	0.442563	0.883126	2.32454	0.389303	20.8901	0.784492	17.2139	0.845222	0.204007	0.134367	0.0736949	0.0823634	3.94152	0.335195	2.92548	0.377853	0.00914967	0.0241082	0.200104	0.134815	0	0	0.0906577	0.0829546
Sol 789	865	38.0208	1.63198	0.156642	0.977128	2.39608	0.413194	22.3867	0.988835	16.005	0.956587	0.907265	0.228422	0.140407	0.123525	6.63654	0.423519	2.6955	0.368235	0.00152213	0.0124026	0.265797	0.13218	0	0	0.0136551	0.0310095
Sol 789	866	24.2804	1.2745	1.16861	1.22727	1.41484	0.45793	25.4827	1.27266	13.7647	1.66189	0.696156	0.221254	0.124271	0.120365	6.7298	0.494348	2.43038	0.357621	0	0	0.29112	0.106687	0	0	0	0
Sol 789	867	27.0069	1.18677	1.90193	1.19802	1.14541	0.317558	23.0746	0.974886	15.8587	0.90021	0.708004	0.219809	0.100896	0.107435	9.91902	0.58375	2.63425	0.392338	0	0	0.28259	0.140257	0	0	0	0
Sol 789	868	44.5102	2.29152	0	0	1.15712	0.322064	20.7714	0.872941	17.8452	1.15605	0.53866	0.185845	0.0429718	0.059907	10.8799	0.481027	3.141	0.565564	0.0237939	0.0406569	0.182756	0.136208	0	0	0	0
Sol 789	869	45.3864	2.4241	1.7825	1.1467	0.629991	0.185324	12.8817	0.470781	10.7364	0.796523	0.335393	0.165835	0.0455077	0.0589018	12.1909	0.47043	1.76984	0.346371	0.0196242	0.0332764	0.129554	0.101997	0	0	0	0
Sol 789	870	54.916	1.98184	0	0	0.431117	0.1717	15.6648	0.556462	9.32579	0.494629	0.243924	0.151243	0.0556458	0.0674695	9.40895	0.363022	1.96149	0.362506	0.000945216	0.00930292	0.156603	0.116304	0	0	0	0
Sol 789	871	58.544	2.17116	0	0	0.73177	0.206641	12.0766	0.44045	12.4905	0.624644	0.074113	0.0648751	0.00625249	0.0258672	3.25917	0.454712	2.85301	0.394498	0.114393	0.092995	0.0923761	0.0822385	0	0	0.0129122	0.0282017
Sol 789	872	56.6629	2.07023	0.391186	0.750468	1.08075	0.268964	13.8377	0.496094	13.4753	0.644985	0.068709	0.0611665	0	0	2.77706	0.512443	3.19723	0.397528	0.105939	0.0882212	0.0974407	0.0809139	0	0	0.02247	0.0330063
Sol 789	873	47.6705	1.71637	1.1469	1.1888	1.43726	0.324473	20.4343	0.726826	15.1959	0.71117	0.537606	0.137244	0.100508	0.0887408	4.99893	0.209192	3.11396	0.399481	0.05389	0.0550037	0.17334	0.124575	0	0	0	0
Sol 789	874	42.329	2.24968	0	0	1.41001	0.319519	23.2332	1.21608	13.7959	0.667137	0.448451	0.149691	0.0921309	0.0896508	4.4983	0.403447	3.284	0.559459	0	0	0.186356	0.130275	0	0	0	0
Sol 789	875	46.2165	2.3513	0	0	1.11841	0.273524	16.8504	0.846	12.2214	0.8444	0.369643	0.156009	0.0408473	0.0527555	4.66026	0.25902	2.523	0.5608	0.0249349	0.0330627	0.1555	0.1637	0	0	0	0
Sol 789	876	49.0137	1.763	0	0	0.75364	0.212049	18.7253	0.944507	12.1066	0.599943	0.224762	0.203266	0	0	6.90153	0.268997	1.70761	0.481695	0	0	0.264337	0.155631	0	0	0	0
Sol 789	877	30.7161	1.11685	1.61282	1.26825	0.629818	0.188168	28.7338	1.0186	16.1275	0.760777	0.209733	0.198792	0.0391659	0.0526544	12.3197	0.471422	1.78343	0.345748	0	0	0.376766	0.160487	0	0	0	0
Sol 789	878	14.5929	0.550924	2.1291	1.49946	0.917485	0.2439	40.1078	1.42547	17.5129	0.838817	0.427502	0.150017	0.0766704	0.0848548	9.88613	0.537281	2.55368	0.53822	0	0	0.647454	0.162273	0	0	0	0
Sol 789	879	23.5835	1.2257	2.89185	1.5589	1.11672	0.277635	41.5412	2.0814	17.2529	1.1643	0.467203	0.151535	0.423512	0.154169	3.7964	0.515	3.8914	0.498	0	0	0.941083	0.220703	0	0	0	0
Sol 789	880	37.6328	1.36345	2.57093	1.31445	0.897268	0.239952	28.6348	1.01621	15.7628	0.749908	0.318192	0.161549	0.275187	0.161777	3.7339	0.371198	3.13597	0.399145	0.00627673	0.0188302	0.4289	0.2162	0	0	0	0
Sol 789	881	52.7846	2.6812	0	0	0.999454	0.257358	21.8734	1.0974	13.8463	0.666861	0.100805	0.0840222	0	0	5.7236	0.3182	2.4975	0.5595	0	0	0.2283	0.2073	2.6531	0.5626	0.194433	0.134451
Sol 789	882	42.1063	1.52032	0.717961	1.24575	0.857293	0.233256	28.2902	1.4319	14.1523	0.696907	0.205637	0.197726	0.0110664	0.0335964	5.84889	0.327393	2.38706	0.558996	0	0	0.231621	0.210313	1.58245	0.319962	0.259433	0.154906
Sol 789	883	33.2148	1.26851	1.30768	1.27927	0.897651	0.24311	19.8044	1.00813	14.0873	0.726209	0.283582	0.132623	0.0630216	0.0714217	5.41715	0.659172	3.00239	0.36301	0.0164248	0.0324016	0.26783	0.126866	0.397597	0.21355	0.175435	0.126076
Sol 789	884	26.084	1.09741	0.539225	1.02449	0.898581	0.244469	31.8524	1.22438	13.2943	0.750644	0.481354	0.165707	0	0	5.9778	0.343731	3.31107	0.371616	0	0	0.52928	0.173518	0	0	0	0
Sol 789	885	19.9193	0.819651	2.24706	1.74162	0.832788	0.265213	46.4078	1.81704	11.9978	0.809509	0.591577	0.196001	0.0351548	0.0522017	6.24244	0.408412	3.62099	0.376299	0	0	0.606734	0.198921	0	0	0	0
Sol 789	886	30.6692	1.59357	2.11726	1.52436	1.24686	0.306829	36.5291	1.35624	15.2648	0.778515	0.574023	0.18073	0	0	6.70392	0.337135	3.44826	0.380591	0	0	0.384713	0.154123	0.0963568	0.0961034	0	0
Sol 789	887	30.7254	1.18529	2.35304	1.53685	0.992834	0.267106	38.5896	1.94276	15.2135	0.790437	0.446209	0.161069	0.0567195	0.0704234	6.81161	0.363418	3.58399	0.39476	0	0	0.396734	0.149367	0.885627	0.245773	0	0
Sol 789	888	38.792	1.9855	2.346	1.96471	1.64807	0.558008	31.1707	1.56377	17.5263	2.17819	1.00273	0.30823	0.106374	0.119705	13.034	1.35983	2.86458	0.479385	0	0	0.528966	0.181024	0.001	0.0124	0	0
Sol 789	889	29.9279	1.91524	2.66326	2.14646	1.03254	0.574464	10.8361	0.684828	12.8468	2.21976	0.63245	0.235169	0.152202	0.152035	12.5183	1.13649	1.77537	0.418386	0.0395831	0.0521204	0.252056	0.142458	0	0	0	0
Sol 789	890	31.0812	1.21586	1.66174	1.37908	0.669826	0.226337	24.7865	1.25078	12.0243	0.637829	0.363529	0.137177	0.0224627	0.0410922	6.44353	0.353652	2.19025	0.444504	0.0206294	0.0342834	0.317699	0.149474	0	0	0	0
Sol 789	891	29.0043	1.07276	1.44043	1.05162	1.08871	0.274018	35.0239	1.77194	12.2405	0.647406	0.443857	0.168391	0.0499319	0.06253	6.39147	0.354757	2.59803	0.513882	0	0	0.581706	0.167835	0	0	0	0
Sol 789	892	23.7502	0.887812	0.565487	0.982332	1.02508	0.265977	36.2149	1.32544	13.0609	0.704526	0.566498	0.178476	0.105978	0.0936656	8.93555	0.359027	2.95748	0.385175	0	0	0.443885	0.156455	0	0	0	0
Sol 789	893	24.4865	0.927669	0	0	0.790501	0.226021	35.8606	1.30836	15.0528	0.774118	0.164511	0.179451	0.0560672	0.0680617	4.42146	0.611952	2.68251	0.510108	0	0	0.43995	0.153985	0.117484	0.0945144	0	0
Sol 789	894	28.2501	1.03157	0	0	1.05579	0.26918	34.9843	1.77996	15.9973	1.09968	0.320345	0.163637	0	0	3.49326	0.548745	2.27996	0.545878	0	0	0.43643	0.21281	0	0	0	0
Sol 789	895	42.6078	1.61385	0.139048	0.781081	0.983821	0.261823	20.9086	1.06966	16.7434	1.09608	0.203315	0.139833	0.0899253	0.0955156	4.2223	0.453572	4.2094	0.449577	0.067915	0.0663639	0.238885	0.14503	0	0	0	0
Sol 789	896	51.0376	1.94352	0.122425	0.69961	0.811623	0.233021	11.4765	0.429236	14.632	0.705469	0.334734	0.167095	0.0135304	0.0363024	3.16545	0.428942	3.20453	0.386998	0.209423	0.136216	0.0465055	0.0513981	0	0	0.0271023	0.0345367
Sol 789	897	51.3043	1.85306	0	0	0.752103	0.210625	9.37149	0.339535	13.4061	0.62756	0.680468	0.168471	0.00433922	0.0232922	5.67004	0.223453	2.7202	0.39966	0.10057	0.0846353	0.0617845	0.054812	0	0	0.0509035	0.053089
Sol 789	898	51.4789	2.61831	0.235566	0.725048	0.660976	0.190181	11.7919	0.419918	11.4906	0.563735	0.275676	0.15844	0	0	5.56837	0.219335	2.40216	0.392064	0.0358477	0.0418032	0.0954075	0.0793384	0	0	0.000200011	0.00645035
Sol 789	899	60.8839	2.17988	0.183562	0.645586	0.574814	0.170815	7.31617	0.260969	8.54506	0.448055	0.2053	0.195905	0.118821	0.0994983	4.9527	0.33048	1.8017	0.494118	0.0204622	0.034978	0.0693	0.0852275	0	0	0.00659612	0.0156755
Sol 789	900	65.7306	2.35316	0	0	0.230293	0.166072	4.16119	0.315825	5.10357	0.326836	0.234127	0.211881	0.0876595	0.0799282	4.51597	0.367756	0.887825	0.301006	0	0	0.0267401	0.0394471	0.00591972	0.0158689	0.0129409	0.027624
Sol 789	901	61.1662	2.21148	0	0	0.38315	0.164735	5.4981	0.2778	5.94752	0.354452	0.1774	0.1792	0	0	3.5856	0.538	0.682831	0.170914	0	0	0.0297485	0.0383573	0	0	0	0
Sol 789	902	65.0004	2.34127	0	0	0.425684	0.169495	4.14118	0.321024	7.17653	0.392458	0.219023	0.194528	0	0	7.96269	0.312695	0.908279	0.216134	0.0175889	0.0320849	0.0308979	0.0422282	0	0	0.00414549	0.0126363
Sol 789	903	61.6646	2.31233	0.324436	0.940796	0.474407	0.185323	6.0171	0.306422	8.54167	0.488291	0.233519	0.196089	0.0288459	0.0435584	9.33205	0.373197	1.29775	0.286465	0.00361694	0.013367	0.0385931	0.058202	0	0	0.027344	0.0350621
Sol 789	904	54.9954	1.97781	0.498911	0.722743	0.30045	0.147183	10.1038	0.359481	8.14034	0.445496	0.354875	0.163782	0.0447507	0.0545548	4.93757	0.253084	1.18147	0.263752	0	0	0.120617	0.133936	0	0	0	0
Sol 789	905	66.1315	2.37662	0.162901	0.646202	0.277876	0.166036	6.67978	0.339056	7.09951	0.400757	0.192152	0.131456	0.00951405	0.0375161	5.81077	0.23194	1.05609	0.34894	0	0	0.0743723	0.089809	0.00742022	0.0188245	0	0
Sol 789	906	77.9812	2.8254	0	0	0.143916	0.129282	8.4408	0.428229	5.52832	0.373028	0.085192	0.0731004	0.0346904	0.048392	6.04493	0.278241	0.85936	0.20737	0	0	0.0658364	0.0826685	0	0	0	0
Sol 789	907	83.7672	3.00279	0	0	0.186587	0.152831	7.2382	0.259499	5.43194	0.331582	0.0372603	0.0601827	0	0	2.60761	0.400617	0.792833	0.193512	0	0	0.0724051	0.0629285	0	0	0	0
Sol 789	908	74.9368	3.7857	0	0	0.177584	0.132076	12.9642	0.6513	6.75499	0.392262	0.0615	0.0777	0	0	2.2602	0.5449	0.9688	0.3211	0	0	0.1086	0.1246	0	0	0	0
Sol 789	909	64.905	2.39066	0.190466	0.69612	0.270107	0.176853	14.5924	0.544071	7.1141	0.414866	0.124671	0.144778	0.0854703	0.0904599	5.15032	0.315402	1.48522	0.30973	0	0	0.144919	0.109995	0	0	0	0
Sol 789	910	58.466	2.15112	0	0	0.343283	0.14689	11.6441	0.590017	6.87729	0.416215	0.1263	0.100059	0.0491218	0.062105	4.10198	0.722783	1.60108	0.322314	0	0	0.180507	0.195231	0	0	0	0
Sol 789	911	33.5615	1.239	0.181697	0.919068	0.530761	0.177259	30.6223	1.10042	9.86473	0.556939	0.217991	0.219203	0	0	3.8014	0.686372	2.87995	0.398913	0	0	0.479066	0.171385	0	0	0	0
Sol 789	912	15.2746	0.613796	0.88162	1.06	0.995485	0.260953	44.7272	1.64014	15.3021	0.803376	0.414964	0.162329	0	0	5.62067	0.291237	4.24406	0.239123	0	0	0.520134	0.184458	0	0	0	0
Sol 789	913	23.626	0.867449	1.3831	1.9609	1.1253	0.279873	31.5345	1.1209	14.1703	0.707412	0.331463	0.158319	0.0938915	0.0838282	4.91051	0.256857	3.18678	0.627323	0	0	0.352057	0.163885	0	0	0	0
Sol 789	914	47.343	2.42037	0.55666	1.00234	0.707851	0.206766	30.4399	1.53277	11.844	0.628727	0.311845	0.157836	0	0	4.90605	0.317117	3.00843	0.399921	0	0	0.450619	0.156852	0	0	0	0
Sol 789	915	15.4308	0.82005	2.19297	1.51203	0.667432	0.19503	41.1447	1.45812	13.5619	0.704175	0.35214	0.163306	0	0	4.20753	0.315969	3.23957	0.39023	0	0	0.627931	0.157462	0	0	0	0
Sol 789	916	15.5109	0.61456	0	0	0.86987	0.237104	40.3764	1.45532	15.6153	0.789969	0.394696	0.146755	0	0	5.58145	0.297262	2.76123	0.399069	0	0	0.579753	0.153863	0	0	0	0
Sol 789	917	28.3633	1.14138	2.50371	1.20437	1.11255	0.29231	33.7172	1.6898	14.4272	0.76648	0.451737	0.162939	0	0	7.4608	0.4095	3.4774	0.5446	0	0	0.5877	0.209	0	0	0	0
Sol 789	918	22.002	0.843535	0	0	0.91309	0.247313	32.9563	1.17217	14.4789	0.731414	0.44596	0.155208	0.0568844	0.0688144	4.4797	0.302253	3.22239	0.67907	0	0	0.365486	0.163825	0	0	0	0
Sol 789	919	14.5693	0.774281	0.899577	1.04074	1.09657	0.272972	39.7935	1.41178	14.4052	0.727371	0.388025	0.212412	0	0	4.84627	0.226142	3.80344	0.474547	0	0	0.535176	0.140735	0	0	0	0
Sol 789	920	15.2285	0.579883	0.587938	1.02545	1.08414	0.274818	38.4038	1.94452	14.9554	0.756111	0.363952	0.219401	0.082162	0.0881438	4.86038	0.285881	3.05972	0.502463	0	0	0.461255	0.183729	0	0	0	0
Sol 789	921	33.8987	1.25197	0.463122	0.888017	0.535636	0.190833	26.0714	0.928054	13.4997	0.674702	0.269138	0.158062	0.00367183	0.0238418	4.57964	0.298653	2.81528	0.402571	0	0	0.387819	0.186962	0	0	0	0
Sol 789	922	30.5838	1.15218	0	0	0.595827	0.213095	29.6208	1.49459	13.1077	0.669788	0.426934	0.15448	0.00984597	0.0330371	4.39426	0.318276	3.14798	0.385432	0	0	0.400998	0.154741	0	0	0	0
Sol 789	923	42.3385	1.63284	1.04007	0.942518	0.237275	0.167583	26.5443	1.03651	9.106	0.535341	0.405731	0.147967	0.0944691	0.0967959	4.69043	0.354098	2.73895	0.356128	0	0	0.265522	0.141626	0	0	0	0
Sol 789	924	63.0717	2.30566	0	0	0.187827	0.148686	10.1623	0.514739	4.22789	0.778771	0.0555336	0.0806099	0.00251324	0.0218149	2.67369	0.65836	0.554724	0.255789	0	0	0.0863584	0.105931	0	0	0	0
Sol 789	925	75.587	3.99652	0.579492	0.709002	0.316472	0.159569	8.22467	0.298891	7.44961	0.417353	0.192849	0.125823	0.00853321	0.0303964	6.11298	0.29564	0.941879	0.223971	0	0	0.0888338	0.0772885	0	0	0	0
Sol 789	926	65.6175	3.38365	0	0	0.19537	0.160285	10.1009	0.359905	9.08517	0.472541	0.181132	0.12822	0	0	5.33603	0.211194	1.22447	0.380129	0	0	0.0822262	0.0699891	0	0	0	0
Sol 789	927	40.8633	1.49004	0	0	0.556692	0.172761	21.4666	0.762493	12.9426	0.63982	0.256644	0.151561	0	0	4.4497	0.414374	1.82398	0.346654	0	0	0.216013	0.14168	0	0	0	0
Sol 789	928	52.7524	2.70208	0.149373	0.744792	0.464469	0.170249	13.1547	0.66734	10.7251	0.543913	0.6786	0.237747	0.0223595	0.046653	7.7839	0.306122	1.82718	0.478788	0	0	0.1096	0.125702	0	0	0	0
Sol 789	929	51.0532	2.59645	0	0	0.77981	0.212306	9.97393	0.355403	10.0922	0.509695	0.97241	0.226341	0.0135432	0.035352	7.5738	0.41616	2.0396	0.511014	0.0439108	0.0473878	0.0639771	0.0564013	0	0	0	0
Sol 789	930	58.3945	2.09176	0.0621054	0.656185	0.705238	0.198471	6.69634	0.239389	9.96794	0.498176	0.144436	0.109789	0	0	3.59254	0.564701	1.93549	0.36008	0.0349698	0.0455367	0.032171	0.043128	0	0	0	0
Sol 789	931	48.6811	1.76639	1.74136	1.11354	0.677881	0.193686	15.5245	0.579474	9.34966	0.517146	0.356982	0.146525	0.079481	0.0859085	8.20945	0.346948	1.70051	0.454116	0	0	0.156103	0.116384	0	0	0	0
Sol 789	932	44.1144	1.5921	1.58281	1.67561	0.903792	0.239281	21.7197	0.771524	12.0797	0.614109	0.419485	0.15252	0.0876079	0.0899254	7.99739	0.311214	2.45198	0.534542	0	0	0.283103	0.159272	0	0	0	0
Sol 789	933	35.1776	1.29994	0.962353	0.93473	0.958169	0.249723	25.2286	0.904887	12.6652	0.666704	0.443156	0.154053	0.0912039	0.0945871	4.9536	0.264581	3.69104	0.367616	0	0	0.304916	0.152416	0	0	0	0
Sol 789	934	41.636	1.51517	0.466163	0.808485	1.16376	0.283059	12.0149	0.433714	13.191	0.636728	0.89028	0.212015	0.0409764	0.0549188	6.53689	0.257275	3.29946	0.398649	0.0232273	0.0380022	0.117679	0.0951099	0	0	0	0
Sol 789	935	43.3262	2.22787	0.306075	0.784048	0.856127	0.228683	14.0524	0.501531	13.3059	0.63617	0.498967	0.157951	0.0720249	0.076964	5.00584	0.291188	2.89291	0.402298	0.0757557	0.0675196	0.098359	0.0823011	0	0	0	0
Sol 789	936	43.2101	1.55813	0.678312	1.06728	1.13799	0.27786	12.6129	0.449513	13.788	0.650601	0.197647	0.135725	0.0425898	0.0546909	4.3634	0.429637	3.32001	0.39118	0.118626	0.096711	0.136027	0.105353	0	0	0.0164565	0.0298425
Sol 789	937	29.6039	1.08307	2.16174	1.43161	0.956287	0.253271	35.7148	1.2734	17.078	0.813186	0.405055	0.217176	0.0644896	0.0752298	5.4529	0.21571	3.13892	0.390341	0	0	0.565233	0.143413	0	0	0	0
Sol 789	938	22.5529	0.831458	0.686355	0.976008	1.0964	0.275041	39.8055	2.01422	19.5908	0.907501	0.446521	0.217378	0.0233047	0.0391068	5.38939	0.212258	1.96648	0.50883	0	0	0.595357	0.211139	0	0	0	0
Sol 789	939	18.6319	0.982568	2.14864	1.56181	1.22344	0.295469	42.2306	1.49736	13.5415	1.016	0.532004	0.149179	0.0241807	0.0381264	6.75735	0.373293	3.08814	0.602173	0	0	0.524763	0.19454	0	0	0	0
Sol 789	940	22.291	1.1605	3.1158	2.1471	1.29352	0.306071	32.3175	1.6202	12.5976	0.9274	0.4839	0.1916	0.0697704	0.0791274	6.3499	0.3508	3.3015	0.5567	0	0	0.434541	0.150076	0	0	0	0
Sol 789	941	27.5855	1.4236	0.366573	0.937545	0.990002	0.255498	26.9997	1.3541	14.7347	0.718331	0.451223	0.14756	0.0223366	0.039627	7.34001	0.285937	3.456	0.5464	0	0	0.278756	0.158309	0	0	0	0
Sol 789	942	32.5462	1.19995	0	0	0.852068	0.227038	14.177	0.511761	10.8382	0.561557	0.306871	0.150182	0.0142026	0.0364599	6.77937	0.37759	2.14226	0.376216	0.0158649	0.0312382	0.175066	0.12496	0	0	0	0
Sol 789	943	33.1287	1.70057	1.28724	1.52332	0.840506	0.330174	17.5396	0.93098	11.7902	1.32008	0.508438	0.190275	0	0	14.9456	1.20914	1.95649	0.463865	0.00403098	0.0169879	0.321979	0.11896	0	0	0	0
Sol 789	944	23.4457	0.940744	1.05407	1.09553	0.93494	0.266825	21.1196	1.08921	11.8937	0.711567	0.294866	0.29891	0	0	4.01876	0.931656	2.7445	0.381906	0	0	0.17125	0.198935	0	0	0	0
Sol 789	945	29.8912	1.61303	1.48003	1.30119	0.817625	0.224908	25.7566	0.91392	14.2585	1.01258	0.4501	0.20873	0.0238905	0.0391844	5.326	0.309854	3.04427	0.40078	0.0145286	0.0313611	0.205814	0.13784	0.0711752	0.0620218	0	0
Sol 789	946	26.6304	1.40623	0.194446	1.02952	0.8439	0.32827	28.6113	1.06563	16.3923	1.12256	0.675685	0.177792	0.00496076	0.0251656	9.40492	0.372663	2.71301	0.40384	0.0271843	0.04241	0.341235	0.146674	0	0	0	0
Sol 789	947	23.4528	0.895952	2.64658	1.15931	1.09125	0.277872	38.6641	1.41043	13.258	0.717226	0.54361	0.176649	0.0651813	0.0766714	9.18323	0.371041	3.15339	0.363181	0	0	0.672519	0.200378	0	0	0	0
Sol 789	948	22.9835	0.934092	4.5991	1.6103	0.869292	0.258105	35.2433	1.78962	12.4602	0.727222	0.507254	0.172694	0.0890393	0.0946891	7.94804	0.353841	3.2523	0.391765	0	0	0.548527	0.180002	0	0	0	0
Sol 789	949	20.6065	0.783834	0.440246	1.00279	0.970736	0.256055	40.2729	1.46468	11.0151	0.920904	0.267832	0.244618	0.0372523	0.0516707	4.72795	0.581146	3.30472	0.373448	0	0	0.520239	0.162148	0	0	0	0
Sol 789	950	27.066	1.3996	0	0	0.67541	0.201589	36.7631	1.33012	17.3632	0.830743	0.368323	0.155914	0.00688587	0.0292267	9.3127	0.5074	2.40646	0.386623	0	0	0.4971	0.183	0	0	0	0
Sol 789	951	25.6315	0.938938	0.350435	0.949672	0.623026	0.188962	36.0157	1.27659	18.1912	0.847485	0.45467	0.145797	0.163781	0.124367	7.53156	0.292232	2.5335	0.561	0	0	0.4836	0.1909	0	0	0	0
Sol 789	952	25.121	0.921479	0.495058	2.05953	1.108	0.275555	41.469	2.1144	16.7764	0.806774	0.4056	0.224033	0.387066	0.161687	3.6938	0.528054	3.20464	0.395493	0	0	0.832851	0.199651	0	0	0	0
Sol 789	953	19.0802	0.708111	4.49082	1.52613	1.45804	0.326226	41.3222	1.46535	15.4424	0.764907	0.443894	0.197546	0.302549	0.161629	5.15616	0.203403	4.0713	0.4472	0	0	0.665168	0.234093	0	0	0	0
Sol 789	954	20.2756	0.749758	2.12146	1.40602	0.919333	0.243028	34.6162	1.77139	17.1663	0.817827	0.465635	0.140641	0.0942232	0.086276	9.79737	0.542469	2.53107	0.572663	0	0	0.454193	0.144352	0	0	0	0
Sol 789	955	40.1218	2.06506	0.741668	1.04939	0.677222	0.215255	17.7174	0.631144	14.6233	0.688982	0.384932	0.160943	0.0156048	0.0372543	9.24185	0.357523	1.45892	0.30651	0	0	0.226934	0.145899	0	0	0	0
Sol 789	956	53.4949	1.92773	0.111349	0.701047	0.479335	0.170237	16.485	0.83152	12.8204	0.861456	0.29978	0.15458	0	0	5.92145	0.233477	1.05154	0.242265	0	0	0.204451	0.189274	0	0	0	0
Sol 789	957	63.0952	2.25826	0.287464	0.693153	0.61065	0.179913	10.7447	0.382088	8.758	0.463049	0.180113	0.181216	0.0299278	0.0433743	4.1883	0.454919	1.64252	0.329334	0	0	0.139746	0.107104	0	0	0	0
Sol 789	958	61.5189	2.20419	0.944012	1.07243	0.923773	0.240759	14.3785	0.511419	11.0089	0.55152	0.160555	0.165329	0.0603469	0.0608457	4.48656	0.284141	2.52081	0.396749	0.0128726	0.0284293	0.190115	0.131486	0	0	0	0
Sol 789	959	71.7097	2.56401	0	0	0.572963	0.202062	6.95314	0.352005	10.1641	0.504799	0.0425655	0.0470164	0	0	5.02476	0.205016	1.91161	0.3577	0.0467466	0.0476377	0.0567151	0.0712127	0	0	0	0
Sol 789	960	62.9264	2.29139	0	0	0.930018	0.243287	10.1361	0.368397	11.8223	0.586169	0.0813922	0.0702537	0	0	3.56722	0.441838	2.63798	0.398658	0.105814	0.089392	0.0403826	0.0725739	0	0	0.0103864	0.0244533
Sol 789	961	42.5958	1.56365	1.66891	1.16501	0.988635	0.253412	13.7196	0.487613	14.7022	0.689558	0.305294	0.160923	0.0124495	0.0338768	8.0768	0.484379	2.74674	0.398498	0.0542	0.070616	0.0727	0.0890228	0	0	0	0
Sol 789	962	29.6515	1.0786	1.75644	1.28427	0.97025	0.251771	24.0318	0.852528	14.918	0.715829	0.398811	0.157363	0.0713369	0.070136	16.313	0.621215	2.26639	0.38486	0	0	0.24104	0.149903	0.00747641	0.0192891	0	0
Sol 789	963	33.0195	1.19346	2.99249	1.09107	2.05052	0.370783	19.9028	0.707582	16.7282	0.654698	0.451741	0.175528	0.0984135	0.0871227	10.9393	0.417058	2.3383	0.597675	0.0488085	0.052938	0.215464	0.193447	6.23511	0.312792	0.705176	0.242701
Sol 789	964	28.6022	1.48215	1.71712	1.99064	1.78995	0.365348	25.8395	0.919976	13.7056	0.99673	0.368782	0.149604	0.0367048	0.0503839	6.90563	0.38257	2.39367	0.599276	0	0	0.205757	0.129502	1.91136	0.498664	0.0923647	0.109093
Sol 789	965	29.5368	1.18427	0	0	1.0589	0.280915	17.6755	0.690579	13.4251	0.747571	0.354161	0.12657	0.0809086	0.0866178	5.9323	0.951987	2.60684	0.362475	0.00194513	0.0113126	0.0794265	0.112581	0	0	0	0
Sol 789	966	39.4269	2.0148	2.4361	1.8235	1.4044	0.431523	17.5134	1.01481	19.7506	1.2415	0.47563	0.184036	0.101062	0.11661	7.4411	0.4086	3.6341	0.5294	0	0	0.2787	0.2244	0.2261	0.2058	0	0
Sol 789	967	28.1519	1.35555	1.23612	1.27333	1.63869	0.41528	27.7205	1.41093	14.5135	1.21896	0.300382	0.114366	0.163778	0.140462	4.85065	0.387451	2.19525	0.388763	0.000795634	0.0129753	0.322298	0.117117	1.20346	0.373893	0.0444455	0.062957
Sol 789	968	36.5656	1.62495	0.629014	1.02142	2.16671	0.404659	21.2358	0.969528	16.5437	1.04919	0.267023	0.0973027	0.150743	0.125158	3.94678	0.308688	2.74269	0.365266	0	0	0.329182	0.116686	0	0	0.0352357	0.0445797
Sol 789	969	42.6418	1.67023	0.590462	1.20976	3.10262	0.405629	19.0833	0.711643	17.0519	0.830071	0.13186	0.109223	0.0744475	0.0834063	3.71402	0.309742	3.28202	0.375908	0	0	0.469092	0.15758	0	0	0.0948547	0.0906492
Sol 789	970	44.7353	1.62037	0.644263	0.823705	3.02937	0.418457	17.0918	0.608183	17.1719	0.783012	0.100732	0.0856218	0	0	3.29886	0.388517	3.46788	0.384016	0	0	0.99756	0.230452	0	0	0.0180345	0.0319154
Sol 789	971	45.9063	2.53284	3.55032	1.65226	3.32594	0.420584	18.7402	0.665727	17.1771	0.784409	0.0459	0.0664071	0.00718187	0.0274217	2.8038	0.573789	3.4443	0.55126	0	0	0.805348	0.193667	0	0	0.287304	0.160138
Sol 789	972	38.7933	1.43166	2.21641	1.2373	3.36013	0.419596	20.9254	0.768079	17.2888	0.80217	0.248513	0.150262	0.0711555	0.0702056	7.21989	0.289148	2.83039	0.495131	0	0	0.389334	0.189784	0	0	1.56867	0.439049
Sol 789	973	31.0962	1.5982	0	0	2.8921	0.427695	25.9649	1.3021	16.7367	0.781538	0.3618	0.2315	0.0289375	0.0433314	7.7779	0.4261	2.7869	0.5686	0	0	0.2594	0.2188	0	0	0.908576	0.214418
Sol 789	974	37.6948	1.41714	0.178977	0.816701	2.46208	0.409114	19.707	0.731619	16.7886	0.785993	0.307961	0.147601	0.0829222	0.0889273	5.57223	0.325742	3.03178	0.399834	0.103221	0.0968356	0.432764	0.15174	0	0	0.374639	0.166782
Sol 789	975	35.7586	1.36009	2.09087	1.23794	2.14079	0.362494	19.5739	0.728016	16.6431	0.815038	0.363698	0.137346	0.0474313	0.0595299	3.23279	0.747917	2.59771	0.385655	0.00362388	0.0140061	0.454139	0.157262	0	0	0	0
Sol 789	976	31.8177	1.53916	1.51497	1.1561	1.75933	0.42435	21.8697	0.95971	17.5168	1.27048	0.690524	0.234898	0.157345	0.13601	7.09434	0.50475	2.41651	0.405207	0.0439725	0.0548133	0.355666	0.131883	0	0	0.0129219	0.0304135
Sol 789	977	20.1999	0.924839	0	0	1.11228	0.318185	31.6587	1.267	13.6183	0.82768	0.470059	0.167784	0.0556124	0.0706763	4.9739	0.368391	2.17001	0.387997	0	0	0.357093	0.131428	0.0585557	0.0737262	0	0
Sol 789	978	25.0006	1.28279	1.87011	0.640558	2.05243	0.376014	26.7008	1.00264	14.4378	0.577379	0.26277	0.143339	0.154573	0.118032	3.77146	0.338236	2.20421	0.382874	0	0	0.353071	0.147285	7.15459	0.359799	0.800172	0.19341
Sol 789	979	30.3945	1.1218	1.07371	1.29366	1.44294	0.326938	27.5545	0.987687	15.9659	0.770657	0.206862	0.139453	0.0133075	0.0355035	4.74357	0.276032	2.31864	0.389845	0	0	0.451218	0.149394	2.33829	0.381982	0.146664	0.111747
Sol 789	980	32.1376	1.20455	0	0	1.15168	0.281363	24.8536	0.889678	16.2336	0.768394	0.366115	0.149973	0	0	8.75397	0.343517	2.47336	0.392874	0	0	0.503258	0.156776	0	0	0	0
Sol 789	981	34.3222	1.22957	0.935911	0.528035	1.52341	0.317804	23.3416	1.17484	16.4175	0.635721	0.459498	0.145452	0.161922	0.118402	10.1798	0.3854	2.14992	0.374659	0.0143909	0.0290325	0.381821	0.153715	4.08358	0.450213	0.406054	0.212537
Sol 789	982	24.1321	0.894948	3.22707	1.31551	1.31864	0.308714	19.0497	0.68812	16.8822	0.795871	0.155341	0.16052	0	0	22.3144	0.855068	1.95122	0.352057	0	0	0.139344	0.149147	5.21409	0.264769	0.431295	0.153784
Sol 789	983	20.1878	0.743418	0.0112416	0.837153	0.773712	0.216855	24.7767	0.878713	17.4325	0.804098	0.208808	0.139917	0	0	30.1198	1.13728	1.42314	0.301531	0	0	0.171481	0.175406	0.0216498	0.049845	0	0
Sol 789	984	29.545	1.0873	3.05784	1.36322	0.706857	0.206662	24.7541	0.879274	16.8182	0.790942	0.677081	0.169386	0	0	22.0878	0.841474	1.42649	0.301861	0	0	0.184514	0.129788	0	0	0	0
Sol 789	985	49.0091	1.77269	0	0	0.646981	0.187335	8.78617	0.315675	11.5765	0.566691	0.357596	0.261885	0	0	15.933	0.861455	1.06581	0.245728	0	0	0.0748029	0.0647514	0.523688	0.139536	0.0134798	0.0376356
Sol 789	986	70.1152	2.51158	0.321305	0.687504	0.457935	0.169353	7.13339	0.258559	7.68098	0.422826	0.259655	0.224753	0.060874	0.0719122	8.81285	0.484568	1.05041	0.242151	0	0	0.0380313	0.0663728	0.0741469	0.0905904	0	0
Sol 789	987	67.1362	2.42964	0	0	0.705922	0.200071	8.25401	0.311156	10.0715	0.512758	0	0	0	0	5.99824	0.270865	1.84568	0.349819	0.0361143	0.0458595	0.0203156	0.0491795	0.462206	0.211517	0.0298304	0.0377761
Sol 789	988	69.5212	2.49833	0	0	0.656801	0.188161	4.62571	0.449075	7.38989	0.409899	0.0844643	0.0754273	0	0	3.74772	0.58394	1.50826	0.31267	0.0189655	0.033353	0.0300614	0.0614067	0.145086	0.156247	0.0153901	0.0302823
Sol 789	989	66.3667	2.37374	0	0	0.468352	0.166663	4.45597	0.364026	8.87898	0.455837	0.12138	0.0966367	0.0222992	0.0450796	3.8928	0.48231	1.27526	0.397337	0.0111552	0.0260121	0.0316464	0.0597658	0.0232263	0.0355853	0.0138291	0.0260207
Sol 789	990	42.4914	1.57331	0	0	0.475413	0.180755	13.501	0.48884	12.8729	0.637357	0.296117	0.152762	0.0168724	0.0382624	4.42919	0.67519	1.28766	0.42041	0	0	0.145281	0.110404	0	0	0	0
Sol 789	991	27.5946	1.02891	0	0	0.998674	0.257515	28.0836	0.999917	13.3094	0.683579	0.465364	0.169265	0.108733	0.102304	6.44401	0.262462	2.66375	0.396629	0	0	0.285106	0.159062	0	0	0	0
Sol 789	992	28.3027	1.4596	0.50318	0.872271	1.12935	0.278967	28.4855	1.4283	14.4921	0.715136	0.391492	0.162156	0.0344537	0.0489377	7.0145	0.3859	2.5803	0.5631	0	0	0.25	0.2157	0	0	0.0476817	0.0493516
Sol 789	993	32.2179	1.17443	0.569697	0.880384	1.02101	0.260431	20.1104	1.01988	12.5082	0.628717	0.315409	0.220571	0.163688	0.124572	5.75845	0.321702	2.85483	0.539697	0	0	0.169953	0.170907	0	0	0.444348	0.155586
Sol 789	994	23.6699	0.868955	1.50784	1.37037	1.28183	0.302673	30.1714	1.06994	13.6348	0.684908	0.40352	0.14686	0	0	6.48279	0.261928	2.69934	0.561051	0	0	0.32414	0.163159	0	0	0.0488351	0.0576915
Sol 789	995	30.4942	1.11147	1.53649	0.951381	0.893555	0.240247	26.0384	0.923419	17.0634	0.794326	0.42668	0.149705	0	0	6.0295	0.236959	2.36149	0.536381	0	0	0.369764	0.159927	0	0	0	0
Sol 789	996	26.0812	1.41452	2.663	1.45122	0.939161	0.247628	34.7808	1.83461	15.8767	0.77652	0.460807	0.147165	0.0611921	0.0719515	5.53532	0.218785	2.91443	0.407019	0.0188755	0.0334727	0.484128	0.174974	0	0	0	0
Sol 789	997	20.8976	0.815527	0	0	0.901191	0.249484	40.5035	2.04615	14.3366	0.79587	0.71142	0.199796	0.0381051	0.0534117	8.81673	0.363547	3.21225	0.413428	0	0	0.436657	0.156324	0	0	0	0
Sol 789	998	23.7978	1.25999	2.36993	1.46144	1.4584	0.333113	27.1107	0.989748	16.6884	1.13694	0.958372	0.226422	0.103064	0.0949775	18.6551	1.02097	2.78424	0.409351	0	0	0.37812	0.15992	0	0	0.00914986	0.0233607
Sol 789	999	23.6756	0.890247	1.23992	1.35996	1.30368	0.310054	29.7052	1.07267	16.7225	0.798647	0.819417	0.197771	0.0873321	0.0920859	19.1119	0.735109	2.31035	0.388803	0.0433357	0.0526279	0.370596	0.160023	0	0	0	0
Sol 789	1000	29.6555	1.08069	0.1287	0.861801	0.899728	0.240992	26.5424	0.941669	16.0818	0.761265	0.450948	0.150001	0	0	10.7668	0.418951	2.81532	0.402998	0.050721	0.0560838	0.281458	0.158783	0	0	0	0
Sol 789	1001	20.3965	0.83326	0.222486	0.903605	0.871374	0.242796	29.2577	1.14074	11.3524	0.63817	0.334085	0.136914	0	0	6.56085	0.383847	2.42017	0.391501	0	0	0.347892	0.15694	0	0	0	0
Sol 789	1002	14.3441	0.779551	1.70454	1.85171	1.03035	0.262268	31.3341	1.11485	14.1738	0.716579	0.3432	0.232328	0	0	5.5703	0.314669	1.5791	0.454702	0	0	0.531797	0.149283	0	0	0	0
Sol 789	1003	24.8481	0.91178	0.529846	0.9253	0.963866	0.251373	31.5933	1.1209	18.2745	0.84855	0.447123	0.147194	0	0	7.57379	0.415602	1.58443	0.32207	0	0	0.542642	0.137724	0	0	0	0
Sol 789	1004	26.251	0.960861	0.145772	0.898981	1.21323	0.293631	28.1654	0.999975	16.8004	0.795638	0.441017	0.150375	0.0798266	0.0866304	9.56751	0.369638	2.32338	0.537281	0	0	0.418953	0.150078	0	0	0.0202436	0.0327737
Sol 789	1005	27.1971	0.991442	1.14898	0.924729	1.08795	0.270621	18.0497	0.640815	14.278	0.688243	0.573913	0.145318	0.103528	0.0920064	11.4752	0.439624	2.82261	0.402763	0.0142547	0.0290431	0.206474	0.138594	0	0	0	0
Sol 789	1006	23.0415	0.849565	0.204229	0.982704	1.02912	0.263471	30.4587	1.08212	14.3736	0.719178	0.590908	0.149186	0.123865	0.103331	9.30701	0.360542	2.89262	0.40051	0	0	0.385872	0.150931	0	0	0	0
Sol 789	1007	16.7875	0.912524	0.601023	1.01542	1.17295	0.286014	36.6338	1.29918	12.9083	0.963963	0.621916	0.155964	0.179128	0.131149	9.60371	0.369682	2.4732	0.55954	0	0	0.471154	0.139659	0	0	0	0
Sol 789	1008	18.465	0.69232	0.869271	1.43125	1.18016	0.288885	37.9203	1.34917	15.3976	0.765522	0.557017	0.141562	0.0898655	0.0886091	7.12598	0.279259	2.48773	0.390585	0	0	0.509951	0.130404	0	0	0	0
Sol 789	1009	31.6244	1.20874	1.29672	1.26819	1.2596	0.302247	21.8708	0.808612	14.4505	0.728458	0.584265	0.168011	0.0824294	0.0897491	7.89892	0.3334	2.95713	0.398863	0.00188782	0.0114801	0.200642	0.135721	0	0	0	0
Sol 789	1010	42.1014	1.53559	1.19251	0.836324	1.02996	0.26057	14.3115	0.510283	13.5057	0.651306	0.37599	0.151998	0	0	3.77222	0.633709	3.20794	0.39379	0.0687192	0.0614573	0.0588899	0.0578866	0	0	0.00412309	0.0134252
Sol 789	1011	27.6063	1.43475	0.892552	1.03778	1.21139	0.295001	37.2611	1.32387	12.7059	0.670869	0.693567	0.173256	0.174842	0.124986	6.34388	0.253914	3.98519	0.345237	0	0	0.394271	0.160138	0	0	0	0
Sol 789	1012	19.5774	1.03214	1.22035	1.10294	1.14255	0.283056	39.9347	1.42093	12.2009	0.661096	0.514379	0.231356	0.10333	0.0910464	5.11069	0.437764	3.86274	0.616444	0	0	0.488824	0.241375	0	0	0	0
Sol 789	1013	36.5218	1.87996	0	0	0.695209	0.204099	30.4184	1.53375	13.1989	0.674651	0.395775	0.155055	0	0	5.55552	0.280672	3.38984	0.390261	0	0	0.487797	0.165013	0	0	0	0
Sol 789	1014	36.5687	1.32482	0.695592	1.2644	0.800334	0.221777	25.4643	0.904322	12.5636	0.636654	0.375387	0.15759	0.0343553	0.0488166	10.7146	0.417121	2.87183	0.401537	0	0	0.280757	0.15822	0	0	0	0
Sol 789	1015	39.2418	1.43942	1.51229	0.86192	0.945102	0.248684	17.6586	0.641443	14.7033	0.715875	0.191725	0.132573	0.0418142	0.0542392	5.38954	0.237031	2.4532	0.392998	0.036795	0.0467404	0.18215	0.126655	0	0	0	0
Sol 789	1016	27.2832	1.53977	0.913384	0.916965	0.443058	0.178546	24.1413	1.3246	14.9719	1.11356	0.288019	0.158878	0	0	3.44581	0.426269	1.86792	0.351562	0	0	0.340995	0.149738	0	0	0	0
Sol 789	1017	24.6906	0.917013	0.225008	0.769237	0.613176	0.190536	22.2329	1.13576	15.9365	0.769311	0.30233	0.257937	0.0330714	0.0460761	4.96244	0.542616	1.7791	0.340737	0	0	0.306481	0.152967	0	0	0	0
Sol 789	1018	21.1383	0.797007	1.80548	1.12999	0.789298	0.229211	38.8204	1.95868	14.7079	0.747802	0.532947	0.149959	0	0	6.43339	0.258952	3.46282	0.454548	0	0	0.526094	0.188611	0	0	0	0
Sol 789	1019	44.527	2.34883	0	0	0.6513	0.276081	21.902	0.7866	15.0109	1.0261	1.4397	0.427253	0	0	7.4489	0.421759	3.1001	0.567482	0.0102373	0.0237053	0.204701	0.137258	0	0	0	0
Sol 789	1020	56.514	2.04794	0	0	0.208597	0.164096	8.52616	0.30503	9.78839	0.500801	0.449363	0.146689	0.0669504	0.0771541	6.99755	0.27559	1.60255	0.441877	0.0130617	0.0286354	0.0920714	0.107495	0	0	0.0063987	0.0173751
Sol 789	1021	70.3596	2.52667	0	0	0.0596902	0.0878521	6.62723	0.236407	4.5048	0.37626	0.112081	0.0908904	0.0167036	0.038643	4.31438	0.522742	0.774115	0.191148	0	0	0.0627018	0.077423	0	0	0	0
Sol 789	1022	68.9509	2.46669	0	0	0.144058	0.134238	5.94222	0.217082	3.19461	0.452847	0.127022	0.0999766	0.0400506	0.0541625	2.8717	0.590226	1.03809	0.239881	0	0	0.0580709	0.0518818	0	0	0	0
Sol 789	1023	45.6418	1.64702	0	0	0.645347	0.189646	19.4858	0.695913	9.08721	0.495097	0.249223	0.209369	0.0523476	0.0637129	5.81216	0.22963	2.16002	0.375512	0	0	0.30282	0.161845	0	0	0	0
Sol 789	1024	37.6179	1.9219	1.41787	1.17098	0.841139	0.225571	18.0431	0.9057	11.6498	0.588715	0.2933	0.2279	0.0524465	0.0641388	6.0983	0.3376	2.1994	0.5384	0	0	0.2495	0.2153	0	0	0	0
Sol 789	1025	19.4692	1.02346	1.17759	1.36352	0.896754	0.239722	33.546	1.19032	13.903	0.7087	0.429952	0.148524	0	0	4.81936	0.422468	2.96436	0.607259	0	0	0.302913	0.241028	0	0	0	0
Sol 789	1026	20.8228	0.836189	1.07329	1.03472	1.18511	0.294285	35.5502	1.80034	15.3064	0.792877	0.632663	0.18898	0.090421	0.095891	5.99072	0.333175	3.12798	0.499428	0	0	0.567012	0.186011	0	0	0	0
Sol 789	1027	21.7325	0.858698	3.06167	1.5135	1.23704	0.300482	34.3371	1.24534	16.2384	0.824394	0.518923	0.172958	0.111441	0.10635	5.64714	0.308437	3.21425	0.397003	0	0	0.553573	0.180819	0	0	0.0042613	0.0144073
Sol 789	1028	24.3816	0.963981	1.73671	1.3597	1.16067	0.288957	33.5069	1.23553	16.925	0.852046	0.979016	0.233165	0.0541613	0.0659369	6.30276	0.331396	2.52481	0.343223	0	0	0.473751	0.163653	0	0	0	0
Sol 789	1029	37.2163	1.35806	0.1756	0.848851	1.07833	0.270366	27.2516	0.969742	15.3907	0.737649	0.417404	0.24153	0	0	4.50024	0.28577	1.88778	0.352884	0	0	0.574209	0.144757	0	0	0	0
Sol 789	1030	42.2952	2.1552	0.503986	0.793974	0.853947	0.228178	17.7034	0.8886	10.9805	0.7894	0.2987	0.2289	0	0	3.7597	0.5195	2.13398	0.376188	0	0	0.2632	0.2199	0	0	0	0
Sol 789	1031	34.5848	1.26699	2.15333	1.29451	0.823425	0.224466	29.634	1.05505	14.8062	0.718975	0.511937	0.155575	0.115511	0.098517	6.1881	0.24487	2.47414	0.388156	0	0	0.399176	0.148945	0	0	0	0
Sol 789	1032	24.1052	0.91097	1.49208	0.986404	0.794883	0.219278	34.3152	1.22738	15.6535	0.776401	0.480084	0.149761	0.041128	0.053745	7.39284	0.291288	2.07055	0.364353	0	0	0.472044	0.143086	0	0	0	0
Sol 789	1033	24.371	0.927772	0.825844	1.00567	0.900793	0.24182	35.5455	1.27099	18.9985	0.904802	0.424407	0.200451	0	0	7.8038	0.307561	2.1764	0.380066	0	0	0.475857	0.156745	0	0	0	0
Sol 789	1034	51.5905	1.94354	1.0553	1.1254	0.432699	0.182707	14.0781	0.534693	9.67621	0.522331	0.276985	0.161113	0.0706629	0.0811771	8.78643	0.349176	1.66842	0.336142	0	0	0.178387	0.124236	0	0	0	0
Sol 789	1035	56.9287	2.13352	0	0	0.394945	0.177791	11.36	0.443925	8.3296	0.4597	0.256669	0.148129	0.0232384	0.0396984	6.67435	0.270343	1.53026	0.31725	0	0	0.130229	0.10287	0	0	0.0194796	0.033141
Sol 789	1036	44.4617	1.61712	2.75888	1.27229	0.548805	0.170921	24.29	0.868326	12.0374	0.615493	0.219321	0.208719	0	0	7.34229	0.287639	2.23231	0.57044	0	0	0.253912	0.149737	0	0	0	0
Sol 789	1037	60.2152	3.0515	0	0	0.560902	0.206004	20.0237	1.0046	7.96411	0.480338	0.200621	0.139389	0.0242505	0.043903	5.3402	0.2982	2.3244	0.5488	0	0	0.2486	0.215	0	0	0	0
Sol 789	1038	69.025	2.46836	0	0	0.240832	0.17003	4.61686	0.417186	4.60443	0.356215	0.178561	0.127163	0.0182595	0.0383199	4.53969	0.447939	0.901377	0.215068	0	0	0.0781425	0.0670033	0	0	0	0
Sol 789	1039	54.2742	2.85846	0.0645413	0.688242	0.785626	0.213955	9.65593	0.343695	10.8752	0.53757	0.33	0.232147	0	0	5.1196	0.202561	2.33425	0.389134	0.0359281	0.0420065	0.102586	0.084686	0	0	0	0
Sol 789	1040	37.8721	1.37498	0.16895	0.825619	1.27519	0.301028	19.2348	0.682815	15.9052	0.737496	2.62093	0.397814	0.00084949	0.0223866	7.63811	0.423909	3.25757	0.39521	0.0280652	0.0365048	0.186849	0.130779	0	0	0.0170534	0.0316778
Sol 789	1041	17.4084	0.653408	1.18198	1.13598	1.03135	0.267375	41.6205	1.47578	13.9448	0.716071	1.3067	0.282779	0	0	7.20939	0.284412	3.82666	0.360102	0	0	0.587042	0.147848	0	0	0	0
Sol 789	1042	17.5508	0.923285	0.45179	0.947835	0.502751	0.192357	34.1113	1.21258	15.6534	1.07221	0.299771	0.219833	0	0	3.59506	0.492269	1.79177	0.477653	0	0	0.505916	0.134731	0	0	0	0
Sol 789	1043	29.6244	1.09193	0.932873	1.13137	0.41472	0.171503	25.1513	1.27259	22.3161	0.985018	0.178586	0.126286	0	0	2.83245	0.391972	0.777263	0.27512	0	0	0.283598	0.211236	0	0	0	0
Sol 789	1044	26.5119	1.031	0.794038	1.13782	0.538172	0.188845	25.5928	0.920291	17.641	0.846751	0.305746	0.134981	0.00491494	0.0251213	3.86127	0.323739	1.54241	0.312596	0	0	0.271715	0.152556	0	0	0	0
Sol 789	1045	21.0883	0.787467	0.690393	1.03924	0.890037	0.239517	40.4235	1.43884	10.9959	0.876335	0.477912	0.155602	0	0	4.78395	0.291138	3.54379	0.369655	0	0	0.487064	0.153012	0	0	0	0
Sol 789	1046	27.0938	0.991869	0.613067	1.01975	0.972229	0.256647	38.338	1.36012	14.6919	0.733185	0.440553	0.146199	0	0	4.21997	0.316211	3.94091	0.346788	0	0	0.459238	0.142563	0	0	0	0
Sol 789	1047	29.4372	1.52225	2.22938	1.41882	1.05144	0.26718	32.1531	1.14365	15.2673	0.744304	0.391956	0.157182	0.113239	0.103812	4.86974	0.249493	3.57501	0.3744	0	0	0.342847	0.250618	0	0	0	0
Sol 789	1048	34.5317	1.77138	0.0966609	1.15231	0.844585	0.229702	19.735	0.700616	14.9467	0.705669	0.87552	0.294745	0.0551851	0.061411	5.08672	0.28491	3.16042	0.398094	0.0928088	0.111034	0.184791	0.129678	0	0	0	0
Sol 789	1049	39.0007	2.25836	0.801025	0.873619	0.89014	0.236072	17.9419	1.02495	14.8392	0.699355	0.305204	0.162162	0.0377965	0.0503453	3.177	0.572222	3.22729	0.396298	0.122146	0.0980021	0.115	0.130638	0	0	0	0
Sol 789	1050	28.456	1.06486	0	0	0.944837	0.253006	38.0009	1.91797	13.3022	0.707255	0.49693	0.179822	0	0	5.13954	0.332127	3.57712	0.384788	0	0	0.318637	0.217944	0	0	0	0
Sol 789	1051	16.8966	0.920405	0	0	0.406228	0.281271	30.1828	1.10984	13.9394	0.721826	0.471393	0.156873	0	0	3.88491	0.590469	2.47464	0.370541	0	0	0.296275	0.146854	0	0	0	0
Sol 789	1052	27.0585	1.0592	1.3464	0.952015	1.08897	0.274287	25.2295	0.909559	15.2621	0.749362	0.597343	0.151364	0.119229	0.10771	6.76947	0.267845	2.86843	0.396037	0.0208384	0.034114	0.1736	0.125313	0.0729856	0.0680226	0	0
Sol 789	1053	25.7975	0.991231	0.811715	1.05172	0.861504	0.237054	33.4032	1.19266	13.1941	0.693101	0.591878	0.14999	0.0324012	0.0477231	7.98699	0.313813	3.47356	0.380636	0.019319	0.0334154	0.288264	0.159657	0.0430808	0.0486512	0	0
Sol 789	1054	28.7188	1.10861	1.68714	1.10712	0.895898	0.242699	27.7634	1.00306	14.685	0.741818	0.495068	0.161713	0	0	9.12841	0.359074	3.41255	0.386337	0.0409248	0.0476753	0.253267	0.154198	0	0	0	0
Sol 789	1055	26.1408	0.955829	0.28909	0.95099	1.15978	0.28462	27.0928	0.960958	16.0432	0.763577	0.541292	0.138101	0.140506	0.112843	10.1782	0.391825	2.97835	0.400989	0	0	0.302181	0.161649	0	0	0	0
Sol 789	1056	25.5342	1.3236	1.20385	1.08566	1.2414	0.424	37.3066	1.8695	18.4715	1.2217	0.6776	0.2374	0.0418351	0.0559182	6.71656	0.26666	2.4801	0.5591	0	0	0.5181	0.187	0	0	0	0
Sol 789	1057	21.5766	0.805311	2.09668	1.45112	1.68787	0.357448	39.5485	1.4087	16.7694	0.816709	0.674361	0.167614	0.0587118	0.0702186	4.82532	0.280989	2.50179	0.394837	0	0	0.633501	0.163474	0	0	0	0
Sol 789	1058	23.2314	1.21115	0	0	0.822351	0.229578	35.7704	1.29574	14.251	0.725329	0.367972	0.166007	0	0	5.87842	0.23397	3.08313	0.402351	0	0	0.404561	0.154232	0	0	0	0
Sol 789	1059	27.0677	1.4108	1.01149	1.06667	0.445189	0.189425	39.8745	1.43702	15.8491	0.783142	0.438692	0.154599	0	0	8.17973	0.327678	3.46309	0.391951	0.00814016	0.0224364	0.482625	0.153897	0	0	0	0
Sol 789	1060	26.1038	1.35276	0.692981	1.00408	1.30295	0.321088	35.9222	1.40405	15.2543	0.828922	0.741529	0.221457	0.0996351	0.103736	12.1391	0.522087	3.53255	0.370563	0.0872118	0.0913995	0.526478	0.179852	0	0	0	0
Sol 789	1061	26.6166	1.376	3.488	2.124	1.28138	0.317507	34.6882	1.7385	17.6721	1.1732	0.9924	0.3254	0.1722	0.1828	17.3271	0.9314	3.5569	0.5378	0.0119	0.0369	0.5609	0.2006	0	0	0	0
Sol 789	1062	22.1077	0.861416	2.02778	1.11681	1.10573	0.282056	26.4546	1.37456	14.4054	0.747815	0.852437	0.210605	0.0593379	0.0726116	13.4962	0.749732	2.84621	0.40916	0.00203245	0.0125156	0.327404	0.158244	0.04161	0.0638215	0	0
Sol 789	1063	28.4611	1.47841	2.63759	1.59298	1.0002	0.263405	37.8408	1.37749	14.5173	0.757705	0.495898	0.169091	0	0	6.27069	0.33838	3.1985	0.409108	0	0	0.44295	0.157689	0	0	0	0
Sol 789	1064	23.7753	0.877281	1.8416	1.47461	0.920438	0.245615	40.3749	1.43195	18.7336	0.878455	0.393963	0.158887	0.0153927	0.0377598	3.75521	0.367628	2.77518	0.401825	0	0	0.583997	0.147207	0	0	0	0
Sol 789	1065	16.6633	0.625899	0	0	0.896086	0.240526	41.7249	1.4792	16.6537	0.816155	0.367485	0.162829	0	0	4.58677	0.273865	2.59688	0.527251	0	0	0.425665	0.207406	0	0	0	0
Sol 789	1066	32.5775	1.69083	1.8691	1.86305	0.889286	0.239881	30.297	1.5355	12.7426	0.65688	0.232697	0.147108	0.0505764	0.0627474	5.28841	0.305924	2.84816	0.501554	0	0	0.2008	0.193406	0.3932	0.226301	0.2937	0.228204
Sol 789	1067	43.3202	2.33945	0	0	0.8123	0.313991	14.2554	0.506604	12.872	0.624536	0.262834	0.153064	0.0467771	0.0594211	6.32316	0.248272	2.52883	0.396234	0	0	0.107247	0.0876454	0.0379129	0.0426398	0.374153	0.158304
Sol 789	1068	38.6622	1.39758	1.36925	1.26024	0.892946	0.237606	23.5076	1.19036	14.418	0.696297	0.320997	0.23142	0.0174496	0.0373512	6.20891	0.346334	2.19957	0.538894	0	0	0.213268	0.199857	0	0	0	0
Sol 789	1069	46.1348	1.70492	1.26792	0.924429	0.743411	0.210773	19.7958	0.703369	10.5925	0.564875	0.337224	0.164336	0.0227835	0.0402454	5.22195	0.267969	2.64972	0.634997	0	0	0.21979	0.143339	0	0	0	0
Sol 789	1070	60.6029	2.31386	2.47188	1.10549	0.724789	0.233746	11.8706	0.454325	9.87029	0.539754	0.175758	0.128375	0	0	5.5801	0.314198	1.4542	0.43273	0	0	0.125994	0.102867	0	0	0.00203912	0.00987365
Sol 789	1071	53.4578	1.98214	0.507137	0.73057	0.804257	0.219888	7.8327	0.296809	8.62349	0.466979	0.176821	0.126637	0.0305751	0.0444732	6.25676	0.247556	1.66998	0.332083	0.022448	0.0357428	0.128776	0.13902	0.0221844	0.0497677	0	0
Sol 789	1072	51.9314	1.91933	1.11558	1.02312	0.746679	0.210014	7.61615	0.314329	8.35973	0.474006	0.210899	0.141408	0	0	6.65702	0.269616	1.49486	0.312503	0.0119069	0.0249202	0.0710808	0.062127	0.0411	0.0650001	0.00439996	0.013814
Sol 789	1073	55.5577	2.03899	1.18936	1.08706	0.652495	0.202273	11.3365	0.429466	10.3482	0.54343	0.65111	0.186573	0	0	11.0274	0.44193	1.45058	0.306169	0.00164821	0.0105074	0.167331	0.121596	0.418792	0.149828	0.0221921	0.0341622
Sol 789	1074	39.1712	1.42211	2.2181	0.607375	0.991798	0.234565	15.824	0.567617	15.0308	0.582632	0.838178	0.284789	0.104242	0.0881217	23.215	0.879271	1.18686	0.263557	0.0370908	0.0429384	0.21161	0.140388	7.32705	0.260718	1.08121	0.245138
Sol 789	1075	27.8976	1.03299	3.01905	1.30429	0.699438	0.202896	24.1691	0.859245	15.7446	0.746609	1.24968	0.272809	0.0146125	0.038383	29.2339	1.10636	1.38393	0.296019	0	0	0.0136746	0.0267329	0.992065	0.22941	0.062719	0.0646561
Sol 789	1076	23.6266	0.866047	3.16895	1.38875	0.775535	0.217117	27.6397	0.98217	15.4545	0.740694	0.32249	0.163515	0	0	33.1884	1.25205	1.67395	0.333818	0	0	0.0460003	0.0462453	0	0	0	0
Sol 789	1077	16.8311	0.627047	1.47522	0.969262	1.04979	0.264324	21.3502	0.76097	17.811	0.8174	0.150835	0.113668	0.0237218	0.0394864	32.499	1.23514	1.50493	0.312948	0	0	0.0666103	0.062415	0.758467	0.184336	0	0
Sol 789	1078	26.9259	1.36995	1.4408	0.604418	1.43988	0.307686	29.041	1.03425	19.6193	0.754504	0.4735	0.196022	0.12985	0.102095	12.8272	0.490932	1.79865	0.346782	0.00293143	0.00929972	0.506	0.182327	2.9604	0.564213	0.2503	0.215302
Sol 789	1079	28.0124	1.0312	0.700629	0.912546	0.945686	0.248625	34.9396	1.24403	19.9919	0.909453	0.600065	0.151187	0	0	7.86817	0.30735	2.09032	0.372906	0	0	0.573053	0.168028	0	0	0	0
Sol 789	1080	38.8578	1.40528	0	0	1.97891	0.385493	24.6592	0.875738	17.6927	0.806602	0.348417	0.164352	0.0465126	0.0589226	4.92629	0.214695	2.79129	0.400792	0.0376411	0.0446713	0.260709	0.154303	0.0436208	0.0467119	0.0297237	0.0389944
Sol 789	1081	36.2524	1.8551	0	0	4.03642	0.366483	18.0302	0.9051	14.666	0.693452	0.2619	0.2203	0	0	3.8842	0.5039	2.6982	0.5673	0.299446	0.162415	0.108515	0.0887854	0.214616	0.140399	0.336342	0.159106
Sol 789	1082	22.0761	1.18653	2.81474	1.3888	2.35523	0.412853	35.2885	1.25148	17.6948	0.832575	0.4086	0.223264	0.0483557	0.0550062	4.1743	0.462656	2.5721	0.396976	0.0374352	0.0435847	0.458078	0.148534	0	0	0	0
Sol 789	1083	19.2502	0.716987	0.221733	0.961679	1.43192	0.325859	39.1483	1.38894	15.6027	0.773424	0.570327	0.202372	0.059272	0.0706802	4.65025	0.497397	2.60682	0.397791	0	0	0.507044	0.13999	0	0	0	0
Sol 789	1084	19.3075	0.737741	1.41525	1.32185	1.15138	0.28396	36.4317	1.31606	19.838	0.931998	1.00411	0.233785	0	0	5.18632	0.29509	1.71841	0.340117	0	0	0.688075	0.186693	0	0	0	0
Sol 789	1085	22.6529	0.846508	0.532406	0.946717	1.39119	0.317517	31.7307	1.12604	16.0763	0.770826	0.82812	0.198918	0.128552	0.106315	8.78703	0.346751	2.56911	0.39569	0	0	0.462583	0.14238	0	0	0	0
Sol 789	1086	25.8787	0.96828	2.24087	1.43652	1.51767	0.337289	37.7064	1.33883	14.7785	0.734582	0.540029	0.156059	0.0782422	0.0855426	8.51373	0.333943	3.38297	0.387341	0.00239018	0.0118534	0.368586	0.16187	0	0	0	0
Sol 789	1087	30.608	1.12557	2.26144	1.36571	1.26977	0.301698	28.187	1.00586	14.6227	0.713923	0.990873	0.229818	0	0	6.92849	0.271574	3.74267	0.364651	0	0	0.1902	0.131694	0.257718	0.218541	0.00584368	0.017531
Sol 789	1088	23.9454	1.24528	1.12147	1.00983	1.06958	0.271656	30.0995	1.06825	15.64	0.752869	0.77095	0.187292	0	0	9.15213	0.353236	3.34204	0.391685	0	0	0.391399	0.160433	0	0	0	0
Sol 789	1089	24.0864	1.3456	0	0	1.67509	0.356516	41.4639	2.24646	16.3907	0.79638	0.4835	0.192525	0.077669	0.0854795	6.18587	0.243988	3.492	0.547252	0	0	0.47712	0.150569	0	0	0	0
Sol 789	1090	34.0917	1.7491	1.75531	1.31187	2.45377	0.419607	27.8646	1.3971	16.6942	1.1058	0.3025	0.2297	0.0284203	0.0418814	4.9805	0.2847	3.096	0.5662	0.0298005	0.0419184	0.232338	0.148192	0.099032	0.0823385	0.1003	0.118
Sol 789	1091	33.6745	1.22591	1.75825	1.36929	2.91947	0.418742	32.1784	1.14268	15.2632	0.738492	0.352192	0.162376	0.0194691	0.0401864	4.70159	0.251154	3.14674	0.396891	0.01297	0.0289332	0.322428	0.162966	0.0293637	0.0590241	0.0757164	0.0661599
Sol 789	1092	33.5882	1.21858	0.226783	0.793767	4.27137	0.347754	23.3203	0.827186	15.2208	0.720515	0.283641	0.159558	0.0624437	0.0729348	4.26082	0.313974	2.55372	0.396637	0.37078	0.163383	0.21111	0.140443	0	0	0.348774	0.162589
Sol 789	1093	45.7257	1.64751	0	0	3.15055	0.42355	17.8236	0.901712	15.7639	0.730149	0.17305	0.177403	0	0	3.57489	0.549349	2.96471	0.575789	0.284907	0.160342	0.0742023	0.0649289	0.120463	0.0959868	0.340088	0.233776
Sol 789	1094	38.0793	1.444	1.33853	0.963673	1.59494	0.345733	23.6426	0.873916	16.6203	0.800212	0.406824	0.148089	0	0	5.62744	0.345963	2.95129	0.404981	0.0528476	0.0574071	0.234499	0.142016	0.0051398	0.01357	0.0136483	0.0296145
Sol 789	1095	23.6562	0.954611	0.79066	1.37051	1.25305	0.308389	32.6605	1.64653	19.5734	0.947441	0.512188	0.174611	0	0	12.1511	0.505192	2.00094	0.376706	0	0	0.426141	0.152854	0	0	0	0
Sol 789	1096	14.5007	0.556529	2.28031	1.3542	0.785404	0.217348	22.0963	0.799488	18.2828	0.877826	0.223298	0.144745	0	0	29.0594	1.12117	1.62229	0.327607	0	0	0.166258	0.118514	0	0	0.0104279	0.0242349
Sol 789	1097	21.0448	0.777124	4.30609	1.38283	0.679135	0.197742	25.2697	0.900436	16.8903	0.794979	0.318722	0.162733	0	0	32.9904	1.25193	1.59534	0.324264	0	0	0.0353458	0.04084	0	0	0	0
Sol 789	1098	30.4229	1.11603	0.997668	1.25335	0.629131	0.188154	26.8942	0.961319	15.3862	0.738526	0.703235	0.173993	0	0	29.6823	1.12749	1.56291	0.320265	0	0	0.0605478	0.0539323	0	0	0	0
Sol 789	1099	33.4486	1.22001	0.37745	0.794259	0.789521	0.217796	17.3781	0.630907	15.1101	0.709408	1.31789	0.284092	0.0192563	0.0391645	22.3194	0.856105	1.61401	0.326583	0	0	0.149546	0.112732	0.211951	0.139398	0	0
Sol 789	1100	41.3021	1.49102	0.907069	1.15227	0.562106	0.178472	20.0616	0.71415	14.3787	0.686787	1.17	0.3689	0	0	14.8313	0.565716	1.54739	0.317826	0	0	0.3859	0.2277	0.1872	0.1851	0	0
Sol 789	1101	56.3821	2.06087	0.202899	0.684239	0.691316	0.19666	8.9692	0.457381	9.57458	0.49687	0.256131	0.15229	0.014551	0.0366015	8.65073	0.336281	1.32434	0.286771	0	0	0.190055	0.132028	0.433061	0.206503	0	0
Sol 789	1102	61.2671	2.48401	0	0	0.462859	0.18452	6.00318	0.351819	6.39686	0.449427	0.178089	0.126661	0.020058	0.039921	4.68779	0.348418	1.41191	0.303131	0.0118188	0.0268709	0.0539691	0.0580297	0.137978	0.109602	0	0
Sol 789	1103	37.3032	1.9062	0.540732	0.751096	1.13954	0.278129	15.4859	0.7779	12.1325	0.602267	1.51056	0.311288	0	0	6.7584	0.3726	2.70043	0.400602	0.0089	0.0302	0.1211	0.136	0	0	0	0
Sol 789	1104	37.5032	1.3572	1.54317	1.35021	0.812168	0.225295	30.9183	1.09616	11.8122	0.615036	0.619978	0.155508	0.0205882	0.0401769	6.55128	0.255831	2.76119	0.401756	0	0	0.311876	0.161486	0	0	0	0
Sol 789	1105	52.7517	1.8936	0.929818	0.817194	0.714393	0.202642	14.369	0.510951	10.2598	0.527792	0.262417	0.155065	0	0	6.93727	0.273501	1.9913	0.5161	0	0	0.118046	0.0947644	0.0331	0.0619	0	0
Sol 789	1106	62.5	2.23829	0.178501	0.73277	0.361647	0.179928	12.7946	0.45637	8.86415	0.470993	0.152157	0.161133	0	0	5.78074	0.228345	1.5784	0.321472	0.000646627	0.00880408	0.108945	0.0884143	0.125874	0.140116	0	0
Sol 789	1107	53.6798	1.95851	1.37596	1.07975	0.683843	0.197692	12.9151	0.473799	10.88	0.549019	0.153016	0.114181	0.038661	0.0529961	5.24199	0.268903	1.97464	0.359252	0	0	0.0546015	0.0501238	1.7287	0.336478	0.136396	0.105891
Sol 789	1108	34.8729	1.29457	0.424337	0.857762	1.01127	0.260467	23.4904	0.849807	14.0201	0.687082	0.433985	0.178513	0	0	6.40938	0.252855	2.4074	0.392293	0	0	0.394053	0.14318	0.474647	0.187405	0	0
Sol 789	1109	21.4569	1.14955	0.899683	0.987651	0.795466	0.22018	34.1721	1.21163	13.9572	0.704584	1.5676	0.451209	0.134438	0.108839	4.7216	0.246109	3.01022	0.401607	0	0	0.535549	0.160154	0	0	0	0
Sol 789	1110	21.6514	0.814555	0	0	0.96581	0.255874	46.1783	2.34955	14.1444	0.729662	1.11	0.354836	0	0	4.81728	0.311888	3.58652	0.383293	0	0	0.5458	0.19606	0	0	0	0
Sol 789	1111	18.0214	0.683505	0	0	1.26319	0.302314	42.1714	2.12901	11.9508	0.655429	0.799297	0.195426	0.0577467	0.0613344	7.93829	0.316784	3.59518	0.376761	0	0	0.556223	0.149727	0.0732401	0.0649162	0	0
Sol 789	1112	23.5424	1.24242	1.99532	1.36314	1.33781	0.329576	41.5441	2.11486	15.3387	0.863472	1.0175	0.331927	0.2131	0.206009	12.2443	0.671712	4.6051	0.369137	0	0	0.6217	0.219871	0	0	0	0
Sol 789	1113	19.2639	0.769879	4.9312	1.68145	1.12947	0.285134	44.2965	1.6282	13.4701	0.745008	0.469092	0.161528	0.0808717	0.0870165	5.42528	0.351805	4.18529	0.32526	0	0	0.551221	0.169014	0	0	0	0
Sol 789	1114	24.824	0.917548	0.632375	1.02656	0.858629	0.237214	39.7212	2.21355	15.0293	0.757865	0.355	0.232261	0	0	5.1938	0.31662	3.36081	0.399396	0	0	0.424719	0.155493	0	0	0	0
Sol 789	1115	29.2444	1.60926	0.638748	1.29585	0.956455	0.252019	24.7154	1.32891	15.5878	0.745316	0.319806	0.163708	0.0125103	0.0343666	5.51406	0.217135	3.58421	0.538377	0	0	0.209737	0.197888	0	0	0	0
Sol 789	1116	23.0928	0.860958	0.876838	1.07435	1.19742	0.293158	42.3557	1.502	16.6224	0.809544	0.347018	0.220256	0	0	4.51737	0.282465	3.45429	0.387548	0	0	0.467743	0.141555	0	0	0	0
Sol 789	1117	21.0525	0.796023	2.31648	1.54541	1.30396	0.310167	38.694	1.4207	13.5451	0.707851	0.495586	0.166818	0.0273822	0.0420916	4.85115	0.319978	3.27972	0.383992	0.00862678	0.022586	0.393392	0.156246	0	0	0	0
Sol 789	1118	19.5732	0.726005	0	0	1.17126	0.28631	32.8198	1.65958	14.0814	0.710411	0.616344	0.155015	0.136213	0.110269	8.18898	0.318234	3.02081	0.530155	0	0	0.371623	0.162623	0	0	0	0
Sol 789	1119	27.4542	1.03796	2.97979	1.51364	1.42911	0.324481	36.6358	1.31161	14.8526	0.758524	0.466888	0.14797	0.0652487	0.0760008	7.13419	0.282149	3.69852	0.344523	0	0	0.378142	0.1587	0.0234395	0.0344494	0.0278732	0.0362067
Sol 789	1120	33.7685	1.23742	1.52644	1.2671	1.46423	0.328846	24.6014	0.875095	14.6242	0.7137	0.881332	0.293537	0.0672035	0.0708923	9.42668	0.514037	2.7106	0.401494	0	0	0.136022	0.105799	2.79687	0.400478	0.255954	0.15417
Sol 789	1121	29.4274	1.07602	2.24853	1.34414	1.15627	0.283188	24.7316	0.877257	14.4011	0.703976	1.75733	0.472968	0.0576145	0.069289	10.3031	0.395989	2.9915	0.401705	0.0418412	0.0651084	0.209018	0.139639	0.122003	0.136671	0	0
Sol 789	1122	30.5419	1.12111	0	0	1.31969	0.30736	24.904	0.884313	13.5337	0.671014	0.511602	0.184955	0.0376431	0.0508584	5.54393	0.30837	2.79407	0.402359	0.0287654	0.03719	0.206606	0.137825	0.00446726	0.0173727	0	0
Sol 789	1123	35.1391	1.91022	2.59122	1.4213	1.19412	0.293608	34.7303	1.8498	13.406	0.693258	0.468413	0.155428	0	0	6.1904	0.24797	3.04285	0.406431	0.0184847	0.0341739	0.4148	0.221027	0	0	0	0
Sol 789	1124	40.0323	1.44528	0.4395	1.6481	0.661387	0.193936	19.5756	0.694881	13.482	0.653111	0.248362	0.152283	0	0	3.9754	0.4912	3.1602	0.5636	0.0558	0.0725	0.19976	0.136164	0	0	0	0
Sol 789	1125	32.7845	1.6824	0	0	0.665846	0.198178	24.1809	1.2129	15.0912	1.0161	0.2663	0.2215	0.030105	0.0444743	4.1803	0.4586	3.5588	0.5371	0.0942	0.1126	0.2289	0.2072	0	0	0	0
Sol 789	1126	23.8231	0.886883	1.35794	1.08363	0.709455	0.23254	32.0418	1.63459	15.0612	0.74609	0.331605	0.213211	0.23382	0.152492	5.10169	0.287786	3.4514	0.476365	0	0	0.412022	0.192249	0	0	0	0
Sol 789	1127	15.0844	0.570956	0	0	0.896961	0.24486	37.7793	1.94029	13.3147	0.697808	0.578453	0.204433	0.312963	0.164789	5.01083	0.223984	3.74846	0.417034	0	0	0.54039	0.19213	0	0	0	0
Sol 789	1128	15.3086	0.738885	0.99488	1.03476	0.871757	0.259797	19.5146	1.01086	11.0821	0.697032	0.383904	0.138499	0.0542083	0.0681034	4.45452	0.35766	2.48372	0.385328	0	0	0.267606	0.162401	0	0	0	0
Sol 789	1129	10.1809	1.96914	0	0	0.622873	0.275326	10.7013	1.92073	5.289	1.80082	0.303977	0.108687	0.0910136	0.0928582	2.31823	0.819149	2.19975	0.287181	0.01715	0.0333497	0.144766	0.110042	0	0	0	0
Sol 789	1130	28.7787	1.52414	0.467814	1.27675	0.97202	0.321461	17.6392	0.779192	14.0284	1.03738	0.349626	0.124601	0.037583	0.0537907	4.2998	0.340599	2.53366	0.332268	0.0220172	0.0366935	0.119531	0.111495	0	0	0	0
Sol 789	1131	28.496	1.08429	0.377292	0.909187	0.586324	0.211009	24.6138	0.912508	13.1427	0.71051	0.273868	0.256593	0	0	4.02864	0.725957	1.80645	0.541156	0	0	0.302241	0.140612	0	0	0	0
Sol 789	1132	20.5874	0.773249	0	0	0.993573	0.258431	46.48	2.35473	15.6777	0.800433	0.744301	0.192219	0	0	6.25405	0.249812	3.296	0.559253	0	0	0.644857	0.167703	0	0	0	0
Sol 789	1133	20.2806	1.07613	0.677323	1.09499	1.25458	0.302388	47.0858	2.39413	16.7953	0.82164	0.7485	0.258482	0	0	4.94767	0.270691	3.8866	0.430699	0	0	0.547011	0.141288	0	0	0	0
Sol 789	1134	30.1733	1.09971	1.36027	1.08855	0.623472	0.1926	37.2045	1.31898	13.5268	0.686647	0.357065	0.163845	0.0318241	0.0453632	3.95483	0.349349	4.47024	0.279825	0	0	0.333575	0.163849	0	0	0	0
Sol 789	1135	62.7542	2.25094	0.313491	0.66939	0.274233	0.164492	8.54798	0.30593	5.55221	0.344319	0.148197	0.11205	0.00596322	0.0258072	3.98197	0.339375	1.84211	0.351557	0	0	0.102463	0.0841223	0	0	0	0
Sol 789	1136	52.819	1.94143	0.780625	0.782792	0.520419	0.180207	14.3484	0.520828	6.1883	0.417161	0.172573	0.124898	0.0582846	0.0613575	3.8936	0.373873	2.36079	0.502698	0	0	0.170394	0.166673	0	0	0	0
Sol 789	1137	24.8211	0.91504	0.483777	1.04514	1.09795	0.275674	36.2746	1.85012	15.6723	0.769574	0.352237	0.214939	0	0	6.18502	0.242019	3.76261	0.344963	0	0	0.350087	0.214752	0	0	0	0
Sol 789	1138	42.0332	2.26587	1.02417	0.818051	0.73735	0.206597	13.359	0.476331	11.9865	0.587616	0.2297	0.207953	0.0631031	0.0636108	4.96027	0.205642	2.6744	0.568753	0.0432513	0.0476626	0.112755	0.0909181	0	0	0	0
Sol 789	1139	49.7018	2.5258	0.137145	0.770992	0.67627	0.213176	18.4049	0.9237	11.6681	0.586625	0.2057	0.1962	0	0	6.63485	0.262173	3.08818	0.401687	0.00498023	0.0165669	0.218124	0.142213	0	0	0	0
Sol 789	1140	37.6279	1.36647	0	0	0.500735	0.184559	31.8965	1.14149	12.6505	0.643847	0.267904	0.154128	0.0133595	0.0362761	6.96644	0.272133	2.71361	0.395521	0	0	0.392403	0.160074	0	0	0	0
Sol 789	1141	46.6158	2.44523	0	0	0.510374	0.191313	20.1405	0.761275	9.89437	0.528923	0.202268	0.126051	0.0561001	0.0630029	7.38824	0.289766	2.06875	0.353554	0	0	0.274236	0.154813	0	0	0	0
Sol 789	1142	42.9208	1.54709	0.707117	0.832659	0.362509	0.184469	22.8979	0.830229	10.0967	0.536677	0.236724	0.141966	0.00950145	0.0319645	5.91727	0.232813	2.62511	0.390221	0	0	0.347334	0.163099	0	0	0	0
Sol 789	1143	36.0398	1.86999	0.445385	1.26744	0.604794	0.189754	30.4662	1.09998	13.3601	0.677205	0.331775	0.153269	0	0	3.68786	0.373086	2.67967	0.395664	0	0	0.405102	0.15827	0	0	0	0
Sol 789	1144	22.8953	0.841953	2.19006	1.34963	0.624318	0.187228	29.0262	1.04112	14.362	0.981751	0.229573	0.219164	0	0	5.67386	0.223846	2.1004	0.562751	0	0	0.343697	0.207252	0	0	0	0
Sol 789	1145	25.9463	1.34339	1.74408	1.25287	0.373862	0.186254	23.1756	0.822323	12.2168	0.87878	0.264656	0.221909	0	0	5.14118	0.286976	1.56848	0.454018	0	0	0.230524	0.207016	0	0	0	0
Sol 789	1146	23.6007	0.865869	1.94964	1.2594	0.837624	0.226237	20.4906	0.734169	11.3748	0.839392	0.372694	0.162796	0.0390327	0.0513348	6.62309	0.258617	1.61107	0.454564	0	0	0.235601	0.211399	0	0	0	0
Sol 789	1147	16.7183	0.636093	0.767909	1.07172	0.901482	0.242966	34.2543	1.23378	12.7743	0.677894	0.416084	0.150383	0	0	6.09988	0.242323	3.30991	0.377864	0	0	0.477344	0.14962	0	0	0	0
Sol 789	1148	16.4079	0.61393	2.16582	1.61416	0.939593	0.24803	43.0241	1.52543	14.5324	0.737805	0.372274	0.1579	0	0	4.31618	0.302278	4.71561	0.239492	0	0	0.479151	0.148354	0	0	0	0
Sol 789	1149	25.4766	1.3197	0	0	0.778954	0.22314	38.2785	1.9184	14.7521	0.73254	0.3231	0.2319	0.0279638	0.0471361	5.1384	0.2869	4.9206	0.2871	0	0	0.4448	0.2102	0	0	0	0
Sol 789	1150	24.4993	0.900028	0.0937228	1.08331	0.679355	0.204129	41.8461	2.13338	15.3329	0.759804	0.379751	0.161826	0	0	6.87068	0.267628	4.21651	0.396453	0	0	0.490531	0.132681	0	0	0	0
Sol 789	1151	65.2986	3.65499	0	0	0.384028	0.175593	10.502	0.585045	7.01731	0.407684	0.1664	0.172046	0.0483373	0.0618553	5.3248	0.323689	2.5723	0.56656	0	0	0.1181	0.13333	0	0	0	0
Sol 789	1152	71.1901	3.67611	0.0743872	0.602931	0.0553165	0.0830008	2.81013	0.397963	3.34946	0.441942	0.0474984	0.0474889	0	0	4.50184	0.279843	0.807558	0.196762	0	0	0.00459456	0.0128847	0.00814144	0.0201788	0.00737739	0.0190417
Sol 789	1153	44.7135	2.52012	0.604103	0.882272	0.36185	0.190399	31.0399	1.72569	7.89614	0.494709	0.240906	0.149338	0.0335082	0.0471323	3.99248	0.365782	3.6891	0.531547	0	0	0.3543	0.231657	0	0	0	0
Sol 789	1154	27.1978	1.04512	0	0	0.891975	0.253418	33.2901	1.70906	14.3031	0.727913	0.405181	0.16362	0.0376616	0.0528115	4.40736	0.250968	3.71929	0.348168	0	0	0.355725	0.184699	0	0	0	0
Sol 789	1155	35.0079	1.27248	0.11149	0.883335	0.807899	0.222442	25.0455	1.26604	12.5911	0.885049	1.38713	0.410172	0.0561476	0.0628326	6.79998	0.376508	2.89827	0.542811	0	0	0.313794	0.160602	0	0	0	0
Sol 789	1156	52.6327	1.92099	0	0	0.804776	0.222453	16.8121	0.636425	11.4333	0.595556	0.471672	0.160424	0.00617594	0.0280215	5.74553	0.30714	2.35331	0.376273	0	0	0.165944	0.120821	0	0	0	0
Sol 789	1157	29.1836	1.17487	0.465328	0.890297	0.810632	0.257099	37.5603	1.89986	15.2944	0.836438	0.44129	0.155863	0.020098	0.0414596	4.27443	0.339658	2.72214	0.772584	0	0	0.439439	0.157555	0	0	0	0
Sol 789	1158	4.3137	0.452149	1.51718	1.1809	0.972114	0.321864	38.619	1.93832	17.1433	1.16095	0.418869	0.146754	0.0934647	0.100682	3.90385	0.307423	3.01146	0.313866	0	0	0.416089	0.154199	0	0	0	0
Sol 789	1159	27.1673	4.19303	0.822532	1.29932	1.00754	0.912343	21.0617	1.13348	16.9541	3.62917	0.359109	0.171237	0.10018	0.116182	5.91749	0.344999	3.37158	0.37491	0.0429008	0.0564295	0.208097	0.176565	0	0	0	0
Sol 789	1160	20.282	0.969124	1.12475	1.55244	0.85032	0.276935	31.9969	1.6189	14.711	0.893077	0.634881	0.221665	0.526569	0.180112	5.3896	0.397997	3.54965	0.360459	0	0	0.481697	0.173447	0	0	0	0
Sol 789	1161	16.4484	0.615952	2.53987	1.50665	0.863476	0.233472	35.7419	1.27723	12.2118	0.655602	0.568889	0.167207	0.470503	0.165721	4.65085	0.276736	3.72209	0.369445	0.0421369	0.0629733	0.550267	0.147462	0	0	0	0
Sol 789	1162	12.6589	0.712527	0	0	0.702265	0.209611	51.2608	1.81725	14.4748	0.748708	0.540566	0.14204	0	0	5.27463	0.207942	4.81589	0.223431	0	0	0.632669	0.157862	0	0	0	0
Sol 789	1163	22.9835	0.845181	4.10875	2.20899	1.07563	0.272371	37.7949	1.34095	15.006	0.741952	0.414797	0.155907	0	0	6.22355	0.24358	3.27026	0.571853	0	0	0.505431	0.148912	0	0	0	0
Sol 789	1164	25.3641	1.0068	0	0	1.0545	0.278898	36.2785	1.37163	15.5674	0.849529	0.542471	0.182242	0.186551	0.125245	7.80634	0.322359	2.7011	0.68055	0	0	0.50792	0.171557	0	0	0	0
Sol 789	1165	24.9613	0.947638	0.135443	0.827897	1.11872	0.279937	31.8101	1.16366	13.5568	0.706521	0.422301	0.15495	0.0973076	0.0873158	5.86386	0.327233	3.01072	0.365943	0.00199962	0.0116077	0.338906	0.151891	0	0	0	0
Sol 789	1166	30.542	1.11253	0.302709	0.859581	1.26419	0.300468	24.5026	0.869119	14.4785	0.700584	0.991217	0.322469	0.0543521	0.0661324	6.96818	0.386698	2.88331	0.402396	0.0281538	0.0424995	0.24886	0.151809	0.0259276	0.0376992	0	0
Sol 789	1167	33.963	1.76688	1.6706	0.605023	1.4239	0.30404	23.2092	1.1996	16.999	0.657895	1.3253	0.284394	0.1152	0.0949662	8.74965	0.330417	2.7085	0.565185	0.1287	0.100677	0.2543	0.152625	2.7728	0.56435	0.48215	0.138354
Sol 789	1168	33.6117	1.23932	0	0	1.28825	0.305213	31.589	1.12403	16.5674	0.792745	0.400413	0.14557	0.0347353	0.0476358	6.07103	0.238096	3.20119	0.399713	0.00591497	0.0184906	0.280191	0.159433	0.520653	0.187487	0.0125943	0.0281992
Sol 789	1169	20.7992	0.7743	3.93912	1.51131	1.4896	0.33258	36.5467	1.29747	13.5531	0.696054	0.567448	0.157516	0.0438197	0.0566327	6.04662	0.334762	3.41588	0.580353	0	0	0.41555	0.155768	0	0	0	0
Sol 789	1170	16.1447	0.623442	2.06514	1.67623	1.35942	0.320486	44.7079	2.25838	11.3171	0.642761	0.519081	0.16535	0.0668974	0.0771627	5.41289	0.289607	3.44942	0.421273	0	0	0.476473	0.15405	0	0	0	0
Sol 789	1171	15.5784	0.593933	0.684542	1.11049	0.962715	0.253998	45.0321	1.59674	14.2668	0.735425	0.416895	0.147455	0.0212006	0.0396017	4.88959	0.227648	3.89822	0.440074	0	0	0.571081	0.156364	0	0	0	0
Sol 789	1172	20.0204	0.74156	1.04067	1.185	0.987427	0.262167	40.8765	1.45418	14.9206	0.750048	0.456487	0.145262	0.0632939	0.0737512	7.58624	0.294574	4.14241	0.317069	0	0	0.502031	0.138515	0	0	0	0
Sol 789	1173	28.9374	1.06803	1.29084	1.02033	0.640041	0.203008	33.7993	1.22232	12.8206	0.675961	0.535684	0.163004	0.108458	0.0941783	7.65389	0.303645	3.60004	0.684905	0	0	0.37308	0.140444	0	0	0	0
Sol 789	1174	25.7741	1.36615	3.24923	1.61853	1.07809	0.275838	43.2126	2.21685	16.3537	0.804669	0.461995	0.157795	0	0	4.44532	0.299848	4.08737	0.337419	0	0	0.477566	0.14927	0	0	0	0
Sol 789	1175	22.1212	0.82421	1.3722	1.53894	1.09122	0.277319	41.6964	1.48435	15.0678	0.761033	0.517685	0.164201	0.0109691	0.0332597	5.48951	0.256051	3.55156	0.374393	0	0	0.474379	0.147445	0	0	0	0
Sol 789	1176	25.9054	1.3421	1.21373	1.49976	1.19796	0.29486	42.6276	2.1359	14.7531	1.0466	0.7614	0.2622	0.065679	0.073314	7.4529	0.4092	3.4799	0.5443	0	0	0.5038	0.1825	0	0	0	0
Sol 789	1177	29.8427	1.12201	2.2293	1.09859	0.996408	0.265525	31.6364	1.1688	15.5895	0.772199	3.6565	0.52477	0.0112631	0.0362402	5.86439	0.310858	3.03662	0.40091	0	0	0.403719	0.150005	0	0	0	0
Sol 789	1178	37.0799	1.34121	0.284351	0.776443	1.1129	0.273482	16.0072	0.568903	14.7974	0.695445	7.37779	0.378327	0.00849435	0.0311293	4.35203	0.401329	2.17817	0.529009	0	0	0.194436	0.133931	0.148519	0.112158	0.0660137	0.0835298
Sol 789	1179	45.6676	1.65528	0.0139583	0.724735	0.82151	0.222643	16.7161	0.596326	12.9886	0.632797	3.1535	0.600743	0	0	6.4058	0.250774	1.84758	0.351837	0	0	0.24002	0.149718	0.0472305	0.046757	0.0583316	0.0633401
Sol 789	1180	46.6485	2.431	0.57315	0.858668	0.778796	0.215619	23.6366	0.838693	13.3375	0.938294	0.366009	0.159932	0	0	4.7551	0.344546	1.55616	0.318112	0	0	0.365764	0.159609	1.517	0.440614	0	0
Sol 789	1181	53.7931	2.82417	0	0	0.472962	0.171934	21.4325	0.760379	12.5641	0.621504	0.2014	0.194019	0	0	4.2653	0.447516	1.3475	0.411091	0	0	0.291504	0.158923	0.924295	0.216777	0.00109813	0.00843565
Sol 789	1182	64.0284	2.29374	0.298868	0.745143	0.46787	0.170227	14.5917	0.518372	9.81363	0.509608	0.178106	0.177624	0	0	5.36031	0.211866	1.48613	0.309611	0	0	0.182311	0.128581	0.12397	0.138685	0	0
Sol 789	1183	47.3532	1.71625	0.155142	0.780395	0.565923	0.206032	18.5899	0.665946	10.9802	0.565007	0.312386	0.163054	0.00388436	0.0249496	6.33456	0.250231	2.32667	0.388969	0.00595263	0.0179081	0.119568	0.0959889	0.0372787	0.0456621	0	0
Sol 789	1184	42.9019	1.54693	0.953917	1.13534	0.815031	0.221665	16.6338	0.590804	12.0934	0.599917	1.0218	0.331389	0.0369435	0.051818	8.41154	0.325303	2.54841	0.395737	0.00264942	0.0118974	0.101198	0.0833706	0	0	0	0
Sol 789	1185	54.521	2.04109	0.77875	0.763787	0.904276	0.236876	9.6611	0.491028	9.99874	0.513425	0.543647	0.155445	0.0119369	0.0344685	6.66882	0.26245	2.26509	0.385376	0	0	0.0919014	0.0769847	0.0996904	0.0926673	0	0
Sol 789	1186	60.334	2.46402	0.0148835	0.585845	0.45418	0.176571	5.19988	0.729821	7.67147	0.535392	0.262372	0.131997	0.0257467	0.0401055	7.75152	0.384089	0.889522	0.217256	0	0	0.131566	0.105959	0.0101825	0.0240682	0.0349314	0.0433258
Sol 789	1187	32.6372	1.22602	0.586286	0.888338	1.39625	0.318586	18.7876	0.672114	14.1771	0.7196	1.90464	0.356764	0.0559378	0.0685643	16.3175	0.64458	1.25626	0.277746	0	0	0.404686	0.156898	0.00668236	0.0214229	0.00722397	0.0246186
Sol 789	1188	26.606	0.973024	1.09202	0.940886	1.36384	0.31527	30.9869	1.10012	16.9156	0.796674	2.5499	0.396042	0	0	17.5684	0.667494	1.60394	0.32512	0	0	0.722341	0.176921	0	0	0	0
Sol 789	1189	24.8574	0.918015	0.544084	0.86424	0.660101	0.194933	24.7599	0.900381	17.0316	0.790173	2.20321	0.378889	0	0	29.2195	1.11686	1.38853	0.296943	0	0	0.203083	0.137532	0	0	0	0
Sol 789	1190	34.3862	1.24548	0.587806	1.14094	0.930143	0.243894	17.48	0.620597	16.1456	0.746021	0.858904	0.204925	0	0	24.5315	0.929528	1.37978	0.295465	0	0	0.189099	0.131406	0	0	0	0
Sol 789	1191	27.3991	0.999629	0.385134	0.926284	0.850792	0.231429	27.9053	0.989573	17.3971	0.809676	0.334459	0.163842	0.0153935	0.0379339	18.9129	1.02443	1.95722	0.362741	0	0	0.282167	0.158959	0	0	0	0
Sol 789	1192	23.9698	0.908839	2.34521	1.32017	1.43244	0.325233	29.0073	1.03787	17.5012	0.839546	0.416232	0.152929	0	0	16.2736	0.636229	2.14585	0.377493	0	0	0.371342	0.148992	0	0	0	0
Sol 789	1193	34.0432	1.41445	0.595215	0.939927	2.04276	0.388055	19.5436	0.781011	15.0252	0.818971	0.416733	0.153655	0	0	7.78119	0.379826	2.86898	0.384723	0.0882019	0.0865855	0.142804	0.112245	0	0	0.211481	0.14301
Sol 789	1194	33.8019	1.34864	1.13169	0.802161	2.56571	0.409699	14.7861	0.576085	13.5507	0.742788	0.474222	0.162171	0.0876729	0.0917152	4.91255	0.73783	2.58012	0.363811	0.297674	0.145447	0.0598115	0.0675371	0.406443	0.160218	0.890239	0.211703
Sol 789	1195	27.2101	1.01588	1.07118	1.29599	2.25145	0.40163	30.4359	1.09103	17.9333	0.860721	0.460838	0.154756	0	0	5.45476	0.294792	2.57079	0.377508	0	0	0.277837	0.157468	0	0	0.159015	0.117472
Sol 789	1196	26.7851	0.980066	0.61394	0.984434	1.84073	0.374521	38.4594	1.36316	14.4511	0.725332	0.375116	0.162206	0.137047	0.111215	4.67612	0.254437	3.37651	0.38663	0.00740228	0.0210146	0.377737	0.159876	0	0	0	0
Sol 789	1197	28.7011	1.05748	0.505309	0.956563	1.60092	0.346435	31.2383	1.10787	15.1821	0.73952	0.322425	0.164211	0.0786305	0.0794677	5.76838	0.227067	4.45811	0.283999	0.0183901	0.0333823	0.268459	0.157069	0.00165531	0.00797559	0.0747775	0.0687222
Sol 789	1198	18.2632	0.697598	1.08259	1.12215	1.11016	0.279789	45.5369	1.6169	13.6108	0.726924	0.376	0.23006	0.00986106	0.0329035	5.89487	0.238481	3.95232	0.343354	0	0	0.557544	0.141455	0	0	0	0
Sol 789	1199	16.8066	0.637199	1.54475	1.5731	0.754227	0.301601	44.4021	2.42167	13.2926	0.704442	0.580064	0.147352	0.0166722	0.0372825	6.41594	0.25427	3.9241	0.501084	0	0	0.538435	0.147306	0	0	0	0
Sol 789	1200	15.3476	0.589139	1.51071	1.20353	1.29248	0.311378	51.3362	2.63245	13.6887	0.728677	0.833257	0.200707	0	0	5.65471	0.224544	3.9626	0.396553	0	0	0.653555	0.227065	0	0	0	0
Sol 789	1201	15.9346	0.597593	2.5282	1.60724	0.988328	0.260347	44.1164	1.56324	13.982	0.720903	0.620783	0.220907	0.0528868	0.0644022	5.26691	0.293804	3.82854	0.48252	0	0	0.635599	0.158494	0	0	0	0
Sol 789	1202	15.2194	0.601967	2.17224	1.67939	1.00008	0.267018	44.0387	2.26158	14.8015	0.783354	0.473252	0.171198	0.0458028	0.0599186	5.21424	0.315352	3.727	0.403104	0	0	0.660633	0.22786	0	0	0	0
Sol 789	1203	18.4407	0.770457	0.756588	1.4708	0.78186	0.250467	39.2165	1.48282	16.9495	0.893414	0.449587	0.161957	0	0	4.64905	0.352808	3.2672	0.444016	0	0	0.475739	0.166003	0	0	0	0
Sol 789	1204	25.8373	0.950846	0.439923	0.931752	0.898967	0.241234	37.3605	1.32484	16.2053	0.785344	0.376357	0.161225	0.0796014	0.0746677	5.85275	0.230267	3.30865	0.392246	0	0	0.374883	0.162227	0	0	0	0
Sol 789	1205	26.7006	1.40243	0	0	1.3958	0.458295	37.8421	1.37063	17.3917	1.18295	0.442552	0.156063	0.208307	0.14451	5.04257	0.295967	3.2536	0.498149	0	0	0.426793	0.152504	0	0	0	0
Sol 789	1206	31.5343	1.64263	1.61131	1.01231	2.4142	0.405336	30.3572	1.54217	17.7833	0.836645	0.5647	0.202854	0.0608433	0.0725522	5.20919	0.290232	2.49389	0.523158	0.0502701	0.0596709	0.2686	0.221711	0	0	0	0
Sol 789	1207	32.8424	1.20777	1.37809	1.14597	3.00205	0.420658	15.1151	0.541519	13.7399	0.662043	0.523636	0.149085	0.0134707	0.034403	6.70796	0.379907	2.48032	0.389849	0.373555	0.155369	0.0662569	0.05853	0.339186	0.163581	0.608866	0.152896
Sol 789	1208	38.7654	1.41814	3.28192	1.36538	2.83295	0.428725	25.8392	0.92452	16.2599	0.775209	0.333663	0.159596	0.0488826	0.0612169	5.62297	0.26183	3.03816	0.397233	0.143808	0.11013	0.174001	0.122472	0.332031	0.226968	0.510073	0.138231
Sol 789	1209	29.3611	1.09763	1.99485	1.3604	2.03369	0.393025	28.9778	1.04716	16.2863	0.788853	0.690009	0.172438	0.130474	0.107322	9.17003	0.361514	3.14143	0.394331	0	0	0.382389	0.145384	0	0	0	0
Sol 789	1210	27.0522	0.989613	0	0	1.14403	0.282597	38.8753	1.37813	14.2262	0.712436	0.515834	0.135298	0.173781	0.129511	6.94496	0.270707	3.13457	0.593661	0	0	0.538608	0.140358	0	0	0	0
Sol 789	1211	38.045	1.9449	1.8405	0.931396	1.0514	0.266216	22.7095	1.1391	14.3926	0.9824	1.1653	0.3677	0.0291	0.0738	11.1628	0.6053	2.4448	0.5567	0	0	0.5654	0.2019	0	0	0	0
Sol 789	1212	27.1969	0.993143	1.66947	0.991916	0.751625	0.215417	33.2261	1.17779	15.2981	0.743875	4.1848	0.4482	0	0	12.7714	0.487973	1.64759	0.329957	0	0	0.926214	0.217209	0	0	0	0
Sol 789	1213	23.3932	1.21423	1.90788	1.29483	1.24563	0.296303	27.2517	0.966632	15.9878	0.758185	3.02898	0.399445	0.00454774	0.0250375	15.4175	0.830601	1.74096	0.340742	0	0	0.54215	0.137639	0	0	0	0
Sol 789	1214	32.2756	1.21447	1.61723	0.913483	4.08056	0.372213	15.5075	0.572175	12.6976	0.646848	3.89485	0.356242	0.0144015	0.0392127	13.2378	0.528141	1.26685	0.278425	0	0	0.183864	0.126427	0	0	0.388833	0.163114
Sol 789	1215	57.4364	2.30684	1.06296	1.16037	1.34483	0.319431	16.8393	0.699128	11.7689	0.696832	0.97048	0.312243	0.0340534	0.0507337	9.06674	0.441538	1.32377	0.29531	0	0	0.338316	0.129363	0	0	0.0107593	0.0315228
Sol 789	1216	59.9844	2.21752	0	0	0.814396	0.221457	10.0883	0.361391	10.2117	0.517425	0.137669	0.145052	0.0178605	0.0383948	5.89059	0.238155	2.0399	0.370536	0	0	0.1375	0.106114	0	0	0	0
Sol 789	1217	40.3837	1.46357	0.580516	1.08171	1.16809	0.281629	12.3708	0.445406	12.5219	0.608134	0.337057	0.158536	0.0946121	0.0849734	9.40346	0.36519	2.93331	0.400194	0.0750663	0.0681042	0.07513	0.066313	0.0706234	0.0614588	0	0
Sol 789	1218	33.9658	1.23765	0.321553	0.8003	0.85981	0.230998	16.3775	0.829564	11.52	0.586475	0.382473	0.147954	0	0	9.22081	0.360333	2.56768	0.400048	0	0	0.0558432	0.0502266	0.320922	0.151846	0	0
Sol 789	1219	53.3876	2.73224	1.12495	1.13562	1.05059	0.266269	16.8117	0.622202	11.8601	0.601052	0.193372	0.134552	0.0134785	0.0371825	6.28632	0.293854	2.50923	0.50557	0	0	0.148289	0.112909	0.00481225	0.0140228	0	0
Sol 789	1220	56.0865	2.8465	0.4216	1.6416	0.930073	0.245912	22.9359	1.1504	11.1751	0.572179	0.3453	0.2323	0.0029	0.0233	5.3899	0.3009	2.588	0.5636	0	0	0.3351	0.2318	0	0	0	0
Sol 789	1221	39.6277	1.46495	3.91936	1.41935	0.791875	0.22123	26.5522	0.958517	12.9151	0.657707	0.436542	0.150106	0	0	14.7811	0.570162	2.39921	0.387671	0	0	0.4813	0.157911	0	0	0	0
Sol 789	1222	45.6461	1.67615	0.136908	0.874783	0.898025	0.240101	28.7963	1.04121	12.0261	0.61723	0.936678	0.220803	0	0	14.0755	0.541943	1.97768	0.365121	0	0	0.481871	0.15838	0	0	0.0112919	0.0259573
Sol 789	1223	40.1455	1.45922	0.811295	1.12375	1.1345	0.278084	16.1493	0.579637	15.0097	0.706812	6.19625	0.226283	0	0	8.31137	0.322708	2.04306	0.369848	0.121014	0.0972873	0.161628	0.119158	0.0829025	0.0707998	0.184738	0.129885
Sol 789	1224	34.8625	1.30382	0.147019	0.818201	1.13075	0.280785	16.1635	0.617376	14.4927	0.701812	5.93597	0.241192	0.0247125	0.0419962	6.92862	0.275367	2.13018	0.376617	0	0	0.162865	0.120492	0.111048	0.0935901	0.146767	0.112556
Sol 789	1225	31.1237	1.63984	0.24075	0.874054	1.00957	0.259535	18.4385	0.675167	13.4868	0.672063	1.16318	0.263032	0.045159	0.0589715	7.0164	0.393996	2.25841	0.386333	0.0113525	0.0272464	0.210435	0.185594	0	0	0	0
Sol 789	1226	31.4878	1.14473	0.59273	0.840766	0.887776	0.236216	17.8509	0.636896	14.5514	0.692817	0.502232	0.143299	0.0217847	0.0468399	8.61667	0.333128	2.39209	0.387766	0.0199739	0.0344374	0.203739	0.137475	0	0	0	0
Sol 789	1227	27.1507	1.41291	0.872964	1.02217	0.63199	0.19221	31.281	1.11769	14.7782	0.732971	0.487811	0.154652	0	0	7.10086	0.282409	3.35856	0.388765	0	0	0.430191	0.148716	0	0	0	0
Sol 789	1228	51.3834	2.6097	0.593338	0.828863	0.394001	0.187254	17.3649	0.8718	8.8924	0.6891	0.3148	0.2311	0.036545	0.0500452	6.1451	0.3408	2.9927	0.5686	0	0	0.1877	0.1854	0	0	0	0
Sol 789	1229	43.5405	2.51241	0.805759	1.18509	0.631326	0.18684	19.7121	0.704249	8.83289	0.495982	0.361442	0.162678	0.1044	0.0932057	7.8172	0.304534	2.89567	0.404619	0	0	0.26557	0.156456	0	0	0	0
Sol 789	1230	30.3836	1.11108	0	0	0.838872	0.232444	31.4887	1.62432	14.3359	1.0123	0.3373	0.232436	0	0	5.6811	0.323454	3.808	0.511796	0	0	0.493275	0.164166	0	0	0	0
Sol 789	1231	28.3257	1.03487	1.28013	0.980069	0.914789	0.242313	31.9073	1.13118	14.2383	0.707905	0.357109	0.1639	0	0	4.52085	0.278585	3.02798	0.400446	0	0	0.438878	0.148281	0	0	0	0
Sol 789	1232	22.8255	0.903508	0.0647109	0.950519	0.784941	0.221629	30.6358	1.13683	11.6245	0.652157	0.334686	0.153076	0.0715803	0.0756435	4.04517	0.348015	2.92978	0.395243	0	0	0.32075	0.160546	0	0	0	0
Sol 789	1233	30.198	1.2014	0.519381	0.96647	1.10583	0.280051	33.4967	1.23651	12.3947	0.69474	0.341108	0.120526	0.0547079	0.0671261	3.20002	0.398436	3.31241	0.379642	0	0	0.339734	0.148907	0	0	0	0
Sol 789	1234	33.7894	1.31347	0.195062	0.893674	1.34836	0.313255	31.1759	1.1467	14.6427	0.751504	0.229714	0.140385	0.0279636	0.0425559	3.74898	0.368395	3.33291	0.376664	0.00958203	0.024589	0.342364	0.157925	0	0	0	0
Sol 789	1235	23.5704	0.890072	1.53751	1.09039	1.01249	0.263664	33.8455	1.72179	14.6247	0.74489	0.352675	0.16192	0.172816	0.125124	5.18309	0.290999	3.29856	0.397458	0	0	0.443714	0.153286	0	0	0	0
Sol 789	1236	13.1614	0.520349	0	0	0.945815	0.274947	36.9661	1.34792	13.2298	0.752666	0.496359	0.179684	1.07351	0.267495	5.28379	0.25305	1.69919	0.498835	0	0	0.445747	0.154131	0	0	0	0
Sol 789	1237	15.3694	0.631354	0.502928	2.7985	0.950979	0.251706	30.5639	1.12313	11.5726	0.687966	0.423764	0.153429	1.02804	0.363421	5.66782	0.266524	1.83253	0.549345	0	0	0.368064	0.140139	0	0	0	0
Sol 789	1238	16.4421	0.87653	1.91273	2.04843	0.740118	0.297844	33.0138	1.17335	13.2409	0.680703	0.44966	0.146189	0.461519	0.188516	6.94826	0.272348	2.05755	0.499859	0	0	0.568171	0.149647	0	0	0	0
Sol 789	1239	11.9647	0.456489	3.15125	1.09807	0.873514	0.233827	35.2154	1.2487	12.0711	0.646523	0.547683	0.139763	1.07826	0.249162	4.78726	0.234847	2.36836	0.558723	0	0	0.510813	0.131093	0	0	0	0
Sol 789	1240	15.1982	0.579885	0.27423	0.962239	0.915507	0.242446	36.5718	1.32428	10.4947	0.611818	0.354957	0.257003	0.505731	0.170924	3.69349	0.365848	3.04594	0.657249	0	0	0.317564	0.250896	0	0	0	0
Sol 789	1241	19.3496	0.780654	0.479885	0.965998	0.697167	0.233979	37.0763	1.3625	14.5775	0.799925	0.439913	0.153841	0	0	3.35588	0.357672	2.78996	0.381045	0	0	0.437539	0.155716	0	0	0	0
Sol 789	1242	18.5626	0.726663	1.75403	1.39168	0.383595	0.159244	38.3373	1.38448	11.5312	0.926508	0.38401	0.142652	0	0	2.67608	0.613485	2.0104	0.348159	0	0	0.505969	0.147535	0.0465204	0.0550072	0	0
Sol 789	1243	26.8741	1.03661	1.16945	1.39308	0.548138	0.205391	37.8606	1.40004	13.7725	0.76087	0.42424	0.150495	0.117105	0.107878	4.52027	0.337934	2.33571	0.362604	0	0	0.546508	0.165681	0.0261939	0.0334351	0	0
Sol 789	1244	38.1316	1.39012	0	0	0.876436	0.240431	37.2094	1.32733	16.4448	0.811626	0.380341	0.1365	0	0	3.85179	0.347376	2.3713	0.608402	0	0	0.546685	0.162899	0	0	0	0
Sol 789	1245	64.879	2.324	0	0	0.429607	0.179386	20.8349	0.739922	11.061	0.558452	0.0907703	0.107893	0	0	4.0118	0.455841	2.0275	0.512451	0	0	0.259404	0.154816	0	0	0	0
Sol 789	1246	55.4959	2.0183	0.0519836	0.795017	0.486351	0.185116	20.6977	0.751796	10.1223	0.532512	0.160819	0.11801	0	0	3.7326	0.364208	2.55857	0.395779	0	0	0.154088	0.168554	0	0	0	0
Sol 789	1247	39.2245	2.24895	0	0	0.366148	0.165998	12.1217	0.442372	5.50009	0.625721	0.175628	0.125937	0.0527751	0.0647737	3.28533	0.677235	2.05866	0.368418	0	0	0.105397	0.125211	0	0	0	0
Sol 789	1248	49.2759	1.78135	0	0	0.118192	0.121583	3.75471	0.368805	1.79659	0.511268	0.0604094	0.0747062	0	0	1.91724	0.470234	0.622575	0.218129	0	0	0.028069	0.0530001	0.00221337	0.00724377	0	0
Sol 789	1249	80.4793	2.90694	0.133833	0.579076	0.00469684	0.0531143	1.5163	0.44069	3.58325	0.431309	0.0146025	0.0277122	0.00738183	0.0267343	4.42691	0.291712	0.546589	0.144752	0.00279948	0.010598	0	0	0	0	0.000548222	0.00583108
Sol 789	1250	70.1988	3.56217	0	0	0.21951	0.165247	5.04725	0.18049	8.16485	0.428852	0.0563338	0.0511897	0.0291381	0.0452508	4.74056	0.243263	1.58917	0.456363	0.0438494	0.047022	0.0295496	0.0414	0.0087	0.0197369	0.0172166	0.0306269
Sol 789	1251	31.6611	1.15149	0.837428	0.986042	0.730897	0.210511	34.125	1.21245	14.3532	0.708018	0.260796	0.15459	0	0	4.93816	0.216412	4.40812	0.288599	0	0	0.419714	0.153374	0	0	0	0
Sol 789	1252	14.9863	0.596915	2.42721	1.64664	0.830174	0.231547	43.1145	1.54093	14.2581	0.750657	0.350671	0.166834	0.0641436	0.0749872	4.95624	0.253302	4.84727	0.242395	0	0	0.41024	0.163116	0.0521421	0.0604323	0	0
Sol 789	1253	12.9565	0.70248	0	0	0.788135	0.22375	45.6625	1.6198	13.4719	0.709207	0.317371	0.162368	0	0	4.69879	0.256954	4.62026	0.261503	0	0	0.620373	0.156475	0	0	0	0
Sol 789	1254	10.7717	0.418384	2.1798	1.18431	0.823348	0.231619	48.6277	1.72294	13.8934	0.731017	0.372303	0.160746	0	0	6.17052	0.241928	3.89669	0.348887	0	0	0.658797	0.16369	0	0	0	0
Sol 789	1255	22.1958	0.855035	0.637593	0.925546	0.480845	0.200182	33.8718	1.26611	22.3831	1.02699	0.296343	0.140004	0	0	5.09266	0.340795	2.05803	0.373535	0	0	0.571788	0.186012	0	0	0	0
Sol 789	1256	24.1423	0.903683	0	0	0.473609	0.180432	29.6047	1.05155	18.5197	1.23588	0.23324	0.141599	0	0	3.7374	0.364485	1.56609	0.319347	0	0	0.331347	0.239002	0	0	0	0
Sol 789	1257	17.1006	0.640819	1.24618	1.40694	0.862869	0.234181	31.9595	1.64289	20.0466	0.924989	0.300478	0.213865	0	0	5.13588	0.291056	2.47028	0.52282	0	0	0.552506	0.200127	0	0	0	0
Sol 789	1258	17.0991	0.903794	0.528179	0.980331	0.963978	0.252297	36.1364	1.28069	18.7087	0.87247	0.380738	0.222441	0.0281971	0.0409459	6.3231	0.246911	2.88061	0.551676	0	0	0.511696	0.185442	0	0	0	0
Sol 789	1259	17.5901	0.943812	0.684502	0.934451	0.564668	0.18368	35.4931	1.26526	19.5286	0.911605	0.360879	0.161078	0	0	5.30913	0.219624	2.6493	0.398894	0	0	0.41725	0.225259	0	0	0	0
Sol 789	1260	26.1597	0.983659	0.297079	0.895844	0.284747	0.186699	28.1836	1.01974	25.2029	1.12343	0.196873	0.124983	0.00197814	0.021265	3.41879	0.361899	1.2553	0.274226	0	0	0.298415	0.255577	0	0	0	0
Sol 789	1261	21.4637	0.811418	0	0	0.57608	0.206457	22.7204	1.16264	20.7654	0.957951	0.15919	0.175669	0	0	3.16877	0.682085	1.58144	0.484074	0	0	0.232653	0.227014	0	0	0	0
Sol 789	1262	14.4663	0.554017	1.26787	1.49062	0.501484	0.185412	39.8204	1.42568	16.1616	0.801095	0.34293	0.151594	0	0	4.61118	0.311962	3.39075	0.389676	0	0	0.41114	0.27006	0	0	0	0
Sol 789	1263	14.6021	0.55156	1.93745	1.57727	0.911733	0.242506	45.7885	1.62585	13.0584	0.69196	0.349521	0.159853	0	0	4.23352	0.316528	4.2994	0.303348	0	0	0.500878	0.18134	0	0	0	0
Sol 789	1264	33.8869	1.2362	1.68605	1.37356	0.771959	0.218923	27.7583	0.986695	14.2286	0.703238	0.160507	0.118831	0	0	3.21278	0.400092	4.01981	0.338759	0	0	0.314775	0.163512	0	0	0	0
Sol 789	1265	52.4773	1.88492	0.882857	1.01579	0.634125	0.190398	8.14752	0.290547	14.044	0.64577	0.0312562	0.0434263	0	0	2.79817	0.403483	3.05364	0.399995	0.220965	0.143907	0.0294119	0.0411413	0.0193097	0.0323833	0.0485751	0.0494754
Sol 789	1266	68.9519	2.46623	0	0	0.318322	0.182852	3.75167	0.478644	8.30459	0.431586	0.0293847	0.0352575	0.0199918	0.0379346	3.02587	0.403473	1.87482	0.490474	0.0957799	0.0804291	0	0	0.00140117	0.00680715	0.0189336	0.0322486
Sol 789	1267	68.5549	2.49311	0	0	0.059365	0.0919573	10.7944	0.39051	7.46364	0.418237	0.0886539	0.108857	0	0	2.53271	0.394074	0.976423	0.229079	0	0	0.110614	0.0900402	0	0	0	0
Sol 789	1268	33.7605	1.78166	0.240176	0.810555	0.246256	0.155085	21.4115	0.759902	9.97966	0.532194	0.376426	0.161502	0	0	3.08011	0.562576	2.65051	0.398015	0	0	0.2349	0.147973	0	0	0	0
Sol 789	1269	26.9256	1.01834	0	0	0.400124	0.193926	40.4452	1.45574	11.9558	0.670814	0.495754	0.159307	0.0273732	0.0414925	4.06624	0.324498	3.99358	0.344615	0	0	0.446052	0.15425	0	0	0	0
Sol 789	1270	57.9626	2.1204	1.45872	0.934554	0.800079	0.225017	22.3438	0.831658	11.0474	0.578904	0.296376	0.157458	0.0381014	0.0519818	4.11968	0.332236	2.83243	0.404923	0.00616569	0.0185999	0.261196	0.145498	0	0	0	0
Sol 789	1271	59.9079	2.14827	0.167153	1.54509	0.58126	0.204536	23.943	1.20814	13.0689	0.645111	0.0218546	0.0515929	0	0	2.73631	0.569023	2.04345	0.521441	0	0	0.236309	0.210068	0.25269	0.216406	0	0
Sol 789	1272	41.2455	2.11004	0	0	0.838028	0.273645	34.5513	1.43972	13.1005	0.843887	0.40222	0.136826	0.11513	0.110701	5.15132	0.38902	2.57792	0.374022	0	0	0.436521	0.15596	0.449779	0.160788	0	0
Sol 789	1273	23.3923	0.877627	0.960651	0.948095	0.476828	0.179283	31.3363	1.60245	9.52219	0.825496	0.420747	0.150347	0	0	3.12191	0.691805	1.4383	0.455484	0	0	0.42127	0.284599	0	0	0	0
Sol 789	1274	18.2184	0.746034	0	0	0.837948	0.232538	40.5228	2.05737	18.6033	0.929155	0.462477	0.167728	0.0368202	0.0509533	2.81259	0.38542	1.98731	0.365159	0	0	0.599079	0.209664	0	0	0	0
Sol 789	1275	20.284	0.850631	1.47671	1.11702	0.878286	0.273967	37.3026	1.43103	14.8759	0.991147	0.432473	0.155251	0.54792	0.184876	3.51039	0.361098	2.27458	0.374133	0	0	0.671658	0.210854	0	0	0	0
Sol 789	1276	14.5109	0.648087	0	0	0.916452	0.283413	36.1559	1.36482	12.5182	0.86193	0.608127	0.197458	2.19198	0.381583	5.09904	0.375026	1.49911	0.314054	0	0	0.46531	0.16377	0	0	0	0
Sol 789	1277	19.6628	0.870804	0	0	1.03303	0.297831	19.2581	0.809892	10.6674	0.743362	0.603089	0.196011	1.26961	0.295009	6.1056	0.40485	1.34534	0.469157	0	0	0.138084	0.111488	0.0322267	0.0404836	0	0
Sol 789	1278	15.3442	0.945169	3.00478	5.14804	0.867338	0.332256	23.1041	1.07861	9.41742	1.2311	0.375394	0.129706	0.545448	0.575482	3.53834	0.298039	1.42598	0.677034	0	0	0.238872	0.117664	0	0	0	0
Sol 789	1279	4.90116	0.684616	0	0	0.851065	0.298915	25.0259	1.13398	9.73642	1.00296	0.39504	0.134669	0.167263	0.191382	3.62564	0.289	0.639722	0.37528	0	0	0.38344	0.131284	0	0	0	0
Sol 789	1280	15.056	0.732352	1.1202	1.05892	0.634746	0.22589	30.4599	1.2187	10.0634	0.716619	0.39968	0.142027	0.178382	0.123004	4.08178	0.336001	2.25358	0.372585	0	0	0.337685	0.140322	0	0	0	0
Sol 789	1281	16.2742	0.700909	0	0	0.500086	0.197022	27.5703	1.13055	9.83346	0.629476	0.432174	0.147846	0.0645053	0.0767049	3.907	0.324027	2.41795	0.378247	0	0	0.365015	0.130212	0.0133357	0.0290117	0	0
Sol 789	1282	19.6305	0.97572	0	0	0.868321	0.298542	28.3895	1.32373	10.6814	0.891608	0.22219	0.133081	0.0197415	0.0454681	3.2083	0.296546	2.59151	0.354016	0	0	0.302046	0.130381	0.0147387	0.0317872	0	0
Sol 789	1283	16.5063	0.946124	1.10487	1.36514	0.895059	0.316399	6.97251	0.654287	7.93312	1.16131	0.0321446	0.0759067	0.0417649	0.0558067	2.46987	0.316406	1.93973	0.329898	0	0	0.213983	0.11051	0	0	0	0
Sol 789	1284	19.163	0.843404	0.490262	0.915255	1.14034	0.316249	28.7091	1.21322	13.3331	0.766387	0.328259	0.115867	0	0	3.48592	0.368252	2.27789	0.380626	0	0	0.279661	0.154869	0	0	0	0
Sol 789	1285	21.3694	0.788637	1.06935	1.34865	0.740159	0.210821	29.6925	1.05843	14.5867	0.72342	0.273838	0.237152	0.0463193	0.0589518	5.45877	0.229595	2.64276	0.39807	0	0	0.279053	0.157714	0	0	0	0
Sol 789	1286	27.5221	1.42307	0.350431	1.01835	0.583665	0.208884	36.5843	1.29677	11.4713	0.614528	0.322625	0.232874	0.014298	0.0364948	6.06454	0.336486	3.52844	0.381105	0	0	0.400034	0.158833	0	0	0	0
Sol 789	1287	49.3109	1.7754	0.502008	0.820494	0.406995	0.177351	12.4396	0.629597	8.4505	0.464929	0.263033	0.213364	0.102424	0.0914286	6.20155	0.344857	2.49663	0.538168	0	0	0.134943	0.145698	0	0	0	0
Sol 789	1288	31.7795	1.15697	0.8118	0.944257	0.794246	0.220503	27.7563	0.984186	13.9498	0.69023	0.523907	0.188506	0	0	7.15984	0.397017	2.62171	0.537823	0	0	0.378578	0.161879	0	0	0	0
Sol 789	1289	32.7398	1.18997	1.3833	1.24463	0.901784	0.242538	22.7086	0.805643	18.6207	0.844608	1.05922	0.340592	0	0	7.41347	0.409342	2.21784	0.533321	0.0112622	0.0246988	0.317312	0.155848	0	0	0	0
Sol 789	1290	29.2182	1.06427	0.596763	0.778861	0.352795	0.189913	17.4509	0.888146	20.0063	0.8906	0.23068	0.207472	0	0	5.10254	0.287857	1.12357	0.254227	0	0	0.181567	0.181078	0.0587033	0.0737786	0	0
Sol 789	1291	26.7428	0.977291	0.176771	0.794972	0.733785	0.209618	21.2996	1.08507	17.7806	1.15255	0.360893	0.163554	0.0118072	0.0330406	5.0458	0.28493	1.47519	0.307824	0	0	0.211837	0.196799	0	0	0	0
Sol 789	1292	32.3078	1.67659	1.21306	1.27226	1.22426	0.299607	25.0572	1.27009	19.4521	1.24885	0.9733	0.32038	0	0	8.816	0.485565	2.4426	0.556991	0	0	0.388996	0.143148	0	0	0.0432	0.0667003
Sol 789	1293	33.9238	1.24118	0.288283	0.845768	0.96193	0.249758	25.295	0.904923	15.6476	0.740411	0.81613	0.196617	0.0339751	0.0488219	13.312	0.508893	2.52065	0.39673	0	0	0.353285	0.164119	0	0	0.0106719	0.0252471
Sol 789	1294	37.3926	1.36288	0	0	0.814752	0.223551	26.9263	0.96052	11.3898	0.592838	0.20451	0.198222	0	0	21.8798	0.836932	2.31198	0.38674	0	0	0.284777	0.158891	0	0	0	0
Sol 789	1295	53.4242	1.95532	0.282513	0.773702	0.609181	0.186838	19.5319	0.720246	11.61	0.590098	0.274623	0.15836	0	0	10.4262	0.410798	2.32421	0.388302	0	0	0.270784	0.14435	0	0	0.00902486	0.0225136
Sol 789	1296	50.2294	2.55586	0.125732	0.761046	0.534328	0.193924	17.0179	0.604462	10.9602	0.558249	0.208601	0.139071	0.00700122	0.028655	5.62228	0.31418	2.47406	0.394939	0	0	0.165728	0.169317	0	0	0	0
Sol 789	1297	39.2491	2.01452	0	0	0.804219	0.227834	32.6899	1.64472	15.3387	0.766383	0.661637	0.20147	0.0337714	0.0498001	7.88217	0.331851	2.96176	0.475777	0	0	0.3037	0.229304	0	0	0	0
Sol 789	1298	37.6418	1.39305	0	0	1.22234	0.29424	13.6807	0.691095	13.3309	0.655	0.53796	0.174849	0.0188309	0.0440009	8.73772	0.350707	3.33066	0.395781	0.0714261	0.0646062	0.057	0.0720006	0	0	0.00283918	0.011047
Sol 789	1299	48.7495	1.75834	0.325497	0.819766	1.01571	0.258006	16.9965	0.603503	12.6684	0.61622	0.2521	0.216812	0.0624005	0.0729879	5.34272	0.215531	2.76283	0.546924	0.00345017	0.0152618	0.155433	0.115706	0	0	0	0
Sol 789	1300	53.2741	1.99792	0.19902	0.78619	0.846409	0.23066	15.7474	0.581765	11.4659	0.60093	0.412554	0.157827	0	0	4.54428	0.634986	2.24089	0.380571	0	0	0.366665	0.163861	0	0	0	0
Sol 789	1301	28.0329	1.45425	2.0516	1.31502	1.48831	0.331176	25.802	0.921604	11.387	0.890963	1.17324	0.261247	0.0508352	0.0636719	17.9578	0.968533	2.00297	0.357029	0	0	0.280271	0.158122	0	0	0	0
Sol 789	1302	20.7257	0.763071	1.10476	1.31908	1.04283	0.263618	24.3807	0.865478	14.5781	0.705002	0.807603	0.194654	0	0	27.8669	1.05312	2.15863	0.377988	0	0	0.0062365	0.0168136	0	0	0	0
Sol 789	1303	33.7919	1.23204	0.08371	0.768326	0.595585	0.179107	19.556	0.701323	13.5012	0.65672	1.93821	0.359858	0	0	18.0042	0.698623	1.87387	0.354636	0	0	0.201123	0.135473	0	0	0	0
Sol 789	1304	36.2501	1.8537	0.529986	0.793802	0.641759	0.188343	17.5237	0.8797	15.3412	1.0103	0.7854	0.269	0.00939428	0.0306315	13.262	0.7163	1.6582	0.469	0	0	0.3582	0.2311	0	0	0	0
Sol 789	1305	29.0224	1.496	1.64142	1.02716	1.10007	0.275822	30.5623	1.5321	15.8095	1.074	0.47115	0.142575	0.18016	0.132617	7.80055	0.303177	2.6067	0.5644	0	0	0.471044	0.141816	0	0	0	0
Sol 789	1306	19.8853	0.738877	1.5635	1.40766	1.61291	0.345289	35.3557	1.2572	13.8119	0.699538	0.715087	0.176688	0.127039	0.105948	8.58457	0.333961	2.82957	0.402828	0	0	0.475797	0.150926	0	0	0	0
Sol 789	1307	29.8293	1.10363	1.37092	1.22002	1.82597	0.36941	23.6442	0.851097	14.8451	0.726828	0.525627	0.154891	0.0372557	0.0498586	6.05767	0.345515	2.75931	0.391665	0.0483706	0.0546715	0.234065	0.145884	0.0158695	0.0291304	0.0560073	0.0594846
Sol 789	1308	35.3187	1.30675	0.776934	1.09714	3.32616	0.412385	18.0132	0.645401	13.6464	0.662425	0.283261	0.140783	0.0315199	0.0450256	4.85658	0.287961	2.88177	0.393754	0.43775	0.147525	0.110855	0.0945478	1.02403	0.331062	1.20666	0.266149
Sol 789	1309	29.1494	1.07363	0.708934	0.983514	2.19514	0.394665	36.4186	1.29121	16.3807	0.78895	0.497308	0.146773	0.0760429	0.0728805	4.29143	0.305615	2.84564	0.4036	0	0	0.54235	0.161241	0	0	0.0595759	0.0673964
Sol 789	1310	25.8467	0.949051	0	0	1.45293	0.328125	37.4057	1.33024	17.2288	0.818966	0.42645	0.149031	0.0367215	0.0502719	4.0463	0.4804	2.76398	0.384914	0	0	0.4736	0.1965	0	0	0	0
Sol 789	1311	26.5832	0.973307	0	0	1.19072	0.289221	28.3789	1.55906	16.7618	0.78896	0.5115	0.185955	0	0	3.9056	0.508519	2.17815	0.374711	0	0	0.399	0.225178	0	0	0	0
Sol 789	1312	20.8687	0.77249	0.908247	0.976388	1.62584	0.350194	38.5789	1.36711	17.8482	0.859076	0.628048	0.222493	0	0	3.46816	0.384883	2.18885	0.368969	0	0	0.398139	0.222832	0	0	0	0
Sol 789	1313	13.6653	0.541538	1.0088	1.19791	0.886002	0.245158	50.5424	2.55049	17.237	0.885585	0.565727	0.177884	0	0	4.56679	0.328252	3.48206	0.363589	0	0	0.688795	0.238292	0	0	0	0
Sol 789	1314	16.6114	0.635975	2.92497	1.66093	0.967719	0.25836	51.3607	1.82534	15.2802	0.786539	0.475199	0.150609	0.0189636	0.0384768	4.94623	0.248377	4.01633	0.338754	0	0	0.701454	0.173267	0	0	0	0
Sol 789	1315	19.252	0.731137	1.96823	1.16677	0.964068	0.25868	44.6183	1.6033	12.8301	0.688012	0.379388	0.153272	0.0765442	0.08457	5.14246	0.288805	4.00855	0.34763	0	0	0.443522	0.150223	0.00240639	0.00928189	0	0
Sol 789	1316	18.4072	0.702027	0.49301	1.10377	0.825784	0.230106	44.2569	1.59066	14.7367	0.763465	0.494066	0.160709	0.0717352	0.080479	4.9871	0.312264	3.48901	0.382317	0	0	0.578323	0.147734	0	0	0	0
Sol 789	1317	24.0386	0.891788	2.25305	1.42372	1.01714	0.262708	39.2179	1.39332	17.2079	0.825908	0.663926	0.166276	0	0	4.05052	0.336806	2.66359	0.393366	0	0	0.555843	0.19799	0	0	0	0
Sol 789	1318	34.8311	1.26356	1.04603	1.84156	1.03888	0.264908	34.4729	1.22165	16.6928	0.792305	0.420371	0.217898	0	0	3.03569	0.402486	2.31404	0.546452	0	0	0.584937	0.20805	0	0	0	0
Sol 789	1319	27.656	1.02395	0	0	1.01275	0.261243	36.9178	1.33996	18.489	0.892956	0.586466	0.17841	0.0565535	0.0685143	3.38818	0.363152	1.62497	0.503625	0	0	0.544574	0.138868	0	0	0	0
Sol 789	1320	25.329	1.12695	1.71942	1.21018	1.72505	0.378308	31.4723	1.24216	16.8486	0.960091	0.639498	0.207808	0.114493	0.112505	5.30231	0.390009	2.40237	0.392486	0	0	0.366618	0.137576	0	0	0.117743	0.112477
Sol 789	1321	33.1937	1.32572	1.57748	1.30402	2.39864	0.383634	22.8194	0.908543	13.6881	0.72774	0.297663	0.105924	0	0	5.37506	0.382598	2.87981	0.389538	0.175721	0.12558	0.125679	0.110588	0.771998	0.261991	1.18052	0.268318
Sol 789	1322	32.8918	1.24399	1.11213	1.2219	1.52185	0.337668	24.7445	0.907729	15.8272	0.769966	0.311218	0.155957	0	0	5.57028	0.27537	2.50949	0.398514	0	0	0.183906	0.128819	0.288708	0.222085	0.361636	0.21037
Sol 789	1323	22.0984	0.813871	0.407083	0.971114	1.02228	0.261672	26.202	1.33918	15.0322	1.04107	0.632563	0.224058	0	0	5.94254	0.33432	1.76315	0.487603	0	0	0.34314	0.234517	0	0	0	0
Sol 789	1324	23.9718	0.905225	0.700447	1.41378	1.18367	0.292956	35.2501	1.27788	16.6476	0.810141	0.63103	0.164597	0.0672145	0.0782807	8.38549	0.333524	2.66711	0.399538	0	0	0.497904	0.179406	0	0	0	0
Sol 789	1325	32.048	1.6446	2.19856	1.24897	1.18881	0.286669	20.1315	1.0102	14.0033	0.956	0.345	0.2323	0.0287	0.0706	10.0282	0.5452	2.1677	0.5355	0	0	0.286465	0.159081	0	0	0	0
Sol 789	1326	44.4596	1.59983	1.19961	1.07144	0.583239	0.175085	12.3937	0.440503	12.2493	0.594489	0.334221	0.164225	0.00219901	0.0226898	15.0449	0.574324	1.92349	0.358813	0.0101015	0.0247537	0.163261	0.119575	0	0	0	0
Sol 789	1327	30.8059	1.11998	0.77483	0.903539	0.588588	0.207347	23.587	0.837071	14.747	0.708395	0.291583	0.160741	0	0	21.8044	0.827347	1.90226	0.357297	0	0	0.247186	0.151693	0	0	0	0
Sol 789	1328	28.9229	1.0838	1.16333	0.961159	0.674742	0.212598	23.821	0.857262	14.3761	0.708147	0.455165	0.152608	0	0	21.1363	0.820362	1.99578	0.363561	0	0	0.167977	0.121458	0	0	0	0
Sol 789	1329	41.0598	1.52718	0.302847	0.874421	1.26077	0.302157	22.2866	0.814828	13.7803	0.694223	0.430179	0.152588	0	0	8.57977	0.343797	2.43999	0.394592	0	0	0.374804	0.206948	0	0	0	0
Sol 789	1330	44.5973	2.31998	1.25467	0.960096	1.09834	0.274321	28.3054	1.44902	11.7993	0.610322	0.369515	0.138975	0.00759793	0.0287709	4.68103	0.298013	2.77635	0.404421	0	0	0.358113	0.160987	0	0	0	0
Sol 789	1331	45.5034	2.33643	1.13056	1.21513	0.671708	0.216372	20.7174	1.04857	10.1318	0.547558	0.380312	0.155019	0.0840912	0.0906429	6.35224	0.307911	2.55253	0.399717	0	0	0.203624	0.138594	0	0	0	0
Sol 789	1332	32.4146	1.83953	0	0	0.944209	0.247898	27.7894	0.991363	13.1519	0.662788	0.384487	0.155729	0.0347864	0.0480396	5.259	0.319634	3.02206	0.403911	0	0	0.291296	0.160134	0	0	0	0
Sol 789	1333	25.2902	0.928762	1.12881	1.08768	0.966771	0.252991	37.7534	1.92483	12.5263	0.944939	0.354837	0.220591	0	0	4.33182	0.302731	3.28435	0.592569	0	0	0.408748	0.238231	0	0	0	0
Sol 789	1334	39.6512	1.43619	1.07026	1.24429	1.14093	0.279948	23.7206	1.2014	14.3163	0.69175	0.653931	0.162938	0.0520903	0.0626295	4.87775	0.411011	3.22446	0.390764	0.00140109	0.00980765	0.219764	0.209086	0	0	0	0
Sol 789	1335	47.995	1.75101	1.27507	0.898523	0.505914	0.193085	17.6174	0.640524	12.509	0.619059	0.893701	0.212251	0	0	8.02094	0.314321	2.2483	0.384423	0	0	0.219574	0.141294	0	0	0	0
Sol 789	1336	25.229	1.32048	1.24657	0.880379	0.697939	0.203224	31.1616	1.10858	16.9943	1.13814	0.40797	0.147799	0.0696245	0.0788816	9.45916	0.368371	1.7031	0.337136	0	0	0.4549	0.205729	0	0	0	0
Sol 789	1337	27.6	1.03395	0.636328	0.755112	0.216833	0.16855	22.7449	1.15402	22.0718	0.994571	0.123524	0.142601	0	0	4.66087	0.30498	0.612668	0.224798	0	0	0.295537	0.250389	0	0	0	0
Sol 789	1338	32.7765	1.19317	0.179238	0.77868	0.138288	0.144223	28.6336	1.01544	26.7286	1.13538	0.147197	0.111586	0	0	3.67507	0.373894	0.439405	0.21667	0	0	0.389713	0.227367	0	0	0	0
Sol 789	1339	29.9865	1.10523	0	0	0.199506	0.16641	28.2302	1.01009	26.6863	1.14336	0.223226	0.143996	0	0	5.8336	0.264797	0.541065	0.157883	0	0	0.393768	0.192087	0	0	0	0
Sol 789	1340	29.9739	1.5445	0	0	1.0666	0.3863	33.4872	1.6783	22.7716	1.4158	1.3355	0.4056	0	0	9.0103	0.4914	2.2999	0.5469	0	0	0.4204	0.2191	0	0	0	0
Sol 789	1341	26.5352	0.971134	1.91642	1.30516	1.14238	0.279192	21.5592	0.764938	14.1772	0.6921	0.692476	0.171045	0.158909	0.121663	9.64609	0.372056	3.14588	0.398509	0	0	0.288142	0.159978	0	0	0	0
Sol 789	1342	31.2747	1.66892	0	0	0.70477	0.244589	32.4325	1.68992	13.021	0.691409	0.437628	0.158886	0.105206	0.104902	7.09172	0.29541	4.1308	0.46542	0	0	0.3589	0.231356	0	0	0	0
Sol 789	1343	22.4379	1.17349	2.19458	1.63143	0.560827	0.221111	40.202	1.49657	12.9052	0.755802	0.489704	0.169015	0	0	5.16706	0.35838	4.15417	0.340913	0	0	0.403495	0.150665	0	0	0	0
Sol 789	1344	39.5067	2.02179	1.25734	1.32262	0.841578	0.30494	27.931	1.32016	14.7688	1.07159	0.645169	0.210513	0.0506839	0.0693798	5.214	0.402652	3.50579	0.409206	0	0	0.325725	0.131594	0	0	0	0
Sol 789	1345	25.3465	1.13253	0.695328	1.0001	0.529988	0.20501	5.53526	1.28363	5.93227	1.48155	0.0719715	0.140441	0	0	1.82452	0.629011	0.966942	0.52007	0	0	0	0	0	0	0	0
Sol 789	1346	22.3157	1.6148	0.456719	1.45014	0.56141	0.718769	25.5967	1.53934	18.7733	3.39635	0.332055	0.175886	0.0916105	0.116143	6.50099	0.597246	1.44852	0.382136	0	0	0.275644	0.150202	0	0	0	0
Sol 789	1347	22.113	0.887541	0.826474	0.756786	0.410934	0.169449	23.3553	0.896339	19.302	0.930946	0.0264726	0.0661822	0.0379745	0.0499293	3.73295	0.864766	0.252736	0.264741	0	0	0.242949	0.131574	0	0	0	0
Sol 789	1348	29.6714	1.53259	0.773495	0.890363	0.736502	0.23144	26.6619	1.34236	19.5514	1.23496	0.388878	0.134045	0	0	3.78402	0.320019	0.733707	0.221843	0	0	0.484069	0.168394	0	0	0	0
Sol 789	1349	28.7668	1.08789	0.421491	0.781053	1.18501	0.292251	26.8759	1.35425	18.4606	1.18932	0.343755	0.124299	0	0	4.26716	0.340721	1.04307	0.252425	0	0	0.358741	0.144954	0	0	0	0
Sol 789	1350	38.3806	1.742	0.531046	0.808157	0.690079	0.253351	21.8421	1.10644	14.9557	0.973889	0.249083	0.141421	0.060832	0.0759433	3.71737	0.30125	1.22403	0.306563	0	0	0.530283	0.173736	0.00237937	0.00917014	0	0
Sol 789	1351	39.315	1.97621	4.93752	3.57476	0.60145	0.242626	24.0685	1.22431	16.4233	1.0669	0.597782	0.209679	0.274105	0.142848	3.42595	0.368585	0.64827	0.513316	0	0	0.641246	0.206043	0	0	0	0
Sol 789	1352	51.2077	2.60758	0.483896	0.673113	0.598235	0.221674	21.2403	0.943182	11.099	0.694723	0.889368	0.260043	0.236073	0.121383	3.35514	0.275377	1.47355	0.298503	0	0	0.237826	0.1444	0	0	0	0
Sol 789	1353	55.7554	2.83314	1.45682	0.981628	0.659518	0.232	19.7504	0.812896	8.97752	1.03218	0.1109	0.12711	0.226156	0.136679	3.57727	0.291652	0.901601	0.262912	0	0	0.214384	0.141143	0	0	0	0
Sol 789	1354	57.9366	2.94202	1.08016	1.04889	0.668825	0.243573	23.0684	1.03997	11.6979	1.3847	0.513568	0.172027	0.0653326	0.0809161	4.58165	0.355345	1.27324	0.310892	0	0	0.386063	0.137661	0	0	0	0
Sol 789	1355	30.7149	1.24531	2.12285	0.97431	0.55545	0.201301	31.0617	1.1737	14.3338	0.835717	0.609287	0.192778	0	0	2.529	0.360559	1.23253	0.276009	0	0	0.540172	0.189804	0	0	0	0
Sol 789	1356	20.5081	0.817114	1.24483	1.36608	0.724776	0.236537	35.4401	1.36008	19.039	1.01199	0.573695	0.185136	0	0	4.18784	0.332564	1.37598	0.290795	0	0	0.592119	0.164937	0.0228897	0.0316736	0	0
Sol 789	1357	49.691	2.5281	0.18225	0.727496	0.263441	0.118755	18.1424	0.9107	7.036	0.5946	0.2246	0.2056	0	0	2.9045	0.5713	0.7001	0.2462	0	0	0.5795	0.2064	0	0	0	0
Sol 789	1358	74.8351	2.69235	0.587247	0.686827	0.135405	0.134362	8.71845	0.314452	5.4129	0.48308	0.089	0.10641	0.0283216	0.0422039	3.5919	0.540662	0.8785	0.297543	0	0	0.110943	0.0907678	0	0	0	0
Sol 789	1359	61.9036	2.23528	0.0563528	0.650121	0.373962	0.180738	11.2516	0.430192	6.99778	0.400366	0.466711	0.144288	0.0143819	0.035526	4.65505	0.268021	1.82964	0.350008	0	0	0.108951	0.0894155	0	0	0	0
Sol 789	1360	29.3144	1.08345	2.32376	1.54043	0.566485	0.183356	41.0647	1.47332	13.4043	0.698748	1.6779	0.469908	0	0	7.6432	0.426194	3.96789	0.35148	0	0	0.474428	0.156348	0	0	0	0
Sol 789	1361	27.484	1.00461	0.535553	0.929018	0.844865	0.231251	32.2926	1.1513	16.4651	0.784364	0.510621	0.138447	0	0	3.85529	0.357747	3.02119	0.39992	0	0	0.417059	0.14928	0	0	0	0
Sol 789	1362	37.5455	1.92464	0.689039	0.85529	0.608626	0.197411	26.7872	0.949977	16.2952	0.764374	0.60864	0.217474	0	0	4.05001	0.527265	2.27354	0.384531	0	0	0.339674	0.163505	0	0	0	0
Sol 789	1363	52.6293	1.89643	0	0	0.545562	0.167399	10.9501	0.389979	10.5679	0.527782	0.155377	0.115684	0.0346201	0.0470774	3.5454	0.376581	2.6211	0.399343	0.0357147	0.0461243	0.135511	0.10471	0	0	0.013308	0.028059
Sol 789	1364	51.5744	1.85143	0	0	0.758609	0.209285	6.40449	0.325265	11.1309	0.763052	0.0990372	0.0823889	0	0	3.49586	0.382078	2.76383	0.399898	0.119024	0.134976	0.0457612	0.0459587	0.0161516	0.0293288	0.104305	0.121074
Sol 789	1365	37.6832	1.9257	0.910878	1.12155	0.773156	0.213712	15.7411	0.559362	14.9743	0.699284	0.184791	0.129633	0.0373463	0.0540227	3.47266	0.388	2.94742	0.402411	0.0142945	0.0308402	0.1732	0.1762	0	0	0.0666157	0.0598658
Sol 789	1366	20.9372	1.10302	0	0	0.820218	0.230141	38.7109	1.37239	12.8406	0.67034	0.401389	0.156453	0.0451656	0.0580343	5.54328	0.218156	4.39298	0.292589	0	0	0.568049	0.143697	0	0	0	0
Sol 789	1367	21.4466	0.791637	0	0	0.348523	0.16429	35.5066	1.26336	22.0066	0.983189	0.258191	0.151845	0.0754519	0.0717394	4.3001	0.30912	2.42967	0.392551	0	0	0.432551	0.219059	0	0	0	0
Sol 789	1368	33.8929	1.23118	0	0	0.335906	0.187793	26.9644	1.36627	31.1634	1.28355	0.140075	0.107789	0	0	1.74058	0.478412	0.416058	0.156572	0	0	0.319219	0.227198	0	0	0	0
Sol 789	1369	28.8084	1.05138	1.01824	1.15069	0.375487	0.182121	29.5766	1.04846	26.8154	1.13819	0.179973	0.126958	0	0	2.80383	0.402375	1.17121	0.262047	0	0	0.353355	0.231014	0.0597636	0.0672591	0	0
Sol 789	1370	22.4755	0.827926	0.130661	0.914285	0.690699	0.224475	34.5599	1.2251	21.5959	0.967238	0.289316	0.159912	0	0	4.16816	0.467759	2.53215	0.394862	0	0	0.418744	0.217574	0.0320835	0.0399295	0	0
Sol 789	1371	25.8059	0.94488	0.381568	0.835411	0.591465	0.182261	30.2442	1.07205	23.5792	1.02721	0.256095	0.150904	0	0	4.68055	0.252614	1.85928	0.352612	0	0	0.418033	0.218349	0	0	0	0
Sol 789	1372	29.3548	1.07031	0.268267	0.781775	0.438602	0.17831	26.2886	1.33701	26.3845	1.11833	0.175033	0.125271	0	0	3.04152	0.582089	0.926406	0.21882	0	0	0.307288	0.225968	0	0	0	0
Sol 789	1373	30.0078	1.09552	0	0	0.124844	0.134041	27.1679	0.963859	27.6833	1.16547	0.177054	0.126461	0	0	2.17348	0.555656	0.837266	0.288114	0	0	0.320323	0.219497	0	0	0	0
Sol 789	1374	30.4003	1.18372	0.457603	0.700775	0.416603	0.161095	27.1645	1.0227	26.9847	1.18308	0.186416	0.131178	0	0	2.51397	0.382621	0.865929	0.213344	0	0	0.361549	0.196684	0	0	0	0
Sol 789	1375	26.7938	1.02514	0	0	0.539691	0.199816	28.6383	1.06596	23.9381	1.097	0.232477	0.143201	0.0174142	0.0378081	3.00374	0.375884	1.66262	0.326001	0	0	0.43105	0.15576	0	0	0	0
Sol 789	1376	17.1155	0.699504	1.34856	1.11072	0.966363	0.261285	40.5591	1.46108	17.414	0.903781	0.264839	0.151261	0	0	4.44468	0.320546	3.86372	0.363014	0	0	0.424789	0.169987	0	0	0	0
Sol 789	1377	12.9302	0.517837	0.859281	1.18688	0.8517	0.236589	42.7318	1.53023	14.0704	0.741308	0.42655	0.152939	0.0813973	0.0881409	5.32382	0.31233	4.39085	0.304887	0	0	0.565624	0.156119	0	0	0	0
Sol 789	1378	25.9514	0.951709	1.371	1.41003	0.898339	0.242549	36.9717	1.31185	18.1329	0.850801	0.2721	0.223329	0.0149754	0.0364119	3.35885	0.387031	3.04018	0.401719	0	0	0.389111	0.160689	0	0	0	0
Sol 789	1379	49.7795	1.78992	0.2339	0.726975	0.529636	0.16765	11.3264	0.402788	14.1214	0.656517	0.0946956	0.0797077	0	0	2.98666	0.401714	2.6833	0.400576	0.0922	0.1103	0.0751569	0.0648731	0.00584972	0.0159492	0.0203	0.0485
Sol 789	1380	49.018	1.76244	0.793313	1.1035	0.694048	0.198035	13.2975	0.473658	12.215	0.597663	0.130063	0.102132	0.0404954	0.0534497	3.18281	0.399647	3.43852	0.546859	0.00842922	0.0237764	0.12471	0.0983986	0	0	0.0127461	0.0264459
Sol 789	1381	44.8052	1.61675	0	0	0.946495	0.251805	30.4133	1.07931	15.7164	0.744454	0.138629	0.107294	0	0	3.45409	0.388508	3.92317	0.348872	0	0	0.224369	0.145089	0.15469	0.115378	0	0
Sol 789	1382	49.0907	1.76823	0.713346	1.15171	1.04545	0.266872	25.5091	0.904467	17.6795	0.805565	0.0498155	0.0524691	0	0	2.53778	0.39751	3.28697	0.393893	0.0660097	0.0653808	0.195638	0.134437	0.30763	0.160617	0	0
Sol 789	1383	46.4	1.68728	0.325644	0.876726	0.924244	0.247217	24.9633	0.896224	16.7488	0.772983	0.335921	0.164373	0	0	3.19581	0.40028	3.46107	0.386475	0.0874836	0.0755561	0.249536	0.15187	0.00838355	0.0185791	0	0
Sol 789	1384	53.0283	2.80635	0	0	0.56628	0.196434	12.1754	0.638839	12.4959	0.600165	0.1883	0.186222	0	0	2.97003	0.402972	2.79314	0.401582	0.059569	0.0541133	0.1311	0.144513	0	0	0	0
Sol 789	1385	60.804	2.17687	0	0	0.279729	0.138829	11.9964	0.42636	8.78799	0.462388	0.358243	0.163763	0	0	2.83811	0.403615	1.13606	0.256495	0	0	0.12389	0.138508	0	0	0	0
Sol 789	1386	58.2339	2.09627	0.379064	0.696674	0.232336	0.158459	14.8084	0.527802	10.0022	0.516817	0.773624	0.187999	0	0	3.9343	0.501034	0.781	0.270194	0	0	0.274396	0.157683	0	0	0	0
Sol 789	1387	49.5165	1.84462	0.525446	1.04973	0.313534	0.144538	16.9145	0.622976	12.3067	0.651218	0.743157	0.184346	0.0366951	0.0501488	3.86223	0.318129	1.31037	0.282232	0.0855102	0.0776256	0.343608	0.150323	0	0	0	0
Sol 789	1388	57.5375	2.16967	0	0	0.681541	0.229427	19.1873	0.723746	12.1906	0.665861	0.573538	0.181413	0	0	3.36011	0.380654	1.26697	0.372846	0	0	0.297867	0.157494	0.0816567	0.084841	0.0941201	0.0937328
Sol 789	1389	80.9869	4.1027	0.147864	0.63931	0.454834	0.183821	10.1338	0.43643	7.34598	0.544047	0.225343	0.130545	0	0	3.83707	0.326501	1.05491	0.250244	0	0	0.108705	0.0982592	0.0576246	0.0627908	0.0735154	0.0728831
Sol 789	1390	79.9885	2.91254	0.257145	0.712486	0	0	20.7567	0.746091	5.47369	0.434041	0.0658396	0.0840228	0	0	2.87847	0.38295	0.499712	0.164275	0	0	0.244753	0.14797	0.00481287	0.013837	0	0
Sol 789	1391	63.6317	2.33087	0	0	0.293946	0.136919	21.1824	0.783027	10.3623	0.557613	0.648702	0.171787	0	0	2.25738	0.380723	0.602787	0.154955	0	0	0.32804	0.14557	0	0	0.00650669	0.0182493
Sol 789	1392	36.4522	1.38833	0	0	0.383518	0.172332	31.2703	1.58911	17.919	0.853519	1.1405	0.259016	0	0	2.56794	0.397523	0.536234	0.279773	0	0	0.693241	0.173245	0	0	0	0
Sol 789	1393	38.1336	1.47988	0	0	0.485562	0.198105	30.3804	1.15683	16.5008	0.836582	0.41222	0.15289	0	0	3.53634	0.364643	1.03628	0.36292	0	0	0.402118	0.151478	0	0	0	0
Sol 789	1394	27.7395	1.02422	0	0	0.735266	0.21161	23.7623	0.852878	20.0874	0.902981	0.835061	0.277872	0	0	4.62309	0.259831	0.792363	0.268057	0	0	0.275302	0.151889	0	0	0	0
Sol 789	1395	29.9705	1.13289	0	0	0.678131	0.199247	26.6628	0.966966	25.9212	1.1511	0.193166	0.133646	0	0	3.41478	0.390364	0.329842	0.207477	0	0	0.334657	0.154062	0	0	0	0
Sol 789	1396	29.8754	1.09029	0.341203	0.774908	0.310127	0.184004	27.6927	0.982747	25.4697	1.09072	0.17824	0.127082	0	0	4.53277	0.276417	0.468521	0.192486	0	0	0.338279	0.16226	0	0	0	0
Sol 789	1397	26.5244	1.04465	0	0	0.475068	0.189866	27.3828	1.01197	23.1516	1.13709	0.195814	0.131047	0	0	5.62571	0.353612	0.647468	0.190831	0	0	0.333446	0.142906	0	0	0	0
Sol 789	1398	39.4868	2.02067	0.0780588	0.916403	0.409438	0.212709	23.3118	1.01609	20.0715	1.24781	0.242259	0.150722	0	0	5.34052	0.411574	1.08703	0.327243	0	0	0.309461	0.149402	0	0	0	0
Sol 789	1399	44.5773	1.7526	0.327467	0.848348	0.853447	0.233825	20.5566	0.766383	12.1627	0.64432	0.241408	0.116232	0	0	3.1738	0.329841	1.85047	0.347671	0	0	0.294411	0.152834	0	0	0	0
Sol 789	1400	31.7746	1.3111	0.289186	1.3972	0.433613	0.173065	32.2104	1.27527	13.2415	0.740937	0.408128	0.141742	0.0811445	0.0890426	4.25056	0.342502	2.82165	0.386743	0	0	0.39962	0.146474	0	0	0	0
Sol 789	1401	24.5001	0.931692	2.42703	1.56659	0.683012	0.220853	41.6435	1.52406	14.8747	0.806883	0.452206	0.158129	0	0	6.95171	0.300988	3.41938	0.379552	0	0	0.523745	0.166899	0	0	0	0
Sol 789	1402	33.0701	1.74269	0.514582	1.02467	0.834939	0.271312	34.5234	1.77713	15.6146	0.814752	0.509738	0.174583	0	0	10.7761	0.598452	3.3193	0.557167	0	0	0.3771	0.229243	0	0	0.0279941	0.0359888
Sol 789	1403	22.0635	0.817304	0.269927	0.961487	0.973795	0.25392	35.541	1.26386	14.6555	0.736768	0.879869	0.208684	0	0	7.39811	0.287114	2.63434	0.546545	0	0	0.407829	0.153414	0	0	0	0
Sol 789	1404	30.3922	1.13472	0.677063	0.876881	0.630139	0.218859	24.4429	0.890253	18.6016	0.882692	0.66428	0.165932	0	0	6.04133	0.302828	1.26341	0.278073	0	0	0.376733	0.161968	0	0	0	0
Sol 789	1405	29.3804	1.10555	0.299788	0.753526	0.499311	0.196858	26.6877	0.966014	26.0338	1.14171	0.161511	0.118299	0	0	6.75424	0.275559	0.463497	0.154917	0	0	0.41223	0.182199	0	0	0	0
Sol 789	1406	32.7333	1.71882	0.818221	0.837566	0.229303	0.170576	28.0747	0.995811	28.6676	1.20222	0.125312	0.0991846	0	0	3.57443	0.379946	0.281305	0.217812	0	0	0.4026	0.224041	0	0	0	0
Sol 789	1407	29.5782	1.11468	0.686098	0.837426	0.148148	0.145824	26.6089	0.97103	26.2629	1.14881	0.184153	0.1704	0	0	3.2494	0.424609	0.469066	0.170014	0	0	0.317408	0.273602	0	0	0	0
Sol 789	1408	28.953	1.0579	0.268622	0.810403	0.14715	0.204654	27.9918	0.993841	18.0967	0.83799	0.2682	0.221915	0	0	5.4775	0.309168	1.9648	0.512752	0	0	0.63338	0.168703	0	0	0	0
Sol 789	1409	46.7372	1.68907	0.410447	0.79799	0.786395	0.217999	14.4068	0.517476	13.6386	0.648977	0.429768	0.153767	0	0	4.89544	0.288473	2.70253	0.398933	0.00566649	0.0175511	0.201789	0.201459	0	0	0.0179038	0.0318544
Sol 789	1410	37.6647	1.99445	0.876543	0.837784	1.03243	0.261029	18.2391	0.647559	13.8285	0.664914	0.7623	0.185541	0.11616	0.103412	3.55649	0.374221	3.13083	0.399425	0.0233826	0.0379262	0.3004	0.228651	0	0	0.0091132	0.0228831
Sol 789	1411	37.0598	1.34396	0.272142	1.27509	1.12951	0.279494	26.8977	0.953866	14.6907	0.712922	0.401871	0.228373	0	0	3.93368	0.351476	3.26725	0.393989	0	0	0.367805	0.227554	0	0	0	0
Sol 789	1412	49.7478	1.79339	0.644419	0.808841	0.727367	0.204486	15.0169	0.539095	10.0119	0.524992	0.238969	0.147234	0.0340697	0.0499926	5.52466	0.218188	2.31037	0.386454	0	0	0.198857	0.135752	0	0	0	0
Sol 789	1413	46.8482	2.41143	0	0	0.561386	0.181122	13.0953	0.666592	10.4288	0.747257	0.333748	0.158797	0	0	5.1888	0.302567	1.67597	0.443128	0	0	0.124507	0.137872	0	0	0.0189351	0.0334333
Sol 789	1414	44.2775	1.59762	0.776557	1.14688	0.882225	0.235253	21.4108	0.759676	11.3071	0.577811	0.301512	0.162007	0.00354697	0.0249287	5.32297	0.210117	2.51816	0.396129	0	0	0.24486	0.150588	0	0	0	0
Sol 789	1415	45.195	1.63469	0	0	1.33631	0.309358	19.3517	0.686905	13.1363	0.641919	0.288527	0.160176	0	0	13.0817	0.500013	2.17462	0.378771	0	0	0.355269	0.163376	0	0	0	0
Sol 789	1416	40.1718	1.45749	0	0	0.658612	0.192799	22.9718	0.814956	13.2173	0.652413	0.284058	0.158868	0	0	16.5524	0.630652	1.41378	0.299375	0	0	0.302801	0.156301	0	0	0	0
Sol 789	1417	32.6658	1.18526	0.935812	0.86883	0.996107	0.255753	22.169	1.15696	16.7552	0.777097	0.3398	0.232451	0	0	14.333	0.799953	1.6355	0.465396	0	0	0.260406	0.153656	0	0	0	0
Sol 789	1418	23.8589	1.28721	1.46322	1.3211	0.996136	0.257475	24.7291	1.29423	14.5065	1.02389	0.3651	0.231264	0.010045	0.0361992	11.8756	0.666728	2.3775	0.55364	0	0	0.299824	0.161399	0	0	0	0
Sol 789	1419	19.8149	0.736175	1.20378	1.01244	1.21189	0.29474	39.3291	1.40706	17.2287	0.829451	0.51335	0.150675	0	0	8.64049	0.338819	2.50928	0.397501	0	0	0.620917	0.156317	0	0	0	0
Sol 789	1420	28.741	1.50245	0	0	0.98585	0.255102	32.2989	1.64267	15.2898	1.05175	0.603392	0.151824	0	0	6.27613	0.245841	1.72161	0.471729	0	0	0.47422	0.138029	0	0	0	0
Sol 789	1421	31.6007	1.15027	1.00944	1.22095	0.979849	0.252355	23.6248	1.20026	14.1628	0.693489	0.475937	0.221621	0	0	8.70989	0.481553	1.61703	0.451293	0	0	0.204942	0.200072	0	0	0	0
Sol 789	1422	28.555	1.4732	0.26516	0.861724	1.3973	0.328299	23.5079	0.933963	14.0445	0.733204	0.658772	0.204799	0	0	19.0283	0.824861	1.97483	0.47026	0	0	0.102845	0.0933927	0	0	0.0301394	0.0387843
Sol 789	1423	16.4752	0.784222	0.602368	0.989505	1.09774	0.318904	26.5379	1.05101	12.802	0.876349	0.57796	0.185428	0	0	8.80665	0.503711	1.74721	0.330665	0	0	0.325563	0.112234	0	0	0.0314104	0.0398771
Sol 789	1424	27.1405	1.19441	0.335302	1.14044	1.15566	0.354955	35.7611	1.82768	18.7426	1.09438	0.704184	0.225656	0	0	5.72043	0.416594	2.08919	0.372274	0	0	0.436701	0.154597	0	0	0	0
Sol 789	1425	40.3818	1.48889	0.353359	1.20738	0.833608	0.227073	28.2161	1.01496	14.8069	0.720232	0.254451	0.229497	0	0	3.61142	0.370422	1.87552	0.34939	0	0	0.465271	0.153428	0	0	0	0
Sol 789	1426	34.3402	1.24587	0	0	0.959707	0.252502	33.5546	1.6818	14.1625	0.700724	0.277	0.2244	0.0118916	0.0331374	3.34242	0.394097	2.99525	0.398789	0	0	0.5453	0.1957	0	0	0	0
Sol 789	1427	21.9946	0.829932	2.78206	1.5523	0.997866	0.259155	42.152	1.50367	13.6898	0.7262	0.509804	0.145399	0.0440294	0.057386	4.27703	0.310104	3.29076	0.386722	0	0	0.604146	0.152226	0	0	0	0
Sol 789	1428	15.3939	0.595592	2.6091	1.57541	1.05722	0.268638	41.8057	1.4898	12.01	0.668785	0.4627	0.151378	0.0516194	0.0642991	4.85013	0.290215	3.15878	0.398784	0	0	0.605418	0.153064	0	0	0	0
Sol 789	1429	20.3073	1.06634	1.9929	2.18352	1.11545	0.285212	42.7238	2.15001	16.2085	1.12326	0.6513	0.22942	0.0360844	0.05618	6.2206	0.34493	3.2565	0.558708	0	0	0.959453	0.25079	0	0	0	0
Sol 789	1430	17.4475	0.656489	1.98456	1.4766	0.932645	0.245889	44.2081	1.56655	16.2699	0.799769	0.442327	0.148917	0	0	4.674	0.25962	2.78416	0.394062	0	0	0.590366	0.148491	0	0	0	0
Sol 789	1431	16.4778	0.618178	0.694386	1.01385	0.82377	0.226223	43.3396	1.54365	17.2721	0.832766	0.374559	0.240819	0	0	4.32642	0.303757	2.3806	0.52828	0	0	0.4637	0.21816	0	0	0	0
Sol 789	1432	17.6727	0.691907	0	0	0.848691	0.233281	41.9851	1.5178	16.9789	0.845696	0.330753	0.266601	0	0	5.06103	0.329196	1.97834	0.361502	0	0	0.531221	0.162809	0	0	0	0
Sol 789	1433	17.7671	0.958321	1.03419	1.13372	1.03343	0.327406	35.1784	1.52089	15.7549	1.10282	0.821181	0.246175	0.035097	0.0522432	6.1421	0.45135	2.14666	0.388447	0	0	0.468359	0.159272	0	0	0	0
Sol 789	1434	15.1857	0.802484	0.792684	1.14082	0.87431	0.304076	26.9748	1.16118	14.0041	0.812458	1.27463	0.320887	0.0483511	0.0638447	7.10676	0.500358	1.62974	0.343658	0	0	0.43115	0.156187	0	0	0	0
Sol 789	1435	18.1346	0.67249	1.5106	1.24274	1.0188	0.257071	27.0793	0.96028	14.2691	0.700922	1.57193	0.448848	0	0	11.5958	0.637962	1.20439	0.37697	0	0	0.416226	0.226257	0	0	0	0
Sol 789	1436	29.7357	1.13955	2.75465	1.3116	1.30781	0.309754	24.458	0.89052	14.3702	0.717043	0.793355	0.263778	0.0545066	0.0679149	16.0607	0.877812	2.20066	0.381081	0	0	0.152437	0.115246	0	0	0	0
Sol 789	1437	29.684	1.08051	1.94715	1.26044	1.19481	0.288189	23.4872	1.19403	12.4048	0.892569	0.399142	0.230587	0	0	9.11249	0.502544	2.31986	0.554231	0	0	0.260641	0.221327	0	0	0	0
Sol 789	1438	21.3359	0.851087	0.960093	1.08304	0.895036	0.270508	34.0645	1.71271	17.1932	0.887811	0.54197	0.18363	0.0208462	0.0444443	13.6147	0.607576	1.85008	0.454329	0	0	0.5333	0.191812	0	0	0.0633138	0.07201
Sol 789	1439	20.4943	1.11083	1.18757	1.63446	1.29806	0.318767	34.2902	1.79055	16.493	0.854669	0.546615	0.184611	0.0540489	0.0691532	17.3578	0.714056	2.3313	0.550662	0	0	0.4872	0.189035	0	0	0	0
Sol 789	1440	28.5053	1.07895	1.46544	1.2523	1.09418	0.273047	25.585	0.909475	14.9667	0.726145	0.519382	0.187292	0.0478412	0.0603012	11.9878	0.649445	2.21331	0.526251	0	0	0.328792	0.161144	0	0	0	0
Sol 789	1441	46.2446	1.73938	0.943788	0.833418	0.78597	0.216666	10.5742	0.539397	9.54365	0.713144	0.594426	0.150443	0.0307478	0.0445756	9.51557	0.371904	2.28492	0.38038	0.0246208	0.0325093	0.102195	0.119196	0	0	0	0
Sol 789	1442	63.5616	2.31841	1.36744	1.01378	0.521718	0.193757	6.23875	0.317225	9.39129	0.488225	0.173716	0.12287	0	0	7.92242	0.311874	1.65684	0.330895	0.00943011	0.0215894	0.117977	0.0946527	0	0	0.0108892	0.0251405
Sol 789	1443	64.9955	2.3937	0	0	0.730472	0.204349	6.12718	0.31242	8.94241	0.476646	0.090546	0.0786677	0	0	4.35678	0.311417	1.74931	0.34059	0.00448141	0.0144513	0.120967	0.0970424	0	0	0.00712525	0.0189673
Sol 789	1444	45.0377	1.67015	0.651085	0.765737	1.18735	0.287242	10.67	0.380787	13.3686	0.64221	0.169897	0.123311	0	0	3.59786	0.378621	2.8199	0.401121	0.0372593	0.0469622	0.210224	0.140127	0	0	0.0146333	0.0299707
Sol 789	1445	51.2053	1.86779	0	0	0.742921	0.208108	11.0108	0.395082	12.9069	0.623955	0.211378	0.132338	0.0394436	0.0523237	4.18657	0.32331	2.33045	0.386773	0.0564664	0.0561963	0.122929	0.0975942	0	0	0.000703737	0.00723844
Sol 789	1446	45.7346	2.39949	0	0	0.893299	0.242119	18.8361	0.682852	13.9294	0.676757	0.529563	0.167743	0	0	4.03049	0.380512	2.08236	0.373423	0	0	0.366405	0.162521	0	0	0	0
Sol 789	1447	42.7745	1.57428	0.61245	0.831045	1.05829	0.26914	21.8402	0.788701	13.8159	0.692329	0.356635	0.164396	0	0	4.08431	0.343277	2.86531	0.405055	0.0196051	0.0337028	0.323389	0.165473	0	0	0	0
Sol 789	1448	43.856	1.58917	0.789265	0.872388	0.797168	0.220656	23.4934	0.849542	13.8135	0.676412	0.374904	0.162644	0.0877003	0.0908708	5.64817	0.27504	2.48355	0.395745	0	0	0.392325	0.154039	0	0	0	0
Sol 789	1449	27.7449	1.49738	2.02124	0.921233	0.47433	0.191907	30.4814	1.08496	22.2495	0.982859	0.250947	0.15204	0	0	4.86719	0.282472	1.43631	0.421228	0	0	0.456184	0.222643	0	0	0	0
Sol 789	1450	35.3369	1.28193	0	0	0.190881	0.162819	27.8586	0.987616	27.9773	1.17403	0.177123	0.126532	0	0	2.62313	0.400223	0.223939	0.206123	0	0	0.405858	0.221671	0	0	0	0
Sol 789	1451	31.084	1.13821	0.674829	0.802439	0.391627	0.16535	26.9288	0.956768	25.8518	1.10677	0.198747	0.135534	0	0	4.65237	0.288688	0.402677	0.159301	0	0	0.367722	0.20335	0	0	0	0
Sol 789	1452	35.9234	1.843	0.570468	0.793648	0.3925	0.2729	30.3183	1.5195	27.8816	1.22552	0.3194	0.2314	0	0	6.62507	0.295526	0.5426	0.1979	0	0	0.4304	0.2155	0	0	0	0
Sol 789	1453	37.8201	1.36636	0	0	0.597668	0.179238	11.4935	0.582442	11.7462	0.807287	0.370733	0.218995	0.0122583	0.0332226	5.94882	0.331137	0.714084	0.176918	0	0	0.333994	0.154615	0	0	0	0
Sol 789	1454	57.1276	2.09566	0.36243	1.03448	0.450579	0.178818	13.8568	0.503608	9.19484	0.490723	0.199395	0.208186	0.0684946	0.0696703	5.20002	0.312881	1.35115	0.388359	0	0	0.229859	0.146172	0	0	0	0
Sol 789	1455	56.9426	2.07692	0.551679	0.812053	0.771264	0.217737	23.0899	0.826076	11.0374	0.576673	0.165799	0.178872	0	0	5.37862	0.266001	2.04276	0.483645	0	0	0.487976	0.16165	0	0	0.00202684	0.00963986
Sol 789	1456	59.9995	2.18864	0.498925	0.782398	0.155939	0.15054	21.4031	0.772347	11.3653	0.584464	0.304808	0.161447	0	0	7.73494	0.306276	1.83029	0.349942	0	0	0.337505	0.157706	0	0	0.00547703	0.0161352
Sol 789	1457	56.0559	2.17002	0	0	0.416149	0.17401	14.2533	0.57472	9.5852	0.527544	0.262356	0.145795	0.0412232	0.0572785	6.27088	0.376989	1.54429	0.321509	0	0	0.197062	0.1336	0	0	0.00431674	0.0139907
Sol 789	1458	56.1187	2.8473	2.6218	1.6317	0.407768	0.187341	16.5828	0.8323	14.7832	1.01652	0.3356	0.2322	0.0160196	0.0440098	8.5965	0.4697	1.4709	0.4348	0	0	0.2787	0.2241	0	0	0	0
Sol 789	1459	24.313	1.06168	1.87943	1.39486	0.453993	0.183853	29.3007	1.09569	19.1362	1.05191	0.281513	0.130347	0.0216645	0.0423079	5.93635	0.392861	1.98032	0.364858	0	0	0.413104	0.151752	0	0	0	0
Sol 789	1460	29.1508	1.08351	0.684365	0.846925	0.610781	0.185028	27.8554	1.00145	24.6053	1.08602	0.192823	0.129702	0	0	4.75556	0.30936	1.19998	0.26696	0	0	0.362873	0.15228	0	0	0	0
Sol 789	1461	30.972	1.16582	0	0	0.782188	0.219446	25.2175	0.92021	22.1493	1.00369	0.184207	0.125244	0	0	4.60211	0.319861	0.878717	0.211176	0	0	0.33681	0.144827	0	0	0	0
Sol 789	1462	30.5331	1.29402	0.0224662	0.76613	0.531654	0.184196	26.7098	1.02152	25.1611	1.29005	0.175523	0.12685	0	0	3.65057	0.353265	0.43409	0.158654	0	0	0.350385	0.149566	0	0	0	0
Sol 789	1463	27.9593	1.03576	1.68434	1.19692	0.451771	0.175376	27.039	0.965418	20.6972	0.93036	0.557381	0.197385	0	0	4.21219	0.316169	0.982871	0.316241	0	0	0.3049	0.157999	0	0	0	0
Sol 789	1464	41.6377	1.51104	0.494744	0.822544	0.672362	0.196831	31.598	1.12267	16.6185	0.782556	0.562758	0.199968	0	0	3.71125	0.353672	1.29326	0.407921	0	0	0.46338	0.147697	0	0	0	0
Sol 789	1465	61.9963	2.28475	0.592246	0.996562	0.277611	0.181165	20.8499	0.761014	10.9153	0.569306	0.903495	0.216791	0	0	3.49741	0.38529	0.626612	0.228527	0	0	0.482709	0.156945	0	0	0.0520628	0.0605039
Sol 789	1466	55.1264	2.80317	0	0	0.174822	0.152152	20.932	0.744142	12.8905	0.622963	0.335662	0.248039	0	0	5.18794	0.232132	0.784017	0.191556	0	0	0.383831	0.154809	0	0	0	0
Sol 789	1467	69.883	3.54015	0	0	0.316306	0.150314	16.6046	0.589364	8.22652	0.44687	0.0840604	0.0740539	0.00587731	0.0261811	3.32033	0.580171	1.20353	0.381286	0	0	0.205026	0.137227	0	0	0	0
Sol 789	1468	73.6739	2.6947	0.827349	0.755397	0.535644	0.199759	9.52746	0.351163	8.05552	0.442392	0.0953881	0.0809624	0	0	3.19278	0.391732	1.3738	0.396985	0.0263187	0.0343335	0.0813971	0.0715305	0.0150657	0.0299291	0.00322444	0.0154583
Sol 789	1469	69.866	2.51731	1.74736	1.1374	0.690869	0.19892	19.2086	0.681966	11.4872	0.571054	0.388485	0.156933	0.0349378	0.0477399	3.16294	0.397079	1.56745	0.438439	0	0	0.323956	0.161397	0	0	0	0
Sol 789	1470	60.4529	2.17814	0.0436207	0.727463	0.449267	0.175576	18.5671	0.65994	12.7081	0.614517	0.535516	0.142507	0	0	3.18394	0.398142	1.58236	0.321592	0	0	0.304131	0.162146	0	0	0	0
Sol 789	1471	57.7935	2.9287	0.526637	0.763899	0.865564	0.229181	14.7165	0.7391	9.3726	0.6908	1.44583	0.302493	0	0	5.3007	0.2956	1.3195	0.4041	0	0	0.217854	0.142621	0	0	0	0
Sol 789	1472	59.1706	3.44858	0	0	0.729373	0.203083	11.1537	0.646485	9.56864	0.489682	0.6594	0.232479	0.0181779	0.0380083	4.1839	0.473624	1.951	0.514088	0.00164711	0.00973292	0.152319	0.113985	0	0	0	0
Sol 789	1473	47.546	2.46222	0	0	0.585332	0.178207	16.6034	0.849173	14.5746	0.679243	0.0827705	0.0720136	0	0	3.3526	0.393363	3.33467	0.391444	0.0991975	0.0835823	0.226417	0.145369	0	0	0	0
Sol 789	1474	32.4619	1.6682	0	0	0.708425	0.208851	37.0645	1.8574	16.8097	1.1287	0.2395	0.2122	0.0198209	0.0392895	3.4455	0.5498	4.0564	0.4734	0	0	0.5077	0.1836	0	0	0	0
Sol 789	1475	44.3108	1.60814	0.194173	0.823154	1.02507	0.264347	25.4982	0.904218	17.0839	0.786226	0.0611751	0.0551691	0	0	2.6036	0.399499	3.31404	0.392803	0.00159816	0.0107377	0.225814	0.145022	0.0888062	0.0754507	0	0
Sol 789	1476	50.7307	1.82688	1.70439	1.17819	0.97287	0.253025	16.9366	0.8502	14.6105	0.685686	0.0145911	0.030185	0	0	2.64488	0.4021	3.7032	0.522	0.0082	0.0296	0.1014	0.1181	0.140491	0.107826	0.000901864	0.00821698
Sol 789	1477	52.6505	1.8929	1.77758	0.795226	0.762463	0.211267	9.96816	0.355581	14.0009	0.648891	0.0469016	0.0486432	0.00341617	0.0222794	2.7237	0.402731	3.36028	0.391001	0.042766	0.0464753	0.0753125	0.0649829	0	0	0.0569888	0.0543899
Sol 789	1478	51.6393	1.85838	1.39035	1.09708	0.677274	0.196256	10.7607	0.383259	16.3928	0.738086	0.0216851	0.0515672	0	0	2.15302	0.377933	3.18504	0.395964	0.160495	0.118788	0.0847432	0.0720923	0.0217554	0.0351018	0.0669558	0.0597191
Sol 789	1479	37.9653	1.94399	0.213788	0.891898	0.9423	0.249366	27.8822	0.988615	16.4299	0.768462	0.153684	0.115168	0	0	2.85595	0.403851	3.64964	0.518468	0.016052	0.0316568	0.369755	0.161411	0	0	0	0
Sol 789	1480	18.9475	0.709987	2.12862	1.61031	1.10303	0.281326	43.1499	1.53487	14.2364	0.733174	0.4845	0.150505	0.0245132	0.0391933	4.7306	0.289314	4.37275	0.292647	0	0	0.679872	0.168222	0	0	0	0
Sol 789	1481	20.5726	1.0755	1.33462	1.45241	2.0544	0.5589	39.583	1.9836	15.291	1.0666	0.8074	0.2754	0.0212775	0.0390938	5.7044	0.3166	4.3804	0.4147	0.1591	0.1676	0.406	0.2235	0	0	0.106	0.1234
Sol 789	1482	24.9653	0.914349	1.41669	1.31723	2.43074	0.414671	27.702	1.41201	12.6888	0.910565	1.7274	0.483437	0.177092	0.127657	5.64767	0.317116	2.89474	0.553903	0.453173	0.219124	0.255163	0.214077	0	0	0.353048	0.153165
Sol 789	1483	29.2335	1.59527	0.216001	0.895844	1.24342	0.302562	29.0703	1.06512	18.7561	0.888707	0.632	0.223885	0	0	6.57987	0.264512	2.7576	0.570231	0	0	0.3926	0.226609	0	0	0	0
Sol 789	1484	25.9126	0.937673	1.45689	0.46883	0.741558	0.18961	28.4621	1.02715	24.5471	0.93406	0.378874	0.28164	0.109634	0.0897096	4.01906	0.684037	1.59569	0.321988	0	0	0.515124	0.181763	0	0	0	0
Sol 789	1485	26.5448	0.974693	0.705769	0.782724	0.232113	0.165552	25.1643	0.909005	25.6984	1.10412	0.160891	0.118706	0	0	3.48932	0.67555	0.782758	0.192174	0	0	0.324843	0.19953	0	0	0	0
Sol 789	1486	14.2127	0.762913	0	0	0.508253	0.186845	27.2755	0.969894	18.2777	0.849279	0.273619	0.154912	0	0	11.0258	0.438353	2.08412	0.495421	0	0	0.3815	0.228516	0	0	0	0
Sol 789	1487	12.915	0.492965	0.603712	1.09784	1.39097	0.322592	48.9431	1.73629	15.2959	0.774998	0.744383	0.182194	0.0823728	0.0881528	7.25788	0.399601	4.04885	0.336196	0	0	0.77922	0.188688	0	0	0	0
Sol 789	1488	20.7352	0.766433	1.95046	1.45126	2.5149	0.421967	35.1426	1.25033	12.9736	0.670838	2.02412	0.365764	0.298816	0.165465	5.82117	0.228159	3.28785	0.394019	0	0	0.595002	0.149663	0.00545474	0.0156136	0.0381947	0.0465913
Sol 789	1489	25.5626	0.942589	2.63898	1.33692	2.63808	0.424262	21.2644	0.790724	12.8199	0.646627	3.04767	0.539353	0.0473995	0.0610158	6.61755	0.270089	2.7812	0.403831	0.81462	0.274468	0.233681	0.145806	0	0	0.400386	0.1618
Sol 789	1490	32.8256	1.19117	0.698381	0.837323	3.94937	0.377442	15.1061	0.54045	13.4599	0.647199	3.17243	0.394772	0	0	6.52543	0.257272	2.82205	0.402021	1.83833	0.486946	0.141375	0.108264	0	0	0.915961	0.304477
Sol 789	1491	34.7461	1.7825	2.22509	1.3649	2.1969	0.5743	28.3676	1.4223	15.6669	0.762485	0.6835	0.2393	0	0	5.22962	0.293825	3.9064	0.4965	0.405528	0.158578	0.267693	0.150889	0	0	0.3404	0.2324
Sol 789	1492	42.5782	1.56606	1.27972	1.25335	0.835789	0.2333	23.1073	0.831101	17.2857	0.79865	0.213916	0.141985	0.0191837	0.0395856	2.95358	0.404105	3.53734	0.381877	0.0572718	0.0623062	0.232505	0.145097	0	0	0.0244301	0.0335726
Sol 789	1493	48.8718	1.78085	0	0	0.831317	0.22704	12.1314	0.433345	16.1616	0.73283	0.106924	0.0898568	0	0	2.38814	0.393263	3.24977	0.397722	0.168976	0.12318	0.0912164	0.0767268	0.0137511	0.0260879	0.0597309	0.0601926
Sol 789	1494	54.9282	1.98072	0.673243	1.05884	0.913341	0.24041	12.9052	0.46065	15.6663	0.713198	0.0188545	0.0329836	0	0	2.42266	0.534004	3.00654	0.532491	0.144839	0.11073	0.116893	0.0936191	0.00337022	0.0106137	0.0104048	0.0246614
Sol 789	1495	57.7543	2.07184	0	0	0.822175	0.220046	4.67688	0.241607	12.1404	0.570558	0.0252188	0.0387889	0.0330648	0.0454288	2.16146	0.378949	3.04246	0.400956	0.0614286	0.0556407	0.00565302	0.0142285	0.0438277	0.0454259	0.0403289	0.0459984
Sol 789	1496	61.8436	3.25799	0.572304	0.734201	0.91828	0.242434	11.7746	0.429439	14.5894	0.970333	0.0236118	0.0375047	0	0	2.565	0.565624	3.3888	0.553086	0.0459539	0.0484144	0.0838663	0.0783759	0.015	0.0384	0.00762187	0.0199302
Sol 789	1497	37.674	1.39929	0	0	0.835544	0.233409	30.8482	1.57021	16.0907	0.772425	0.221436	0.14272	0.0525244	0.0658869	3.39012	0.455066	3.69643	0.404678	0	0	0.378325	0.192562	0.0105772	0.0245815	0	0
Sol 789	1498	45.5219	1.64819	0	0	0.770931	0.2158	26.0901	0.927172	15.9559	0.743527	0.11868	0.0953036	0.03115	0.0445005	3.86656	0.359195	3.61202	0.375966	0.117266	0.0947784	0.434192	0.151943	0	0	0	0
Sol 789	1499	63.5608	2.28508	0.703245	1.00219	0.584361	0.17769	10.382	0.371377	10.4435	0.522118	0.177173	0.126848	0	0	3.48987	0.386401	2.12946	0.376351	0.0560667	0.054901	0.147578	0.111422	0	0	0.00367001	0.011915
Sol 789	1500	67.8576	2.42835	0.342231	0.745857	0.767321	0.213132	18.3368	0.650757	10.5878	0.535657	0.885275	0.296212	0	0	6.22268	0.24368	1.50425	0.439486	0	0	0.308257	0.231729	0	0	0	0
Sol 789	1501	57.3438	2.07208	0	0	0.7737	0.216727	20.2038	0.721441	15.0316	0.705916	0.783261	0.190793	0.0290368	0.0432079	5.71804	0.225316	1.86563	0.354949	0.0301318	0.0380215	0.37312	0.160174	0	0	0	0
Sol 789	1502	63.6155	2.28316	0.2389	0.664859	0.699234	0.199824	11.6507	0.414666	12.7296	0.60058	0.288098	0.159993	0	0	5.78418	0.227289	1.95755	0.502412	0.0607195	0.057766	0.123318	0.0974581	0	0	0.0238259	0.0354391
Sol 789	1503	79.2232	2.86295	0	0	0.132369	0.133231	8.2356	0.297853	8.39838	0.438484	0.0251318	0.0379117	0	0	4.83833	0.239044	1.26311	0.277524	0	0	0.0868122	0.0740403	0	0	0.00604847	0.0167458
Sol 789	1504	80.848	2.94849	0.76975	0.886697	0.061426	0.0904202	4.21034	0.304064	4.90213	0.343589	0.0235558	0.0368555	0	0	3.88807	0.353784	0.751735	0.187295	0	0	0.0328238	0.0405967	0.0249608	0.054479	0.0199367	0.0328127
Sol 789	1505	35.0822	1.85689	0	0	0.346579	0.181974	25.6406	0.915051	14.5462	0.694742	0.247929	0.149375	0	0	4.285	0.443364	0.8268	0.283518	0	0	0.305708	0.161236	0	0	0	0
Sol 789	1506	47.0442	1.76553	1.09144	1.08807	0.183103	0.146966	19.5496	0.701778	12.4803	0.619746	0.299923	0.16021	0.0354512	0.0484728	3.98419	0.3493	0.892871	0.216202	0	0	0.339163	0.144489	0	0	0	0
Sol 789	1507	59.7385	2.18087	0.427268	0.648716	0.109952	0.121129	10.869	0.38878	9.12371	0.47828	0.468797	0.169891	0.610782	0.15875	3.81605	0.359513	0.903482	0.216109	0	0	0.122446	0.0973164	0	0	0	0
Sol 789	1508	49.1101	1.77447	0.747517	1.00224	0.401786	0.168424	18.3036	0.652376	15.7055	0.719789	0.399861	0.151673	0.285565	0.133303	3.20042	0.634445	0.458789	0.248235	0	0	0.213773	0.138951	0	0	0	0
Sol 789	1509	31.9367	1.18216	0.415413	0.744497	0.699361	0.202622	26.0543	0.933126	25.6008	1.10459	0.263301	0.154469	0.0104917	0.0317274	3.19881	0.476508	0.432149	0.170061	0	0	0.3246	0.155732	0	0	0	0
Sol 789	1510	40.7684	2.13266	0.54495	0.930068	0.852397	0.242107	30.8507	1.584	24.2583	1.21911	0.284667	0.156572	0	0	5.8564	0.330842	1.3299	0.406372	0	0	0.3976	0.225244	0	0	0	0
Sol 789	1511	34.7344	1.27898	0	0	0.58756	0.181087	26.3687	0.943634	21.1064	1.34942	0.112261	0.0919593	0	0	4.0789	0.338363	1.15319	0.25966	0	0	0.273507	0.151769	0.332117	0.163691	0	0
Sol 789	1512	27.9471	1.02104	1.14133	0.834533	0.394017	0.173712	26.8999	1.36641	25.9686	1.10626	0.0939175	0.111794	0	0	3.21396	0.58682	0.766632	0.266638	0	0	0.32649	0.238167	0	0	0	0
Sol 789	1513	24.4842	0.992706	1.2064	1.19369	0.571755	0.209207	24.8728	0.944159	21.1221	1.05694	0.132482	0.108908	0	0	8.27597	0.381397	0.952635	0.240421	0	0	0.316958	0.116051	0	0	0	0
Sol 789	1514	43.3024	1.66586	0.31846	0.63834	0.337213	0.144647	10.2447	0.390879	11.3469	0.62063	0.0690335	0.103395	0	0	5.43702	0.860871	0.526067	0.366683	0	0	0.0789178	0.100257	0	0	0	0
Sol 789	1515	59.1163	2.14275	0.479031	0.772566	0.486346	0.187139	17.3942	0.622768	10.6673	0.551535	0.26761	0.156153	0	0	6.10115	0.341706	1.17038	0.262543	0	0	0.191356	0.131324	0	0	0	0
Sol 789	1516	46.7783	1.74827	0.353926	0.813082	0.883104	0.237473	27.0708	0.972194	15.4868	0.747262	0.400914	0.14749	0.0249819	0.0396476	5.93305	0.236397	1.88466	0.354346	0	0	0.48682	0.1539	0	0	0	0
Sol 789	1517	61.6187	2.34604	0	0	0.776334	0.223507	19.1788	0.716888	12.2909	0.640209	0.454634	0.159385	0	0	4.13933	0.278008	1.90843	0.359302	0.00275295	0.0121546	0.424831	0.154011	0	0	0	0
Sol 789	1518	59.3292	2.26355	0.186577	0.704261	0.607747	0.213222	11.9451	0.446349	11.3212	0.569098	0.449656	0.162685	0	0	5.92317	0.312869	1.15928	0.264094	0.00930538	0.0238096	0.163246	0.160413	0	0	0.0279756	0.0356353
Sol 789	1519	37.5405	1.37529	0.989322	1.0646	0.400059	0.174533	14.8896	0.75182	16.1372	1.02465	0.573321	0.166666	0	0	6.48746	0.257835	0.627136	0.15986	0	0	0.427018	0.151631	0	0	0	0
Sol 789	1520	30.7239	1.13565	0.4257	0.745762	0.354973	0.143853	22.5395	1.14266	24.2874	1.0599	0.27844	0.155252	0	0	5.02169	0.254997	0.538532	0.152391	0	0	0.435997	0.176462	0	0	0	0
Sol 789	1521	38.5757	1.39807	0.5138	0.791218	0.222486	0.174253	27.0807	0.96288	23.9708	1.03352	0.20782	0.138983	0	0	3.23201	0.531014	0.531111	0.136922	0	0	0.387463	0.213742	0	0	0	0
Sol 789	1522	38.3147	2.02116	0.3857	0.77511	0.0874	0.108607	26.943	1.394	24.7923	1.06018	0.2197	0.143615	0	0	3.06485	0.401996	0.62555	0.157864	0	0	0.4033	0.223859	0	0	0	0
Sol 789	1523	31.4859	1.14639	0.320701	0.857156	0.399715	0.187723	28.0997	1.42736	21.833	0.964413	0.325809	0.160937	0.03935	0.0523001	4.78161	0.411288	1.73024	0.338577	0	0	0.462244	0.180653	0	0	0	0
Sol 789	1524	44.1761	1.61277	0.917593	1.23903	0.689242	0.204266	26.0475	0.937037	14.0148	0.686391	1.12477	0.350811	0.776202	0.268695	6.08229	0.244887	2.5658	0.395108	0	0	0.390991	0.16	0	0	0	0
Sol 789	1525	42.659	1.55105	0.328324	0.807342	1.03261	0.262648	21.8813	0.779058	14.1001	0.698514	1.09195	0.247873	0.307115	0.164587	4.36317	0.342497	2.14045	0.373404	0	0	0.326319	0.160267	0	0	0	0
Sol 789	1526	34.5512	1.31478	0	0	1.22578	0.295186	26.5142	0.981087	15.2193	0.768367	0.577708	0.177784	0.0130492	0.0355856	3.57583	0.33216	2.04991	0.361681	0	0	0.370374	0.145563	0	0	0	0
Sol 789	1527	53.7471	2.78338	0.993775	0.914505	1.69714	0.364516	14.467	0.741262	15.1859	0.765113	0.183972	0.131603	0	0	4.1418	0.467192	3.857	0.504419	0.047881	0.0532714	0.1745	0.177009	0.0133	0.0352	0.0721	0.0892011
Sol 789	1528	49.2439	1.82442	0.890821	1.14634	1.22605	0.294252	16.1245	0.592682	12.4373	0.631254	0.284044	0.156998	0	0	3.59076	0.379499	2.88277	0.398981	0.00519263	0.0169525	0.168004	0.121927	0.0837677	0.0717755	0.0631324	0.0590474
Sol 789	1529	53.6387	1.97869	0	0	0.552636	0.200833	9.9276	0.366697	7.63681	0.446511	0.0767948	0.069301	0	0	3.4441	0.336978	1.80194	0.338232	0.00400897	0.0141553	0.258429	0.148071	0.0474416	0.0684342	0.00470584	0.0145098
Sol 789	1530	42.275	1.58129	0.471221	0.840434	1.03062	0.264428	15.6772	0.56598	11.819	0.60471	0.150962	0.114619	0.0687936	0.078998	4.51244	0.31623	3.78269	0.365951	0.0337073	0.0427892	0.311731	0.160254	0	0	0	0
Sol 789	1531	36.2168	1.35444	0	0	1.31	0.309549	25.8031	1.3019	14.81	0.73208	0.33686	0.154755	0	0	5.78427	0.265642	3.14288	0.487085	0.000970486	0.0103178	0.401682	0.148204	0	0	0	0
Sol 789	1532	22.4126	1.16936	0.622718	0.915665	1.20984	0.290393	24.5374	0.87508	12.5499	0.640999	0.438268	0.148329	0	0	16.0686	0.86439	2.31295	0.384214	0	0	0.189396	0.128345	0	0	0	0
Sol 789	1533	22.4649	0.82765	1.3483	0.974137	0.980329	0.252427	20.5222	0.729525	14.5518	0.712461	0.494109	0.141177	0.0717925	0.0701272	20.4029	0.792909	2.21815	0.382793	0.0121931	0.0277076	0.140156	0.107545	0	0	0.0400028	0.0487217
Sol 789	1534	28.6686	1.48453	0.594504	1.32928	1.27566	0.306492	29.6793	1.08657	15.4707	0.778005	0.655255	0.17889	0.095789	0.0988744	13.6674	0.568044	2.56932	0.402679	0	0	0.403672	0.160819	0	0	0.0137895	0.0299123
Sol 789	1535	40.6767	1.47628	0.964096	0.902499	0.99044	0.256048	27.4491	0.974008	13.9968	0.683573	0.806249	0.194455	0	0	6.02412	0.333742	2.15769	0.525753	0	0	0.375214	0.162227	0	0	0	0
Sol 789	1536	24.7834	1.30191	0	0	0.567406	0.194268	36.3327	1.29018	17.2295	0.828905	1.84108	0.348883	0.0182287	0.0380843	4.53309	0.272898	1.16995	0.26238	0	0	0.827581	0.198134	0	0	0	0
Sol 789	1537	20.9801	0.781906	1.14092	1.298	0.699271	0.200744	35.3828	1.26028	17.1073	0.813895	1.40022	0.296085	0.0407154	0.0532209	5.90261	0.255248	1.42639	0.300342	0	0	0.625409	0.15676	0	0	0	0
Sol 789	1538	11.9724	0.539172	0.846935	1.11791	0.701328	0.250776	38.976	1.96598	15.937	1.04	0.635294	0.201134	0	0	11.1425	0.500689	1.9655	0.356531	0	0	0.588803	0.207753	0	0	0	0
Sol 789	1539	13.5561	1.03034	2.62152	1.78727	0.805739	0.393068	41.7815	2.12686	17.5354	1.96666	0.844381	0.268831	0	0	10.3339	0.830821	2.30908	0.456316	0	0	0.617068	0.215664	0	0	0	0
Sol 789	1540	12.3142	0.513037	1.69693	1.03614	0.713357	0.23803	43.9449	1.59436	16.9916	0.867097	0.586492	0.185564	0	0	5.24837	0.341703	2.3204	0.375824	0	0	0.557595	0.166529	0	0	0	0
Sol 789	1541	17.8022	0.671268	0	0	0.951479	0.250347	34.8824	1.78534	16.0406	0.782529	0.479126	0.152072	0.0461743	0.0588306	4.74739	0.268617	2.40795	0.391666	0	0	0.499258	0.143127	0	0	0	0
Sol 789	1542	17.9123	0.668392	0	0	0.604128	0.262151	38.4713	1.37482	15.6913	0.775534	0.485729	0.243487	0	0	3.98722	0.370481	2.34526	0.508465	0	0	0.537131	0.219703	0	0	0	0
Sol 789	1543	14.8411	0.575474	0.760506	1.04558	1.3344	0.311648	41.9049	1.50526	15.7333	0.803242	0.491973	0.153239	0.166925	0.125122	5.56441	0.310635	2.63124	0.402295	0	0	0.88946	0.212808	0	0	0	0
Sol 789	1544	15.2684	0.586771	0	0	1.14538	0.281789	43.6119	1.56232	14.8329	0.76339	0.593236	0.159906	0.105733	0.100434	4.53615	0.28512	2.40585	0.380418	0	0	0.783895	0.193009	0	0	0	0
Sol 789	1545	15.1011	0.57314	1.22551	1.0359	0.85531	0.231625	45.4991	1.62179	10.0723	0.864507	0.515049	0.236124	0	0	4.30653	0.587989	2.00418	0.550929	0	0	0.755041	0.264588	0	0	0	0
Sol 789	1546	16.6245	0.8771	4.4319	2.2053	1.21743	0.471557	44.9677	2.2526	21.1987	1.365	1.3615	0.411	0	0	21.0115	1.1258	2.5309	0.5617	0	0	0.6833	0.2384	0	0	0	0
Sol 789	1547	10.1268	0.404392	3.38939	1.48337	0.640738	0.219417	30.5589	1.11126	10.7653	0.622587	0.729189	0.184563	0	0	27.4613	1.08141	2.30308	0.369336	0	0	0	0	0	0	0	0
Sol 789	1548	38.2181	1.38401	2.23708	1.27434	0.719635	0.206775	22.2383	0.795	13.4959	0.670157	0.876613	0.209592	0.0230374	0.0396648	14.9251	0.575236	1.76746	0.344736	0	0	0.350204	0.159099	0	0	0	0
Sol 789	1549	32.8722	1.19439	0.634027	0.919416	0.802106	0.220833	30.447	1.08077	12.9955	0.65814	0.513894	0.14987	0.0167241	0.0379151	4.93652	0.215095	1.80124	0.347511	0	0	0.457636	0.23426	0	0	0	0
Sol 789	1550	33.1412	1.20359	1.30203	0.95821	0.815651	0.223163	31.3369	1.59021	13.4589	0.676933	0.460487	0.195368	0	0	4.06662	0.456324	1.95629	0.506517	0	0	0.484512	0.181156	0	0	0	0
Sol 789	1551	23.6559	1.23484	0.896295	1.51988	1.12894	0.287085	39.8198	2.00976	13.1533	0.711017	0.775662	0.220515	0.0151055	0.0403717	8.79605	0.382279	2.82261	0.419333	0	0	0.773155	0.262489	0	0	0	0
Sol 789	1552	29.4086	1.52149	0.448428	0.834759	1.28666	0.302007	18.0718	0.644329	13.3766	0.655972	0.967059	0.22587	0.0195565	0.045781	13.8803	0.538864	2.77383	0.403246	0.0573623	0.0530998	0.142385	0.108895	0	0	0.0304805	0.0367329
Sol 789	1553	36.094	1.33935	0.466094	1.2051	0.863426	0.23451	22.5797	0.82377	13.3712	0.664485	0.995489	0.232104	0	0	14.0622	0.558858	1.92875	0.362532	0	0	0.222768	0.142389	0	0	0	0
Sol 789	1554	36.645	1.37566	0	0	1.01465	0.26814	29.452	1.07006	14.7741	0.7546	0.793912	0.195879	0.0711202	0.0810044	5.81761	0.315129	1.95763	0.365066	0	0	0.605125	0.181657	0	0	0	0
Sol 789	1555	34.4533	1.27048	2.33008	1.39732	1.22588	0.294664	30.8904	1.09784	12.9823	0.676059	0.372851	0.159499	0	0	4.69384	0.261612	3.83875	0.35304	0.00223592	0.0117759	0.479608	0.152299	0	0	0	0
Sol 789	1556	35.1116	1.39379	0.28295	0.84708	0.762574	0.213662	21.4368	1.09154	9.72314	0.570424	0.298854	0.156416	0.0262031	0.0404891	4.95347	0.324219	2.78223	0.364252	0	0	0.261828	0.156264	0	0	0	0
Sol 789	1557	42.5505	1.62837	0	0	0.885009	0.243086	20.5509	0.812381	14.0606	0.702682	0.253658	0.139727	0	0	3.90744	0.32996	2.6537	0.3995	0	0	0.209661	0.136005	0.0285263	0.0362531	0.0234765	0.0345445
Sol 789	1558	40.1238	1.57113	0.51755	0.905792	1.14309	0.288283	15.8736	0.609004	13.4689	0.708637	0.365958	0.160882	0	0	4.2025	0.343179	3.39512	0.379476	0.026825	0.0371056	0.18618	0.131567	0	0	0.010229	0.0251997
Sol 789	1559	36.4907	1.37746	1.72346	1.02425	1.37983	0.324993	34.4546	1.27544	14.946	0.777941	0.33086	0.122036	0	0	4.40729	0.343134	3.57322	0.377955	0	0	0.384958	0.155456	0	0	0	0
Sol 789	1560	59.5759	2.13722	0.209112	0.725594	0.484126	0.166817	15.8121	0.7939	9.3998	0.495931	0.3751	0.2299	0.185728	0.134085	4.0524	0.4798	2.0865	0.5271	0	0	0.158	0.1655	0	0	0	0
Sol 789	1561	54.0249	1.94078	1.0544	1.17504	0.360797	0.181188	19.5132	0.984195	10.4395	0.543056	3.29963	0.385667	2.14439	0.379307	5.30374	0.296859	2.50542	0.535916	0	0	0.191942	0.184757	0	0	0	0
Sol 789	1562	24.6655	0.904826	0.621832	1.37844	0.723992	0.220594	36.2676	1.28533	17.6634	0.833094	0.878989	0.208667	0.321914	0.237897	5.85185	0.22947	3.02552	0.401152	0	0	0.535803	0.192691	0	0	0	0
Sol 789	1563	29.0208	1.07963	0.301869	0.790821	0.42955	0.182465	28.4748	1.02301	22.0294	0.998468	0.255909	0.146018	0	0	4.11939	0.316122	1.27968	0.28	0	0	0.386682	0.284354	0	0	0	0
Sol 789	1564	23.8208	0.894746	0	0	0.375369	0.18969	31.6041	1.13253	22.1094	0.998502	0.354241	0.150636	0	0	4.50266	0.303195	1.77437	0.344032	0	0	0.418191	0.231381	0	0	0	0
Sol 789	1565	29.5402	1.5228	1.39637	1.33487	0.785113	0.23541	36.6041	1.8342	21.0888	1.3387	0.5454	0.1964	0.0295467	0.0440292	8.5186	0.4653	2.2988	0.5468	0	0	0.5919	0.2103	0	0	0	0
Sol 789	1566	47.021	1.73769	0.207309	0.7124	0.738204	0.208428	13.558	0.489963	11.0637	0.560135	0.495698	0.146815	0.0545792	0.06652	10.0953	0.397494	1.63291	0.329186	0	0	0.204724	0.13646	0	0	0	0
Sol 789	1567	61.7856	2.28177	0	0	0.165451	0.146216	6.94965	0.354162	7.2298	0.539979	0.178331	0.169471	0	0	5.73652	0.254496	1.36442	0.392694	0	0	0.0727894	0.0636056	0	0	0	0
Sol 789	1568	33.974	1.2598	0.479132	0.991878	1.47106	0.332522	30.5962	1.55436	14.791	0.733939	0.435015	0.17273	0	0	4.05687	0.357781	2.78719	0.509516	0	0	0.361033	0.162432	0	0	0	0
Sol 789	1569	27.1038	0.990493	0	0	4.38479	0.331173	32.6634	1.15782	13.4575	0.67967	1.69932	0.334298	0.0440376	0.0568625	4.24444	0.313022	2.73699	0.401375	0	0	0.384059	0.159643	0	0	0	0
Sol 789	1570	29.6869	1.10657	0	0	1.2795	0.303663	26.4298	1.33437	17.4321	0.842153	0.4579	0.205018	0.0624548	0.0635144	6.0381	0.336316	1.90738	0.360401	0	0	0.314279	0.136138	0	0	0	0
Sol 789	1571	28.5417	1.14533	0.303329	0.727431	0.67598	0.215801	22.1006	0.830605	14.116	1.04704	0.257835	0.112211	0.0327613	0.0468559	7.91198	0.339169	0.610449	0.342739	0	0	0.0923635	0.113793	0	0	0	0
Sol 789	1572	27.7614	1.06561	0	0	0.490627	0.181096	24.417	0.89196	24.3168	1.11243	0.170577	0.119576	0	0	3.23304	0.716748	0.310477	0.273079	0	0	0.326388	0.129561	0	0	0	0
Sol 789	1573	31.2869	1.14825	0.780772	1.43469	0.343644	0.176629	25.8206	0.925655	27.4158	1.1582	0.128564	0.101048	0	0	2.69849	0.39619	0.347064	0.208287	0	0	0.295846	0.15992	0	0	0	0
Sol 789	1574	32.4369	1.2612	0.3861	1.5243	0.249382	0.175913	29.8628	1.4965	28.195	1.25809	0.2747	0.2235	0	0	3.4947	0.5457	0.4814	0.1944	0	0	0.4407	0.2116	0	0	0	0
Sol 789	1575	31.1042	1.19736	0.12875	0.753644	0.406854	0.184717	24.4466	0.903506	23.7778	1.10377	0.296289	0.159231	0	0	3.85912	0.257656	0.517348	0.18359	0	0	0.317892	0.14227	0	0	0	0
Sol 789	1576	31.1163	1.15342	0.19868	0.747984	0.617583	0.186119	25.6767	0.918904	24.8339	1.07641	0.336225	0.165257	0	0	4.08837	0.326598	0.512272	0.184595	0	0	0.357983	0.151059	0	0	0	0
Sol 789	1577	52.3209	1.88	0.347575	0.693318	0.150469	0.143768	19.4043	1.0674	16.9658	0.764334	0.188	0.185948	0.0930919	0.0838216	3.4671	0.553565	0.4281	0.218914	0	0	0.2375	0.210668	0	0	0	0
Sol 789	1578	68.1007	2.46035	0	0	0.199368	0.151255	3.72616	0.638387	4.89966	0.3814	0.134915	0.143365	0.241631	0.145718	3.59577	0.379453	0.436766	0.153726	0	0	0.051378	0.0507633	0	0	0	0
Sol 789	1579	57.4664	2.09931	0	0	0.215546	0.155582	7.1848	0.364399	6.38198	0.375883	0.155625	0.116316	0.0480751	0.0604002	3.40726	0.39131	0.990427	0.336555	0	0	0.115734	0.0942534	0	0	0	0
Sol 789	1580	35.2918	1.31829	1.47876	2.09497	0.827468	0.227073	32.8198	1.16676	14.2149	0.706689	0.244395	0.149075	0.0214966	0.040388	4.45162	0.293659	2.63616	0.637881	0	0	0.40329	0.159527	0	0	0.0341204	0.042776
Sol 789	1581	70.357	2.53777	0	0	0.2212	0.166367	10.1032	0.361372	5.9348	0.357777	0.0778595	0.0689457	0.0473198	0.0602338	4.70809	0.250344	1.55968	0.316543	0	0	0.0911819	0.0764993	0.054121	0.0539428	0.118315	0.095187
Sol 789	1582	74.1749	2.68458	0	0	0.280058	0.178967	6.56482	0.237957	6.06548	0.355598	0.0985156	0.0819918	0.0598027	0.0729791	5.42767	0.251814	1.46933	0.306964	0	0	0.0412993	0.045297	0	0	0.0528113	0.0563184
Sol 789	1583	56.2423	2.07539	1.2642	0.830137	0.62953	0.187035	14.34	0.519912	12.6299	0.632553	0.746581	0.182905	0.0411859	0.0551851	13.5866	0.524484	2.0019	0.366262	0.0163608	0.0324934	0.14758	0.111787	0	0	0.014938	0.0301284
Sol 789	1584	45.3533	1.65019	0.411117	1.04851	0.342135	0.184846	10.684	0.384161	14.2058	0.670905	1.24286	0.273291	0	0	24.9661	0.955941	1.57371	0.323164	0.0265509	0.0346327	0.0947801	0.079626	0	0	0.000855474	0.0130222
Sol 789	1585	56.3136	2.01873	1.55692	1.09385	0.209196	0.149612	13.6581	0.48665	11.2747	0.557264	0.551183	0.140411	0.0164119	0.0374271	19.6102	0.746394	1.28603	0.281263	0	0	0.181885	0.128208	0	0	0	0
Sol 789	1586	69.3269	2.5094	0	0	0.243442	0.162683	8.0865	0.409773	7.45837	0.410122	0.239491	0.149266	0.00441427	0.0232753	4.67526	0.260145	1.21126	0.269231	0.00981949	0.0241523	0.092722	0.0783466	0	0	0	0
Sol 789	1587	56.7162	2.03736	0	0	0.587539	0.176922	10.6566	0.379384	13.1295	0.615207	0.06151	0.0588197	0	0	2.74867	0.399775	2.7485	0.402048	0.130323	0.102427	0.0734685	0.063739	0	0	0.0193734	0.0330776
Sol 789	1588	54.5611	2.7683	0	0	0.789634	0.217941	14.5604	0.7312	15.4646	0.705628	0.0279363	0.0409222	0.0384022	0.0509851	2.33061	0.390235	3.28993	0.396574	0.139109	0.107663	0.0859894	0.0728296	0	0	0.0146761	0.0280504
Sol 789	1589	59.9304	2.15238	0.273432	0.686393	0.735906	0.204119	7.972	0.286265	11.6583	0.55821	0.00326645	0.0112567	0.0173453	0.0377576	2.29325	0.387934	3.07815	0.401201	0.0957147	0.0805681	0.005328	0.0124083	0.0372997	0.0429493	0.053591	0.0507665
Sol 789	1590	59.2345	2.13267	0.297653	0.988023	0.605897	0.180777	9.98012	0.358486	11.9421	0.573866	0.083873	0.0786413	0.0201522	0.0390514	2.17355	0.380161	2.95309	0.400628	0.053523	0.0492416	0.0403	0.0443887	0.00471378	0.013339	0.031533	0.0434319
Sol 789	1591	45.729	1.6603	0	0	0.787886	0.214637	9.80862	0.350185	15.2283	0.693068	0.156521	0.116014	0.0254187	0.0379527	2.62411	0.401064	3.26253	0.392405	0.0820888	0.0713256	0.0781015	0.0670332	0.0194848	0.0324699	0.0268727	0.0393459
Sol 789	1592	47.6695	1.76172	1.02493	1.04012	0.98359	0.251137	8.53791	0.30671	15.1542	0.706929	0.335605	0.250919	0.0561315	0.0586463	3.5069	0.383924	3.22979	0.387013	0.282862	0.142918	0.0508376	0.0503944	0.0204093	0.0332209	0.0527399	0.0549577
Sol 789	1593	46.4863	1.71636	0.956381	0.755155	1.58948	0.343796	7.29509	0.263185	14.7967	0.695733	0.97538	0.228124	0.0297068	0.0422283	3.87435	0.362203	2.93061	0.396227	0.302857	0.208012	0.0466327	0.0486399	0.0107445	0.0211085	0.0751924	0.0704137
Sol 789	1594	36.1183	1.34278	0.921386	1.16853	0.834831	0.22971	12.0848	0.61592	14.8103	0.695596	0.213997	0.142688	0	0	3.66865	0.394604	3.3568	0.438658	0.16391	0.121055	0.128347	0.100933	0	0	0.020725	0.0336274
Sol 789	1595	16.168	0.8562	0.77847	1.0473	1.05071	0.269966	40.376	1.4334	13.7483	0.707361	0.587907	0.148571	0	0	5.61928	0.22078	4.65817	0.254054	0	0	0.564408	0.143132	0	0	0	0
Sol 789	1596	12.0719	0.654308	3.07678	1.69818	0.686172	0.208462	48.1585	1.70648	12.9915	0.69363	0.579331	0.147024	0	0	6.10195	0.238943	4.63899	0.320946	0	0	0.703371	0.172985	0	0	0	0
Sol 789	1597	19.3967	0.729376	0.72058	1.13538	0.955674	0.255405	44.6033	1.5858	14.3659	0.739975	0.42936	0.147861	0	0	6.02429	0.23891	4.36192	0.290751	0	0	0.656655	0.163235	0.228894	0.208362	0	0
Sol 789	1598	17.1479	0.664477	0	0	0.84053	0.238974	43.8497	1.57153	15.6162	0.800671	0.456308	0.157284	0.0554371	0.0676198	7.72623	0.306069	4.43799	0.299221	0	0	0.622389	0.156372	0.538974	0.173982	0	0
Sol 789	1599	12.2922	0.511177	3.64935	1.85082	0.681243	0.245995	46.9839	2.42359	14.83	0.826977	0.45094	0.162598	0.0669609	0.0787258	7.126	0.295221	4.71796	0.255967	0	0	0.669993	0.193386	0	0	0	0
Sol 789	1600	12.5974	0.542585	2.22949	1.79204	0.953334	0.27655	52.4197	1.938	14.157	0.846809	0.554619	0.183946	0	0	6.43628	0.362694	4.82298	0.345983	0	0	0.827677	0.205101	0	0	0	0
Sol 789	1601	15.5896	0.643198	0	0	1.3069	0.322778	51.5762	2.59602	15.6303	0.864774	0.620094	0.200843	0.0536465	0.0682434	6.56635	0.383402	4.79522	0.351619	0	0	0.791208	0.268175	0.658148	0.205599	0	0
Sol 789	1602	21.3178	0.821251	1.00012	1.38745	0.947168	0.261675	30.5397	1.56942	10.9358	0.946007	0.15035	0.173872	0	0	4.28283	0.786908	2.95471	0.736283	0	0	0.384997	0.139623	1.30303	0.281432	0	0
Sol 789	1603	17.5635	0.710565	2.82178	1.66786	0.76374	0.257054	43.683	2.20815	13.1325	0.734069	0.467818	0.165414	0.0654226	0.0770017	5.09102	0.346677	4.0772	0.335447	0	0	0.574607	0.177477	0	0	0	0
Sol 789	1604	12.7253	0.546991	1.07978	1.23473	0.478508	0.197468	48.2582	1.79664	12.7518	0.740416	0.363422	0.142739	0	0	4.39438	0.332022	4.43185	0.324315	0	0	0.632883	0.170437	0	0	0	0
Sol 789	1605	28.8283	1.49432	0.669825	0.922749	1.05283	0.266564	16.9428	0.617293	14.3888	0.978272	0.336349	0.163537	0.00973281	0.0298134	4.78969	0.308612	3.37731	0.391178	0.0186427	0.0471382	0.217528	0.139836	0	0	0	0
Sol 789	1606	40.6678	1.49516	0.805094	0.736215	4.36439	0.332381	7.73083	0.281862	10.7527	0.539412	2.16944	0.377559	0.109326	0.094089	4.34256	0.302947	2.14701	0.372273	0.267245	0.214464	0.0442157	0.0670942	0	0	0.0115231	0.0232497
Sol 789	1607	37.1316	1.95477	0.186496	0.811409	2.51827	0.418285	18.9933	0.677129	14.4763	0.693852	0.728293	0.178684	0.0474389	0.0604124	4.56849	0.279765	3.07662	0.392774	0.157975	0.117734	0.212241	0.140439	0	0	0	0
Sol 789	1608	28.6698	1.05974	1.66334	1.4117	0.890897	0.23914	34.3351	1.22353	14.8152	0.733439	0.278709	0.235319	0.193014	0.137291	3.1957	0.39999	3.7528	0.362331	0	0	0.408631	0.154641	0	0	0	0
Sol 789	1609	60.4147	2.17674	0	0	0.651	0.190847	20.5095	0.73203	11.2484	0.568565	0.239416	0.21827	0.0893385	0.0823321	2.72504	0.402536	2.49441	0.392911	0	0	0.174072	0.123705	0	0	0	0
Sol 789	1610	62.5927	2.24378	0	0	0.754057	0.206681	7.73775	0.276166	8.7284	0.455689	0.261217	0.151993	0.0157326	0.0401675	2.56136	0.398868	2.82736	0.401179	0.0466813	0.0492303	0	0	0.0250624	0.0365109	0.00922257	0.0225828
Sol 789	1611	57.8648	2.0769	0	0	0.86103	0.228264	12.552	0.6308	11.8885	0.573247	0.211476	0.141031	0.0599996	0.0712154	2.45218	0.396016	3.23395	0.397826	0.0870723	0.0745379	0.0211617	0.0343528	0.00733277	0.0188844	0.0109641	0.0253985
Sol 789	1612	60.2741	3.15948	0	0	0.624468	0.184187	13.75	0.488419	11.247	0.551332	0.0892808	0.0758361	0.00519022	0.0238458	2.60585	0.39904	2.36587	0.389687	0.0673489	0.0649303	0.0791975	0.067908	0.00513398	0.0143054	0	0
Sol 789	1613	61.0479	2.20213	0	0	0.40138	0.180141	9.79094	0.350026	8.62991	0.453282	0.237141	0.201229	0.0512578	0.0636464	5.51148	0.2172	1.3584	0.29186	0.0104448	0.0231629	0.105879	0.086407	0	0	0.0123333	0.0271233
Sol 789	1614	45.2697	1.63137	0.402593	0.741157	0.393826	0.184615	19.8879	0.713156	13.6376	0.652293	0.651737	0.162351	0.0787319	0.0765459	16.1722	0.618424	1.46106	0.306989	0	0	0.270052	0.152847	0	0	0	0
Sol 789	1615	30.6387	1.12676	1.44104	1.22791	0.443206	0.179201	19.9493	1.0008	19.4228	0.866549	0.695	0.2425	0	0	30.7252	1.6399	1.52494	0.317411	0	0	0.2855	0.2258	0	0	0	0
Sol 789	1616	48.1909	1.77486	0	0	0.602498	0.210134	21.8344	1.10791	14.5549	0.697645	0.521323	0.165695	0.0495818	0.063209	11.4173	0.623502	1.68945	0.337653	0	0	0.351909	0.201824	0	0	0.00655106	0.0226059
Sol 789	1617	60.9981	3.09741	0.409129	0.669448	0.538965	0.164328	9.78827	0.348813	8.44413	0.44573	0.167831	0.120982	0.0823297	0.0887054	3.88387	0.567105	1.8721	0.515723	0	0	0.0888305	0.0756075	0	0	0.100481	0.0834497
Sol 789	1618	67.0653	3.49236	0.0499813	0.661452	0.351666	0.155667	9.1599	0.475003	6.48794	0.37491	0.12856	0.101025	0.00693195	0.0280271	4.23686	0.316908	1.62933	0.46198	0	0	0.0863324	0.0732575	0.0407322	0.0441215	0.0737	0.0906016
Sol 789	1619	38.9534	1.43085	0	0	1.0517	0.265707	29.2809	1.03857	14.1091	0.68579	0.209229	0.139998	0.047053	0.0595915	4.38705	0.298128	3.1381	0.634842	0	0	0.276724	0.155687	0	0	0	0
Sol 789	1620	71.5786	3.6156	0	0	0.293644	0.188977	7.8476	0.3953	7.1019	0.5546	0.2643	0.2207	0.0373901	0.0531803	4.0874	0.4742	2.1056	0.5288	0	0	0.1121	0.1278	0	0	0	0
Sol 789	1621	60.1289	2.15497	0	0	0.74291	0.205449	12.4229	0.627284	5.6308	0.50359	0.214299	0.197705	0.0637228	0.0741293	4.27754	0.312169	0.802177	0.194857	0	0	0.18392	0.180817	0	0	0	0
Sol 789	1622	38.4704	1.46242	1.35597	1.09544	0.447512	0.179922	25.227	0.934507	21.7869	1.00364	0.192489	0.178494	0.0167423	0.0538212	3.52902	0.429983	0.505581	0.182702	0	0	0.335909	0.201154	0	0	0	0
Sol 789	1623	28.4874	1.06924	0.590904	0.705105	0.372989	0.186899	23.3531	0.843583	24.0835	1.06208	0.195079	0.183151	0	0	2.8308	0.522041	0.345909	0.211897	0	0	0.338937	0.139746	0	0	0	0
Sol 789	1624	27.5486	1.01231	1.57285	1.08594	0.776863	0.216019	22.0744	0.783374	23.1977	1.00212	0.253548	0.203937	0.0350837	0.0473304	4.85361	0.272389	0.473169	0.172853	0	0	0.317041	0.15316	0	0	0	0
Sol 789	1625	27.2293	1.01944	0.423079	0.935803	0.504261	0.190273	21.1894	0.760195	22.5479	0.991958	0.324482	0.162133	0	0	4.39774	0.295643	0.453285	0.146497	0	0	0.259174	0.154092	0	0	0	0
Sol 789	1626	26.7689	0.98395	0.617092	1.24739	0.494253	0.162105	17.9007	0.906953	21.4129	0.939962	0.28578	0.159675	0.0343144	0.0457916	4.74288	0.267324	0.532646	0.192155	0	0	0.217169	0.141785	0	0	0	0
Sol 789	1627	25.4124	0.944785	0.0967736	1.73776	0.387931	0.166365	19.0432	0.682639	19.5389	0.883265	0.0819832	0.101944	0	0	2.73915	0.65416	0.361754	0.275367	0	0	0.151896	0.168513	0	0	0	0
Sol 789	1628	23.8455	1.10869	0	0	0.468963	0.18918	20.5075	0.86265	21.6656	1.46694	0.157123	0.120864	0.0690062	0.0801458	4.79574	0.344579	0.468792	0.443496	0	0	0	0	0	0	0	0
Sol 789	1629	40.3936	2.06751	1.30558	1.46568	0.472341	0.213934	32.276	1.61898	28.7454	1.79671	0.30019	0.112549	0.0470048	0.0641452	6.15247	0.340248	0.902008	0.260768	0	0	0.507471	0.168975	0	0	0	0
Sol 789	1630	22.8267	0.881299	1.23549	1.25955	2.10347	0.53446	24.9537	1.25736	12.8501	0.673684	1.95385	0.315719	0.0919865	0.097772	3.90803	0.336187	1.82087	0.421911	0	0	0.299276	0.140389	0	0	0	0
Sol 789	1631	17.1561	0.907612	1.86738	1.41928	1.56695	0.342375	38.4696	1.3637	12.0743	0.92521	0.492688	0.206254	0.061203	0.0714806	3.0042	0.595436	3.04705	0.592727	0	0	0.406329	0.15738	0	0	0	0
Sol 789	1632	35.8972	1.85477	1.69781	0.951441	0.647342	0.192933	24.8842	1.26053	11.2009	0.589087	0.3771	0.229716	0.0491317	0.0626023	6.28009	0.252366	2.79267	0.518209	0	0	0.2762	0.223709	0	0	0	0
Sol 789	1633	45.6677	1.6625	0.603095	0.728709	0.562157	0.198428	11.1499	0.398985	9.3519	0.49006	0.414543	0.154334	0.0231225	0.045259	10.0366	0.38927	1.63281	0.329037	0.0476775	0.0487248	0.121464	0.0964287	0	0	0	0
Sol 789	1634	33.0658	1.25696	0.544588	1.11673	0.802829	0.221276	16.3912	0.608839	12.3475	0.627891	0.621242	0.158503	0.0693284	0.0761651	11.5346	0.62957	2.33114	0.391036	0.000259757	0.0100266	0.222319	0.14352	0	0	0	0
Sol 789	1635	24.1501	0.979557	1.59878	1.50954	0.858408	0.24441	35.3327	1.80013	15.5142	1.04176	0.504045	0.180255	0	0	6.05777	0.370595	2.86355	0.43531	0	0	0.516916	0.183626	0	0	0	0
Sol 789	1636	29.764	1.09024	2.7607	1.44394	0.676965	0.202383	34.0349	1.20726	18.8907	0.878553	0.355612	0.14774	0	0	3.5896	0.371247	2.86024	0.402947	0	0	0.44907	0.23616	0	0	0	0
Sol 789	1637	27.6566	1.02029	0.480632	0.896623	1.08246	0.272334	31.3175	1.11569	19.0123	0.889465	0.363434	0.162524	0	0	4.51658	0.284327	2.48446	0.392819	0	0	0.440021	0.233093	0	0	0	0
Sol 789	1638	32.8656	1.19498	2.05203	1.48709	0.701104	0.209996	39.7298	2.03446	15.3744	0.755787	0.8756	0.294345	0.0485766	0.0601603	5.00236	0.217707	3.4192	0.388228	0	0	0.628995	0.156912	0	0	0	0
Sol 789	1639	68.8937	2.46362	1.31249	0.779825	0.21178	0.165889	10.2369	0.618014	7.34135	0.41409	0.5164	0.187793	0.0468814	0.0577191	3.3919	0.565359	1.681	0.475325	0	0	0.0886	0.105442	0	0	0	0
Sol 789	1640	39.6581	2.08022	0.831058	1.05605	0.720324	0.209095	37.1162	1.32028	11.438	0.609715	0.43391	0.151822	0	0	5.17384	0.211616	3.28687	0.396488	0	0	0.509827	0.154358	0	0	0	0
Sol 789	1641	31.0456	1.5978	1.5566	1.02618	1.0978	0.388	37.9458	1.9016	15.1843	1.0481	0.41625	0.153139	0.0537961	0.0631167	4.67941	0.306036	3.5716	0.5358	0	0	0.542835	0.163961	0	0	0	0
Sol 789	1642	33.2989	1.7096	0.615082	0.924473	0.9815	0.3594	25.98	1.3028	19.6597	1.2469	0.273294	0.149482	0	0	4.1618	0.4619	2.5782	0.405008	0	0	0.4659	0.2004	0	0	0	0
Sol 789	1643	40.032	2.0443	0	0	0.972796	0.331029	20.3393	1.0206	17.171	1.1066	0.465675	0.160974	0.0358285	0.0548212	7.5528	0.4148	2.9212	0.5692	0	0	0.3784	0.229	0.0266	0.0563	0.0524	0.0682
Sol 789	1644	30.6734	1.2195	0	0	0.878191	0.26205	24.1399	1.22398	11.7773	0.649824	0.43343	0.157369	0.103389	0.0935649	6.08332	0.349502	3.21457	0.395022	0.0149774	0.0320341	0.253452	0.155778	0	0	0	0
Sol 789	1645	22.949	0.895551	1.9983	1.53385	1.02141	0.268933	39.3354	1.98349	12.7202	0.707179	0.617399	0.188791	0.018448	0.0405549	5.90921	0.312874	3.37064	0.392035	0	0	0.459031	0.159768	0	0	0	0
Sol 789	1646	26.5075	1.0941	1.60963	1.43289	1.51569	0.349173	26.2084	1.03858	15.7989	0.842362	0.915387	0.241587	0.154839	0.167346	12.9779	0.553566	2.28229	0.514202	0	0	0.558157	0.184412	0	0	0	0
Sol 789	1647	33.0168	1.21229	3.06016	1.25162	1.26558	0.298765	15.4209	0.552764	13.4223	0.652898	1.06851	0.243999	0.148838	0.116975	13.4096	0.515006	2.31178	0.388506	0.0832882	0.0719449	0.263171	0.142717	0	0	0	0
Sol 789	1648	29.125	1.50325	4.77987	1.45689	1.4362	0.339214	23.6502	1.18933	15.9079	1.06608	0.943666	0.249136	0	0	10.7765	0.473144	2.49205	0.50224	0.0512146	0.0671656	0.387655	0.143313	0	0	0.0089	0.0289
Sol 789	1649	29.6867	1.53793	1.67601	1.07669	1.46306	0.333177	33.3182	1.22937	15.4268	0.791286	0.83566	0.231527	0.0223112	0.0424025	7.50397	0.405196	2.45648	0.395056	0.00115916	0.0112755	0.558223	0.175343	0	0	0	0
Sol 789	1650	26.7835	0.983977	2.51262	1.32713	1.46069	0.32913	31.3599	1.1284	18.6611	0.880907	0.487389	0.153262	0	0	7.20234	0.283655	1.50912	0.314027	0	0	0.445779	0.152125	0	0	1.0613	0.342325
Sol 789	1651	30.0586	1.56129	0.631365	1.2513	1.35568	0.315992	31.4826	1.1256	20.4075	0.930686	0.555208	0.150752	0	0	7.43473	0.290954	1.58542	0.32376	0	0	0.545815	0.155663	0	0	0.0730077	0.0787568
Sol 789	1652	25.4089	1.32156	0.623532	1.24438	1.26795	0.295954	28.8977	1.02445	16.9315	0.791639	1.1284	0.359056	0.0428405	0.0562378	16.4034	0.624041	1.87719	0.354026	0	0	0.310831	0.16268	0	0	0	0
Sol 789	1653	25.906	1.36229	2.06025	1.31706	1.1772	0.403499	20.624	1.05558	15.2398	1.03374	0.7972	0.272419	0.0504434	0.0647718	14.3567	0.59052	1.9209	0.508071	0.0128	0.0374002	0.175547	0.127632	0	0	0	0
Sol 789	1654	29.2699	1.5082	0	0	1.2258	0.4164	23.3976	1.0944	20.3673	1.2875	0.488194	0.168699	0	0	5.19701	0.402946	1.9565	0.5127	0	0	0.279603	0.14828	0	0	0	0
Sol 789	1655	29.9997	1.55697	1.69651	1.34633	1.3168	0.438644	33.6901	1.70186	17.1053	0.822545	0.394343	0.148259	0.0559299	0.0692945	4.85945	0.357101	1.97106	0.455076	0.0020603	0.0117278	0.387298	0.145187	0	0	0	0
Sol 789	1656	22.3839	1.20955	0.5458	1.75872	1.79499	0.366558	28.3022	1.00368	16.93	0.800924	0.391474	0.154661	0.137944	0.110868	8.00665	0.311115	2.2348	0.54343	0	0	0.373754	0.157919	0	0	0.0160307	0.0299221
Sol 789	1657	40.6665	1.54287	0	0	2.30421	0.388756	18.9558	0.692926	17.8883	0.837857	0.213706	0.140744	0.166451	0.125864	5.15254	0.288098	2.85001	0.487023	0.0301364	0.0387546	0.129324	0.101973	0.0290221	0.0418043	0.18543	0.127117
Sol 789	1658	41.7509	1.59463	0	0	2.15199	0.386669	18.0141	0.66308	17.3435	0.810211	0.160833	0.120059	0.169429	0.1284	3.29324	0.449207	2.77663	0.488952	0.0497208	0.0490535	0.0819158	0.0739027	0	0	0.0221621	0.0345443
Sol 789	1659	42.3216	1.5619	0.779095	0.775456	1.34901	0.307935	15.2396	0.544974	11.9666	0.86626	0.174979	0.125125	0.114102	0.0993045	2.63151	0.550046	2.56408	0.397611	0.129314	0.101912	0.0665702	0.058415	0	0	0.0156312	0.0306133
Sol 789	1660	44.9717	1.66881	0	0	1.41039	0.320031	16.243	0.584012	15.1201	0.724203	0.96367	0.224852	0.173713	0.127389	5.00621	0.285192	2.75459	0.397843	0.1904	0.132972	0.0761232	0.06653	0	0	0.00821262	0.0211826
Sol 789	1661	40.3049	1.49314	0	0	1.95789	0.383148	18.4203	0.665266	16.256	0.754096	1.83602	0.349862	0.0955128	0.0926034	8.74456	0.339438	2.7426	0.396678	0.0412432	0.0471614	0.128802	0.101337	0	0	0.0866824	0.0740217
Sol 789	1662	41.3468	1.52251	0.396046	0.837967	2.67695	0.420055	19.539	0.702627	17.6717	0.805576	0.303406	0.16269	0.0641319	0.0747779	4.46949	0.283898	2.85001	0.400406	0	0	0.215799	0.141403	0	0	0.183821	0.130079
Sol 789	1663	37.4969	1.35733	0.463029	0.829851	2.71865	0.425048	21.4909	0.763723	16.2531	0.754396	0.285716	0.222601	0.0191043	0.0386086	4.4839	0.370963	2.71602	0.400928	0	0	0.175285	0.12556	0	0	1.76769	0.341196
Sol 789	1664	34.6295	1.77987	0	0	1.64516	0.354718	17.0226	0.675315	14.0205	0.708113	1.54656	0.308315	0.11203	0.0978951	12.3321	0.558284	1.89855	0.361064	0.082782	0.0850786	0.244582	0.134453	0	0	0.1887	0.186501
Sol 789	1665	35.9369	1.94657	0	0	0.849392	0.225745	7.6996	0.412535	8.1277	0.643596	0.859	0.290018	0	0	11.8327	0.67566	1.25803	0.277067	0.0644446	0.0577316	0.118997	0.0958263	0	0	0	0
Sol 789	1666	39.5724	1.45537	0.60222	0.773726	0.86396	0.232835	11.1867	0.403349	10.5289	0.547722	0.542995	0.162209	0.0717771	0.0798737	9.49652	0.381619	1.59614	0.322864	0.02772	0.0359333	0.0939417	0.0812666	0	0	0.00821918	0.0212287
Sol 789	1667	29.8805	1.16993	1.59448	1.33106	0.745403	0.231566	25.7204	1.3019	11.9106	0.63429	0.609895	0.213377	0.0208616	0.0409082	6.90827	0.298573	2.2679	0.380267	0	0	0.328185	0.165793	0	0	0	0
Sol 789	1668	22.4336	0.828257	0.37772	1.06722	0.822934	0.229379	43.2618	1.53392	12.7606	0.687782	0.525905	0.193904	0.0187441	0.0392294	4.45951	0.284776	3.3664	0.381741	0	0	0.541407	0.193421	0	0	0	0
Sol 789	1669	28.3703	1.03938	0	0	1.31114	0.308723	40.2028	1.42548	13.7319	0.698242	0.506783	0.132043	0	0	4.15246	0.322933	3.24548	0.39446	0	0	0.500873	0.135929	0	0	0	0
Sol 789	1670	20.0007	0.741452	0	0	1.3412	0.312984	39.5509	1.40873	13.4612	0.698609	0.593	0.21216	0	0	4.6635	0.384485	2.78389	0.398869	0	0	0.608497	0.173942	0	0	0	0
Sol 789	1671	14.1806	0.761354	0	0	0.753681	0.212939	42.1657	1.49505	20.5579	0.949234	0.456876	0.153245	0	0	3.28048	0.39539	1.96828	0.362195	0	0	0.465681	0.219466	0	0	0	0
Sol 789	1672	19.5133	0.72454	1.49349	1.03419	0.777144	0.220429	41.2213	1.46056	21.1445	0.964986	0.372197	0.16227	0	0	2.74247	0.402913	1.85104	0.500773	0	0	0.524706	0.145837	0	0	0	0
Sol 789	1673	29.1571	1.09876	0.844995	1.07432	0.937594	0.255472	42.1284	2.13371	16.4953	0.823207	0.499635	0.164034	0	0	4.18847	0.338445	3.47089	0.381046	0	0	0.62379	0.168799	0	0	0.00136951	0.00958656
Sol 789	1674	30.2726	1.13234	1.76232	1.0635	0.698945	0.209642	33.2877	1.18857	14.4896	0.72016	0.25828	0.227897	0.042676	0.0562345	4.83428	0.250511	3.58979	0.377469	0	0	0.436105	0.148722	0.00659739	0.017743	0.0399455	0.0470532
Sol 789	1675	29.4777	1.53362	1.11568	1.08169	0.85097	0.236696	38.4815	1.36787	15.9664	0.774199	0.308312	0.163431	0.0369038	0.0505702	5.32812	0.216944	3.91597	0.352305	0	0	0.593157	0.149677	0	0	0	0
Sol 789	1676	24.2649	1.38803	0.729235	1.02816	1.99109	0.39165	43.8136	2.4333	14.4341	0.731281	0.743762	0.182759	0	0	4.8165	0.239369	3.9071	0.504855	0	0	0.6705	0.235149	0	0	0	0
Sol 789	1677	16.9874	0.634756	0.989051	1.02971	1.21653	0.294136	42.7025	1.51316	18.9811	0.893474	0.492094	0.138044	0.0708617	0.0685289	3.37732	0.535526	2.68226	0.554149	0	0	0.662186	0.232831	0	0	0	0
Sol 789	1678	16.6859	0.63545	2.59149	1.3422	0.989634	0.255189	36.8838	1.31307	22.4213	1.01209	0.488993	0.146774	0	0	3.56024	0.373076	1.25311	0.275903	0	0	0.821941	0.198092	0	0	0	0
Sol 789	1679	35.2454	1.30201	0.539954	0.769656	0.889719	0.234224	16.647	0.603997	12.9481	0.635604	0.476714	0.144164	0.0690667	0.0780319	7.76581	0.301554	2.02041	0.366985	0	0	0.192788	0.132771	0	0	0	0
Sol 789	1680	33.8204	1.25522	0.360222	0.74613	0.68469	0.214533	14.7819	0.534931	11.8757	0.611531	0.556068	0.162518	0.0651947	0.0757872	6.27036	0.352769	1.8286	0.344529	0.0119887	0.0275245	0.15059	0.11321	0	0	0	0
Sol 789	1681	33.4475	1.7132	0	0	1.2575	0.4197	17.7531	0.8911	17.6103	1.1177	0.8797	0.2953	0.2599	0.2244	15.1473	0.8157	1.8081	0.4922	0	0	0.2485	0.215	0	0	0.0197	0.048
Sol 789	1682	33.1004	1.69996	0.550664	1.52736	0.651672	0.371855	29.0127	1.45425	28.8001	1.70054	0.479074	0.230284	0.0323893	0.0604041	5.53867	1.90116	1.07937	0.334134	0	0	0.427591	0.173187	0	0	0	0
Sol 789	1683	28.3729	1.10907	0.136377	0.597137	0.483297	0.18548	20.3372	1.03948	24.8426	1.16292	0	0	0	0	0.862312	0.309534	0.213149	0.229543	0	0	0.10382	0.127313	0	0	0	0
Sol 789	1684	35.4244	1.38461	0	0	0.376612	0.162028	28.2943	1.04095	31.4257	1.40815	0.200707	0.110317	0	0	1.84851	0.335251	0.191088	0.215536	0	0	0.248418	0.240154	0	0	0	0
Sol 789	1685	32.718	1.34879	0	0	0.223881	0.153122	24.3252	0.942965	28.203	1.35211	0.076699	0.0826397	0	0	1.42493	0.305396	0.121027	0.148069	0	0	0.338208	0.11674	0	0	0	0
Sol 789	1686	29.7079	1.53505	0.5978	1.04738	0.0703602	0.100236	26.1974	0.929261	25.4022	1.54592	0.110034	0.0933241	0	0	1.77375	0.499546	0.341787	0.246635	0	0	0.227752	0.212477	0	0	0	0
Sol 789	1687	32.2409	1.18026	1.07757	1.11198	0.422727	0.184939	25.7565	0.92019	26.8662	1.1418	0.179791	0.127836	0	0	2.86206	0.404386	0.662394	0.16634	0	0	0.268278	0.154282	0	0	0	0
Sol 789	1688	34.1757	1.78093	0.989011	1.06128	1.48263	0.328202	19.428	0.691639	20.7694	0.909009	0.391286	0.161753	0.00685475	0.0263684	4.60537	0.272095	1.14022	0.360031	0	0	0.217329	0.142896	0	0	0.0351274	0.0433866
Sol 789	1689	33.9696	1.23148	0.586499	0.735383	1.59497	0.34365	20.3304	0.721652	20.7083	0.902919	0.581641	0.147199	0.0250181	0.0469959	5.52702	0.217211	1.51821	0.313322	0	0	0.236017	0.145963	0	0	0.0259085	0.0555464
Sol 789	1690	33.3414	1.7108	0.656234	0.803122	1.0548	0.3754	26.3231	1.3196	22.5794	1.3836	0.3165	0.2311	0.0139508	0.0341583	4.8796	0.3092	1.1457	0.3645	0	0	0.3302	0.2315	0	0	0	0
Sol 789	1691	30.6453	1.11474	0.30816	0.713188	0.830888	0.225346	22.8351	1.16021	21.5407	0.942131	0.188714	0.184527	0	0	4.1282	0.439071	0.77758	0.2672	0	0	0.225123	0.207893	0	0	0	0
Sol 789	1692	34.2738	1.24557	1.02786	1.10679	0.861558	0.23045	20.554	1.03675	17.3989	0.790193	0.515586	0.141729	0.071754	0.0736904	8.53271	0.330469	1.41487	0.298771	0	0	0.276325	0.158117	0	0	0	0
Sol 789	1693	48.6533	1.8138	0.544939	0.761891	0.748196	0.229212	17.378	0.630148	9.06729	0.488027	0.387555	0.161804	0.0741801	0.0747018	7.77085	0.304014	1.64224	0.330374	0	0	0.169681	0.163951	0	0	0	0
Sol 789	1694	22.9994	1.19521	0	0	0.802387	0.221618	38.0049	1.34745	14.4581	0.714989	0.291374	0.223414	0.06939	0.0787193	4.53415	0.275741	2.68903	0.558007	0	0	0.427551	0.225563	0	0	0	0
Sol 789	1695	43.0413	1.56242	0	0	0.782949	0.217207	21.7392	0.771375	11.0099	0.56232	0.254318	0.153691	0.113647	0.0994632	4.80129	0.232625	2.4492	0.392736	0	0	0.2714	0.22232	0	0	0	0
Sol 789	1696	54.4665	1.98986	0	0	1.5515	0.334907	8.28721	0.299407	10.7774	0.535603	0.394138	0.159189	0.0605162	0.0640577	4.39521	0.310705	2.38822	0.391643	0.0826683	0.0729195	0.0871556	0.0738876	0	0	0.11063	0.0900551
Sol 789	1697	36.3508	1.33336	0.571658	1.18391	1.42612	0.323303	24.8661	0.885471	17.8964	0.818659	0.500302	0.1409	0.0805177	0.076209	5.54096	0.218934	2.45557	0.39663	0	0	0.339681	0.159412	0	0	0.0484494	0.057273
Sol 789	1698	30.9169	1.12782	2.02763	1.36366	0.818849	0.228537	33.0611	1.1735	20.1935	0.9097	0.383728	0.248616	0.364484	0.255306	7.96921	0.308428	2.19804	0.51612	0	0	0.49184	0.13177	0	0	0	0
Sol 789	1699	25.6115	0.964542	0.60708	0.882798	0.733234	0.209194	35.2707	1.79742	19.9291	0.922388	0.588729	0.18069	0.731054	0.198895	6.8054	0.37826	1.60842	0.438404	0	0	0.486338	0.147695	0	0	0	0
Sol 789	1700	37.9259	1.94	0.279113	1.22123	0.613167	0.18739	30.939	1.5506	16.7977	0.805466	0.4598	0.204	0.438846	0.161025	5.6561	0.3139	1.4937	0.439	0	0	0.3848	0.2279	0	0	0	0
Sol 789	1701	54.8142	1.97277	0.320117	0.705004	0.763748	0.212905	12.4711	0.445934	10.9618	0.544152	0.193273	0.133569	0.129778	0.106374	3.42335	0.389767	1.81951	0.476649	0	0	0.101464	0.117676	0.0937034	0.110257	0	0
Sol 789	1702	66.6618	2.38716	0	0	0.738004	0.205585	14.2636	0.510017	9.56162	0.491265	0.336856	0.164114	0.0469532	0.0578178	3.26976	0.396745	1.98422	0.364225	0.0166124	0.0314952	0.114733	0.0920822	0	0	0	0
Sol 789	1703	65.0323	2.32796	0	0	0.968406	0.246565	10.3208	0.367551	6.28066	0.517874	0.90582	0.213743	0.160342	0.122836	3.97428	0.346496	2.00712	0.366367	0.00115031	0.00880238	0.0379215	0.0430063	0.00155111	0.00650467	0.0247181	0.0379479
Sol 789	1704	64.095	2.30184	1.76166	1.06396	0.818798	0.220513	11.5613	0.413647	8.46195	0.452107	0.312943	0.243677	0.219662	0.147298	3.97233	0.562498	2.48825	0.394338	0	0	0.0292332	0.0411238	0.00750349	0.016691	0	0
Sol 789	1705	47.3926	2.45058	0.789505	0.746751	0.693189	0.196088	9.66118	0.344455	8.19566	0.442757	0.3904	0.227244	0.0701741	0.0687718	4.64146	0.260499	2.15802	0.377953	0.0060181	0.0176067	0.0484847	0.050432	0	0	0.0036	0.0165
Sol 789	1706	47.2238	2.06035	0.408271	0.670639	0.603373	0.191191	8.05497	0.312001	7.16123	0.422313	0.150061	0.114732	0.0171227	0.0386852	3.84795	0.319579	1.6114	0.328857	0.0172324	0.0332612	0.0753227	0.0740046	0	0	0.00236143	0.00949825
Sol 789	1707	60.0148	2.46586	1.88481	0.981601	0.788432	0.225724	10.3421	0.534598	7.83818	0.64957	0.601335	0.201454	0	0	4.44478	0.355527	2.28864	0.246878	0	0	0.129626	0.116008	0	0	0	0
Sol 789	1708	30.9477	1.29003	3.02635	1.23891	0.52405	0.1972	22.6879	0.893643	6.33141	1.05856	0.122175	0.150361	0.0616693	0.0727875	2.64874	0.760129	1.51285	0.506463	0	0	0.423399	0.146404	0	0	0	0
Sol 789	1709	26.7028	1.3836	0.768953	1.2851	0.763393	0.279738	41.6609	1.75271	15.8825	1.07568	0.57144	0.185278	0.032633	0.0510407	4.72592	0.358578	2.91159	0.356668	0	0	0.628699	0.203145	0	0	0	0
Sol 789	1710	30.2368	1.56574	0	0	0.680038	0.238986	37.5185	1.5293	16.3412	0.866699	0.468546	0.157784	0.0767109	0.0844199	3.99085	0.312285	2.43132	0.329665	0	0	0.597571	0.191707	0	0	0	0
Sol 789	1711	27.4249	1.0228	0.494908	0.801778	0.670344	0.230432	38.9944	1.45012	16.1659	0.81018	0.485334	0.165785	0	0	2.50442	0.595928	1.44343	0.451271	0	0	0.802564	0.214728	0	0	0	0
Sol 789	1712	36.4244	1.35794	1.04768	1.00749	0.548215	0.201986	28.3407	1.02615	13.9842	0.696606	0.466693	0.252791	0.0440126	0.0569587	5.06822	0.461661	2.59187	0.385744	0	0	0.490297	0.160718	0	0	0	0
Sol 789	1713	37.5585	1.40206	0	0	0.856064	0.23066	24.8307	0.913286	12.7011	0.662524	1.07036	0.354669	0.0400401	0.0553638	4.98375	0.47744	2.28629	0.588703	0	0	0.461639	0.156753	0	0	0	0
Sol 789	1714	40.4513	1.47409	0.718142	0.839961	0.559476	0.174709	27.4368	0.976934	17.1876	0.813141	0.513133	0.160852	0	0	2.73748	0.397743	1.27151	0.277356	0	0	0.534005	0.16098	0	0	0	0
Sol 789	1715	51.5621	1.85438	0.549546	1.07236	0.401221	0.18116	21.0937	0.748217	14.583	0.687924	0.476919	0.137952	0	0	3.61742	0.378159	0.912012	0.30597	0	0	0.425044	0.149288	0	0	0	0
Sol 789	1716	40.2837	2.26201	0.314301	0.786576	0.564237	0.205488	32.2403	1.14658	18.5014	0.847554	0.5932	0.149562	0	0	3.13233	0.402447	0.6968	0.246233	0	0	0.5906	0.210348	0	0	0	0
Sol 789	1717	40.2866	1.45693	0	0	0.384984	0.174123	30.1879	1.07003	17.9468	0.822409	0.794143	0.191965	0.0310208	0.0446582	2.91383	0.403834	0.933703	0.312443	0	0	0.668175	0.165518	0	0	0	0
Sol 789	1718	40.2363	1.45649	0.219507	0.878827	0.60074	0.208756	29.3891	1.04426	15.7006	0.747271	0.439011	0.145857	0.449091	0.193215	3.76878	0.364844	1.52367	0.453605	0	0	0.480321	0.148285	0	0	0	0
Sol 789	1719	45.0809	2.32647	0.774041	0.835099	0.491954	0.170182	23.7989	0.844206	11.7103	0.594391	0.547155	0.150745	0.449655	0.157689	4.06114	0.338233	1.55212	0.318229	0	0	0.41254	0.149557	0	0	0	0
Sol 789	1720	62.9249	2.32381	1.94957	1.00583	0.45763	0.181563	9.67455	0.352582	7.45759	0.421323	0.245949	0.140903	0.029343	0.0653513	3.53026	0.390521	1.13049	0.377906	0	0	0.0812323	0.0733627	0	0	0	0
Sol 789	1721	61.7994	2.46627	0	0	0.28006	0.136113	4.25183	0.871366	5.8009	0.497343	0.0417556	0.0876728	0.0852563	0.0799133	3.02382	0.791689	0.903678	0.326668	0	0	0.0333926	0.0412872	0	0	0	0
Sol 789	1722	60.8167	2.42921	0	0	0.436837	0.170595	4.02646	0.833917	6.44402	0.530215	0.103682	0.0938435	0.0400602	0.0529869	4.1164	0.327307	1.29649	0.283899	0.00995699	0.0243909	0.0463093	0.0546458	0	0	0	0
Sol 789	1723	59.3106	2.15375	0	0	0.407124	0.18151	9.33517	0.473073	7.65392	0.42908	0.134813	0.104633	0.568876	0.151676	4.76491	0.294904	1.54174	0.316595	0.0103411	0.0248292	0.066519	0.0832056	0	0	0	0
Sol 789	1724	61.3809	2.20838	0.709657	0.722844	0.942283	0.242362	11.6769	0.418897	9.51955	0.48933	0.168492	0.122583	0.829249	0.204788	4.85372	0.242576	1.98771	0.363998	0	0	0.0863437	0.0729637	0	0	0.0012479	0.00758725
Sol 789	1725	66.7114	2.44497	0.30256	0.633573	0.396742	0.177119	8.4286	0.322474	7.70504	0.424033	0.114591	0.127336	0.191311	0.134649	3.61989	0.38405	1.30935	0.285401	0.00258745	0.0103498	0.0526844	0.0538224	0	0	0.00951912	0.0229877
Sol 789	1726	68.4894	2.45866	0	0	0.364327	0.179826	5.29359	0.259494	5.78318	0.34275	0.160972	0.118837	0	0	4.03077	0.33102	0.970097	0.22785	0.0212561	0.0334894	0.0307372	0.0419232	0.0229015	0.0353835	0	0
Sol 789	1727	57.7667	2.99387	0	0	0.243883	0.15028	5.7736	0.20831	8.2736	0.618051	0.199497	0.135233	0.193006	0.13527	4.18985	0.329088	1.09563	0.348039	0.0165213	0.0313005	0.0664911	0.0586224	0	0	0.00919876	0.0223904
Sol 789	1728	43.4801	2.2128	0.689081	1.05235	0.6747	0.2711	11.2725	0.5667	14.2789	0.9303	0.2731	0.2232	0.678844	0.217483	4.565	0.3833	1.9687	0.5133	0.0811432	0.0731164	0.1367	0.149	0	0	0	0
Sol 789	1729	33.3185	1.72198	0	0	0.671828	0.223218	19.9703	1.01081	15.8914	0.76834	0.5414	0.195233	0.550262	0.18338	4.8925	0.360508	1.89933	0.464705	0.0211427	0.0359173	0.212	0.199005	0	0	0.0103114	0.0253782
Sol 789	1730	24.01	1.26158	1.9292	1.90277	0.8584	0.327044	33.4486	1.69919	22.033	1.3917	1.0229	0.333108	0.184156	0.128545	4.28967	0.336081	1.69819	0.452542	0	0	0.5413	0.194352	0	0	0	0
Sol 789	1731	41.0362	1.49859	0	0	0.732651	0.204501	17.2131	0.61106	14.2337	0.668112	0.46421	0.142563	0.0661484	0.0654948	3.72421	0.367169	2.25304	0.382644	0	0	0.234557	0.148059	0	0	0.0225938	0.0332145
Sol 789	1732	35.0349	1.32295	0.02255	0.72195	0.739155	0.205754	18.8574	0.680443	10.8989	0.565494	0.316656	0.157113	0.0873443	0.0896573	5.21049	0.271782	1.73386	0.338223	0	0	0.192689	0.133619	0	0	0	0
Sol 789	1733	20.3352	0.749948	2.8557	1.8899	1.7775	0.5161	26.8407	0.956919	12.231	0.628509	0.6355	0.2245	0.108796	0.0947859	7.76709	0.300518	2.2987	0.5463	0	0	0.315911	0.156519	0	0	0	0
Sol 789	1734	32.7918	1.6832	0.408308	1.62802	1.75264	0.358107	21.3544	0.758577	12.8082	0.632368	0.902881	0.30061	0.102003	0.127381	11.0062	0.597356	1.81235	0.488697	0	0	0.230236	0.20939	0	0	0	0
Sol 789	1735	26.5696	0.980069	0	0	1.39462	0.316171	28.2763	1.00498	16.5039	0.786729	0.628554	0.15839	0.0665329	0.0761391	8.02058	0.311817	1.71836	0.501747	0	0	0.302132	0.157928	0	0	0.0115351	0.0264304
Sol 789	1736	29.234	1.1327	2.33018	1.35393	0.781273	0.244577	29.5313	1.48446	20.0086	0.960766	0.400092	0.145361	0.0224525	0.0417643	4.45	0.352916	2.08782	0.358376	0	0	0.314	0.147613	0	0	0.0240174	0.0388094
Sol 789	1737	35.5394	1.30043	2.39768	1.20975	1.93768	0.377982	18.9495	0.680796	16.2015	0.760374	0.346235	0.267393	0.0655213	0.0676514	3.8135	0.658654	2.4856	0.383995	0.0141377	0.0279924	0.155132	0.170485	0	0	0.0382081	0.07003
Sol 789	1738	32.625	1.18536	1.05416	0.791925	2.15346	0.398499	20.0688	0.713345	17.6122	0.799065	0.936198	0.219681	0.0146632	0.036534	6.06612	0.336391	2.11789	0.546962	0	0	0.193964	0.133705	0	0	0.0280378	0.0593864
Sol 789	1739	32.1819	1.17733	0	0	1.61721	0.343349	25.0799	0.897726	22.4636	0.98105	0.45575	0.145308	0.0470565	0.0591718	4.53189	0.278577	1.11395	0.252798	0	0	0.307711	0.15622	0	0	0	0
Sol 789	1740	33.311	1.21166	0.785766	0.787291	1.35933	0.314181	26.5742	0.943652	24.8844	1.06495	0.351122	0.161858	0.110602	0.0938967	3.21156	0.398575	0.683188	0.17014	0	0	0.289762	0.159855	0	0	0	0
Sol 789	1741	34.0697	1.23794	0.212755	0.746995	0.384562	0.188279	27.0829	0.962201	28.2116	1.1786	0.202783	0.137276	0.0504819	0.0567204	2.43394	0.393439	0.354644	0.16308	0	0	0.300921	0.161558	0	0	0	0
Sol 789	1742	33.6636	1.2308	0.844403	0.751095	0.2744	0.182473	25.9528	0.925352	29.4743	1.23391	0.0972354	0.08893	0	0	1.33621	0.396243	0.194972	0.198855	0	0	0.253685	0.229433	0	0	0	0
Sol 789	1743	35.3524	1.29093	0.180827	0.71469	0.184723	0.158151	27.4516	0.974213	31.6495	1.31196	0.0967806	0.0858283	0	0	1.28712	0.384377	0.178076	0.188332	0	0	0.246108	0.227757	0	0	0	0
Sol 789	1744	36.1227	1.33538	0.352185	0.716027	0.212436	0.166264	27.6544	0.987032	29.339	1.79234	0.0806175	0.0837253	0	0	1.22838	0.27238	0.138539	0.157957	0	0	0.259643	0.242658	0	0	0	0
Sol 789	1745	31.5109	1.20962	0.541975	0.634729	0.471899	0.189598	26.1823	0.96648	27.0797	1.21358	0	0	0	0	1.53193	0.493118	0.175094	0.196847	0	0	0.180252	0.199357	0	0	0	0
Sol 789	1746	31.2705	1.60951	1.17625	1.56948	1.1245	0.407771	32.3262	1.62033	27.5762	1.65113	0.6984	0.243601	0.173644	0.155938	6.7147	0.651894	1.52281	0.421606	0	0	0.6158	0.217701	0	0	0	0
Sol 789	1747	19.5079	0.803928	0.839936	1.36721	1.14521	0.285927	35.4336	1.30197	16.8047	0.853025	0.532917	0.164267	0	0	6.54551	0.341681	2.22856	0.385276	0	0	0.503318	0.180552	0	0	0	0
Sol 789	1748	23.0869	0.865407	0	0	1.13308	0.284197	27.3152	1.0066	13.6811	0.699165	0.554974	0.179353	0.0661679	0.0726553	7.45578	0.316586	2.60173	0.396047	0	0	0.354335	0.15529	0	0	0	0
Sol 789	1749	13.376	0.507838	0	0	0.538434	0.170509	33.0161	1.68541	19.3911	0.898331	0.373726	0.147178	0.0470411	0.0586541	3.23813	0.612289	1.47152	0.306032	0	0	0.555091	0.197426	0	0	0	0
Sol 789	1750	11.1841	0.462849	0	0	0.789786	0.219243	40.1804	1.44559	14.8031	0.750238	0.38562	0.153394	0.107225	0.102327	2.79237	0.630604	2.43511	0.377736	0	0	0.6362	0.22162	0	0	0.0136075	0.0373978
Sol 789	1751	19.4694	0.726873	0	0	0.946136	0.248319	40.6448	1.44559	13.7737	0.714666	0.362692	0.257403	0.0352075	0.0488462	3.43664	0.630129	2.7917	0.621347	0	0	0.519907	0.220903	0	0	0	0
Sol 789	1752	24.7103	0.910862	0	0	0.897987	0.243771	41.5145	1.47824	16.284	0.813463	0.425608	0.150878	0	0	4.96333	0.253101	3.40519	0.385331	0	0	0.4705	0.198284	0	0	0	0
Sol 789	1753	24.2762	0.891477	1.36494	1.0573	0.948223	0.251663	40.9481	1.4512	16.5018	0.797409	0.336205	0.233298	0	0	4.90922	0.214139	3.61179	0.367574	0	0	0.557823	0.149601	0.114798	0.0931048	0.223735	0.14502
Sol 789	1754	29.538	1.09603	2.42547	1.52091	0.893752	0.243451	39.7868	1.43512	17.1485	0.826068	0.584864	0.165031	0	0	4.86554	0.264188	3.5902	0.535353	0	0	0.538184	0.159021	0	0	0.145562	0.111501
Sol 789	1755	25.5563	0.955508	0.604891	0.996425	0.963926	0.254011	38.657	1.39107	17.389	0.838004	0.479721	0.154305	0	0	3.89237	0.35615	2.63739	0.390556	0	0	0.444182	0.152253	0	0	0	0
Sol 789	1756	24.3295	0.892119	2.04629	1.36621	0.972813	0.253554	30.3744	1.07722	14.0655	0.704196	0.679874	0.168682	0	0	6.60696	0.26041	2.41582	0.39195	0	0	0.355349	0.231254	0.00898505	0.0220134	0	0
Sol 789	1757	40.567	2.0691	0.770664	1.11206	1.16636	0.28659	17.7139	0.8892	11.4064	0.8121	0.800271	0.197301	0.107884	0.0949209	11.1231	0.6033	1.8905	0.5035	0	0	0.2403	0.2118	0	0	0.018961	0.0341729
Sol 789	1758	52.7718	2.6869	0	0	1.2787	0.425015	19.0047	0.956386	11.3694	0.810591	0.9385	0.311219	0.108446	0.113991	7.15495	0.476373	2.06987	0.48416	0	0	0.2841	0.225502	0	0	0	0
Sol 789	1759	50.0151	1.85918	0.881712	1.113	0.237148	0.158077	15.5202	0.559151	6.44947	0.401461	0.316207	0.155804	0.0769984	0.0853313	3.55116	0.757219	1.59193	0.325274	0	0	0.251273	0.148042	0	0	0	0
Sol 789	1760	59.1814	2.18183	0.0845523	0.665705	0.435659	0.175624	8.41339	0.42983	5.92239	0.365994	0.369954	0.152105	0.0387013	0.0526922	5.31304	0.2871	1.18149	0.264588	0	0	0.12391	0.0981707	0	0	0	0
Sol 789	1761	45.6731	1.69991	0.571622	1.01156	0.673965	0.195045	9.02218	0.326835	11.3291	0.580723	0.407337	0.154849	0.0508672	0.0633299	7.30932	0.288996	1.9548	0.356501	0.104347	0.0885875	0.0734885	0.064763	0	0	0.0104474	0.0246619
Sol 789	1762	43.9111	1.5803	1.27099	1.0612	0.864057	0.229358	9.20377	0.329187	11.9555	0.827856	0.515861	0.150404	0.0682642	0.0774597	10.4252	0.404241	2.008	0.366585	0.0976509	0.0817267	0.1038	0.120202	0.00305458	0.0098648	0	0
Sol 789	1763	28.9331	1.08827	0.169056	0.792089	1.53813	0.339219	11.0691	0.41923	12.6369	0.632318	0.87941	0.211523	0.183271	0.134892	15.3435	0.609142	2.0238	0.365505	0.0848815	0.106356	0.2553	0.126303	0	0	0.00580811	0.0169059
Sol 789	1764	35.6784	1.54095	2.05306	1.15978	2.82595	0.445175	19.1376	0.823149	16.6393	1.01601	0.571189	0.188277	0.106116	0.112391	9.91257	0.598387	2.97698	0.458376	0.128274	0.120039	0.2279	0.206701	0	0	0.5135	0.186003
Sol 789	1765	36.6467	1.53838	0.878519	1.23772	3.50548	0.353289	22.5547	0.899736	15.2759	0.875804	0.33771	0.117731	0.0774102	0.0867106	5.26639	0.376785	3.08014	0.370759	0.0183988	0.031742	0.0748498	0.0796025	0	0	0.527048	0.187592
Sol 789	1766	38.6621	1.43924	0.583188	1.18318	3.54679	0.343714	20.6653	0.753077	15.4463	0.750041	0.288105	0.150965	0	0	3.80653	0.72021	3.0239	0.370843	0	0	0.123315	0.0983312	0	0	0.116682	0.0953154
Sol 789	1767	42.5752	1.5732	0	0	3.30496	0.41106	20.1139	0.732604	16.2621	0.776794	0.228379	0.147943	0.0246217	0.0410706	3.44476	0.448838	3.14353	0.398369	0.0239119	0.0370125	0.133551	0.104518	0	0	0.114964	0.0946051
Sol 789	1768	40.3744	1.54707	0.655764	0.881115	2.44012	0.402003	20.5228	0.744735	18.4799	0.895459	0.390004	0.144592	0.0536935	0.0656574	3.58813	0.378297	3.61714	0.369011	0.40547	0.153622	0.198211	0.135397	0	0	0.0507403	0.0595025
Sol 789	1769	44.0211	1.81709	0.399483	1.17333	2.52719	0.386333	18.6513	0.71838	18.9445	0.959316	0.368746	0.327173	0.0839793	0.091349	3.8572	0.374006	3.34915	0.387074	0.13938	0.110709	0.141074	0.112562	0	0	0.252292	0.111516
Sol 789	1770	47.8906	1.89552	0	0	2.44336	0.39734	17.6766	0.669285	18.3661	0.9046	0.179867	0.12742	0.112467	0.106403	3.6911	0.383577	3.16483	0.378673	0.123143	0.100814	0.0925101	0.0795216	0.0482572	0.057114	0.0391057	0.0482015
Sol 789	1771	45.6609	1.73618	0	0	4.24144	0.363176	20.0388	0.735054	16.2958	0.779395	0.301727	0.161899	0.0214235	0.0404632	2.78171	0.406994	3.06639	0.398478	0.0252596	0.0337495	0.0484835	0.0530479	0	0	0.195731	0.13462
Sol 789	1772	44.4203	1.69022	0	0	4.34359	0.366389	20.3551	0.741049	17.6675	0.851254	0.351772	0.162137	0.0118941	0.0349616	3.04259	0.406638	3.41488	0.383426	0.0291744	0.0423574	0.0457828	0.0494791	0	0	0.41723	0.140003
Sol 789	1773	34.7431	1.8353	0.0593727	0.758047	2.54298	0.403541	20.5527	0.738157	14.747	1.01021	0.15833	0.117791	0	0	3.45495	0.387729	3.93326	0.331391	0.619759	0.159434	0.111299	0.0906776	0	0	0.107458	0.126099
Sol 789	1774	42.2265	1.52348	0.437632	0.807322	3.0636	0.42567	20.5788	1.0412	17.5621	0.796109	0.141591	0.108609	0.0403528	0.0533612	3.27532	0.571632	3.3924	0.388826	0.0898741	0.0767117	0.0934594	0.0781909	0	0	0.272967	0.157801
Sol 789	1775	40.2503	1.79476	1.50886	1.11399	3.59126	0.413398	20.354	0.938027	18.4864	1.17862	0.353156	0.12812	0.0906622	0.101069	5.14151	0.425538	3.69722	0.277259	0	0	0.159741	0.131993	0	0	0.149412	0.155966
Sol 789	1776	27.8937	1.50085	0.422337	0.755179	2.83312	0.491007	25.5784	1.31577	15.6101	1.65515	0.675034	0.224563	0.12026	0.124214	7.31867	0.562026	3.21622	0.269874	0	0	0.267991	0.14541	0	0	0.202091	0.148999
Sol 789	1777	25.6999	1.33196	1.04648	0.992887	1.8228	0.523931	16.7482	0.692124	14.3214	0.73399	0.76937	0.226576	0.0765618	0.0858189	10.6614	0.482307	2.08922	0.471289	0.0573229	0.0621841	0.244882	0.148319	0	0	0.0153171	0.0321127
Sol 789	1778	29.9491	1.11992	0.120013	0.79335	1.87455	0.363832	14.0471	0.501961	14.0181	0.67845	0.543511	0.138555	0.0132419	0.0364278	10.112	0.5497	2.3445	0.387445	0.103951	0.0859413	0.400183	0.150159	0	0	0.00199363	0.00922054
Sol 789	1779	36.3067	1.93672	0	0	1.44991	0.33183	27.2095	1.42358	15.0783	0.750808	0.635088	0.175659	0.130149	0.115775	10.0829	0.398663	2.42245	0.396014	0.000730651	0.0102291	0.443773	0.157792	0	0	0	0
Sol 789	1780	43.5109	2.32461	0.804068	0.854455	0.707753	0.204032	19.4499	1.02499	11.3525	0.583662	0.4051	0.224195	0.0798708	0.0767836	8.55413	0.331522	1.93871	0.359144	0	0	0.257268	0.154048	0	0	0	0
Sol 789	1781	69.5322	2.48456	0.231149	0.608589	0.2088	0.156547	4.4699	0.271202	5.13921	0.34228	0.243788	0.150967	0.0314797	0.0470567	7.60546	0.295579	0.872514	0.209632	0	0	0.037708	0.045241	0.00387557	0.0113783	0.0119797	0.026555
Sol 789	1782	75.6081	2.703	0.62805	0.864612	0.281447	0.177044	3.22858	0.39096	4.57502	0.377991	0.150239	0.113059	0.0411751	0.0550253	6.62571	0.259883	0.595143	0.152693	0	0	0.0106038	0.0204119	0	0	0.00440309	0.0120293
Sol 789	1783	75.5643	3.88009	0.946412	0.913872	0.269248	0.167417	3.2953	0.553464	4.78308	0.340869	0.208219	0.138525	0.053199	0.0627463	6.09052	0.240656	0.741476	0.183399	0	0	0.00825116	0.0180979	0.00150182	0.00595724	0.0055	0.0191
Sol 789	1784	51.8042	2.63652	0.440252	0.96923	0.632919	0.213059	7.55509	0.275098	8.34128	0.453886	0.530953	0.153468	0.11986	0.103707	11.3755	0.444926	1.32946	0.28875	0.0132148	0.0295112	0.084606	0.0727393	0	0	0.00333412	0.0110127
Sol 789	1785	45.8112	2.332	0.248288	1.03128	1.10297	0.339505	15.853	0.683223	13.592	0.813232	0.897283	0.269282	0.124631	0.124406	13.3892	0.621741	2.4052	0.5561	0.0262	0.058	0.319565	0.139701	0	0	0	0
Sol 789	1786	27.1378	1.0429	1.26497	1.0182	1.12649	0.285474	37.2468	1.36305	14.5512	0.764318	0.489774	0.167293	0	0	6.84698	0.363758	2.82622	0.405099	0	0	0.526613	0.170709	0.247343	0.212471	0	0
Sol 789	1787	26.4853	0.975553	0.70588	1.08242	0.953197	0.251868	37.8988	1.35205	15.4578	0.76217	0.466845	0.155602	0.00166168	0.0245224	5.64426	0.284584	2.89877	0.403835	0	0	0.481903	0.15261	0	0	0	0
Sol 789	1788	18.5563	0.9753	0.459655	1.03328	1.00879	0.259718	42.8357	2.1463	15.6408	0.774612	0.5131	0.1861	0.0186	0.0611	4.9944	0.2807	2.7243	0.5673	0	0	0.5832	0.2078	0	0	0	0
Sol 789	1789	27.4462	1.41941	0	0	1.04224	0.265891	36.2022	1.28299	15.7716	0.762626	0.503832	0.183134	0.0300966	0.044145	4.18198	0.454688	2.57439	0.398023	0	0	0.392179	0.2256	0	0	0	0
Sol 789	1790	41.4232	2.11916	0.623663	1.22278	0.83891	0.242305	16.9041	0.698325	11.1817	0.620085	1.0521	0.340425	0	0	5.41576	0.389353	2.37545	0.387349	0.0054736	0.0180406	0.273115	0.150747	0	0	0	0
Sol 789	1791	29.0906	1.21242	1.03799	1.48369	1.03836	0.283548	32.4202	1.29621	13.9974	0.835244	0.451707	0.159176	0.0539232	0.0682759	4.51278	0.360665	2.94766	0.386129	0	0	0.463991	0.160899	0	0	0	0
Sol 789	1792	22.7922	0.867283	0	0	1.27806	0.304911	43.7671	1.56963	16.4376	0.816335	0.599312	0.162074	0.0360984	0.0508017	4.13294	0.324425	3.1671	0.691643	0	0	0.567109	0.144004	0	0	0	0
Sol 789	1793	22.0591	0.813603	2.23183	1.48208	1.55032	0.340045	42.3357	1.50008	14.8127	0.741263	0.680092	0.168676	0.272652	0.158552	4.58002	0.433389	2.93824	0.591551	0	0	0.538729	0.192901	0	0	0	0
Sol 789	1794	22.8958	0.844758	0	0	1.99606	0.380838	38.5745	1.37073	14.8701	0.735682	1.03112	0.237041	0.360459	0.164006	5.09374	0.248883	2.7712	0.398757	0	0	0.577961	0.205527	0	0	0	0
Sol 789	1795	17.6186	0.718676	0.546251	1.50093	1.26034	0.311844	35.0039	1.40525	16.5871	0.91604	0.653852	0.187085	0.200277	0.140392	5.76676	0.397077	3.02283	0.36202	0	0	0.457014	0.164408	0	0	0	0
Sol 789	1796	25.5668	1.01521	0	0	0.721667	0.231199	26.6158	1.1131	23.563	1.1355	0.244372	0.114041	0.0720881	0.0803873	5.96431	0.393597	0.736251	0.468384	0	0	0.110605	0.132213	0	0	0	0
Sol 789	1797	34.0948	1.23854	0	0	0.341161	0.189223	27.6726	0.981519	28.6507	1.70634	0.172345	0.124291	0	0	3.59258	0.522451	0.380276	0.225533	0	0	0.289777	0.223756	0	0	0	0
Sol 789	1798	35.4724	1.37243	0	0	0.415719	0.182611	28.7836	1.47597	29.926	1.76384	0.152264	0.117148	0	0	2.79844	0.379956	0.438361	0.159165	0.0108871	0.0246497	0.323766	0.215192	0	0	0	0
Sol 789	1799	40.4436	2.08623	0.0344814	0.760911	0.700659	0.223961	18.6978	0.948093	25.5043	1.52056	0.5956	0.212245	0.00739146	0.0436188	3.77361	0.357778	0.718227	0.24686	0.17265	0.173998	0.2163	0.201106	0	0	0.4941	0.185112
Sol 789	1800	36.1743	1.3111	1.36937	1.10306	0.786216	0.218042	23.1139	0.819637	26.1101	1.10188	0.38785	0.157043	0	0	2.92045	0.555981	0.554235	0.143308	0	0	0.266471	0.155761	0	0	0.0878541	0.0751369
Sol 789	1801	36.9849	1.33916	1.67183	1.46301	4.50756	0.318769	17.9947	0.640933	17.8185	0.799947	0.747191	0.182771	0.16648	0.124753	3.93322	0.351681	0.580915	0.208729	0.360392	0.157656	0.18182	0.127978	0	0	0.545265	0.138638
Sol 789	1802	28.0587	1.02597	2.15492	1.53393	4.12183	0.36018	19.4108	0.689351	10.3272	0.757493	0.835668	0.200298	0.162648	0.114928	3.96921	0.435298	1.22515	0.37749	0.690314	0.244027	0.18013	0.177102	0	0	0.320091	0.161299
Sol 789	1803	19.601	0.747626	0	0	1.13754	0.281603	29.283	1.06611	14.9983	0.748786	0.326962	0.26434	0.0730948	0.0816233	5.01215	0.525257	2.65122	0.37813	0.00899664	0.0235221	0.385619	0.142472	0	0	0	0
Sol 789	1804	23.3431	0.955045	0.28112	1.00989	0.976526	0.278104	31.6816	1.18744	15.8349	0.88646	0.41801	0.149963	0.0306756	0.0459103	5.33948	0.361079	2.74038	0.393818	0.0241365	0.0339001	0.48071	0.165863	0	0	0	0
Sol 789	1805	25.2466	0.953566	1.8973	1.42522	1.50285	0.335107	36.3448	1.3288	20.6641	0.976717	0.386623	0.161543	0.0627164	0.073869	3.57686	0.381781	2.54036	0.40346	0.00564315	0.0178019	0.592229	0.152805	0	0	0	0
Sol 789	1806	25.9874	1.36202	0	0	0.766616	0.304501	34.028	1.20781	17.4845	1.16336	0.373811	0.159667	0.17367	0.126253	3.37582	0.386873	2.1521	0.514573	0	0	0.397116	0.153918	0	0	0	0
Sol 789	1807	37.6044	1.37817	0	0	2.08755	0.383176	19.4747	0.69475	15.762	0.738932	0.642525	0.160606	0.38578	0.162504	4.86134	0.234177	2.58049	0.592852	0.0339631	0.0447724	0.163502	0.119959	0.00220253	0.00850976	0.0761967	0.0698312
Sol 789	1808	31.3779	1.62296	1.87022	1.21088	2.257	0.53138	18.145	0.683388	14.393	0.713138	1.02709	0.323093	0.954016	0.231314	9.89678	0.402248	2.31822	0.396755	0.0780145	0.0696195	0.174415	0.127029	0	0	0.0583375	0.0737094
Sol 789	1809	32.1508	1.65161	2.09914	1.48377	1.62652	0.418079	35.6131	1.78474	16.9165	2.01386	0.822524	0.26122	0.571638	0.210327	11.0508	0.742602	2.58133	0.41953	0	0	0.4757	0.1953	0	0	0	0
Sol 789	1810	37.2751	1.91265	0.569871	1.0121	1.33137	0.323057	32.2142	1.24512	17.1353	0.895757	0.593293	0.189076	0.259176	0.162455	5.89418	0.402028	2.68672	0.481296	0	0	0.484	0.190707	0	0	0	0
Sol 789	1811	21.0171	0.786467	1.71031	1.96767	0.749527	0.210551	34.237	1.21644	19.8489	0.910934	0.56991	0.164894	0.233904	0.151511	3.82148	0.426626	1.66793	0.487989	0	0	0.474077	0.171146	0	0	0	0
Sol 789	1812	14.9666	0.567131	1.67425	0.943402	0.581243	0.200814	36.7599	1.30277	21.0233	0.950883	0.3939	0.22694	0.249979	0.155549	3.7496	0.528226	1.1579	0.369673	0	0	0.4592	0.204002	0	0	0	0
Sol 789	1813	29.1034	1.52577	1.12695	1.08658	0.520403	0.160612	14.9093	0.529679	12.6446	0.877656	0.2317	0.208814	0.926993	0.222301	3.57487	0.376866	1.41201	0.416125	0	0	0.174138	0.124559	0	0	0	0
Sol 789	1814	54.2444	1.95211	0	0	0.485651	0.161544	6.86353	0.247065	9.33013	0.477959	0.144657	0.110347	1.1869	0.267071	3.43678	0.391288	1.67621	0.334071	0.0434039	0.0481937	0.0416998	0.0452728	0	0	0	0
Sol 789	1815	62.2021	2.22913	0.909206	1.0024	0.322145	0.186306	12.2189	0.434426	11.4439	0.560419	0.0975729	0.114207	0.389855	0.15119	2.63302	0.55078	1.35132	0.406593	0.0180306	0.0325383	0.141592	0.10818	0	0	0	0
Sol 789	1816	58.128	2.08451	0.838169	0.762336	0.417135	0.173815	12.7319	0.459741	11.9526	0.586857	0.2052	0.195823	0.910255	0.22045	3.66798	0.371304	1.54148	0.316695	0.00236771	0.0185299	0.111708	0.0902209	0	0	0.0241134	0.0336449
Sol 789	1817	47.1522	1.70026	0	0	0.652624	0.191407	21.6139	1.09258	11.5248	0.833315	0.140916	0.155339	6.23985	0.353103	4.76379	0.424102	1.71061	0.488179	0	0	0.0726316	0.0897039	0	0	0	0
Sol 789	1818	35.3835	1.26416	1.73631	0.571047	0.881731	0.214023	26.6075	0.953174	12.1005	0.480844	0.178103	0.1264	11.5672	0.606677	8.26902	0.313553	1.67545	0.330706	0.0940758	0.0785227	0.112721	0.0906542	0	0	0.0222034	0.0349432
Sol 789	1819	56.6312	2.04992	0.196911	0.996351	0.478219	0.166822	14.0173	0.497943	9.02036	0.677964	0.202053	0.13709	5.27449	0.311121	6.05843	0.347524	1.55956	0.319157	0.0669741	0.0604207	0.0526468	0.0476105	0	0	0.0150639	0.0284123
Sol 789	1820	71.9601	2.57067	0	0	0.217624	0.161815	4.4914	0.43203	5.21021	0.35904	0.0944353	0.0808538	1.20306	0.269006	3.1914	0.582285	1.03478	0.239413	0.0147618	0.0285066	0.0363586	0.0407837	0	0	0.0075535	0.019555
Sol 789	1821	68.71	2.51528	0.106298	0.644461	0.254523	0.126774	6.66582	0.340021	5.82385	0.414141	0.0286296	0.0629623	0.406401	0.276768	2.93861	0.654976	0.686646	0.247474	0	0	0.0239744	0.0552811	0	0	0	0
Sol 789	1822	41.497	1.52828	0.505985	0.768977	0.450392	0.180135	21.588	0.769319	12.2648	0.611906	0.463328	0.160166	4.65943	0.324271	3.93419	0.71812	0.801571	0.199238	0	0	0.16855	0.161168	0	0	0	0
Sol 789	1823	25.6976	0.94078	0.0661315	0.854703	0.633833	0.196526	35.7908	1.26999	15.9895	0.765923	0.602793	0.215559	8.71971	0.481488	5.07228	0.326664	0.751904	0.264898	0	0	0.281745	0.21888	0	0	0	0
Sol 789	1824	29.4818	1.09802	1.45719	0.622976	0.651286	0.178313	36.8299	1.85668	13.4552	0.559118	0.415074	0.150332	12.2674	0.461214	5.57688	0.292678	0.821593	0.27323	0	0	0.682349	0.172322	0	0	0.0308354	0.0582128
Sol 789	1825	52.96	1.9701	0.438018	0.775731	0.352135	0.190761	23.9453	0.896881	13.23	0.668474	0.676939	0.178342	1.45611	0.309728	4.20869	0.32644	1.32419	0.288908	0	0	0.515563	0.170882	0	0	0.00602163	0.0174016
Sol 789	1826	45.0035	1.66456	0	0	0.626251	0.196622	24.1031	0.8885	16.1786	0.764979	0.542156	0.163763	0	0	4.46561	0.302747	1.13273	0.257613	0	0	0.441956	0.152537	0	0	0	0
Sol 789	1827	34.0548	1.7477	0.0981079	0.889693	0.633566	0.189037	32.1932	1.6136	17.4537	1.1506	0.388	0.2279	0	0	3.1328	0.567	1.4009	0.4218	0	0	0.6218	0.2196	0	0	0	0
Sol 789	1828	42.2874	1.52668	0.738015	0.848483	0.812287	0.223085	29.3281	1.04046	15.5049	0.735023	0.391889	0.156496	0.0452336	0.0584004	3.97822	0.346641	1.71741	0.337296	0	0	0.468742	0.212739	0	0	0	0
Sol 789	1829	34.4158	1.76828	0	0	0.807442	0.222595	30.0275	1.06541	17.6451	0.813316	0.264363	0.225724	0.0494164	0.057156	5.27503	0.294681	1.38096	0.421315	0	0	0.371164	0.239503	0	0	0	0
Sol 789	1830	55.5638	1.99973	0.775821	1.06745	0.389751	0.186384	18.4381	0.662024	12.4689	0.612151	0.318028	0.163017	0.937712	0.225877	3.86513	0.350705	1.36428	0.292773	0	0	0.384172	0.142435	0	0	0.006	0.0219
Sol 789	1831	45.4286	2.35497	0.291	0.313985	0.58621	0.160511	24.0336	1.23976	7.77726	0.329784	0.20195	0.125999	15.2452	0.571283	3.93623	0.35444	0.683572	0.170988	0	0	0.357506	0.138529	0	0	0.029	0.0579004
Sol 789	1832	20.8223	0.773039	0	0	0.531189	0.250499	27.56	1.40669	16.6298	0.794092	0.0563586	0.0729562	9.82973	0.541224	2.6444	0.617	0.334476	0.256974	0	0	0.256287	0.231239	0	0	0	0
Sol 789	1833	24.7167	0.911401	0.275165	0.765576	0.457681	0.178347	28.7789	1.02992	21.8216	0.975304	0.146454	0.161458	4.87503	0.279956	3.37754	0.483591	0.495687	0.180665	0	0	0.299416	0.245172	0	0	0	0
Sol 789	1834	30.3983	1.12811	1.15757	0.841219	0.693762	0.199343	21.9257	1.11504	12.4077	0.628547	0.191793	0.130409	6.47541	0.261677	4.92223	0.305815	1.02014	0.237844	0	0	0.214511	0.217468	0	0	0	0
Sol 789	1835	44.304	1.62826	1.50692	0.915315	0.811145	0.222692	22.3222	0.822685	11.5055	0.607505	0.214988	0.13974	2.84507	0.334132	3.43423	0.689601	1.82127	0.343304	0.00966662	0.0243663	0.094115	0.114268	0	0	0	0
Sol 789	1836	34.3269	1.22562	1.95437	0.606023	1.31395	0.288056	26.8535	0.957566	14.5278	0.568694	0.286733	0.157186	9.37038	0.346994	4.9237	0.277414	1.94301	0.3582	0.157092	0.116468	0.220542	0.141944	0	0	0.0959575	0.0805086
Sol 789	1837	21.1626	0.779744	1.42066	1.4045	1.26068	0.298918	38.9053	1.38106	12.3088	0.639472	0.156474	0.116583	18.8813	0.705114	5.44322	0.214948	1.47346	0.307827	0.0211481	0.0360132	0.095482	0.0815382	0	0	0	0
Sol 789	1838	30.2594	1.08139	1.43882	0.588302	0.959391	0.228826	31.2494	1.10767	14.6615	0.572231	0.268294	0.156211	12.2165	0.456583	5.04809	0.227835	1.58384	0.320401	0	0	0.238141	0.148851	0	0	0.0142395	0.0286789
Sol 789	1839	35.1064	1.28152	1.3515	1.19148	0.671035	0.195185	25.184	0.899222	18.9778	0.863376	0.31408	0.246873	1.74409	0.339362	2.96582	0.40066	1.16517	0.361755	0.0335314	0.0421755	0.344195	0.163392	0	0	0.0266066	0.0342944
Sol 789	1840	31.8228	1.15682	0	0	0.809747	0.222263	27.9245	1.41362	15.5938	1.05727	0.275752	0.226315	3.63199	0.379481	3.12456	0.400766	1.31846	0.401961	0.00139973	0.00974809	0.438196	0.148739	0	0	0.00604817	0.0173447
Sol 789	1841	34.943	1.24477	1.8652	0.615616	0.760121	0.190224	26.7233	1.34734	14.1383	0.556125	0.20153	0.192763	10.3435	0.544804	4.18092	0.319846	1.81097	0.345412	0.0287007	0.0388578	0.196746	0.189972	0	0	0.0306396	0.0592832
Sol 789	1842	27.8465	1.01777	0.582849	0.896857	0.759271	0.211433	29.8388	1.05774	12.3709	0.629106	0.217738	0.142607	12.1048	0.458528	4.23812	0.316144	1.68308	0.334052	0	0	0.179101	0.127223	0	0	0	0
Sol 789	1843	24.004	0.882886	0	0	0.782778	0.215783	33.8358	1.20054	16.2227	0.776319	0.34797	0.161112	4.037	0.343217	5.36545	0.211108	1.66667	0.331964	0	0	0.433	0.214753	0	0	0	0
Sol 789	1844	22.5251	0.828654	0	0	1.09253	0.272679	36.2168	1.83406	20.1261	0.914811	0.615153	0.154339	0.711732	0.180981	5.63766	0.221132	1.7673	0.483428	0.0160801	0.0316127	0.529794	0.190585	0	0	0	0
Sol 789	1845	26.3465	1.39191	0.788033	0.898517	1.2967	0.43053	35.0066	1.24084	17.6428	1.17749	1.1004	0.352403	0.944534	0.225656	4.92409	0.212631	1.89037	0.501287	0	0	0.5323	0.191587	0	0	0	0
Sol 789	1846	20.6338	0.782023	0.212446	0.9026	0.900465	0.23873	36.0965	1.29504	16.5414	0.828813	0.52717	0.167428	1.4683	0.310252	4.14532	0.322231	1.54762	0.312642	0	0	0.644235	0.186758	0	0	0	0
Sol 789	1847	32.5015	1.1791	1.10861	0.874553	1.89196	0.376115	20.5864	1.06505	15.3405	0.721783	0.240573	0.150044	4.01003	0.347655	2.8175	0.572483	2.33744	0.388079	0.000544279	0.00915379	0.136795	0.105742	0	0	0.0292	0.0598004
Sol 789	1848	44.438	1.60238	1.41137	1.18756	2.54561	0.419245	18.642	0.661487	15.8988	0.732237	0.0948356	0.079843	1.119	0.256654	2.6066	0.399999	2.97572	0.40191	0	0	0.0856966	0.0726059	0	0	0.10745	0.0879429
Sol 789	1849	39.8012	1.46556	1.05284	0.894618	2.71698	0.40255	19.2035	0.685767	17.7195	0.810539	0.186543	0.130709	0.187639	0.129794	3.03487	0.402622	2.70276	0.398786	0	0	0.122734	0.097217	0	0	0.0585354	0.0636341
Sol 789	1850	23.4582	1.26398	1.60721	1.29144	2.1376	0.563179	28.5182	1.01212	17.5656	0.815425	0.2858	0.226438	0.0973746	0.0961875	3.75472	0.366006	2.50589	0.395493	0	0	0.32046	0.157267	0	0	0	0
Sol 789	1851	22.6396	0.838017	1.49264	1.04041	2.02676	0.392182	40.4795	1.43478	19.2918	0.900744	0.354892	0.16344	0.030299	0.0441633	3.80379	0.362866	2.29714	0.533936	0	0	0.540446	0.139132	0	0	0	0
Sol 789	1852	25.3765	0.945054	0.841174	1.84718	1.5847	0.344677	40.7405	1.45709	19.6915	0.924191	0.378231	0.160816	0.134211	0.109494	4	0.347822	2.67339	0.529852	0	0	0.575338	0.148332	0	0	0	0
Sol 789	1853	26.9392	0.986386	0	0	1.60797	0.348788	38.95	1.38187	17.0234	0.813313	0.605668	0.153202	0.136841	0.110749	4.03753	0.328689	3.12091	0.52903	0	0	0.519848	0.143129	0	0	0	0
Sol 789	1854	24.1041	1.26135	0.721343	0.899506	1.36999	0.318734	33.1228	1.20363	16.2151	0.788029	0.789537	0.194097	0.0363017	0.0503996	5.07527	0.323554	2.59299	0.394404	0	0	0.445471	0.154124	0	0	0.12332	0.108169
Sol 789	1855	29.249	1.50653	0.712955	1.02874	1.02033	0.25833	15.9873	0.567768	18.4566	0.821235	0.856392	0.287731	0.0130395	0.0341113	3.26523	0.546796	1.04566	0.338826	0	0	0.199067	0.135717	0	0	0.665258	0.232893
Sol 789	1856	31.2067	1.13435	1.49094	0.815875	0.841191	0.228159	20.4748	0.726761	19.1519	1.20652	0.315722	0.161073	0	0	2.6079	0.567308	0.513996	0.188491	0	0	0.188618	0.131432	0	0	0.0696031	0.0612561
Sol 789	1857	24.2976	0.966012	0.498112	0.813708	0.501858	0.177295	12.8417	0.658287	18.0118	0.934341	0.139351	0.108351	0	0	4.61398	0.324908	0.600287	0.210481	0	0	0.219094	0.181247	0	0	0	0
Sol 789	1858	28.3681	1.21556	0.708068	0.907464	0.85298	0.238552	28.7038	1.1591	22.2797	1.11362	0.356307	0.160321	0	0	6.18631	0.366967	1.24467	0.367012	0	0	0.387647	0.180096	0	0	0	0
Sol 789	1859	22.4832	1.2419	0	0	0.739962	0.212438	26.6809	1.42916	20.307	0.913187	0.269674	0.154273	0	0	7.86973	0.304907	1.90642	0.353275	0	0	0.408533	0.146794	0	0	0	0
Sol 789	1860	31.9876	1.20617	0.456654	1.29178	1.18015	0.287925	28.6032	1.03156	16.6069	0.804336	0.291207	0.156581	0.100044	0.097958	8.4715	0.337498	2.77592	0.387044	0	0	0.297219	0.152401	0	0	0	0
Sol 789	1861	33.7383	1.2538	0.80215	0.929304	1.18667	0.291268	33.6174	1.20579	16.4875	0.810313	0.550139	0.155918	0.0340147	0.0479418	3.91843	0.337387	2.34102	0.390585	0	0	0.515719	0.156417	0	0	0	0
Sol 789	1862	26.714	0.977126	2.47362	1.45282	1.19787	0.290721	37.2372	1.31957	17.1196	0.812695	0.389053	0.159172	0.0995521	0.0888314	3.50807	0.549428	2.74197	0.397327	0	0	0.589116	0.209373	0	0	0	0
Sol 789	1863	21.9708	1.14988	0	0	1.04923	0.269615	39.7816	1.41406	13.9141	0.709425	0.457886	0.23646	0.0474493	0.0612851	4.15099	0.320177	3.44435	0.486517	0	0	0.658856	0.163425	0	0	0	0
Sol 789	1864	28.6963	1.06832	0.45248	0.988317	1.17448	0.290358	34.1425	1.23224	14.6021	0.733124	0.406222	0.154324	0.121097	0.109069	4.07513	0.344946	2.92477	0.506492	0	0	0.456539	0.149758	0	0	0	0
Sol 789	1865	23.7978	0.885369	0.702081	0.991564	0.932411	0.24705	34.364	1.23865	14.1011	0.720847	0.450628	0.156397	0.0441399	0.0574731	5.06265	0.265535	3.07902	0.507945	0	0	0.464259	0.181201	0	0	0	0
Sol 789	1866	17.763	0.667702	1.08936	1.04859	0.839682	0.229778	38.5809	1.95405	15.7811	0.782094	0.466747	0.231954	0.049143	0.0616549	5.09195	0.23946	2.86248	0.53145	0	0	0.723022	0.248034	0	0	0	0
Sol 789	1867	16.7359	0.891483	3.15676	1.47892	0.676827	0.278966	33.3873	1.69333	13.8092	0.993747	0.474508	0.144002	0	0	8.93173	0.344433	2.50432	0.545324	0	0	0.540938	0.194504	1.07326	0.344122	0	0
Sol 789	1868	33.2823	1.19426	0.944804	0.541609	1.32473	0.289548	25.321	0.895983	18.8875	0.730333	0.39379	0.226357	0.111017	0.0918357	5.82028	0.312306	2.41001	0.38751	0.0656699	0.0583152	0.311478	0.162518	4.76619	0.229331	0.384884	0.155581
Sol 789	1869	24.2302	1.29032	1.4416	1.89658	1.0858	0.384227	31.9227	1.13222	13.8043	0.992584	0.533417	0.136527	0	0	7.6906	0.43167	2.762	0.568984	0	0	0.436067	0.148751	0.728058	0.177901	0.0273	0.0586003
Sol 789	1870	20.0542	0.89012	1.24745	1.62289	1.18859	0.300549	36.1684	1.36246	14.2888	0.82086	0.719119	0.208861	0.0345676	0.0502608	9.13176	0.402695	2.55558	0.438063	0	0	0.729298	0.248528	0	0	0.0427227	0.0523269
Sol 789	1871	19.9597	0.804632	0	0	1.14019	0.285447	38.9635	1.9666	13.5716	0.7383	0.788991	0.196538	0.139789	0.112782	8.1319	0.345609	2.73316	0.460903	0	0	0.613892	0.215247	0	0	0	0
Sol 789	1872	24.704	0.962861	2.60204	1.57467	1.23741	0.304005	42.6897	2.14681	12.8933	0.706854	0.759768	0.21035	0.00523328	0.0254189	7.51135	0.31375	3.21551	0.402078	0	0	0.5984	0.212616	0	0	0	0
Sol 789	1873	35.0584	1.84947	1.33002	1.05711	0.990706	0.262084	41.7277	2.15196	15.2906	0.815124	0.650971	0.204625	0.177921	0.127835	8.70354	0.357205	2.76685	0.408452	0	0	0.737	0.25446	0	0	0	0
Sol 789	1874	25.6312	0.998978	0.572578	0.9617	1.03885	0.270495	37.4859	1.3572	13.5447	0.733923	0.661088	0.194335	0	0	7.36452	0.3144	2.47944	0.385373	0	0	0.715404	0.243715	0	0	0	0
Sol 789	1875	32.6086	1.6742	0.0415503	1.11116	1.768	0.5186	30.832	1.5456	17.0539	1.1269	1.3314	0.4048	0.1476	0.1655	12.7812	0.6909	3.0939	0.5666	0	0	0.4698	0.1985	0	0	0	0
Sol 789	1876	29.2367	1.08384	0.53877	0.982575	1.45011	0.32732	34.1603	1.72144	15.1439	0.750615	0.701479	0.174761	0.0772614	0.0829952	9.1468	0.359358	2.7286	0.404794	0	0	0.451286	0.188752	0	0	0	0
Sol 789	1877	21.9962	1.22588	1.7307	1.43593	0.863781	0.255102	37.6559	1.33648	14.8423	0.762775	0.548447	0.166776	0.0673918	0.0772206	4.99074	0.586493	2.41956	0.630294	0	0	0.496665	0.176985	0	0	0	0
Sol 789	1878	32.9081	1.36519	0.82281	0.947024	1.69974	0.360312	28.2663	1.42658	16.8611	0.903123	0.510645	0.17601	0.0486397	0.0627905	6.70171	0.383514	2.56893	0.381484	0.0204769	0.036422	0.457194	0.163649	0	0	0.0143492	0.0381743
Sol 789	1879	24.3427	1.02447	0.704884	1.43343	1.1656	0.294365	21.2147	1.10467	15.4713	0.789144	0.425694	0.155469	0.00830805	0.0313027	5.3353	0.303572	1.60744	0.420327	0	0	0.330228	0.179883	0	0	0	0
Sol 789	1880	20.164	1.06304	0.740721	0.885917	1.04532	0.295472	23.3191	1.11713	16.0445	1.0984	0.6336	0.224039	0	0	6.7863	0.376368	2.2118	0.539197	0	0	0.316222	0.133075	0	0	0	0
Sol 789	1881	22.603	0.938392	0	0	1.2265	0.306522	14.4462	0.748988	11.8081	0.67477	0.172424	0.204338	0.0656458	0.0752103	3.46287	0.926653	1.79062	0.328604	0	0	0.08612	0.119687	0	0	0.0257539	0.0334788
Sol 789	1882	30.4781	1.18866	1.50333	1.02497	2.85269	0.444093	22.8314	0.930062	14.2747	0.738515	0.34461	0.118549	0.0708502	0.0820873	4.51116	0.345779	2.75129	0.403531	0.00262013	0.0124332	0.171376	0.123489	0	0	0.128456	0.140776
Sol 789	1883	34.2602	1.78967	0	0	4.47902	0.384222	25.5576	0.980522	15.0002	0.745171	0.584598	0.187362	0	0	1.9568	0.514881	2.42552	0.40027	0	0	0.16956	0.122351	0	0	0.120163	0.0972807
Sol 789	1884	31.1006	1.15005	0.146815	0.817614	4.44279	0.345046	27.5334	1.02132	15.3124	0.752613	0.77279	0.207445	0.0677747	0.0779206	4.40581	0.332908	2.30687	0.392464	0	0	0.275113	0.148988	0	0	0.0527036	0.0554231
Sol 789	1885	15.3521	0.61198	0.713474	1.03686	1.0636	0.272301	39.9588	1.44113	15.4938	0.78612	0.354109	0.286949	0.0518013	0.065088	6.17254	0.346491	2.14045	0.376609	0	0	0.526436	0.168039	0	0	0	0
Sol 789	1886	21.1111	0.783076	0.905563	0.904951	1.14272	0.280217	28.8725	1.47778	15.7687	0.767937	0.302497	0.248022	0	0	5.46141	0.34022	1.97328	0.361191	0	0	0.239551	0.223327	0	0	0	0
Sol 789	1887	26.4938	0.988143	0.261434	0.859165	1.09267	0.272996	24.974	0.897522	13.1345	0.674722	0.376242	0.162757	0.0459383	0.0588623	5.49048	0.238859	2.28393	0.386707	0	0	0.340964	0.153361	0	0	0	0
Sol 789	1888	24.8543	1.00723	0.628139	1.02403	0.790475	0.226351	28.8481	1.14134	13.6012	0.78461	0.366195	0.140555	0	0	5.10669	0.372672	1.65759	0.339402	0	0	0.578827	0.188421	0	0	0	0
Sol 789	1889	30.5958	1.5743	0	0	0.89707	0.289142	30.0527	1.5065	14.7926	0.800555	0.55549	0.189218	0.0924018	0.0998096	5.77922	0.408868	1.6784	0.473	0	0	0.4854	0.1899	0	0	0	0
Sol 789	1890	22.4396	0.912344	0.656005	0.990091	1.02506	0.271588	34.0247	1.28052	14.9948	0.814519	0.606796	0.196107	0.0729138	0.0837544	6.29166	0.395881	2.01845	0.458753	0	0	0.626565	0.194784	0	0	0.0414779	0.0510266
Sol 789	1891	15.8622	0.8399	0.152751	0.951965	0.903895	0.242326	36.4172	1.30641	14.6111	0.770028	0.4441	0.211	0	0	4.0637	0.4774	2.4562	0.387429	0	0	0.977617	0.226791	0	0	0	0
Sol 789	1892	21.7942	0.848239	1.14562	0.979736	1.06191	0.269803	32.5739	1.18711	13.0104	0.700381	0.678809	0.185304	0	0	5.6082	0.350341	2.44915	0.381969	0	0	0.494969	0.176198	0	0	0	0
Sol 789	1893	25.4418	1.08161	0.716411	1.14811	0.986511	0.300457	36.0173	1.8137	15.5212	0.885227	0.732121	0.227717	0.0506477	0.066826	7.65711	0.458901	2.86518	0.450323	0.0164256	0.0349774	0.509691	0.18291	0	0	0	0
Sol 789	1894	19.842	0.783616	1.00366	1.42211	1.18585	0.292391	38.4501	1.39781	16.4942	0.82947	0.453456	0.25159	0.0749393	0.0840065	10.9596	0.439305	2.87228	0.391447	0	0	0.556765	0.170414	0	0	0	0
Sol 789	1895	17.9525	0.709008	1.80741	1.16931	1.02896	0.267392	43.3453	1.57668	14.9973	0.78692	0.814538	0.200053	0	0	9.50056	0.388038	2.8525	0.406982	0	0	0.673029	0.168664	0	0	0	0
Sol 789	1896	19.807	0.750688	1.90108	1.12243	1.18362	0.291123	43.8857	1.59425	15.37	0.785567	0.856429	0.206774	0.0461484	0.0606507	7.48685	0.301858	2.9602	0.408743	0	0	0.783525	0.193027	0	0	0	0
Sol 789	1897	21.1984	1.13465	1.28277	1.03817	1.10694	0.276376	41.7903	1.48116	14.1607	0.719293	0.800661	0.19331	0.0130025	0.0361569	6.59065	0.257408	2.91204	0.401653	0	0	0.675451	0.16713	0	0	0	0
Sol 789	1898	23.6858	0.881669	0.281817	0.970395	0.978189	0.254147	30.4617	1.12636	13.8701	0.707594	0.616645	0.15637	0	0	5.70151	0.260572	2.42999	0.397018	0	0	0.457444	0.155554	0	0	0	0
Sol 789	1899	18.1217	0.793402	1.98303	1.46401	1.07316	0.283929	34.3571	1.28897	19.5504	0.978432	0.634388	0.200291	0	0	5.69756	0.379407	1.85361	0.34317	0	0	0.475406	0.167441	0	0	0	0
Sol 789	1900	18.2832	0.700275	2.18733	1.48217	0.758081	0.223384	39.4386	1.99364	17.7584	0.85434	0.624876	0.169005	0	0	4.33439	0.316846	2.45368	0.37777	0	0	0.542711	0.192851	0	0	0	0
Sol 789	1901	18.8216	1.03906	0	0	0.848381	0.232291	38.9992	2.05818	14.7022	1.08885	0.663347	0.165495	0.00981611	0.0304897	4.46726	0.502255	2.08426	0.549467	0	0	0.606095	0.216985	0	0	0	0
Sol 789	1902	22.4777	1.1712	0.856757	1.04033	1.00208	0.260803	43.1861	2.1637	17.7513	0.850738	0.737	0.255	0	0	6.3076	0.3484	2.4967	0.5594	0	0	0.9536	0.3145	0	0	0	0
Sol 789	1903	21.6237	0.797959	2.26212	1.06334	0.932352	0.247412	39.0622	1.38454	18.8562	0.88087	0.62556	0.221737	0.0511805	0.0630149	5.29443	0.295094	2.21529	0.380889	0	0	0.717376	0.175697	0	0	0	0
Sol 789	1904	14.3107	0.544995	0	0	0.6555	0.190743	39.2528	1.39904	22.1422	1.00992	0.610484	0.217847	0	0	3.56891	0.371229	1.39213	0.296374	0	0	0.566	0.158926	0	0	0	0
Sol 789	1905	27.25	1.0033	1.45129	1.31849	0.523733	0.167816	32.9793	1.66838	15.379	0.768047	0.334143	0.246114	0	0	3.94571	0.339976	1.96655	0.544983	0	0	0.465823	0.147942	0	0	0	0
Sol 789	1906	32.7981	1.19798	1.72029	1.4036	0.819328	0.224817	35.6353	1.27267	14.504	0.724359	0.443145	0.15517	0	0	4.22538	0.322856	2.82703	0.400227	0	0	0.522206	0.187172	0	0	0	0
Sol 789	1907	36.7049	1.32926	0.758304	0.954962	1.01445	0.259464	30.6879	1.08823	14.301	0.700007	0.3392	0.232442	0.0324001	0.0459092	4.67802	0.254153	3.54066	0.38138	0.0178132	0.0329382	0.448278	0.147232	0	0	0	0
Sol 789	1908	36.8928	1.33748	1.28469	0.968015	0.901599	0.240926	31.3938	1.114	15.8943	0.755511	0.383661	0.15456	0	0	4.13248	0.328673	3.06114	0.526155	0	0	0.459268	0.14966	0	0	0	0
Sol 789	1909	43.1011	2.23727	0.402488	0.856336	1.09192	0.27261	26.0179	1.3295	13.6438	0.943839	0.91059	0.21519	0	0	6.57226	0.256744	2.38992	0.540257	0	0	0.340522	0.159308	0	0	0	0
Sol 789	1910	37.9991	1.37592	1.63695	1.26943	1.27372	0.302478	23.1976	0.823132	15.9152	0.747053	1.12212	0.353392	0.0157336	0.0373111	9.48461	0.365195	3.06994	0.399722	0.0349289	0.0454232	0.280981	0.158756	0	0	0	0
Sol 789	1911	26.2919	0.963525	0.816671	1.04601	1.11554	0.280608	38.0496	1.35144	15.4892	0.761585	0.5928	0.211538	0	0	6.42446	0.251434	3.51232	0.516176	0	0	0.44729	0.147435	0	0	0	0
Sol 789	1912	24.5215	0.946904	1.01248	0.987864	1.10162	0.280347	35.0978	1.28606	16.9489	0.824022	0.980434	0.230912	0.0801493	0.0763986	9.75386	0.38574	3.09075	0.49245	0	0	0.612786	0.176324	0.602239	0.212995	0	0
Sol 789	1913	28.8909	1.06221	1.56561	0.928472	1.25552	0.30032	24.038	0.858925	17.6251	0.818286	0.695087	0.171922	0	0	10.5019	0.573237	2.04304	0.370868	0	0	0.442269	0.1497	0.786214	0.267845	0.00174596	0.0167806
Sol 789	1914	33.4822	1.2196	0.529477	0.780297	0.533672	0.194034	21.383	1.08392	20.3099	0.907399	0.227477	0.20007	0	0	3.71934	0.463473	0.736321	0.254004	0	0	0.272251	0.155548	0	0	0	0
Sol 789	1915	25.1648	1.30948	0	0	0.423659	0.177765	33.2416	1.26334	19.119	0.918346	0.462454	0.161573	0	0	6.00845	0.312565	1.93379	0.359066	0	0	0.439971	0.156329	0	0	0.0322971	0.0407222
Sol 789	1916	15.1241	0.569157	2.15656	1.48028	1.17108	0.28601	43.1085	1.52732	22.5362	1.01587	0.72826	0.252135	0	0	5.27488	0.207678	1.81745	0.348112	0	0	0.687058	0.169375	0	0	0	0
Sol 789	1917	20.8858	0.772821	0.912541	2.13403	1.60293	0.34815	42.1713	2.32783	21.7818	0.985173	0.645574	0.162783	0	0	3.81193	0.363094	1.9164	0.510036	0	0	0.731908	0.178788	0	0	0	0
Sol 789	1918	24.4493	0.899358	4.36772	1.47944	2.51567	0.421875	34.9197	1.24417	21.3377	0.967464	0.277577	0.157182	0.0191244	0.0382991	3.48182	0.387623	3.29923	0.392044	0	0	0.495806	0.142082	0	0	0.244519	0.151034
Sol 789	1919	33.4419	1.78193	0.357237	0.852941	3.07983	0.427379	23.1712	0.82693	18.2787	0.826843	0.225484	0.145596	0.0277787	0.0494671	4.16292	0.328984	2.79832	0.402333	0	0	0.221792	0.141555	0	0	0.0729778	0.0653048
Sol 789	1920	41.6965	1.50853	1.18099	0.828682	4.52245	0.319793	17.5324	0.623468	18.0239	0.806158	0.20044	0.136683	0.164684	0.124299	3.55996	0.506756	3.11239	0.399964	0	0	0.0682789	0.0597913	0	0	0.241621	0.149894
Sol 789	1921	44.1394	1.59087	0.625831	0.83609	3.84785	0.386324	17.6031	0.625525	16.9507	0.766073	0.156698	0.116781	0.302584	0.164399	3.92484	0.352356	2.95194	0.402215	0	0	0.0506402	0.0498747	0.076733	0.0671762	0.278094	0.15792
Sol 789	1922	41.3063	1.49732	0.376075	0.796273	2.68948	0.422689	18.7543	0.668403	15.5279	0.720211	0.231321	0.147421	1.42595	0.303623	4.3027	0.309191	2.8849	0.401505	0	0	0.058708	0.055398	0.0038149	0.0116957	0.165853	0.121272
Sol 789	1923	30.2357	1.11199	1.03299	1.20319	1.5328	0.33351	20.8611	0.743448	15.6447	0.733348	0.412127	0.189493	2.94286	0.406011	6.25442	0.348311	2.08334	0.369481	0	0	0.26044	0.143708	0	0	0.0550023	0.0606066
Sol 789	1924	12.2376	0.442224	2.43549	0.678859	0.866049	0.210743	40.1599	1.42071	16.2436	0.639365	0.662819	0.23121	8.27605	0.303603	4.93499	0.218067	0.837798	0.200271	0	0	0.957943	0.314086	0	0	0.00509964	0.013799
Sol 789	1925	16.1471	0.890634	0.814085	0.976626	0.567812	0.17569	37.3655	1.97213	13.7302	0.694712	0.649949	0.162414	8.31097	0.470494	4.00411	0.345036	0.835581	0.291143	0	0	0.629944	0.157131	0	0	0	0
Sol 789	1926	36.6013	1.8718	0.6303	1.5841	0.715269	0.200561	30.3419	1.5209	12.5903	0.631414	0.3319	0.2323	6.0091	0.3359	3.9956	0.4885	1.29	0.3976	0	0	0.3627	0.2309	0.0155011	0.0301585	0	0
Sol 789	1927	40.3193	2.05906	0.417245	0.744104	0.678208	0.195468	17.3247	0.614954	14.0053	0.93143	0.142433	0.154095	2.75347	0.405207	3.81768	0.50935	2.63755	0.566811	0.075956	0.0746956	0.1704	0.123176	0	0	0.0433055	0.048687
Sol 789	1928	35.1885	1.27851	0.654412	0.829171	1.02531	0.260633	24.5324	0.873342	14.8016	0.702547	0.166343	0.121249	7.11255	0.28137	4.78797	0.250497	2.4457	0.393767	0.0489145	0.053589	0.162399	0.119149	0	0	0.00495147	0.0151545
Sol 789	1929	28.11	1.00387	2.37523	0.665407	1.21949	0.273178	34.3343	1.21846	14.8694	0.591734	0.221761	0.143569	14.1312	0.524046	4.83536	0.254378	1.95362	0.359703	0.0631917	0.0554784	0.153828	0.114529	0	0	0.0644008	0.0563475
Sol 789	1930	22.3359	1.20661	0.736955	0.906325	0.884224	0.234834	35.1744	1.24907	14.1946	1.01155	0.179753	0.128048	14.7387	0.551434	4.1456	0.329879	1.8193	0.493924	0	0	0.146024	0.110885	0	0	0.0185	0.0464003
Sol 789	1931	20.4405	0.731873	1.37828	0.489275	1.01871	0.239288	37.2163	1.89832	16.8762	0.655349	0.436936	0.209441	8.87562	0.325464	3.92816	0.485408	1.4835	0.307123	0.0113499	0.0219436	0.520982	0.132291	0	0	0.0529723	0.0668444
Sol 789	1932	25.4614	0.934563	1.15894	1.05669	1.17127	0.286299	37.5848	1.33677	15.6428	0.768707	0.492541	0.135953	6.57401	0.259587	4.10827	0.335407	1.61918	0.326766	0	0	0.500011	0.13241	0	0	0	0
Sol 789	1933	30.9476	1.12686	0	0	0.608269	0.257891	36.0877	1.27948	17.3826	0.812706	0.49532	0.179933	3.58879	0.377448	3.52035	0.384234	1.7053	0.336736	0	0	0.585062	0.147664	0	0	0	0
Sol 789	1934	24.5461	0.912656	2.05983	1.01774	0.679168	0.200556	38.2932	1.36153	16.9552	0.816887	0.48363	0.153439	4.62631	0.269696	3.83613	0.345459	1.14488	0.259157	0	0	0.544589	0.138437	0	0	0	0
Sol 789	1935	29.1496	1.08765	0.274149	0.872711	0.840329	0.228275	29.061	1.0561	14.7345	0.718864	0.379061	0.148624	4.68864	0.279392	5.35185	0.290299	1.58923	0.324592	0	0	0.32678	0.16227	0	0	0	0
Sol 789	1936	29.8068	1.0911	0.547593	0.911267	1.12332	0.277615	33.1218	1.17549	15.3721	0.739894	0.268082	0.152259	6.00366	0.238651	4.87146	0.252358	2.0524	0.369989	0	0	0.313209	0.161848	0	0	0	0
Sol 789	1937	24.5205	1.27606	2.56918	1.30403	0.671898	0.210982	32.4074	1.14975	16.1047	1.10779	0.364163	0.250061	3.54178	0.385125	4.03647	0.560374	1.38184	0.426717	0	0	0.321105	0.245862	0	0	0	0
Sol 789	1938	50.8599	2.6821	1.6983	1.11861	0.806445	0.219645	13.6087	0.495318	11.1472	0.803401	0.386718	0.158527	3.27368	0.403521	6.58452	0.259825	1.61637	0.327949	0.0439124	0.0482662	0.133757	0.104337	0.0417375	0.0469117	0.0108949	0.0225718
Sol 789	1939	68.7146	2.456	0.12842	0.625174	0.259197	0.174851	9.17186	0.326431	7.22529	0.400564	0.177634	0.125479	3.33629	0.396108	5.5174	0.217758	0.83889	0.202534	0	0	0.0902894	0.0762114	0	0	0	0
Sol 789	1940	62.9894	3.52462	0	0	0.188807	0.146098	12.8533	0.463268	7.78152	0.438505	0.226477	0.145198	0.297579	0.146763	4.72317	0.532024	1.02036	0.236978	0	0	0.154991	0.114658	0	0	0	0
Sol 789	1941	73.0696	3.73997	0	0	0.515862	0.194024	11.4368	0.419015	7.6733	0.430172	0.221376	0.141038	0	0	4.09984	0.32031	1.52433	0.313883	0.000904283	0.00899259	0.137299	0.106103	0	0	0	0
Sol 789	1942	70.7931	2.54471	0.561742	0.947963	0.394662	0.168857	12.4646	0.445332	8.53755	0.453573	0.303719	0.158183	0.0487585	0.0606447	3.6333	0.377862	1.35257	0.290865	0	0	0.152836	0.114381	0	0	0	0
Sol 789	1943	65.4324	2.34418	0	0	0.420892	0.174705	16.8323	0.598111	10.5048	0.529394	0.389701	0.157057	0.0880961	0.0919606	3.62912	0.377325	1.57002	0.320375	0	0	0.288306	0.159855	0	0	0	0
Sol 789	1944	51.779	1.86535	0.52	1.57	0.76525	0.21344	25.0215	1.2547	11.6408	0.8318	0.3181	0.2313	1.08865	0.25146	4.2466	0.447	1.7125	0.4769	0	0	0.534661	0.154557	0	0	0	0
Sol 789	1945	35.4388	1.28611	0	0	1.22492	0.293775	32.2256	1.14385	14.4197	0.702685	0.339169	0.162778	4.91927	0.226148	5.16433	0.213168	2.04046	0.364704	0.0095456	0.0244887	0.418157	0.154598	0.339138	0.161726	0.0720585	0.0700998
Sol 789	1946	26.4032	1.3673	0	0	1.04315	0.265603	36.6458	1.29877	16.2902	0.779784	0.282397	0.158691	7.53776	0.293099	4.14981	0.327979	2.13922	0.374121	0	0	0.301187	0.161877	0.0036493	0.0116478	0	0
Sol 789	1947	27.8265	1.01756	0	0	1.04715	0.266778	35.4443	1.2592	15.9777	0.764928	0.284755	0.158355	6.77657	0.267205	4.17542	0.324336	2.1383	0.375615	0	0	0.30598	0.160714	0	0	0	0
Sol 789	1948	26.4299	0.978633	0	0	0.987377	0.255193	33.2493	1.20391	15.4473	0.759853	0.441537	0.146983	2.29441	0.381675	4.77817	0.28585	1.90652	0.354559	0	0	0.645739	0.16098	0	0	0	0
Sol 789	1949	24.1099	0.932666	1.89833	1.45134	0.71637	0.230544	40.833	2.07247	16.5057	0.820168	0.526643	0.188149	1.97248	0.369283	3.74544	0.354709	1.73212	0.442707	0	0	0.759571	0.256224	0	0	0	0
Sol 789	1950	31.5507	1.15056	2.24029	1.39061	1.41763	0.323354	35.512	1.26116	17.8286	0.833997	0.4013	0.2251	1.30231	0.28555	2.7929	0.5706	1.8321	0.4953	0.023418	0.0377134	0.636644	0.158624	0	0	0.0285	0.0593
Sol 789	1951	33.2593	1.20711	1.23161	0.931718	2.25911	0.403644	31.7195	1.12436	15.8296	0.750816	0.564515	0.143408	3.63482	0.376401	3.4239	0.558668	2.26499	0.384349	0.110424	0.0906948	0.3539	0.231783	0.0590168	0.053019	0.196947	0.134831
Sol 789	1952	22.2099	0.822829	1.53482	1.78887	1.0191	0.260693	39.0114	1.39764	16.4396	0.79912	0.533673	0.154605	4.93091	0.270751	3.77787	0.351201	1.63674	0.441371	0.00657212	0.0192649	0.551276	0.163687	0	0	0.00846427	0.0275802
Sol 789	1953	22.6897	0.833954	0	0	1.44229	0.324788	33.0566	1.657	14.0177	0.9805	0.469783	0.139765	4.25383	0.315801	4.1667	0.4609	1.9303	0.5085	0.12913	0.101948	0.4557	0.2054	0	0	0.0898258	0.0762421
Sol 789	1954	17.2705	0.64448	2.89925	1.50062	1.20537	0.290619	42.97	1.52324	15.3463	0.756183	0.440377	0.150235	5.44908	0.217526	5.90483	0.231191	1.69082	0.335061	0	0	0.805763	0.193787	0	0	0.00239118	0.0104116
Sol 789	1955	16.2071	0.608612	1.19333	1.10115	0.750873	0.214925	42.8489	2.16672	16.5102	0.79904	0.457278	0.145596	3.7855	0.363075	5.37391	0.211914	1.85473	0.352241	0	0	0.711733	0.246002	0	0	0	0
Sol 789	1956	32.0619	1.20563	0	0	1.06586	0.268961	22.8208	1.16425	15.548	0.738156	0.398728	0.1776	1.31474	0.289501	6.06777	0.240009	2.3458	0.493304	0	0	0.287188	0.201206	0	0	0	0
Sol 789	1957	37.4043	1.43969	0.2795	0.748098	1.32967	0.307656	18.9493	0.699929	12.422	0.644416	0.462513	0.156757	3.40584	0.400675	6.33246	0.295618	1.91623	0.356634	0.0387858	0.0454668	0.179992	0.127899	0	0	0.00253155	0.0103794
Sol 789	1958	19.8894	1.05811	1.07018	1.14183	1.33253	0.303478	24.6769	1.26202	13.0586	0.65826	1.01541	0.23427	4.19101	0.521649	3.69126	0.575195	1.01605	0.338485	0.000946317	0.00866628	0.451773	0.146169	0	0	0	0
Sol 789	1959	13.2539	0.536166	1.90786	1.02724	0.923715	0.24333	38.3503	1.39251	18.4376	0.920349	0.734807	0.251675	4.09798	0.332263	4.65236	0.334549	0.921217	0.219623	0	0	0.717644	0.246141	0	0	0	0
Sol 789	1960	29.5561	1.53424	1.20563	1.17918	1.35397	0.312094	21.7812	0.779319	16.707	0.783133	0.303713	0.156142	2.4805	0.397941	4.38715	0.314182	1.95033	0.361635	0.0128407	0.0284509	0.263605	0.155835	0	0	0.00131034	0.00846684
Sol 789	1961	45.2627	1.6512	0.526927	1.13119	1.60692	0.34701	20.2866	1.0441	16.9675	0.775289	0.228652	0.147637	0.767553	0.193115	4.7551	0.344567	3.0957	0.566819	0.029042	0.0430846	0.105478	0.0871043	0.00843822	0.0211973	0.104856	0.0868358
Sol 789	1962	50.0021	1.79939	0	0	2.16795	0.399972	17.9194	0.636389	17.3472	0.777489	0.0954046	0.0798599	0.220754	0.145936	3.1213	0.40107	2.91723	0.40225	0.054928	0.0555375	0.133972	0.103902	0	0	0.219887	0.143123
Sol 789	1963	45.7817	1.6496	0	0	3.41794	0.415134	17.8273	0.632665	17.7553	0.793898	0.176394	0.126391	0.181011	0.123469	3.53991	0.383087	2.86311	0.402085	0	0	0.0856109	0.0728101	0	0	0.368375	0.161979
Sol 789	1964	34.0175	1.2437	0.770319	0.840362	3.17109	0.410955	19.0787	0.677985	15.8195	0.736697	0.26736	0.213516	0.0718202	0.0689778	4.54294	0.280802	2.57969	0.5337	0	0	0.110775	0.0901944	0	0	0.135878	0.105383
Sol 789	1965	24.2707	1.2587	0	0	1.6884	0.5046	37.1825	1.8634	16.0534	1.0906	0.763217	0.229944	0	0	5.81559	0.389016	2.7635	0.5696	0	0	0.415579	0.154496	0	0	0	0
Sol 789	1966	26.7843	1.15583	1.62436	1.20553	1.32724	0.348331	38.7137	1.96137	18.9677	1.21777	0.987849	0.276312	0	0	7.25794	0.461774	2.70375	0.462851	0	0	0.479129	0.166509	0	0	0	0
Sol 789	1967	28.453	1.08032	0.723942	0.871972	1.11422	0.277941	27.3162	0.994716	16.3311	0.796346	1.86218	0.351233	0	0	9.8927	0.390531	2.51474	0.380201	0.00627093	0.019114	0.249439	0.141112	0	0	0	0
Sol 789	1968	30.2394	1.11073	2.97858	1.30472	0.905966	0.241577	27.164	0.966578	21.5297	0.953417	1.64634	0.329289	0	0	8.85164	0.3445	1.3864	0.295958	0	0	0.320931	0.162233	0	0	0	0
Sol 789	1969	32.1262	1.65065	0	0	0.935353	0.245894	23.1212	0.820192	19.9734	0.884402	0.576171	0.146014	0	0	8.48504	0.464106	1.49398	0.310257	0	0	0.269479	0.224059	0	0	0	0
Sol 789	1970	48.4587	2.466	1.26851	1.35147	0.773203	0.224886	27.6142	1.3844	16.1775	1.069	0.6875	0.21655	0.0788719	0.0894375	9.7845	0.5327	3.2646	0.5589	0	0	0.417	0.2201	0	0	0	0
Sol 789	1971	34.3467	1.30741	1.86545	1.36411	0.97108	0.256227	34.3974	1.2495	15.7915	0.76588	0.853392	0.207333	0	0	10.1181	0.398835	2.40481	0.386523	0	0	0.66747	0.172322	0	0	0	0
Sol 789	1972	47.1765	1.74304	0.573388	0.880482	0.654784	0.192067	28.6667	1.01977	13.6219	0.670451	1.01568	0.234147	0	0	10.3508	0.397891	2.0825	0.37293	0	0	0.598131	0.150106	0	0	0	0
Sol 789	1973	29.0751	1.5217	0	0	1.10098	0.274183	31.5836	1.13681	14.1904	0.716352	0.704862	0.174979	0	0	7.5594	0.297371	2.48436	0.383226	0	0	0.415655	0.235338	0	0	0	0
Sol 789	1974	24.9511	0.956824	0.379685	1.21791	1.2678	0.300236	24.825	1.24928	15.1615	0.745625	0.679029	0.17491	0.0350103	0.0491604	7.75582	0.317121	2.67846	0.395015	0	0	0.622073	0.176012	0	0	0	0
Sol 789	1975	26.9473	0.986214	0.673903	1.55467	1.0623	0.267408	23.1111	1.17458	14.0054	0.688682	0.524862	0.144042	0	0	7.44522	0.289091	3.29847	0.500593	0.00338714	0.013449	0.324408	0.215452	0	0	0	0
Sol 789	1976	27.5203	1.0129	0.400596	0.957484	0.993194	0.256438	36.0156	1.27785	14.6139	0.725754	0.485223	0.152584	0.0286668	0.0426237	5.42028	0.244837	3.28062	0.482827	0	0	0.392448	0.206423	0	0	0	0
Sol 789	1977	24.0078	0.937065	0	0	0.764844	0.229398	26.7932	0.967673	13.7756	0.73569	0.627096	0.181099	0.0346962	0.0539263	7.66137	0.331903	2.3295	0.372344	0	0	0.423289	0.150868	0	0	0	0
Sol 789	1978	15.9187	0.84836	1.70292	1.00173	0.927081	0.245277	26.7521	0.957468	16.1758	0.79432	1.10721	0.250743	0.0510857	0.0637722	10.8787	0.419868	2.37423	0.385991	0	0	0.302904	0.158002	0	0	0	0
Sol 789	1979	27.3455	1.46311	1.41842	1.43591	0.693714	0.275605	21.7313	1.13266	18.2095	0.858138	0.5949	0.212067	0.0844664	0.0829479	8.2367	0.464951	1.2517	0.389703	0.0251839	0.0343593	0.2901	0.226837	0	0	0	0
Sol 789	1980	22.347	0.928997	1.09952	1.06014	1.05345	0.275574	24.5855	0.963252	15.8849	1.05664	0.722548	0.216223	0.0544117	0.0685108	7.6218	0.425692	2.37562	0.359088	0.0720438	0.0789475	0.301042	0.145917	0.0407488	0.0495532	0.00464787	0.0158251
Sol 789	1981	21.1078	0.829209	0.937398	0.959456	0.764423	0.248065	33.6802	1.22414	16.4715	0.821223	0.636759	0.197107	0	0	5.19864	0.816629	2.13903	0.369113	0	0	0.349637	0.312536	0	0	0	0
Sol 789	1982	23.9085	0.912278	0.410991	0.882137	0.938352	0.248431	27.0216	0.97778	16.7571	0.834769	0.698921	0.183793	0.0887411	0.091354	5.68756	0.646753	1.50149	0.485303	0	0	0.242461	0.24523	0	0	0	0
Sol 789	1983	22.665	0.871546	0.801081	0.834306	0.903617	0.268072	23.8481	0.869933	18.686	0.870536	0.956594	0.229457	0.0772023	0.0858009	10.0846	0.419061	1.3143	0.286405	0	0	0.325532	0.133985	0	0	0	0
Sol 789	1984	23.6212	0.884769	2.14607	1.1503	1.16455	0.282228	21.8907	0.783074	17.1277	0.79261	0.837822	0.201875	0.116167	0.105859	10.6292	0.419838	1.57127	0.316116	0	0	0.342716	0.159184	0	0	0	0
Sol 789	1985	18.9872	0.715307	1.5067	1.32545	1.23461	0.296243	34.7022	1.2487	15.0824	0.751636	0.874891	0.20948	0.0412941	0.0565356	11.8416	0.458591	2.46026	0.389011	0	0	0.607271	0.153472	0.209467	0.133239	0	0
Sol 789	1986	28.0787	1.15062	0	0	1.05414	0.303341	34.1357	1.30858	15.677	0.821806	0.682899	0.209283	0.054969	0.0697841	8.95038	0.382673	3.18453	0.37861	0	0	0.662697	0.188373	0	0	0	0
Sol 789	1987	37.4707	1.47729	2.02499	1.40445	0.99605	0.267433	29.1467	1.08006	16.501	0.82168	0.521649	0.169623	0.0541139	0.0676692	3.99446	0.328993	3.14103	0.399211	0.023925	0.0343633	0.582336	0.151187	0	0	0	0
Sol 789	1988	32.0934	1.24489	0.15196	0.919523	0.77043	0.222694	31.1235	1.14229	19.19	0.933232	0.66717	0.196884	0	0	3.14688	0.458024	1.93549	0.461297	0	0	0.485436	0.16464	0	0	0	0
Sol 789	1989	22.1607	0.934724	0	0	0.828774	0.239911	36.5815	1.87703	23.045	1.08311	0.860141	0.211096	0	0	3.05623	0.400669	1.54178	0.418331	0	0	0.564667	0.178942	0	0	0.00665765	0.0193964
Sol 789	1990	20.4507	0.760925	3.9766	1.45802	0.826527	0.22715	40.2119	1.43484	22.1561	1.00521	1.35416	0.289542	0	0	2.52955	0.527921	1.44781	0.419635	0	0	0.627198	0.157676	0	0	0	0
Sol 789	1991	35.9008	1.30461	2.07259	1.29817	1.23665	0.295778	27.9588	0.992508	18.4724	0.845223	2.94075	0.40032	0	0	2.98262	0.551731	2.32238	0.38725	0	0	0.331712	0.162517	0	0	0	0
Sol 789	1992	38.2777	1.39474	1.4562	1.7982	0.6812	0.2816	30.8287	1.5453	17.8972	0.828478	0.6149	0.2182	0	0	4.0077	0.4864	2.9394	0.5684	0	0	0.4028	0.2241	0	0	0	0
Sol 789	1993	44.4748	1.60326	0	0	0.673092	0.197847	27.5702	0.977411	14.8574	0.711096	0.38432	0.160381	0	0	3.69927	0.371552	2.47148	0.543584	0	0	0.420476	0.154871	0	0	0	0
Sol 789	1994	47.4764	1.7327	0.190309	0.778011	0.806987	0.222666	25.1734	0.907037	13.5808	0.674384	0.424339	0.151103	0.0366157	0.0496436	3.77916	0.347248	2.32076	0.379838	0	0	0.438688	0.153527	0.028707	0.0363356	0	0
Sol 789	1995	26.2774	1.00911	1.03236	0.992417	1.02456	0.276984	34.1926	1.24824	13.6223	0.754305	0.301289	0.267055	0	0	3.33584	0.714806	2.66794	0.364184	0	0	0.593734	0.153525	0.00578552	0.0203019	0	0
Sol 789	1996	16.9794	0.674292	3.0723	1.58086	0.957203	0.264114	40.9634	1.46732	14.6943	0.77449	0.542043	0.175657	0.0581715	0.0701324	5.28547	0.338721	2.53042	0.380725	0	0	0.652727	0.226239	0	0	0	0
Sol 789	1997	21.4018	0.788654	0.4975	0.862787	0.4592	0.241749	25.0081	0.889172	14.198	1.00457	0.2732	0.223334	0	0	4.9225	0.306743	0.9987	0.329504	0	0	0.403821	0.157672	0	0	0	0
Sol 789	1998	23.9214	0.947749	0	0	0.665073	0.201701	25.9811	1.025	18.712	0.900685	0.405494	0.149419	0	0	6.35171	0.355565	0.707917	0.259422	0	0	0.471565	0.170615	0	0	0	0
Sol 789	1999	24.0726	1.25762	1.11894	1.80095	0.594119	0.204304	30.0802	1.06962	17.6298	1.20175	0.182906	0.190075	0	0	3.44756	0.636816	0.227149	0.219197	0	0	0.3854	0.196183	0	0	0	0
Sol 789	2000	28.2384	1.45731	0.404423	0.839839	0.749134	0.264269	25.6779	1.2893	17.094	0.910664	0.38615	0.137706	0.0311142	0.0471506	6.83197	0.476012	2.48229	0.299717	0	0	0.3424	0.231802	0.0113675	0.0270088	0	0
Sol 789	2001	26.6372	1.12097	0.608934	1.30075	1.49328	0.343417	32.4241	1.63999	16.8049	0.86055	0.416982	0.146468	0.0114507	0.038373	7.20037	0.422613	2.60985	0.340243	0	0	0.347951	0.210398	1.34188	0.287719	0.206837	0.125545
[truncated: 4,497 more rows]
